# Supplementary material for: Single-cell transcriptome reveals the heterogeneity of malignant ductal cells and the prognostic value of REG4 and SPINK1 in primary pancreatic ductal adenocarcinoma
Source: PeerJ. 2024 May 28;12:e17350. doi: 10.7717/peerj.17350 (PMC11141562; doi:10.7717/peerj.17350)
Supplement: Supplemental Information 2 [file peerj-12-17350-s002.xlsx]

## Sheet: S1
Single-cell transcriptome reveals the heterogeneity of malignant ductal cells and the prognostic value of REG4 and SPINK1 in primary pancreatic ductal adenocarcinoma
Yutian Ji, Qianhui Xu & Weilin Wang
Supplementary Table 1. Information of 16 PDAC and 3 adjacent normal samples from dataset.
Sample	ID from GSE155698
GSM4710689	PDAC_TISSUE_1
GSM4710690	PDAC_TISSUE_2
GSM4710691	PDAC_TISSUE_3
GSM4710692	PDAC_TISSUE_4
GSM4710693	PDAC_TISSUE_5
GSM4710694	PDAC_TISSUE_6
GSM4710695	PDAC_TISSUE_7
GSM4710696	PDAC_TISSUE_8
GSM4710697	PDAC_TISSUE_9
GSM4710698	PDAC_TISSUE_10
GSM4710699	PDAC_TISSUE_11A
GSM4710700	PDAC_TISSUE_11B
GSM4710701	PDAC_TISSUE_12
GSM4710702	PDAC_TISSUE_13
GSM4710703	PDAC_TISSUE_14
GSM4710704	PDAC_TISSUE_15
GSM4710705	PDAC_TISSUE_16
GSM4710706	AdjNorm_TISSUE_1
GSM4710707	AdjNorm_TISSUE_2
GSM4710708	AdjNorm_TISSUE_3

## Sheet: S2
Supplementary Table 2. Information of single cells from 16 PDAC and 3 adjacent normal samples.
	orig.ident	nCount_RNA	nFeature_RNA	percent.mt	doublet.class	pANN	RNA_snn_res.0.8	seurat_clusters	group	celltype	S.Score	G2M.Score	Phase
AAACCCAGTCCGACGT-1_1_1_1_1_1_1	NT1	2163	1003	10.8645	Singlet	0.251412	14	14	NT	CAFs	0.00117185	-0.0673307	S
AAACCCATCTGCACCT-1_1_1_1_1_1_1	NT1	630	360	0.15873	Singlet	0.10452	21	21	NT	Others	-0.0121873	-0.0619066	G1
AAACGAAAGCGACCCT-1_1_1_1_1_1_1	NT1	16097	827	0.0248494	Singlet	0.265537	10	10	NT	NK_cells	-0.0141201	-0.0360941	G1
AAACGAAAGCGGACAT-1_1_1_1_1_1_1	NT1	4165	1527	6.86675	Singlet	0.112994	3	3	NT	T_cells	0.0450164	0.0577552	G2M
AAACGAACAACAGATA-1_1_1_1_1_1_1	NT1	1214	542	3.21252	Singlet	0.101695	4	4	NT	Myeloid_cells	-0.0277483	-0.0349926	G1
AAACGAATCGAAGCAG-1_1_1_1_1_1_1	NT1	2864	1058	4.9581	Singlet	0.0169492	8	8	NT	T_cells	-0.003321	-0.000154879	G1
AAACGAATCTGGACTA-1_1_1_1_1_1_1	NT1	3946	1464	9.3259	Singlet	0.0367232	3	3	NT	T_cells	0.0491979	-0.0769045	S
AAACGCTAGTCTCTGA-1_1_1_1_1_1_1	NT1	3367	1429	8.55361	Singlet	0.251412	12	12	NT	T_cells	0.0442205	0.0202392	S
AAACGCTCATCGGAAG-1_1_1_1_1_1_1	NT1	942	507	7.74947	Singlet	0.0903955	4	4	NT	Myeloid_cells	0.0393419	-0.0322972	S
AAACGCTGTGATTGGG-1_1_1_1_1_1_1	NT1	5310	1598	10.904	Singlet	0.347458	6	6	NT	Myeloid_cells	0.00603441	-0.0642056	S
AAACGCTGTTCAGGTT-1_1_1_1_1_1_1	NT1	3673	1293	7.51429	Singlet	0.00847458	3	3	NT	T_cells	0.0233192	-0.00350547	S
AAACGCTTCGGCTGGT-1_1_1_1_1_1_1	NT1	1370	702	11.4599	Singlet	0.20904	11	11	NT	Ductal_cells	0.0559129	-0.0477035	S
AAAGAACTCGGTCATA-1_1_1_1_1_1_1	NT1	1105	504	21.629	Singlet	0.0141243	2	2	NT	Myeloid_cells	-0.0231441	-0.020188	G1
AAAGGATAGGACGCTA-1_1_1_1_1_1_1	NT1	691	476	0	Singlet	0.146893	22	22	NT	Ductal_cells	-0.0364968	0.0295926	G2M
AAAGGATAGGGTGAAA-1_1_1_1_1_1_1	NT1	6274	2141	6.31176	Singlet	0.375706	14	14	NT	CAFs	0.0236276	-0.0983399	S
AAAGGATAGGGTGAGG-1_1_1_1_1_1_1	NT1	3082	1223	5.41856	Singlet	0.00564972	3	3	NT	T_cells	0.0580039	0.075871	G2M
AAAGGATAGTATAGAC-1_1_1_1_1_1_1	NT1	13882	674	0.0144071	Singlet	0.262712	10	10	NT	NK_cells	-0.0139822	-0.0404786	G1
AAAGGATCACTACTTT-1_1_1_1_1_1_1	NT1	3611	1273	5.20631	Singlet	0.00282486	8	8	NT	T_cells	-0.00908	-0.0430629	G1
AAAGGATGTCCTTTGC-1_1_1_1_1_1_1	NT1	2078	1171	9.57652	Singlet	0.262712	20	20	NT	Ductal_cells	0.487929	0.317671	S
AAAGGATGTTGGGTTT-1_1_1_1_1_1_1	NT1	890	481	4.60674	Singlet	0.0847458	4	4	NT	Myeloid_cells	-0.0177764	-0.085006	G1
AAAGGGCGTACTCGAT-1_1_1_1_1_1_1	NT1	4845	1613	4.7678	Singlet	0.079096	0	0	NT	T_cells	-0.00814935	-0.0230554	G1
AAAGGGCGTGTTCATG-1_1_1_1_1_1_1	NT1	6017	1683	9.2571	Singlet	0.240113	13	13	NT	B_cells	-0.0171648	-0.0265719	G1
AAAGGGCTCACAAGAA-1_1_1_1_1_1_1	NT1	1196	635	1.08696	Singlet	0.0282486	2	2	NT	Myeloid_cells	0.0340477	0.00755977	S
AAAGGTACAATTTCCT-1_1_1_1_1_1_1	NT1	3924	1427	4.66361	Singlet	0.0480226	3	3	NT	T_cells	-0.0263771	-0.0125699	G1
AAAGGTACAGGCACTC-1_1_1_1_1_1_1	NT1	858	428	2.68065	Singlet	0.00282486	2	2	NT	Myeloid_cells	-0.0109466	-0.0827721	G1
AAAGTCCAGCGACTTT-1_1_1_1_1_1_1	NT1	4331	1519	7.06534	Singlet	0.0564972	3	3	NT	T_cells	0.0124759	-0.0150461	S
AAAGTCCGTATCCTTT-1_1_1_1_1_1_1	NT1	5572	1823	4.41493	Singlet	0.132768	0	0	NT	T_cells	0.0781216	-0.0255288	S
AAAGTCCGTTAGTTCG-1_1_1_1_1_1_1	NT1	624	350	10.7372	Singlet	0.00282486	2	2	NT	Myeloid_cells	-0.0174659	-0.0599049	G1
AAAGTCCTCGTGTGGC-1_1_1_1_1_1_1	NT1	3377	1217	5.18211	Singlet	0.0225989	8	8	NT	T_cells	-0.00613725	-0.0510979	G1
AAAGTGACACGCGCAT-1_1_1_1_1_1_1	NT1	2712	1194	6.0472	Singlet	0.0367232	17	17	NT	NK_cells	0.112126	-0.0462613	S
AAAGTGACAGATGCGA-1_1_1_1_1_1_1	NT1	19933	956	0.697336	Singlet	0.262712	10	10	NT	NK_cells	-0.00788758	-0.0400525	G1
AAAGTGACATCCTGTC-1_1_1_1_1_1_1	NT1	6319	1901	11.5208	Singlet	0.313559	14	14	NT	CAFs	-0.0591462	-0.0576498	G1
AAAGTGACATCTTTCA-1_1_1_1_1_1_1	NT1	4243	1579	5.60924	Singlet	0.127119	3	3	NT	T_cells	-0.00146716	0.0280394	G2M
AAAGTGATCATACAGC-1_1_1_1_1_1_1	NT1	1283	653	11.2237	Singlet	0.019774	7	7	NT	Myeloid_cells	-0.0354611	0.0341967	G2M
AAAGTGATCCGACGGT-1_1_1_1_1_1_1	NT1	2301	1030	2.47718	Singlet	0.00847458	0	0	NT	T_cells	-0.0101682	-0.0648482	G1
AAATGGATCTCCCTAG-1_1_1_1_1_1_1	NT1	3442	1264	4.15456	Singlet	0.00564972	3	3	NT	T_cells	-0.0410664	0.0580039	G2M
AACAAAGAGTCGCCCA-1_1_1_1_1_1_1	NT1	3598	1358	7.28182	Singlet	0.0225989	3	3	NT	T_cells	-0.0221152	-0.0579407	G1
AACAAAGAGTTCGCAT-1_1_1_1_1_1_1	NT1	1567	775	7.0836	Singlet	0.265537	11	11	NT	Ductal_cells	-0.0435391	0.068343	G2M
AACAAAGCAGAACTTC-1_1_1_1_1_1_1	NT1	12828	922	1.26286	Singlet	0.274011	10	10	NT	NK_cells	-0.0218283	-0.0474554	G1
AACAAAGCATAGACTC-1_1_1_1_1_1_1	NT1	4783	1560	6.75308	Singlet	0.0225989	3	3	NT	T_cells	0.0349322	0.0287172	S
AACAAAGGTACGTTCA-1_1_1_1_1_1_1	NT1	3933	1372	5.51742	Singlet	0.0141243	3	3	NT	T_cells	0.0250658	-0.0266708	S
AACAAAGGTGGCCCAT-1_1_1_1_1_1_1	NT1	4306	1411	6.40966	Singlet	0.0225989	3	3	NT	T_cells	-0.0162589	0.0134912	G2M
AACAAAGGTTCTCTCG-1_1_1_1_1_1_1	NT1	21772	1226	0.450119	Singlet	0.271186	10	10	NT	NK_cells	-0.0145542	-0.0430866	G1
AACAACCCATGTGGCC-1_1_1_1_1_1_1	NT1	1445	687	3.94464	Singlet	0.10452	14	14	NT	CAFs	-0.0428595	-0.0918764	G1
AACAACCGTCGAGTTT-1_1_1_1_1_1_1	NT1	4781	1667	6.52583	Singlet	0.276836	5	5	NT	Myeloid_cells	-0.058999	-0.0022651	G1
AACAACCTCAGAGCAG-1_1_1_1_1_1_1	NT1	1921	862	4.11244	Singlet	0.141243	4	4	NT	Myeloid_cells	-0.0416167	-0.10122	G1
AACAAGAGTTGTGCCG-1_1_1_1_1_1_1	NT1	3276	1257	5.98291	Singlet	0.019774	3	3	NT	T_cells	0.0432134	-0.0415527	S
AACACACGTAGGACTG-1_1_1_1_1_1_1	NT1	811	420	7.27497	Singlet	0.0564972	18	18	NT	T_cells	-0.0191501	-0.0564682	G1
AACAGGGCAACGAGGT-1_1_1_1_1_1_1	NT1	4267	1644	4.49965	Singlet	0.183616	8	8	NT	T_cells	0.122183	-0.0278779	S
AACAGGGGTCTTCGAA-1_1_1_1_1_1_1	NT1	4227	1399	5.25195	Singlet	0.0141243	3	3	NT	T_cells	-0.0105113	-0.00309219	G1
AACAGGGGTTCAAAGA-1_1_1_1_1_1_1	NT1	8603	2428	7.03243	Singlet	0.251412	3	3	NT	T_cells	0.0186898	-0.0110384	S
AACCAACCAAGGTTGG-1_1_1_1_1_1_1	NT1	3998	1732	13.8069	Singlet	0.341808	14	14	NT	CAFs	-0.0751158	-0.0176274	G1
AACCAACTCGCACGAC-1_1_1_1_1_1_1	NT1	6130	370	0.391517	Singlet	0.251412	10	10	NT	NK_cells	-0.0135171	-0.0276243	G1
AACCACAAGCACCCAC-1_1_1_1_1_1_1	NT1	37078	1714	0.0188791	Singlet	0.271186	10	10	NT	NK_cells	-0.0177587	-0.0427868	G1
AACCACACAACCGATT-1_1_1_1_1_1_1	NT1	3747	1301	5.5778	Singlet	0.347458	6	6	NT	Myeloid_cells	-0.0178428	-0.0877778	G1
AACCACATCTAACGGT-1_1_1_1_1_1_1	NT1	6261	1878	8.09775	Singlet	0.358757	6	6	NT	Myeloid_cells	0.0259707	-0.0681982	S
AACCATGCAGCTACAT-1_1_1_1_1_1_1	NT1	833	338	4.68187	Singlet	0.0310734	4	4	NT	Myeloid_cells	-0.0173866	-0.00643883	G1
AACCATGGTATGACAA-1_1_1_1_1_1_1	NT1	914	460	3.17287	Singlet	0.0875706	4	4	NT	Myeloid_cells	-0.0156809	-0.0140295	G1
AACCATGTCCAACACA-1_1_1_1_1_1_1	NT1	1849	781	1.6225	Singlet	0.059322	2	2	NT	Myeloid_cells	-0.035454	-0.00248968	G1
AACCCAACACTGCATA-1_1_1_1_1_1_1	NT1	3796	1595	5.82192	Singlet	0.19209	9	9	NT	NK_cells	0.050732	0.0528514	G2M
AACCCAAGTGGAATGC-1_1_1_1_1_1_1	NT1	3493	1259	5.09591	Singlet	0.0141243	3	3	NT	T_cells	0.0189768	0.000615048	S
AACCCAAGTTCCTTGC-1_1_1_1_1_1_1	NT1	4414	1390	6.95514	Singlet	0.240113	13	13	NT	B_cells	-0.0250733	-0.0141547	G1
AACCTGAAGAACCCGA-1_1_1_1_1_1_1	NT1	5536	1712	3.63078	Singlet	0.101695	17	17	NT	NK_cells	0.146378	-0.0310197	S
AACCTGAAGTCCCAAT-1_1_1_1_1_1_1	NT1	6125	1873	5.32245	Singlet	0.336158	4	4	NT	Myeloid_cells	-0.0354166	-0.0568527	G1
AACCTGAGTTAAACCC-1_1_1_1_1_1_1	NT1	3777	1393	6.75139	Singlet	0.019774	3	3	NT	T_cells	0.0160996	-0.00482819	S
AACCTGATCGAAACAA-1_1_1_1_1_1_1	NT1	5977	1834	6.92655	Singlet	0.361582	6	6	NT	Myeloid_cells	0.0013482	-0.101575	S
AACCTTTGTATCGTGT-1_1_1_1_1_1_1	NT1	3420	1252	5.2924	Singlet	0.00847458	3	3	NT	T_cells	-0.0470145	-0.0332222	G1
AACCTTTTCCTGTAAG-1_1_1_1_1_1_1	NT1	601	352	3.99334	Singlet	0.00847458	2	2	NT	Myeloid_cells	-0.0198617	-0.00548288	G1
AACGAAAAGTAGCCAG-1_1_1_1_1_1_1	NT1	4142	1415	7.87059	Singlet	0.0225989	3	3	NT	T_cells	0.0202393	-0.0763289	S
AACGAAACAAGACCTT-1_1_1_1_1_1_1	NT1	4850	1533	7.09278	Singlet	0.0282486	3	3	NT	T_cells	0.0314832	0.0417087	G2M
AACGAAATCGGCTATA-1_1_1_1_1_1_1	NT1	1396	637	0.2149	Singlet	0.19774	22	22	NT	Ductal_cells	-0.0361124	-0.0375419	G1
AACGGGAAGTCGTTAC-1_1_1_1_1_1_1	NT1	1476	650	0.135501	Singlet	0.0875706	21	21	NT	Others	0.0786418	-0.0348946	S
AACGGGATCTAGGCAT-1_1_1_1_1_1_1	NT1	4119	1434	5.29255	Singlet	0.141243	17	17	NT	NK_cells	0.00340625	-0.0610524	S
AACGGGATCTTGCAGA-1_1_1_1_1_1_1	NT1	1771	822	2.87973	Singlet	0.0734463	7	7	NT	Myeloid_cells	-0.0336676	-0.0089317	G1
AACGTCAGTCTACGAT-1_1_1_1_1_1_1	NT1	3775	1615	0.0794702	Singlet	0.347458	22	22	NT	Ductal_cells	-0.00809973	-0.0119172	G1
AACTTCTAGAAGCGCT-1_1_1_1_1_1_1	NT1	1109	513	21.4608	Singlet	0.0564972	0	0	NT	T_cells	-0.0253228	-0.0181379	G1
AACTTCTAGACTTCCA-1_1_1_1_1_1_1	NT1	4182	1357	4.83022	Singlet	0.0960452	0	0	NT	T_cells	0.0422213	-0.050232	S
AACTTCTCAAGGAGTC-1_1_1_1_1_1_1	NT1	4471	1567	10.5122	Singlet	0.0367232	3	3	NT	T_cells	0.100303	-0.0164791	S
AACTTCTCACAATGCT-1_1_1_1_1_1_1	NT1	5599	1859	7.6978	Singlet	0.361582	6	6	NT	Myeloid_cells	0.00717605	0.00868261	G2M
AACTTCTGTTGTTTGG-1_1_1_1_1_1_1	NT1	796	461	3.26633	Singlet	0	2	2	NT	Myeloid_cells	-0.0245013	-0.00349378	G1
AACTTCTTCTGACCCT-1_1_1_1_1_1_1	NT1	4028	1475	3.57498	Singlet	0.059322	0	0	NT	T_cells	0.0857211	-0.0174461	S
AAGACAAAGATGGTCG-1_1_1_1_1_1_1	NT1	792	427	2.65152	Singlet	0	2	2	NT	Myeloid_cells	-0.017703	-0.0595011	G1
AAGACAAAGCAATAAC-1_1_1_1_1_1_1	NT1	4021	1503	5.44641	Singlet	0.0564972	3	3	NT	T_cells	-0.0553035	-0.0671226	G1
AAGACAACAACCCGCA-1_1_1_1_1_1_1	NT1	5717	474	0.0524751	Singlet	0.265537	10	10	NT	NK_cells	0.0117254	-0.0405645	S
AAGACAACATCCGGCA-1_1_1_1_1_1_1	NT1	1852	721	7.88337	Singlet	0.0536723	7	7	NT	Myeloid_cells	-0.035065	-0.0552879	G1
AAGACAAGTACAAGTA-1_1_1_1_1_1_1	NT1	6614	1795	3.22044	Singlet	0.0734463	12	12	NT	T_cells	0.0323129	0.032088	S
AAGACAAGTAGACACG-1_1_1_1_1_1_1	NT1	1148	638	6.70732	Singlet	0.115819	4	4	NT	Myeloid_cells	-0.0308141	0.0124343	G2M
AAGACAATCTTCACAT-1_1_1_1_1_1_1	NT1	3727	1404	3.97102	Singlet	0.019774	0	0	NT	T_cells	-0.0591454	-0.0625453	G1
AAGACTCAGACATAGT-1_1_1_1_1_1_1	NT1	6724	1942	15.9131	Singlet	0.322034	4	4	NT	Myeloid_cells	-0.0346184	-0.0321179	G1
AAGACTCAGGATACCG-1_1_1_1_1_1_1	NT1	5889	2163	9.83189	Singlet	0.389831	14	14	NT	CAFs	-0.00829849	-0.0194932	G1
AAGACTCCATGACGAG-1_1_1_1_1_1_1	NT1	782	400	1.27877	Singlet	0	7	7	NT	Myeloid_cells	-0.0222291	0.0576548	G2M
AAGACTCTCGGATTAC-1_1_1_1_1_1_1	NT1	1810	830	21.4917	Singlet	0.132768	4	4	NT	Myeloid_cells	0.0209433	-0.0219436	S
AAGATAGCAATGGCAG-1_1_1_1_1_1_1	NT1	2262	853	6.98497	Singlet	0.161017	11	11	NT	Ductal_cells	-0.0362087	0.0228364	G2M
AAGATAGCATGACGAG-1_1_1_1_1_1_1	NT1	696	390	4.74138	Singlet	0.0367232	1	1	NT	Ductal_cells	-0.0185182	-0.00808728	G1
AAGATAGGTCTTCGAA-1_1_1_1_1_1_1	NT1	1680	718	10	Singlet	0.059322	7	7	NT	Myeloid_cells	-0.035453	-0.00321463	G1
AAGATAGTCCAAGGGA-1_1_1_1_1_1_1	NT1	17652	1869	1.70519	Singlet	0.0338983	3	3	NT	T_cells	-0.0131124	-0.0339461	G1
AAGATAGTCCGCCTAT-1_1_1_1_1_1_1	NT1	4556	1298	7.08955	Singlet	0.19209	13	13	NT	B_cells	0.00955707	0.0211854	G2M
AAGATAGTCCGCTTAC-1_1_1_1_1_1_1	NT1	1074	529	7.26257	Singlet	0.0847458	4	4	NT	Myeloid_cells	-0.031627	-0.0697403	G1
AAGCATCCAAGCGATG-1_1_1_1_1_1_1	NT1	22104	901	0.393594	Singlet	0.257062	10	10	NT	NK_cells	0.000520002	-0.0369886	S
AAGCATCCAGCTTTCC-1_1_1_1_1_1_1	NT1	3882	1548	6.33694	Singlet	0.310734	14	14	NT	CAFs	-0.0746502	-0.0424313	G1
AAGCATCCAGTTCTAG-1_1_1_1_1_1_1	NT1	3991	1452	9.89727	Singlet	0.039548	3	3	NT	T_cells	0.0445098	-0.0241632	S
AAGCATCGTGGACCTC-1_1_1_1_1_1_1	NT1	543	330	9.39227	Singlet	0.00847458	2	2	NT	Myeloid_cells	-0.0186865	-0.00042831	G1
AAGCATCTCCATCACC-1_1_1_1_1_1_1	NT1	3868	1465	5.32575	Singlet	0.0621469	3	3	NT	T_cells	-0.0282837	0.0426686	G2M
AAGCATCTCTGCTAGA-1_1_1_1_1_1_1	NT1	1306	581	4.13476	Singlet	0.0903955	4	4	NT	Myeloid_cells	0.0149235	-0.0419452	S
AAGCCATCAACGACTT-1_1_1_1_1_1_1	NT1	547	358	8.22669	Singlet	0.0423729	5	5	NT	Myeloid_cells	-0.0186435	-0.0630712	G1
AAGCCATTCACGGAGA-1_1_1_1_1_1_1	NT1	577	329	3.81282	Singlet	0.0310734	18	18	NT	T_cells	-0.016129	-0.00626537	G1
AAGCCATTCCGATCGG-1_1_1_1_1_1_1	NT1	6131	1829	9.26439	Singlet	0.358757	6	6	NT	Myeloid_cells	-0.0142791	0.00236764	G2M
AAGCGAGAGTCCCAAT-1_1_1_1_1_1_1	NT1	606	360	0.165017	Singlet	0.0508475	4	4	NT	Myeloid_cells	-0.0233358	0.00438287	G2M
AAGCGAGGTAACGATA-1_1_1_1_1_1_1	NT1	1137	634	18.5576	Singlet	0.0875706	22	22	NT	Ductal_cells	-0.0531893	-0.0400319	G1
AAGCGAGGTCGTATGT-1_1_1_1_1_1_1	NT1	4537	1453	6.45801	Singlet	0.0254237	3	3	NT	T_cells	0.0352028	-0.0623349	S
AAGCGAGTCAGTGTCA-1_1_1_1_1_1_1	NT1	6493	1926	7.62359	Singlet	0.194915	0	0	NT	T_cells	0.0208308	-0.036355	S
AAGCGTTAGCGCCATC-1_1_1_1_1_1_1	NT1	897	473	10.2564	Singlet	0.00564972	2	2	NT	Myeloid_cells	-0.0357895	0.0260354	G2M
AAGCGTTGTCTCTCTG-1_1_1_1_1_1_1	NT1	815	437	6.25767	Singlet	0.00282486	2	2	NT	Myeloid_cells	-0.0298849	0.0378665	G2M
AAGGAATGTACCGTGC-1_1_1_1_1_1_1	NT1	1244	654	5.7074	Singlet	0.200565	11	11	NT	Ductal_cells	-0.0270649	-0.0825575	G1
AAGGAATGTACTCCCT-1_1_1_1_1_1_1	NT1	4246	1630	5.65238	Singlet	0.265537	9	9	NT	NK_cells	0.0291138	-0.0492269	S
AAGGTAAGTCCAAAGG-1_1_1_1_1_1_1	NT1	1792	657	18.9174	Singlet	0.0960452	4	4	NT	Myeloid_cells	-0.0456878	0.00226682	G2M
AAGGTAAGTCCTGTTC-1_1_1_1_1_1_1	NT1	4144	1417	5.81564	Singlet	0.019774	3	3	NT	T_cells	-0.0427248	0.0292393	G2M
AAGGTAATCTGTCAGA-1_1_1_1_1_1_1	NT1	3284	1252	9.0134	Singlet	0.0225989	3	3	NT	T_cells	0.144415	-0.0251797	S
AAGTACCGTTCTTGTT-1_1_1_1_1_1_1	NT1	3143	1251	6.29971	Singlet	0.0112994	3	3	NT	T_cells	0.0905313	-0.0688049	S
AAGTACCTCGACATAC-1_1_1_1_1_1_1	NT1	773	400	5.30401	Singlet	0.0367232	19	19	NT	Myeloid_cells	0.102508	-0.0531972	S
AAGTCGTAGCCTAACT-1_1_1_1_1_1_1	NT1	906	551	6.95364	Singlet	0.0508475	23	23	NT	T_cells	0.0223432	0.710358	G2M
AAGTCGTAGCTGTACT-1_1_1_1_1_1_1	NT1	5074	1626	6.30666	Singlet	0.0734463	3	3	NT	T_cells	-0.0545922	0.00530356	G2M
AAGTCGTCATCAGCGC-1_1_1_1_1_1_1	NT1	6073	389	2.22295	Singlet	0.240113	10	10	NT	NK_cells	-0.0154354	-0.0325222	G1
AAGTGAAAGTTCCGGC-1_1_1_1_1_1_1	NT1	3468	1263	13.6678	Singlet	0.00847458	3	3	NT	T_cells	-0.0528551	-0.0549812	G1
AAGTGAACAACAACAA-1_1_1_1_1_1_1	NT1	878	491	5.58087	Singlet	0.10452	4	4	NT	Myeloid_cells	-0.0221121	-0.0341756	G1
AAGTGAAGTTCCTAAG-1_1_1_1_1_1_1	NT1	4010	1648	3.59102	Singlet	0.251412	9	9	NT	NK_cells	0.0137439	0.00977033	S
AAGTTCGAGCAAGCCA-1_1_1_1_1_1_1	NT1	1423	642	13.071	Singlet	0.155367	11	11	NT	Ductal_cells	-0.0295479	-0.073237	G1
AAGTTCGAGGACTTCT-1_1_1_1_1_1_1	NT1	1509	728	4.24122	Singlet	0.132768	4	4	NT	Myeloid_cells	-0.0429467	-0.0863489	G1
AAGTTCGAGGCTTAGG-1_1_1_1_1_1_1	NT1	6052	422	3.65169	Singlet	0.240113	10	10	NT	NK_cells	-0.0168354	-0.0297839	G1
AAGTTCGTCCCTGGTT-1_1_1_1_1_1_1	NT1	4251	1319	4.70478	Singlet	0.00564972	3	3	NT	T_cells	0.0279719	-0.0561507	S
AAGTTCGTCGGACGTC-1_1_1_1_1_1_1	NT1	1223	715	8.66721	Singlet	0.118644	20	20	NT	Ductal_cells	-0.0441579	-0.00525576	G1
AATAGAGAGCGTTGTT-1_1_1_1_1_1_1	NT1	5278	1780	8.867	Singlet	0.364407	6	6	NT	Myeloid_cells	0.0614219	-0.0437168	S
AATAGAGCACCCTTAC-1_1_1_1_1_1_1	NT1	1576	681	4.44162	Singlet	0.059322	7	7	NT	Myeloid_cells	-0.0370867	-0.047743	G1
AATAGAGCACCTCAGG-1_1_1_1_1_1_1	NT1	3971	1337	3.29892	Singlet	0.0112994	3	3	NT	T_cells	0.0464094	0.0330087	S
AATAGAGCACGGCCAT-1_1_1_1_1_1_1	NT1	563	360	18.4725	Singlet	0.0734463	18	18	NT	T_cells	0.282345	-0.0034539	S
AATAGAGCAGGATTCT-1_1_1_1_1_1_1	NT1	5305	1688	5.29689	Singlet	0.355932	6	6	NT	Myeloid_cells	-0.0364917	-0.0347247	G1
AATAGAGGTTTGATCG-1_1_1_1_1_1_1	NT1	34807	1575	0.778579	Singlet	0.274011	10	10	NT	NK_cells	-0.0137199	-0.0433943	G1
AATAGAGTCAATCTCT-1_1_1_1_1_1_1	NT1	713	463	11.0799	Singlet	0.112994	20	20	NT	Ductal_cells	-0.02545	0.0027394	G2M
AATAGAGTCTATTTCG-1_1_1_1_1_1_1	NT1	3393	1273	7.78073	Singlet	0.0112994	3	3	NT	T_cells	-0.0394805	-0.050044	G1
AATCGACGTCGGTACC-1_1_1_1_1_1_1	NT1	3426	1291	8.99008	Singlet	0.0621469	17	17	NT	NK_cells	-0.050244	0.00628711	G2M
AATCGACTCCGTGGTG-1_1_1_1_1_1_1	NT1	1933	809	7.24263	Singlet	0.0112994	3	3	NT	T_cells	-0.0351423	-0.0209402	G1
AATCGTGAGCCAACCC-1_1_1_1_1_1_1	NT1	1587	766	3.02457	Singlet	0.0677966	7	7	NT	Myeloid_cells	-0.0444262	0.00570404	G2M
AATCGTGAGGACGCAT-1_1_1_1_1_1_1	NT1	639	397	6.41628	Singlet	0.0819209	4	4	NT	Myeloid_cells	-0.010397	-0.0131145	G1
AATCGTGAGTTGTCAC-1_1_1_1_1_1_1	NT1	3119	1176	8.5925	Singlet	0.0225989	3	3	NT	T_cells	-0.00730478	-0.0075438	G1
AATCGTGTCCATTTGT-1_1_1_1_1_1_1	NT1	845	330	24.8521	Singlet	0.0734463	0	0	NT	T_cells	-0.029877	0.00582075	G2M
AATGAAGAGGGTGAAA-1_1_1_1_1_1_1	NT1	598	335	3.67893	Singlet	0.00564972	2	2	NT	Myeloid_cells	-0.0163512	-0.0584728	G1
AATGACCAGCACTCTA-1_1_1_1_1_1_1	NT1	729	450	8.36763	Singlet	0	7	7	NT	Myeloid_cells	-0.0297892	-0.0197121	G1
AATGACCCATATGGCT-1_1_1_1_1_1_1	NT1	7173	2234	11.0693	Singlet	0.361582	14	14	NT	CAFs	-0.0327377	0.0504555	G2M
AATGACCGTCTTAGTG-1_1_1_1_1_1_1	NT1	837	444	7.28793	Singlet	0.0932203	4	4	NT	Myeloid_cells	-0.029622	-0.0308186	G1
AATGCCAAGTCGGCCT-1_1_1_1_1_1_1	NT1	682	406	1.90616	Singlet	0	2	2	NT	Myeloid_cells	-0.0173589	0.0586375	G2M
AATGCCATCATCGCCT-1_1_1_1_1_1_1	NT1	1232	660	3.32792	Singlet	0.0508475	2	2	NT	Myeloid_cells	-0.0245116	-0.000200689	G1
AATGCCATCCCATTCG-1_1_1_1_1_1_1	NT1	1333	766	6.0015	Singlet	0.112994	23	23	NT	T_cells	0.114905	0.77009	G2M
AATGCCATCGTCGACG-1_1_1_1_1_1_1	NT1	10062	2412	5.16796	Singlet	0.322034	14	14	NT	CAFs	-0.0251614	-0.0678756	G1
AATGCCATCTGGCCAG-1_1_1_1_1_1_1	NT1	550	321	6.18182	Singlet	0.00282486	2	2	NT	Myeloid_cells	-0.0222516	-0.0512083	G1
AATGGAAAGACTCAAA-1_1_1_1_1_1_1	NT1	1749	831	4.05946	Singlet	0.240113	5	5	NT	Myeloid_cells	-0.027949	-0.0880221	G1
AATGGAAAGTAACCGG-1_1_1_1_1_1_1	NT1	2764	1022	4.77569	Singlet	0.0169492	8	8	NT	T_cells	0.0026571	-0.0400164	S
AATGGAAAGTAGCCAG-1_1_1_1_1_1_1	NT1	4741	1542	5.52626	Singlet	0.0338983	3	3	NT	T_cells	-0.0338489	-0.00723863	G1
AATGGAACATATACCG-1_1_1_1_1_1_1	NT1	6404	1915	6.40225	Singlet	0.367232	6	6	NT	Myeloid_cells	-0.0342502	-0.0287577	G1
AATGGCTCATATACCG-1_1_1_1_1_1_1	NT1	811	448	1.35635	Singlet	0.0112994	2	2	NT	Myeloid_cells	-0.0175543	-0.0272774	G1
AATGGCTTCGCCGATG-1_1_1_1_1_1_1	NT1	1587	795	3.33963	Singlet	0.0762712	7	7	NT	Myeloid_cells	-0.0378976	0.0336799	G2M
AATTCCTCACCTCTGT-1_1_1_1_1_1_1	NT1	2396	1040	8.05509	Singlet	0.268362	11	11	NT	Ductal_cells	-0.0209938	0.0445909	G2M
AATTCCTCATACGCAT-1_1_1_1_1_1_1	NT1	7591	2429	7.46937	Singlet	0.384181	14	14	NT	CAFs	-0.051301	-0.0967092	G1
AATTCCTCATAGAAAC-1_1_1_1_1_1_1	NT1	3409	1467	5.92549	Singlet	0.322034	4	4	NT	Myeloid_cells	-0.0388962	-0.0147015	G1
AATTCCTGTACGGCAA-1_1_1_1_1_1_1	NT1	669	440	4.4843	Singlet	0.039548	19	19	NT	Myeloid_cells	0.0415247	0.0808034	G2M
AATTTCCAGGGCTGAT-1_1_1_1_1_1_1	NT1	856	315	5.37383	Singlet	0.121469	24	24	NT	Others	-0.0288159	-0.0376128	G1
AATTTCCCAAACCACT-1_1_1_1_1_1_1	NT1	5179	1759	6.4105	Singlet	0.355932	6	6	NT	Myeloid_cells	-0.0490389	-0.0849381	G1
AATTTCCCATCCCGTT-1_1_1_1_1_1_1	NT1	748	422	2.80749	Singlet	0.0451977	1	1	NT	Ductal_cells	-0.0359415	-0.0584848	G1
AATTTCCTCGCCTCTA-1_1_1_1_1_1_1	NT1	4487	1671	6.61912	Singlet	0.163842	3	3	NT	T_cells	0.035353	-0.0480305	S
ACAAAGACAACGTTAC-1_1_1_1_1_1_1	NT1	14377	564	0.0278222	Singlet	0.257062	10	10	NT	NK_cells	-0.0121674	-0.0263658	G1
ACAAAGATCCTACTGC-1_1_1_1_1_1_1	NT1	575	352	3.30435	Singlet	0	2	2	NT	Myeloid_cells	-0.0223498	-0.0578776	G1
ACAAAGATCTGCATGA-1_1_1_1_1_1_1	NT1	4468	1545	6.40107	Singlet	0.0423729	3	3	NT	T_cells	0.0806236	0.0726397	S
ACAACCAAGCGCCCAT-1_1_1_1_1_1_1	NT1	835	561	5.02994	Singlet	0.0706215	14	14	NT	CAFs	-0.0452151	-0.0297397	G1
ACAACCAAGGTCACAG-1_1_1_1_1_1_1	NT1	3930	1519	4.17303	Singlet	0.0734463	8	8	NT	T_cells	0.0791042	-0.0302787	S
ACAACCAGTGGAGGTT-1_1_1_1_1_1_1	NT1	3817	1384	7.4928	Singlet	0.0141243	3	3	NT	T_cells	-0.0210374	0.0388825	G2M
ACAACCAGTGGGATTG-1_1_1_1_1_1_1	NT1	1026	535	1.46199	Singlet	0	2	2	NT	Myeloid_cells	0.0395491	0.0218613	S
ACAAGCTCAGATTAAG-1_1_1_1_1_1_1	NT1	6123	1892	8.16593	Singlet	0.361582	6	6	NT	Myeloid_cells	-0.0599312	-0.00959319	G1
ACAAGCTGTAAGCTCT-1_1_1_1_1_1_1	NT1	653	371	1.99081	Singlet	0.00282486	2	2	NT	Myeloid_cells	-0.0317809	0.0355161	G2M
ACAAGCTGTTGAGAGC-1_1_1_1_1_1_1	NT1	5980	404	0.0668896	Singlet	0.254237	10	10	NT	NK_cells	0.0236322	-0.0137538	S
ACAAGCTTCCGACAGC-1_1_1_1_1_1_1	NT1	3512	1315	2.3918	Singlet	0.019774	3	3	NT	T_cells	0.018613	-0.0868812	S
ACACAGTAGGACAAGA-1_1_1_1_1_1_1	NT1	1374	806	10.1892	Singlet	0.177966	20	20	NT	Ductal_cells	-0.046871	0.0406325	G2M
ACACAGTAGGGCAATC-1_1_1_1_1_1_1	NT1	675	382	6.37037	Singlet	0.0423729	1	1	NT	Ductal_cells	-0.0306205	-0.00784686	G1
ACACAGTCATCGATGT-1_1_1_1_1_1_1	NT1	4524	1618	7.05128	Singlet	0.0706215	3	3	NT	T_cells	0.0314954	-0.00288714	S
ACACAGTGTCATCAGT-1_1_1_1_1_1_1	NT1	4539	1596	6.36704	Singlet	0.101695	3	3	NT	T_cells	0.0356411	0.101863	G2M
ACACAGTTCCGGGACT-1_1_1_1_1_1_1	NT1	3073	1180	4.91377	Singlet	0.00564972	3	3	NT	T_cells	-0.0512301	-0.0481864	G1
ACACCAACAAATAAGC-1_1_1_1_1_1_1	NT1	1771	677	17.1654	Singlet	0.0988701	4	4	NT	Myeloid_cells	-0.0474391	0.0485063	G2M
ACACCAACAGACTCTA-1_1_1_1_1_1_1	NT1	4915	1923	2.05493	Singlet	0.29096	9	9	NT	NK_cells	0.0114846	-0.0263959	S
ACACCAATCCTGTTAT-1_1_1_1_1_1_1	NT1	1376	608	3.99709	Singlet	0.0367232	0	0	NT	T_cells	-0.0273314	-0.0766686	G1
ACACCAATCGCCATAA-1_1_1_1_1_1_1	NT1	3683	1379	3.58403	Singlet	0.378531	10	10	NT	NK_cells	0.0203319	-0.066124	S
ACACGCGAGAATAGTC-1_1_1_1_1_1_1	NT1	873	468	1.37457	Singlet	0.00564972	2	2	NT	Myeloid_cells	0.0408951	0.0398044	S
ACACGCGGTTAGTTCG-1_1_1_1_1_1_1	NT1	662	408	16.0121	Singlet	0.135593	11	11	NT	Ductal_cells	-0.0420863	-0.0531931	G1
ACACTGACATGGGTCC-1_1_1_1_1_1_1	NT1	964	541	4.77178	Singlet	0.00564972	2	2	NT	Myeloid_cells	-0.0284027	0.150025	G2M
ACAGAAAAGTTCTCTT-1_1_1_1_1_1_1	NT1	731	394	3.28317	Singlet	0.0367232	1	1	NT	Ductal_cells	-0.0215183	-0.0538566	G1
ACAGAAAGTTATAGAG-1_1_1_1_1_1_1	NT1	3792	1538	7.72679	Singlet	0.0988701	8	8	NT	T_cells	-0.0320672	-0.00128176	G1
ACAGCCGAGAGTTGAT-1_1_1_1_1_1_1	NT1	2063	785	2.22976	Singlet	0.0536723	2	2	NT	Myeloid_cells	-0.0265398	0.0171731	G2M
ACAGCCGAGCTAAATG-1_1_1_1_1_1_1	NT1	4170	1504	6.76259	Singlet	0.0564972	3	3	NT	T_cells	0.18306	-0.0214256	S
ACAGGGAGTGTTGAGG-1_1_1_1_1_1_1	NT1	4782	1772	5.70891	Singlet	0.265537	9	9	NT	NK_cells	0.061202	-0.037963	S
ACAGGGATCAAGAAAC-1_1_1_1_1_1_1	NT1	616	388	5.19481	Singlet	0.039548	19	19	NT	Myeloid_cells	0.0497139	-0.0605132	S
ACAGGGATCTTAGGAC-1_1_1_1_1_1_1	NT1	7437	2230	2.60858	Singlet	0.211864	3	3	NT	T_cells	0.0309318	-0.00827735	S
ACATCCCGTATCAGGG-1_1_1_1_1_1_1	NT1	2323	909	2.8842	Singlet	0.0706215	2	2	NT	Myeloid_cells	-0.028857	-0.0617762	G1
ACATCCCTCTCAGGCG-1_1_1_1_1_1_1	NT1	4042	1482	4.7996	Singlet	0.0875706	3	3	NT	T_cells	-0.0114187	0.0312157	G2M
ACATCCCTCTGGTGGC-1_1_1_1_1_1_1	NT1	3605	1417	6.60194	Singlet	0.115819	3	3	NT	T_cells	0.0187207	0.056181	G2M
ACATCGAAGCGCTGCT-1_1_1_1_1_1_1	NT1	602	413	3.32226	Singlet	0.0480226	21	21	NT	Others	0.0435647	-0.0712353	S
ACATCGACACCGTGCA-1_1_1_1_1_1_1	NT1	1002	530	2.29541	Singlet	0.0112994	7	7	NT	Myeloid_cells	-0.0187526	0.0200067	G2M
ACATCGAGTACAACGG-1_1_1_1_1_1_1	NT1	1237	620	15.6831	Singlet	0.0254237	2	2	NT	Myeloid_cells	-0.0355571	0.0634841	G2M
ACATCGAGTGTGTGTT-1_1_1_1_1_1_1	NT1	4049	1175	7.21166	Singlet	0.0677966	17	17	NT	NK_cells	0.0244734	-0.0163195	S
ACATCGATCAACACCA-1_1_1_1_1_1_1	NT1	5691	1554	7.53822	Singlet	0.223164	13	13	NT	B_cells	0.017439	-0.0134386	S
ACATCGATCGAGATAA-1_1_1_1_1_1_1	NT1	980	480	2.55102	Singlet	0.0141243	2	2	NT	Myeloid_cells	0.0380754	-0.0734825	S
ACATGCACAAGTTCCA-1_1_1_1_1_1_1	NT1	529	358	3.78072	Singlet	0.0423729	5	5	NT	Myeloid_cells	-0.0210938	-0.0579882	G1
ACATGCACATCACAGT-1_1_1_1_1_1_1	NT1	2108	1187	8.39658	Singlet	0.251412	20	20	NT	Ductal_cells	-0.0512602	-0.0126282	G1
ACATTTCAGGTAATCA-1_1_1_1_1_1_1	NT1	4261	1549	4.6468	Singlet	0.220339	9	9	NT	NK_cells	0.00751138	-0.0386711	S
ACCAAACCAACTACGT-1_1_1_1_1_1_1	NT1	980	522	1.02041	Singlet	0.0112994	2	2	NT	Myeloid_cells	-0.0294835	-0.073937	G1
ACCAAACCAAGAGAGA-1_1_1_1_1_1_1	NT1	999	475	3.5035	Singlet	0.0762712	4	4	NT	Myeloid_cells	0.039278	-0.0281409	S
ACCAAACCAGGATGAC-1_1_1_1_1_1_1	NT1	8510	1343	0.493537	Singlet	0.194915	24	24	NT	Others	0.0537987	-0.0599444	S
ACCAAACGTTGCCAAT-1_1_1_1_1_1_1	NT1	4862	1742	5.71781	Singlet	0.19209	17	17	NT	NK_cells	0.0279847	-0.0359838	S
ACCAACAAGGGCTGAT-1_1_1_1_1_1_1	NT1	11340	2452	1.30511	Singlet	0.327684	1	1	NT	Ductal_cells	-0.02659	-0.0555833	G1
ACCAACAGTGACTAAA-1_1_1_1_1_1_1	NT1	7187	2199	4.98122	Singlet	0.240113	3	3	NT	T_cells	-0.0407987	0.0366699	G2M
ACCAACAGTGCTATTG-1_1_1_1_1_1_1	NT1	5522	1742	7.02644	Singlet	0.305085	14	14	NT	CAFs	-0.0506672	0.00659291	G2M
ACCAACATCTATGTGG-1_1_1_1_1_1_1	NT1	4620	1574	7.18615	Singlet	0.0621469	3	3	NT	T_cells	-0.00869375	-0.0093235	G1
ACCACAACAGCGTGCT-1_1_1_1_1_1_1	NT1	4140	1326	5.65217	Singlet	0.0112994	3	3	NT	T_cells	0.0110575	-0.0202974	S
ACCACAACAGCTACCG-1_1_1_1_1_1_1	NT1	833	429	7.56303	Singlet	0.0903955	4	4	NT	Myeloid_cells	-0.0334811	-0.0598552	G1
ACCACAAGTTGTGGCC-1_1_1_1_1_1_1	NT1	4617	1525	2.79402	Singlet	0.0903955	9	9	NT	NK_cells	0.0409475	0.0372998	S
ACCACAATCAGTCATG-1_1_1_1_1_1_1	NT1	2093	930	1.81558	Singlet	0.138418	4	4	NT	Myeloid_cells	-0.0373067	-0.056842	G1
ACCACAATCATTCATC-1_1_1_1_1_1_1	NT1	599	372	7.51252	Singlet	0.0903955	4	4	NT	Myeloid_cells	-0.0216534	-0.0115921	G1
ACCACAATCCTACCAC-1_1_1_1_1_1_1	NT1	675	343	2.22222	Singlet	0.0536723	2	2	NT	Myeloid_cells	0.0571157	-0.0544424	S
ACCATTTTCCCATAAG-1_1_1_1_1_1_1	NT1	4481	1483	6.11471	Singlet	0.0225989	3	3	NT	T_cells	-0.000261189	0.00270032	G2M
ACCATTTTCGTTGTGA-1_1_1_1_1_1_1	NT1	1033	522	2.90416	Singlet	0	2	2	NT	Myeloid_cells	-0.0312822	0.0656572	G2M
ACCCAAAAGAAGCTGC-1_1_1_1_1_1_1	NT1	6944	2112	7.8485	Singlet	0.347458	14	14	NT	CAFs	0.00154088	-0.113154	S
ACCCAAAAGGCTGGAT-1_1_1_1_1_1_1	NT1	1345	597	1.33829	Singlet	0.019774	2	2	NT	Myeloid_cells	-0.0313869	0.0539633	G2M
ACCCTCAAGGCTAGCA-1_1_1_1_1_1_1	NT1	982	522	1.222	Singlet	0.019774	7	7	NT	Myeloid_cells	-0.0290627	-0.0307905	G1
ACCCTCAGTCCCACGA-1_1_1_1_1_1_1	NT1	4487	1629	5.05906	Singlet	0.118644	3	3	NT	T_cells	0.0613673	-0.044444	S
ACCCTCATCAGTAGGG-1_1_1_1_1_1_1	NT1	3780	1351	9.65608	Singlet	0.0112994	3	3	NT	T_cells	-0.0251389	-0.0389817	G1
ACCCTTGAGCATGGGT-1_1_1_1_1_1_1	NT1	4413	1574	7.22864	Singlet	0.0734463	3	3	NT	T_cells	0.0854244	-0.0399563	S
ACCCTTGAGCGACTGA-1_1_1_1_1_1_1	NT1	1028	520	2.62646	Singlet	0.107345	4	4	NT	Myeloid_cells	-0.0260611	0.0115453	G2M
ACCCTTGAGCTACAAA-1_1_1_1_1_1_1	NT1	3885	1341	3.9897	Singlet	0.019774	3	3	NT	T_cells	0.0435792	-0.0561122	S
ACCGTTCGTTGCCATA-1_1_1_1_1_1_1	NT1	4466	1503	9.31482	Singlet	0.0338983	3	3	NT	T_cells	0.039459	-0.0256356	S
ACCGTTCTCTATCGTT-1_1_1_1_1_1_1	NT1	4840	1590	7.2314	Singlet	0.240113	13	13	NT	B_cells	-0.0117575	-0.0738135	G1
ACCTACCAGATACAGT-1_1_1_1_1_1_1	NT1	2825	1230	1.62832	Singlet	0.223164	21	21	NT	Others	-0.0273529	-0.0902559	G1
ACCTACCAGCATCCTA-1_1_1_1_1_1_1	NT1	8558	654	0.0701098	Singlet	0.271186	10	10	NT	NK_cells	-0.0212138	-0.0417444	G1
ACCTACCTCGAACGCC-1_1_1_1_1_1_1	NT1	3436	1314	8.44005	Singlet	0.0338983	3	3	NT	T_cells	0.0089562	-0.0282838	S
ACCTACCTCTACTGAG-1_1_1_1_1_1_1	NT1	4086	1459	4.1116	Singlet	0.0282486	3	3	NT	T_cells	0.0639406	-0.000105572	S
ACCTGAAAGCTAATCC-1_1_1_1_1_1_1	NT1	584	336	1.88356	Singlet	0.0734463	21	21	NT	Others	-0.00892544	-0.0640622	G1
ACCTGAACAAGCTGCC-1_1_1_1_1_1_1	NT1	6112	510	0.0163613	Singlet	0.262712	10	10	NT	NK_cells	-0.0200014	-0.0278414	G1
ACCTGAACACGGGTAA-1_1_1_1_1_1_1	NT1	1052	587	6.46388	Singlet	0.0734463	1	1	NT	Ductal_cells	-0.0482179	-0.0875014	G1
ACCTGAACAGGCGATA-1_1_1_1_1_1_1	NT1	4437	1585	5.34145	Singlet	0.0847458	3	3	NT	T_cells	0.0302567	-0.013676	S
ACCTGTCGTAGCGCTC-1_1_1_1_1_1_1	NT1	4056	1449	4.95562	Singlet	0.0141243	3	3	NT	T_cells	0.0435422	-0.0321236	S
ACGATCAAGTATCCTG-1_1_1_1_1_1_1	NT1	3940	1669	4.03553	Singlet	0.279661	9	9	NT	NK_cells	-0.00146883	0.00443195	G2M
ACGATCAGTGCCTTCT-1_1_1_1_1_1_1	NT1	5437	1868	6.75005	Singlet	0.367232	6	6	NT	Myeloid_cells	0.0430284	-0.0250298	S
ACGATGTCACTCGATA-1_1_1_1_1_1_1	NT1	23411	1079	1.31562	Singlet	0.262712	10	10	NT	NK_cells	-0.00289608	-0.0381686	G1
ACGATGTCAGTAGAAT-1_1_1_1_1_1_1	NT1	834	496	2.51799	Singlet	0.0112994	2	2	NT	Myeloid_cells	-0.0225218	0.129069	G2M
ACGATGTCATGTTTGG-1_1_1_1_1_1_1	NT1	4267	1574	6.16358	Singlet	0.10452	3	3	NT	T_cells	0.0500061	0.025576	S
ACGATGTGTATTTCGG-1_1_1_1_1_1_1	NT1	6440	1836	4.68944	Singlet	0.361582	6	6	NT	Myeloid_cells	-0.0310131	-0.0601504	G1
ACGCACGTCGCAAGAG-1_1_1_1_1_1_1	NT1	577	336	5.54593	Singlet	0.079096	4	4	NT	Myeloid_cells	-0.0215053	-0.0548066	G1
ACGCACGTCTAGACCA-1_1_1_1_1_1_1	NT1	748	435	2.80749	Singlet	0.00282486	2	2	NT	Myeloid_cells	-0.0217521	-0.0693235	G1
ACGCACGTCTCGGTAA-1_1_1_1_1_1_1	NT1	5306	1868	7.57633	Singlet	0.333333	14	14	NT	CAFs	0.054332	-0.0717581	S
ACGGAAGGTGCGAACA-1_1_1_1_1_1_1	NT1	4524	1493	5.74713	Singlet	0.319209	6	6	NT	Myeloid_cells	0.0386478	-0.0141236	S
ACGGGTCTCCCTCAAC-1_1_1_1_1_1_1	NT1	637	452	3.92465	Singlet	0.0621469	4	4	NT	Myeloid_cells	-0.0364275	-0.0594621	G1
ACGGTCGAGACATGCG-1_1_1_1_1_1_1	NT1	1224	556	0.980392	Singlet	0.0225989	2	2	NT	Myeloid_cells	0.0327679	0.0757991	G2M
ACGGTTACATCTCGTC-1_1_1_1_1_1_1	NT1	701	412	5.70613	Singlet	0.0367232	19	19	NT	Myeloid_cells	-0.0222381	-0.0620794	G1
ACGGTTATCTGGACCG-1_1_1_1_1_1_1	NT1	23676	1299	0.135158	Singlet	0.271186	10	10	NT	NK_cells	-0.00593221	-0.0475379	G1
ACGTAACCACAACGCC-1_1_1_1_1_1_1	NT1	3839	1387	4.92316	Singlet	0.0112994	3	3	NT	T_cells	0.0086977	-0.0158123	S
ACGTAACGTCCACTTC-1_1_1_1_1_1_1	NT1	3818	1449	6.07648	Singlet	0.0564972	3	3	NT	T_cells	0.0469672	-0.0299143	S
ACGTACAAGGGATCTG-1_1_1_1_1_1_1	NT1	4424	1509	8.34087	Singlet	0.0310734	3	3	NT	T_cells	0.0218289	-0.00556935	S
ACGTACACACTTGACA-1_1_1_1_1_1_1	NT1	544	343	4.22794	Singlet	0.00282486	2	2	NT	Myeloid_cells	-0.0168492	-0.0592073	G1
ACGTACACATCCGGTG-1_1_1_1_1_1_1	NT1	2641	1025	4.16509	Singlet	0.0282486	8	8	NT	T_cells	0.0325431	0.0265194	S
ACGTACAGTTCAGGTT-1_1_1_1_1_1_1	NT1	602	345	1.82724	Singlet	0.0508475	4	4	NT	Myeloid_cells	-0.0198511	-0.0550654	G1
ACGTAGTAGCCATGCC-1_1_1_1_1_1_1	NT1	511	318	3.32681	Singlet	0.0451977	4	4	NT	Myeloid_cells	-0.0111786	-0.0506832	G1
ACGTAGTCAGCTGTAT-1_1_1_1_1_1_1	NT1	606	322	10.5611	Singlet	0.0451977	2	2	NT	Myeloid_cells	-0.0162815	0.0177254	G2M
ACGTAGTGTGCAGATG-1_1_1_1_1_1_1	NT1	12696	754	1.74858	Singlet	0.265537	10	10	NT	NK_cells	0.0122138	-0.0317553	S
ACGTAGTTCACTGAAC-1_1_1_1_1_1_1	NT1	6671	2162	6.50577	Singlet	0.372881	4	4	NT	Myeloid_cells	0.0334646	-0.06239	S
ACGTAGTTCCGTCAAA-1_1_1_1_1_1_1	NT1	795	386	3.52201	Singlet	0.0677966	4	4	NT	Myeloid_cells	0.0464833	-0.0624144	S
ACGTCCTAGGCATGGT-1_1_1_1_1_1_1	NT1	4525	1517	4	Singlet	0.039548	8	8	NT	T_cells	0.00940258	0.016509	G2M
ACGTCCTCAGAAACCG-1_1_1_1_1_1_1	NT1	1194	580	2.76382	Singlet	0.019774	7	7	NT	Myeloid_cells	0.0535903	0.0450829	S
ACGTCCTGTGTCCACG-1_1_1_1_1_1_1	NT1	4287	1353	7.90763	Singlet	0.220339	13	13	NT	B_cells	0.0720152	-0.0698207	S
ACGTTCCCAACTACGT-1_1_1_1_1_1_1	NT1	4905	1648	6.44241	Singlet	0.0564972	3	3	NT	T_cells	0.0324183	-0.038533	S
ACTACGACATCTGTTT-1_1_1_1_1_1_1	NT1	1875	834	0.8	Singlet	0.0734463	7	7	NT	Myeloid_cells	0.00900754	0.0564508	G2M
ACTACGAGTCTACATG-1_1_1_1_1_1_1	NT1	760	495	7.36842	Singlet	0.0762712	5	5	NT	Myeloid_cells	-0.0314309	-0.0220033	G1
ACTACGAGTGAGGCAT-1_1_1_1_1_1_1	NT1	4195	1404	4.31466	Singlet	0.0225989	3	3	NT	T_cells	0.0498519	0.0241971	S
ACTACGATCTAGGCCG-1_1_1_1_1_1_1	NT1	3401	1343	4.20465	Singlet	0.0508475	8	8	NT	T_cells	-0.0166588	0.0424153	G2M
ACTATCTGTTAGAAGT-1_1_1_1_1_1_1	NT1	8507	2328	9.32174	Singlet	0.344633	14	14	NT	CAFs	-0.0321131	-0.0636938	G1
ACTATGGGTGGGTCAA-1_1_1_1_1_1_1	NT1	31617	1110	0.08856	Singlet	0.262712	10	10	NT	NK_cells	-0.0149683	-0.0168926	G1
ACTATTCAGCGGATCA-1_1_1_1_1_1_1	NT1	6228	1970	8.62235	Singlet	0.183616	3	3	NT	T_cells	0.0362782	-0.0162019	S
ACTATTCCAGAACTTC-1_1_1_1_1_1_1	NT1	10769	555	2.30291	Singlet	0.251412	10	10	NT	NK_cells	-0.0167755	-0.032524	G1
ACTATTCCAGGGATAC-1_1_1_1_1_1_1	NT1	4268	1502	3.88941	Singlet	0.341808	6	6	NT	Myeloid_cells	0.0512001	-0.0230179	S
ACTATTCCAGTTTCAG-1_1_1_1_1_1_1	NT1	3491	1402	4.29676	Singlet	0.0621469	3	3	NT	T_cells	-0.0136118	-0.0296552	G1
ACTCCCATCGAACGGA-1_1_1_1_1_1_1	NT1	1209	487	17.6179	Singlet	0.00282486	2	2	NT	Myeloid_cells	-0.0267009	-0.0165274	G1
ACTCTCGAGATCACCT-1_1_1_1_1_1_1	NT1	2900	1225	4.13793	Singlet	0.288136	4	4	NT	Myeloid_cells	-0.0105316	0.0560321	G2M
ACTCTCGCACCGTCTT-1_1_1_1_1_1_1	NT1	1070	567	0.560748	Singlet	0.00847458	7	7	NT	Myeloid_cells	0.0839667	0.141887	G2M
ACTCTCGGTTGCATTG-1_1_1_1_1_1_1	NT1	6324	1909	9.51929	Singlet	0.353107	6	6	NT	Myeloid_cells	-0.0133745	-0.0900168	G1
ACTCTCGGTTGTCCCT-1_1_1_1_1_1_1	NT1	3559	1393	2.5288	Singlet	0.257062	9	9	NT	NK_cells	-0.0238633	-0.058941	G1
ACTCTCGTCCGCACTT-1_1_1_1_1_1_1	NT1	8551	2270	8.03415	Singlet	0.336158	14	14	NT	CAFs	-0.0121989	-0.0952815	G1
ACTCTCGTCGCCTCTA-1_1_1_1_1_1_1	NT1	5366	1487	6.87663	Singlet	0.347458	6	6	NT	Myeloid_cells	0.0254896	-0.0411645	S
ACTGATGTCAATCAGC-1_1_1_1_1_1_1	NT1	3614	1231	4.89762	Singlet	0.0112994	3	3	NT	T_cells	0.0884383	-0.0267665	S
ACTGCAACAGACCAGA-1_1_1_1_1_1_1	NT1	11771	556	0.288845	Singlet	0.251412	10	10	NT	NK_cells	0.003719	-0.0349943	S
ACTGCAATCAAATGAG-1_1_1_1_1_1_1	NT1	27208	1111	0.0147016	Singlet	0.262712	10	10	NT	NK_cells	-0.016584	-0.0320258	G1
ACTGCAATCGGATTAC-1_1_1_1_1_1_1	NT1	1451	765	18.1943	Singlet	0.0903955	0	0	NT	T_cells	-0.0641521	-0.00372927	G1
ACTGTCCCAGCGTTTA-1_1_1_1_1_1_1	NT1	3834	1411	7.04225	Singlet	0.0451977	3	3	NT	T_cells	-0.012171	-0.0222018	G1
ACTGTCCCATTCAGGT-1_1_1_1_1_1_1	NT1	1332	536	0.750751	Singlet	0.00564972	2	2	NT	Myeloid_cells	-0.0230518	-0.0323273	G1
ACTGTCCTCCGTATGA-1_1_1_1_1_1_1	NT1	4526	1532	6.80513	Singlet	0.0508475	3	3	NT	T_cells	0.0396785	-0.014091	S
ACTGTCCTCTCAGGCG-1_1_1_1_1_1_1	NT1	2766	1238	9.72523	Singlet	0.29661	14	14	NT	CAFs	0.0644671	-0.0203116	S
ACTGTCCTCTCCGTGT-1_1_1_1_1_1_1	NT1	1016	525	6.29921	Singlet	0.121469	4	4	NT	Myeloid_cells	-0.0283007	-0.0784285	G1
ACTGTGAAGCAGCAGT-1_1_1_1_1_1_1	NT1	3614	1353	3.59712	Singlet	0.107345	9	9	NT	NK_cells	0.0388844	-0.0322664	S
ACTGTGACAGACCGCT-1_1_1_1_1_1_1	NT1	660	343	1.21212	Singlet	0.0451977	1	1	NT	Ductal_cells	0.116817	-0.0629257	S
ACTGTGAGTTATCTGG-1_1_1_1_1_1_1	NT1	3149	1277	5.33503	Singlet	0.019774	3	3	NT	T_cells	0.0168828	0.0233878	G2M
ACTTAGGAGAGATTCA-1_1_1_1_1_1_1	NT1	720	452	5.55556	Singlet	0.0847458	4	4	NT	Myeloid_cells	-0.0345076	-0.0301979	G1
ACTTAGGGTCCAATCA-1_1_1_1_1_1_1	NT1	1617	726	3.15399	Singlet	0.059322	2	2	NT	Myeloid_cells	-0.0282599	0.0806967	G2M
ACTTAGGTCATTGGTG-1_1_1_1_1_1_1	NT1	3533	1245	7.07614	Singlet	0.00564972	3	3	NT	T_cells	-0.0145407	0.0156176	G2M
ACTTATCAGGCATTTC-1_1_1_1_1_1_1	NT1	506	339	7.31225	Singlet	0.0480226	5	5	NT	Myeloid_cells	-0.0195128	0.0186162	G2M
ACTTATCCACGAAAGC-1_1_1_1_1_1_1	NT1	5809	1962	2.94371	Singlet	0.242938	17	17	NT	NK_cells	-0.0424721	-0.0408642	G1
ACTTATCGTGATACTC-1_1_1_1_1_1_1	NT1	3103	1185	6.67096	Singlet	0.0112994	3	3	NT	T_cells	-0.0495184	0.0137956	G2M
ACTTCCGAGAGATCGC-1_1_1_1_1_1_1	NT1	3542	1187	6.80407	Singlet	0.00847458	3	3	NT	T_cells	0.0258112	-0.0381392	S
ACTTCCGAGCGATGGT-1_1_1_1_1_1_1	NT1	5020	1555	3.48606	Singlet	0.0536723	0	0	NT	T_cells	0.0293115	-0.0541121	S
ACTTCCGTCATTGTTC-1_1_1_1_1_1_1	NT1	1936	901	4.13223	Singlet	0.0112994	3	3	NT	T_cells	-0.0260123	-0.0106667	G1
ACTTCCGTCGGTCATA-1_1_1_1_1_1_1	NT1	14455	1845	1.97855	Singlet	0.262712	10	10	NT	NK_cells	0.00324787	-0.0499552	S
ACTTCGCAGAGACAAG-1_1_1_1_1_1_1	NT1	885	443	1.01695	Singlet	0	16	16	NT	Myeloid_cells	0.0402884	0.0391703	S
ACTTCGCAGGAGAGGC-1_1_1_1_1_1_1	NT1	1077	563	2.87837	Singlet	0.0141243	2	2	NT	Myeloid_cells	0.0262857	0.0171931	S
ACTTCGCTCATCTACT-1_1_1_1_1_1_1	NT1	886	613	5.86907	Singlet	0.0960452	14	14	NT	CAFs	0.0637017	-0.0872109	S
ACTTCGCTCTCAACGA-1_1_1_1_1_1_1	NT1	1258	622	23.7679	Singlet	0.19774	11	11	NT	Ductal_cells	-0.0452353	-0.0846701	G1
ACTTTCACACGCTGCA-1_1_1_1_1_1_1	NT1	4830	1709	5.36232	Singlet	0.361582	6	6	NT	Myeloid_cells	0.0233727	0.0246041	G2M
ACTTTCATCAGCACCG-1_1_1_1_1_1_1	NT1	1664	763	4.32692	Singlet	0.149718	4	4	NT	Myeloid_cells	0.0145061	-0.046743	S
ACTTTCATCCTCACTG-1_1_1_1_1_1_1	NT1	5995	2019	4.27023	Singlet	0.19774	3	3	NT	T_cells	-0.0227577	-0.0765089	G1
ACTTTGTAGCCGCTTG-1_1_1_1_1_1_1	NT1	1779	674	3.59753	Singlet	0.0988701	4	4	NT	Myeloid_cells	-0.0361757	-0.00901002	G1
ACTTTGTCACTACAGT-1_1_1_1_1_1_1	NT1	2187	1002	11.1568	Singlet	0.0423729	3	3	NT	T_cells	0.0630869	-0.00222194	S
ACTTTGTTCGCAATTG-1_1_1_1_1_1_1	NT1	723	459	5.80913	Singlet	0.0338983	9	9	NT	NK_cells	0.124461	0.0324243	S
ACTTTGTTCGCATTAG-1_1_1_1_1_1_1	NT1	6337	2130	8.55294	Singlet	0.355932	4	4	NT	Myeloid_cells	-0.0523602	-0.0320671	G1
AGAAATGGTAGGCTGA-1_1_1_1_1_1_1	NT1	1325	711	11.0189	Singlet	0.0903955	15	15	NT	B_cells	0.36003	-0.00580369	S
AGAACAACAAATTGGA-1_1_1_1_1_1_1	NT1	2913	1175	6.62547	Singlet	0.0141243	0	0	NT	T_cells	-0.047076	0.108227	G2M
AGAACAACATGACAGG-1_1_1_1_1_1_1	NT1	6749	1678	4.08949	Singlet	0.0734463	0	0	NT	T_cells	0.00589521	-0.00984401	S
AGAACCTCATCTTAGG-1_1_1_1_1_1_1	NT1	1122	595	5.25847	Singlet	0.0932203	4	4	NT	Myeloid_cells	-0.0296907	-0.0981813	G1
AGAACCTGTAACACGG-1_1_1_1_1_1_1	NT1	3857	1297	7.05211	Singlet	0.00847458	3	3	NT	T_cells	0.0142261	-0.0566263	S
AGAACCTGTTATCTGG-1_1_1_1_1_1_1	NT1	4679	1708	3.48365	Singlet	0.169492	8	8	NT	T_cells	-0.0254191	0.0826889	G2M
AGAACCTGTTGGGAAC-1_1_1_1_1_1_1	NT1	868	455	4.49309	Singlet	0	2	2	NT	Myeloid_cells	-0.0198927	0.0231919	G2M
AGAACCTTCAAGGCTT-1_1_1_1_1_1_1	NT1	1035	523	1.15942	Singlet	0.00564972	7	7	NT	Myeloid_cells	-0.0189567	-0.038008	G1
AGAACCTTCGCGGTAC-1_1_1_1_1_1_1	NT1	553	405	4.33996	Singlet	0.0564972	1	1	NT	Ductal_cells	0.037947	-0.0670034	S
AGAAGCGGTACCGTCG-1_1_1_1_1_1_1	NT1	1079	713	0.185357	Singlet	0.180791	22	22	NT	Ductal_cells	0.146525	-0.0125426	S
AGAAGCGGTTCTATCT-1_1_1_1_1_1_1	NT1	5178	1650	9.98455	Singlet	0.0338983	3	3	NT	T_cells	0.0145618	-0.00665238	S
AGAAGCGTCCACACCT-1_1_1_1_1_1_1	NT1	1025	545	5.17073	Singlet	0.0988701	4	4	NT	Myeloid_cells	-0.0183591	-0.0288865	G1
AGAAGTACAACGACAG-1_1_1_1_1_1_1	NT1	8813	2458	8.49881	Singlet	0.364407	14	14	NT	CAFs	0.00493832	-0.0825593	S
AGAAGTACACTCCACT-1_1_1_1_1_1_1	NT1	20153	908	2.40163	Singlet	0.265537	10	10	NT	NK_cells	-0.0153145	-0.0369465	G1
AGAAGTATCCAAGCTA-1_1_1_1_1_1_1	NT1	4119	1428	7.23477	Singlet	0.0310734	3	3	NT	T_cells	0.0165818	-0.018697	S
AGAAGTATCGGCTATA-1_1_1_1_1_1_1	NT1	4512	1462	7.15869	Singlet	0.0338983	3	3	NT	T_cells	0.0426624	-0.0804819	S
AGACAAACAGACCAGA-1_1_1_1_1_1_1	NT1	501	308	6.18762	Singlet	0.0310734	19	19	NT	Myeloid_cells	0.061068	-0.0405567	S
AGACAAAGTGGATCGA-1_1_1_1_1_1_1	NT1	942	479	7.96178	Singlet	0.0254237	0	0	NT	T_cells	-0.024976	-0.00887849	G1
AGACAAATCGTTCTCG-1_1_1_1_1_1_1	NT1	31543	2376	1.15081	Singlet	0.274011	10	10	NT	NK_cells	-0.0218884	-0.0330976	G1
AGACACTCATATGCGT-1_1_1_1_1_1_1	NT1	3287	1291	7.30149	Singlet	0.0254237	3	3	NT	T_cells	-0.0112666	-0.0197125	G1
AGACACTGTATTCCTT-1_1_1_1_1_1_1	NT1	6309	463	0.190204	Singlet	0.262712	10	10	NT	NK_cells	-0.0133675	-0.0360416	G1
AGACACTTCCGTGTGG-1_1_1_1_1_1_1	NT1	883	465	4.53001	Singlet	0	2	2	NT	Myeloid_cells	-0.0267095	-0.0222694	G1
AGACAGGAGGCCTAAG-1_1_1_1_1_1_1	NT1	6595	1807	9.17362	Singlet	0.251412	13	13	NT	B_cells	0.00935566	0.00771072	S
AGACAGGAGTGCAGCA-1_1_1_1_1_1_1	NT1	6709	493	0.0149054	Singlet	0.251412	10	10	NT	NK_cells	-0.0176496	-0.0177592	G1
AGACAGGCAAGTACCT-1_1_1_1_1_1_1	NT1	675	372	2.51852	Singlet	0.0480226	2	2	NT	Myeloid_cells	-0.0242232	0.0432054	G2M
AGACAGGCAGCTTTCC-1_1_1_1_1_1_1	NT1	11949	2167	6.14277	Singlet	0.299435	10	10	NT	NK_cells	0.00507373	-0.0793634	S
AGACAGGGTACAGTTC-1_1_1_1_1_1_1	NT1	7866	2356	4.55123	Singlet	0.372881	4	4	NT	Myeloid_cells	-0.0338614	-0.0824196	G1
AGACCATAGAGTCAGC-1_1_1_1_1_1_1	NT1	607	371	1.64745	Singlet	0.00847458	2	2	NT	Myeloid_cells	-0.0356802	-0.061466	G1
AGACCCGCAAATTGGA-1_1_1_1_1_1_1	NT1	6985	2164	7.65927	Singlet	0.370056	14	14	NT	CAFs	-0.0336349	0.0136803	G2M
AGACCCGCATGCAGCC-1_1_1_1_1_1_1	NT1	3565	1320	8.58345	Singlet	0.0169492	3	3	NT	T_cells	-0.0156048	0.041567	G2M
AGACCCGGTTTCACTT-1_1_1_1_1_1_1	NT1	564	390	3.01418	Singlet	0.0423729	21	21	NT	Others	-0.0357888	-0.0480716	G1
AGACCCGTCCATCAGA-1_1_1_1_1_1_1	NT1	3589	1278	6.91	Singlet	0.0112994	3	3	NT	T_cells	0.0565613	0.0896331	G2M
AGACCCGTCCTTGGAA-1_1_1_1_1_1_1	NT1	1297	764	7.3246	Singlet	0.101695	1	1	NT	Ductal_cells	-0.0451711	-0.0526966	G1
AGACTCAAGGCATCGA-1_1_1_1_1_1_1	NT1	4183	1480	6.21563	Singlet	0.0282486	3	3	NT	T_cells	-0.0496768	-0.0304879	G1
AGACTCACACCCTATC-1_1_1_1_1_1_1	NT1	4354	1618	3.49104	Singlet	0.115819	8	8	NT	T_cells	0.0154423	0.00879624	S
AGACTCATCAGACAAA-1_1_1_1_1_1_1	NT1	1368	680	4.82456	Singlet	0.0112994	7	7	NT	Myeloid_cells	-0.0329837	-0.022654	G1
AGACTCATCCACACAA-1_1_1_1_1_1_1	NT1	7562	1592	2.81672	Singlet	0.293785	10	10	NT	NK_cells	-0.0070068	-0.0855101	G1
AGAGAATAGCGTATGG-1_1_1_1_1_1_1	NT1	669	440	2.69058	Singlet	0.0480226	4	4	NT	Myeloid_cells	-0.0235492	-0.05861	G1
AGAGAATAGTTGGAAT-1_1_1_1_1_1_1	NT1	1548	736	4.90956	Singlet	0.0621469	7	7	NT	Myeloid_cells	-0.0425466	0.0568455	G2M
AGAGAATTCAGGTAAA-1_1_1_1_1_1_1	NT1	3542	1242	10.7566	Singlet	0.0112994	3	3	NT	T_cells	0.0313996	-0.0139432	S
AGAGAATTCTAGGCCG-1_1_1_1_1_1_1	NT1	8565	730	8.67484	Singlet	0.265537	10	10	NT	NK_cells	0.0162447	-0.0275573	S
AGAGAGCAGTATGACA-1_1_1_1_1_1_1	NT1	7315	1542	3.41763	Singlet	0.0508475	0	0	NT	T_cells	0.0638029	-0.0321379	S
AGAGAGCGTCCACATA-1_1_1_1_1_1_1	NT1	5069	1522	2.18978	Singlet	0.0819209	9	9	NT	NK_cells	0.072073	0.0530375	S
AGAGAGCGTTGGAGAC-1_1_1_1_1_1_1	NT1	6178	1960	5.90806	Singlet	0.361582	6	6	NT	Myeloid_cells	0.0155981	-0.0764379	S
AGAGCAGCACAGCGCT-1_1_1_1_1_1_1	NT1	4057	1537	3.42618	Singlet	0.0903955	3	3	NT	T_cells	0.0573838	-0.0220886	S
AGAGCAGCAGCGTGAA-1_1_1_1_1_1_1	NT1	1548	787	4.39276	Singlet	0.101695	9	9	NT	NK_cells	0.0487089	-0.084734	S
AGAGCAGTCATCCTGC-1_1_1_1_1_1_1	NT1	1229	632	5.77705	Singlet	0.0677966	1	1	NT	Ductal_cells	-0.0270925	0.008436	G2M
AGAGCCCGTATGAAAC-1_1_1_1_1_1_1	NT1	5843	1943	9.39586	Singlet	0.341808	14	14	NT	CAFs	-0.0406207	-0.0837728	G1
AGATAGAAGCGATGCA-1_1_1_1_1_1_1	NT1	3692	1364	7.28602	Singlet	0.251412	20	20	NT	Ductal_cells	-0.0605124	1.06425	G2M
AGATAGATCTATCCAT-1_1_1_1_1_1_1	NT1	518	332	1.35135	Singlet	0	7	7	NT	Myeloid_cells	-0.014841	0.0131774	G2M
AGATAGATCTCTTGCG-1_1_1_1_1_1_1	NT1	1257	680	2.94352	Singlet	0.0451977	7	7	NT	Myeloid_cells	0.017553	0.0219024	G2M
AGATCCAAGAGTTGCG-1_1_1_1_1_1_1	NT1	8153	494	1.22654	Singlet	0.262712	10	10	NT	NK_cells	-0.0136865	-0.0302928	G1
AGATCCAAGGGCAGAG-1_1_1_1_1_1_1	NT1	779	434	2.31065	Singlet	0	7	7	NT	Myeloid_cells	-0.031162	0.0511283	G2M
AGATCGTGTAAGATTG-1_1_1_1_1_1_1	NT1	4689	1967	4.49989	Singlet	0.347458	17	17	NT	NK_cells	-0.027875	-0.10265	G1
AGATCGTGTGTACATC-1_1_1_1_1_1_1	NT1	3855	1206	6.07004	Singlet	0.00564972	3	3	NT	T_cells	0.00672685	0.0505052	G2M
AGATGAACAAAGGCTG-1_1_1_1_1_1_1	NT1	18427	787	0.336463	Singlet	0.257062	10	10	NT	NK_cells	-0.013072	-0.0340422	G1
AGATGAAGTTAGAGAT-1_1_1_1_1_1_1	NT1	3444	1206	5.34262	Singlet	0.019774	3	3	NT	T_cells	-0.000829287	-0.0271053	G1
AGATGAATCAAGCCAT-1_1_1_1_1_1_1	NT1	7030	2354	17.2831	Singlet	0.305085	22	22	NT	Ductal_cells	-0.0725317	-0.0522654	G1
AGATGAATCAGCTAGT-1_1_1_1_1_1_1	NT1	1220	641	1.47541	Singlet	0.039548	7	7	NT	Myeloid_cells	-0.0195324	0.057999	G2M
AGATGCTAGCGATGGT-1_1_1_1_1_1_1	NT1	4948	1894	4.83023	Singlet	0.381356	4	4	NT	Myeloid_cells	-0.0414983	-0.0373344	G1
AGATGCTAGTGCCTCG-1_1_1_1_1_1_1	NT1	3429	357	2.21639	Singlet	0.248588	10	10	NT	NK_cells	-0.0193587	-0.0398485	G1
AGATGCTCAGCACAGA-1_1_1_1_1_1_1	NT1	1158	608	17.1848	Singlet	0.152542	1	1	NT	Ductal_cells	0.00356894	-0.00183569	S
AGATGCTCATTGACCA-1_1_1_1_1_1_1	NT1	669	389	1.19581	Singlet	0.00847458	7	7	NT	Myeloid_cells	-0.0395757	0.0864348	G2M
AGATGCTGTCGATGCC-1_1_1_1_1_1_1	NT1	3994	1320	6.76014	Singlet	0.0141243	3	3	NT	T_cells	-0.00112665	0.021859	G2M
AGCATCAAGCCTCACG-1_1_1_1_1_1_1	NT1	3445	1275	6.7344	Singlet	0.0112994	3	3	NT	T_cells	0.020723	0.0192843	S
AGCATCACATCAGCGC-1_1_1_1_1_1_1	NT1	13400	700	0.11194	Singlet	0.265537	10	10	NT	NK_cells	-0.000968985	-0.0383295	G1
AGCATCATCCCTAGGG-1_1_1_1_1_1_1	NT1	4471	1590	5.56922	Singlet	0.161017	9	9	NT	NK_cells	0.0293772	0.0919753	G2M
AGCATCATCGTGTGAT-1_1_1_1_1_1_1	NT1	841	483	1.9025	Singlet	0	2	2	NT	Myeloid_cells	0.0335816	0.0260443	S
AGCCAATAGACCCGCT-1_1_1_1_1_1_1	NT1	1665	625	0.12012	Singlet	0.144068	24	24	NT	Others	-0.0421057	-0.0704298	G1
AGCCAATTCATATGGC-1_1_1_1_1_1_1	NT1	4907	1555	5.44121	Singlet	0.0112994	3	3	NT	T_cells	0.0662801	-0.0672527	S
AGCCAATTCTCTCGAC-1_1_1_1_1_1_1	NT1	1773	788	16.018	Singlet	0.0480226	0	0	NT	T_cells	-0.0384627	-0.0338702	G1
AGCCACGCAGAACTAA-1_1_1_1_1_1_1	NT1	4622	1690	6.23107	Singlet	0.358757	6	6	NT	Myeloid_cells	-0.0437691	-0.0595827	G1
AGCCACGCATTCACCC-1_1_1_1_1_1_1	NT1	2333	1209	10.8873	Singlet	0.237288	20	20	NT	Ductal_cells	0.0256595	0.161461	G2M
AGCCACGGTCACTACA-1_1_1_1_1_1_1	NT1	1380	663	6.44928	Singlet	0.0169492	0	0	NT	T_cells	-0.0233986	0.0111852	G2M
AGCCACGGTGCCTAAT-1_1_1_1_1_1_1	NT1	1131	576	1.59151	Singlet	0.00847458	7	7	NT	Myeloid_cells	-0.02615	0.108333	G2M
AGCCACGGTTCGCGTG-1_1_1_1_1_1_1	NT1	717	404	6.13668	Singlet	0.039548	14	14	NT	CAFs	-0.0187297	-0.0607232	G1
AGCCACGTCTGTCGTC-1_1_1_1_1_1_1	NT1	5192	1395	5.8359	Singlet	0.0169492	0	0	NT	T_cells	-0.0193887	-0.0872591	G1
AGCCAGCAGAGATCGC-1_1_1_1_1_1_1	NT1	5831	1813	6.75699	Singlet	0.353107	6	6	NT	Myeloid_cells	-0.0546685	-0.0626788	G1
AGCCAGCAGGTGAGAA-1_1_1_1_1_1_1	NT1	1957	1002	8.27798	Singlet	0.19774	20	20	NT	Ductal_cells	-0.0200069	-0.0714022	G1
AGCCAGCCAGTCTCTC-1_1_1_1_1_1_1	NT1	4266	1402	6.98547	Singlet	0.019774	3	3	NT	T_cells	-0.0193755	0.0261015	G2M
AGCCAGCGTTAGTCGT-1_1_1_1_1_1_1	NT1	6775	737	0.0147601	Singlet	0.259887	10	10	NT	NK_cells	-0.0183201	-0.0578661	G1
AGCCAGCTCATTGAGC-1_1_1_1_1_1_1	NT1	5679	1774	6.90262	Singlet	0.367232	6	6	NT	Myeloid_cells	0.00289702	-0.0648759	S
AGCGATTCAATAACCC-1_1_1_1_1_1_1	NT1	2718	497	0.367918	Singlet	0.144068	24	24	NT	Others	-0.0212536	-0.053733	G1
AGCGATTCATCCGGCA-1_1_1_1_1_1_1	NT1	8152	2444	6.4524	Singlet	0.384181	14	14	NT	CAFs	-0.0415832	-0.022602	G1
AGCGATTTCAAGGAGC-1_1_1_1_1_1_1	NT1	4760	1804	5.79832	Singlet	0.20904	8	8	NT	T_cells	-0.00282383	-0.0830422	G1
AGCGCCAAGGTCACCC-1_1_1_1_1_1_1	NT1	11945	564	0.0669736	Singlet	0.248588	10	10	NT	NK_cells	0.00416669	-0.0300319	S
AGCGCCAGTAGCGCCT-1_1_1_1_1_1_1	NT1	2457	925	7.16321	Singlet	0.166667	13	13	NT	B_cells	-0.0073795	0.0122013	G2M
AGCGCCATCAAATGCC-1_1_1_1_1_1_1	NT1	3665	1418	3.92906	Singlet	0.0254237	8	8	NT	T_cells	0.0475982	-0.0356995	S
AGCGCCATCTAGACCA-1_1_1_1_1_1_1	NT1	792	405	11.1111	Singlet	0.00282486	2	2	NT	Myeloid_cells	-0.0100602	-0.0128122	G1
AGCGCTGAGGTGCCTC-1_1_1_1_1_1_1	NT1	1645	927	7.90274	Singlet	0.214689	11	11	NT	Ductal_cells	-0.000205711	-0.0690246	G1
AGCGCTGAGTAGAATC-1_1_1_1_1_1_1	NT1	8264	2328	5.21539	Singlet	0.211864	3	3	NT	T_cells	0.0839004	-0.064897	S
AGCGCTGCACCACATA-1_1_1_1_1_1_1	NT1	5151	394	0.174723	Singlet	0.262712	10	10	NT	NK_cells	-0.0127851	-0.0284643	G1
AGCGCTGCAGGTTCGC-1_1_1_1_1_1_1	NT1	7365	2327	12.0434	Singlet	0.372881	14	14	NT	CAFs	-0.0258354	-0.0376926	G1
AGCGTATAGCGGATCA-1_1_1_1_1_1_1	NT1	1591	808	7.29101	Singlet	0.127119	1	1	NT	Ductal_cells	-0.0405388	-0.0679529	G1
AGCGTATAGCTTTCCC-1_1_1_1_1_1_1	NT1	5424	2015	2.83923	Singlet	0.330508	21	21	NT	Others	-0.0936608	-0.0725141	G1
AGCGTCGAGAGATCGC-1_1_1_1_1_1_1	NT1	1378	645	1.30624	Singlet	0.0536723	7	7	NT	Myeloid_cells	-0.0380757	-0.00897161	G1
AGCGTCGGTTTGATCG-1_1_1_1_1_1_1	NT1	3572	1417	10.6103	Singlet	0.0536723	3	3	NT	T_cells	-0.0236045	0.0117666	G2M
AGCGTCGTCATCTCTA-1_1_1_1_1_1_1	NT1	4067	1599	11.8269	Singlet	0.353107	14	14	NT	CAFs	-0.0359089	-0.028607	G1
AGCGTCGTCCACATAG-1_1_1_1_1_1_1	NT1	5542	1971	14.0563	Singlet	0.364407	22	22	NT	Ductal_cells	-0.0384845	-0.0651361	G1
AGCTACAAGAAGGCTC-1_1_1_1_1_1_1	NT1	770	447	7.01299	Singlet	0.0706215	14	14	NT	CAFs	-0.0197518	-0.0133431	G1
AGCTACAAGCGACAGT-1_1_1_1_1_1_1	NT1	3273	1297	4.12466	Singlet	0.0225989	8	8	NT	T_cells	0.0144431	0.0640341	G2M
AGCTACAAGGTGCGAT-1_1_1_1_1_1_1	NT1	3414	1243	7.46924	Singlet	0.0141243	3	3	NT	T_cells	-0.0432238	-0.0383005	G1
AGCTACACATTGGATC-1_1_1_1_1_1_1	NT1	704	390	4.6875	Singlet	0.00282486	7	7	NT	Myeloid_cells	-0.0171754	-0.0480511	G1
AGCTACATCGGCTCTT-1_1_1_1_1_1_1	NT1	9677	729	1.70507	Singlet	0.265537	10	10	NT	NK_cells	-0.0234239	-0.0452706	G1
AGCTCAAAGACTCTTG-1_1_1_1_1_1_1	NT1	4062	1654	13.4417	Singlet	0.341808	14	14	NT	CAFs	-0.0539075	-0.104391	G1
AGCTCAAGTAGAATAC-1_1_1_1_1_1_1	NT1	3960	1454	3.56061	Singlet	0.039548	3	3	NT	T_cells	0.0450402	-0.084874	S
AGCTCAAGTCTCCTGT-1_1_1_1_1_1_1	NT1	6910	2115	4.80463	Singlet	0.200565	3	3	NT	T_cells	-0.0267376	-0.00681468	G1
AGCTCAATCAAGAGTA-1_1_1_1_1_1_1	NT1	4361	1509	7.86517	Singlet	0.0508475	3	3	NT	T_cells	0.0746003	-0.0646105	S
AGCTCAATCCTTGACC-1_1_1_1_1_1_1	NT1	2988	1163	10.3748	Singlet	0.00564972	0	0	NT	T_cells	0.0329103	-0.0683825	S
AGCTTCCAGCCTCGAT-1_1_1_1_1_1_1	NT1	655	450	9.77099	Singlet	0.059322	22	22	NT	Ductal_cells	-0.0375556	-0.0161077	G1
AGCTTCCAGCCTCTGG-1_1_1_1_1_1_1	NT1	1828	1058	7.05689	Singlet	0.231638	20	20	NT	Ductal_cells	-0.0658061	0.0302981	G2M
AGCTTCCGTCTGTGCG-1_1_1_1_1_1_1	NT1	7465	2267	4.44742	Singlet	0.322034	14	14	NT	CAFs	-0.0487169	-0.0895298	G1
AGGAAATCACAGCCAC-1_1_1_1_1_1_1	NT1	2191	898	8.16979	Singlet	0.079096	7	7	NT	Myeloid_cells	-0.0437133	0.13439	G2M
AGGAAATCATATGGCT-1_1_1_1_1_1_1	NT1	8861	2039	5.75556	Singlet	0.344633	19	19	NT	Myeloid_cells	-0.0462687	-0.0557824	G1
AGGAAATCATTCTGTT-1_1_1_1_1_1_1	NT1	7097	2003	4.15669	Singlet	0.333333	4	4	NT	Myeloid_cells	-0.00468441	-0.0570699	G1
AGGAAATGTTTGGCTA-1_1_1_1_1_1_1	NT1	1533	754	1.50033	Singlet	0.0734463	7	7	NT	Myeloid_cells	-0.0368271	0.0668131	G2M
AGGAAATTCCATTGTT-1_1_1_1_1_1_1	NT1	6031	437	0.066324	Singlet	0.251412	10	10	NT	NK_cells	-0.0160927	-0.0351767	G1
AGGAAATTCGATACAC-1_1_1_1_1_1_1	NT1	2280	1067	20.5263	Singlet	0.254237	14	14	NT	CAFs	-0.058712	-0.0214904	G1
AGGAATAAGGACGCAT-1_1_1_1_1_1_1	NT1	1682	775	6.77765	Singlet	0.146893	13	13	NT	B_cells	-0.0528932	-0.0177615	G1
AGGAATAGTTTCCCAC-1_1_1_1_1_1_1	NT1	4621	1540	6.34062	Singlet	0.0508475	3	3	NT	T_cells	0.0914165	-0.0574175	S
AGGAATATCAAACGTC-1_1_1_1_1_1_1	NT1	5133	2015	6.23417	Singlet	0.228814	21	21	NT	Others	-0.072624	0.0255516	G2M
AGGACGACAGCAGGAT-1_1_1_1_1_1_1	NT1	517	335	3.48162	Singlet	0.00564972	2	2	NT	Myeloid_cells	-0.0259876	0.0161271	G2M
AGGACGAGTAATGATG-1_1_1_1_1_1_1	NT1	3207	1319	4.802	Singlet	0.0734463	3	3	NT	T_cells	-0.048001	-0.047133	G1
AGGACGAGTAGAGGAA-1_1_1_1_1_1_1	NT1	1248	651	8.49359	Singlet	0.155367	1	1	NT	Ductal_cells	-0.0323334	0.0146669	G2M
AGGACGAGTTACACTG-1_1_1_1_1_1_1	NT1	2882	1087	5.17002	Singlet	0.336158	6	6	NT	Myeloid_cells	-0.00443657	0.00837469	G2M
AGGACGAGTTGGTACT-1_1_1_1_1_1_1	NT1	3625	1383	4.38621	Singlet	0.0282486	8	8	NT	T_cells	0.0214069	0.0269631	G2M
AGGACTTAGCCGATCC-1_1_1_1_1_1_1	NT1	2829	1163	2.89855	Singlet	0.00847458	3	3	NT	T_cells	-0.0125076	-0.0472371	G1
AGGACTTGTTGCGGCT-1_1_1_1_1_1_1	NT1	626	398	2.71565	Singlet	0.0762712	1	1	NT	Ductal_cells	-0.0318139	-0.0622689	G1
AGGACTTTCCGAAATC-1_1_1_1_1_1_1	NT1	3149	1308	17.0213	Singlet	0.288136	14	14	NT	CAFs	-0.0289017	-0.0724302	G1
AGGAGGTCAGCCATTA-1_1_1_1_1_1_1	NT1	4077	1395	5.71499	Singlet	0.0112994	3	3	NT	T_cells	0.0392543	-0.0379588	S
AGGATAAGTAACGTTC-1_1_1_1_1_1_1	NT1	525	318	4.95238	Singlet	0.0621469	4	4	NT	Myeloid_cells	-0.0207314	-0.0529439	G1
AGGATAAGTGATCATC-1_1_1_1_1_1_1	NT1	1552	731	1.86856	Singlet	0.0564972	2	2	NT	Myeloid_cells	-0.0341632	0.0676665	G2M
AGGATAAGTTGCATTG-1_1_1_1_1_1_1	NT1	3400	1302	5.44118	Singlet	0.0536723	8	8	NT	T_cells	-0.0202639	-0.0485328	G1
AGGATAATCAATGTCG-1_1_1_1_1_1_1	NT1	4479	1551	6.40768	Singlet	0.0536723	8	8	NT	T_cells	0.011157	-0.0634282	S
AGGATAATCGATGGAG-1_1_1_1_1_1_1	NT1	4815	1433	7.91277	Singlet	0.20904	13	13	NT	B_cells	-0.0537909	-0.0670203	G1
AGGATCTCAAATGGCG-1_1_1_1_1_1_1	NT1	1362	729	10.9398	Singlet	0.110169	23	23	NT	T_cells	0.190991	0.406872	G2M
AGGATCTGTCGAGTGA-1_1_1_1_1_1_1	NT1	941	534	1.70032	Singlet	0.0141243	2	2	NT	Myeloid_cells	-0.0340552	-0.0226621	G1
AGGCCACAGGGTTGCA-1_1_1_1_1_1_1	NT1	3804	1358	2.89169	Singlet	0.118644	9	9	NT	NK_cells	-0.0230075	-0.012355	G1
AGGCCACCAACAGCCC-1_1_1_1_1_1_1	NT1	5854	1810	4.18517	Singlet	0.358757	6	6	NT	Myeloid_cells	-0.062802	-0.106953	G1
AGGCCACCAGGCGTTC-1_1_1_1_1_1_1	NT1	4396	1539	5.27753	Singlet	0.0480226	8	8	NT	T_cells	0.00321924	-0.0498358	S
AGGCTGCAGGCGAAGG-1_1_1_1_1_1_1	NT1	1871	905	2.45858	Singlet	0.0734463	7	7	NT	Myeloid_cells	-0.0411967	-0.030082	G1
AGGCTGCCAGCCCACA-1_1_1_1_1_1_1	NT1	5273	381	0.113787	Singlet	0.248588	10	10	NT	NK_cells	-0.00971055	-0.0390302	G1
AGGCTGCGTAGTCTGT-1_1_1_1_1_1_1	NT1	913	578	12.9244	Singlet	0.115819	20	20	NT	Ductal_cells	-0.047462	-0.0364456	G1
AGGCTGCGTATGCTTG-1_1_1_1_1_1_1	NT1	4785	1472	4.05434	Singlet	0.0141243	3	3	NT	T_cells	-0.0465799	-0.0989383	G1
AGGCTGCGTCTTCATT-1_1_1_1_1_1_1	NT1	1030	592	2.23301	Singlet	0.019774	7	7	NT	Myeloid_cells	-0.0365228	0.0357477	G2M
AGGGAGTAGGATTTGA-1_1_1_1_1_1_1	NT1	2058	934	7.92031	Singlet	0.00564972	0	0	NT	T_cells	0.00163615	0.0153756	G2M
AGGGAGTCAAACGAGC-1_1_1_1_1_1_1	NT1	3591	1356	4.73406	Singlet	0.0254237	3	3	NT	T_cells	-0.0157894	-0.0654287	G1
AGGGAGTGTGCATGTT-1_1_1_1_1_1_1	NT1	4084	1469	5.48482	Singlet	0.039548	3	3	NT	T_cells	0.0419454	-0.00455058	S
AGGGCCTAGCGGACAT-1_1_1_1_1_1_1	NT1	639	410	5.94679	Singlet	0.039548	21	21	NT	Others	-0.0194694	-0.0202967	G1
AGGGCCTGTGTCCACG-1_1_1_1_1_1_1	NT1	5267	1785	6.07556	Singlet	0.367232	6	6	NT	Myeloid_cells	-0.00638072	-0.056505	G1
AGGGCCTGTTCAGCTA-1_1_1_1_1_1_1	NT1	1132	553	1.41343	Singlet	0.0169492	16	16	NT	Myeloid_cells	-0.0183243	-0.0252432	G1
AGGGCCTTCTGAGCAT-1_1_1_1_1_1_1	NT1	4252	1259	4.93885	Singlet	0.330508	6	6	NT	Myeloid_cells	-0.0377782	-0.0621474	G1
AGGGCTCAGTATTGCC-1_1_1_1_1_1_1	NT1	11514	866	0.0434254	Singlet	0.271186	10	10	NT	NK_cells	-0.0285019	-0.0522391	G1
AGGGCTCGTCAAGGCA-1_1_1_1_1_1_1	NT1	3102	1145	6.15732	Singlet	0.0141243	3	3	NT	T_cells	0.0454092	-0.0683716	S
AGGGCTCTCGTAGTCA-1_1_1_1_1_1_1	NT1	2483	857	7.20902	Singlet	0.180791	1	1	NT	Ductal_cells	-0.0275	-0.0908048	G1
AGGGTCCCACAAGTGG-1_1_1_1_1_1_1	NT1	1899	951	2.05371	Singlet	0.0819209	7	7	NT	Myeloid_cells	-0.0484697	0.0350221	G2M
AGGGTCCCACTACAGT-1_1_1_1_1_1_1	NT1	866	482	7.73672	Singlet	0.059322	4	4	NT	Myeloid_cells	0.0374849	-0.0683705	S
AGGGTGAAGCGCCTAC-1_1_1_1_1_1_1	NT1	7584	2268	5.19515	Singlet	0.242938	8	8	NT	T_cells	0.0607046	-0.00865184	S
AGGGTGACAAATGGAT-1_1_1_1_1_1_1	NT1	710	413	6.90141	Singlet	0.059322	5	5	NT	Myeloid_cells	-0.00876635	-0.0517454	G1
AGGGTGACAGACGGAT-1_1_1_1_1_1_1	NT1	3120	1175	6.95513	Singlet	0.00847458	8	8	NT	T_cells	0.0355211	-0.0166589	S
AGGGTGATCTTGTTAC-1_1_1_1_1_1_1	NT1	528	308	4.35606	Singlet	0.0169492	2	2	NT	Myeloid_cells	-0.0239711	-0.0376312	G1
AGGGTTTCACCCTAAA-1_1_1_1_1_1_1	NT1	5243	1477	6.33225	Singlet	0.217514	13	13	NT	B_cells	0.0335348	-0.0725304	S
AGGGTTTCATGTTCAG-1_1_1_1_1_1_1	NT1	1624	777	11.5764	Singlet	0.0112994	3	3	NT	T_cells	0.00235773	0.117315	G2M
AGGGTTTGTCACGCTG-1_1_1_1_1_1_1	NT1	6085	383	0	Singlet	0.251412	10	10	NT	NK_cells	0.0128406	-0.0301642	S
AGGGTTTGTCTGTGGC-1_1_1_1_1_1_1	NT1	3769	434	0.23879	Singlet	0.265537	10	10	NT	NK_cells	-0.0135039	-0.0338229	G1
AGGGTTTTCACTACTT-1_1_1_1_1_1_1	NT1	1890	842	1.95767	Singlet	0.079096	7	7	NT	Myeloid_cells	0.0161448	9.62452e-05	S
AGGTAGGTCAGAGTTC-1_1_1_1_1_1_1	NT1	5985	1966	6.533	Singlet	0.231638	3	3	NT	T_cells	-0.0145837	-0.0588256	G1
AGGTAGGTCGGAAACG-1_1_1_1_1_1_1	NT1	3628	1533	3.19735	Singlet	0.310734	21	21	NT	Others	0.0354423	-0.0998496	S
AGGTCATAGCTTCATG-1_1_1_1_1_1_1	NT1	629	343	3.81558	Singlet	0	2	2	NT	Myeloid_cells	-0.0156777	0.0866449	G2M
AGGTCATGTCTGCGCA-1_1_1_1_1_1_1	NT1	2007	1179	9.86547	Singlet	0.279661	20	20	NT	Ductal_cells	0.067997	0.763797	G2M
AGGTCATTCACTGGTA-1_1_1_1_1_1_1	NT1	1547	770	3.87847	Singlet	0.0706215	7	7	NT	Myeloid_cells	-0.0378589	0.0288027	G2M
AGGTCTAAGACGCAGT-1_1_1_1_1_1_1	NT1	5417	1475	8.45486	Singlet	0.20339	13	13	NT	B_cells	0.00285126	-0.0671169	S
AGGTCTACACTTTATC-1_1_1_1_1_1_1	NT1	5346	1966	2.6936	Singlet	0.242938	17	17	NT	NK_cells	0.0619283	0.0380407	S
AGGTCTATCGATAACC-1_1_1_1_1_1_1	NT1	4535	1632	7.45314	Singlet	0.350282	6	6	NT	Myeloid_cells	0.000287195	-0.0265428	S
AGGTCTATCGTCAAAC-1_1_1_1_1_1_1	NT1	3895	1643	3.97946	Singlet	0.254237	9	9	NT	NK_cells	0.0362969	-0.0856975	S
AGGTGTTAGGAAAGAC-1_1_1_1_1_1_1	NT1	1299	602	0.846805	Singlet	0.0141243	2	2	NT	Myeloid_cells	-0.0313755	0.00498059	G2M
AGGTGTTCAGGCTATT-1_1_1_1_1_1_1	NT1	1065	534	1.40845	Singlet	0.0112994	2	2	NT	Myeloid_cells	-0.0281966	0.0184657	G2M
AGGTGTTTCTGAATGC-1_1_1_1_1_1_1	NT1	5209	1820	5.22173	Singlet	0.262712	9	9	NT	NK_cells	0.0287729	-0.0297023	S
AGGTTACTCCGGGACT-1_1_1_1_1_1_1	NT1	4121	1445	4.65906	Singlet	0.0254237	3	3	NT	T_cells	0.00535061	-0.0161268	S
AGGTTACTCGTTCTAT-1_1_1_1_1_1_1	NT1	3868	1644	4.44674	Singlet	0.276836	9	9	NT	NK_cells	0.0178804	-0.0160334	S
AGGTTGTGTTATAGCC-1_1_1_1_1_1_1	NT1	2886	1187	4.9203	Singlet	0.0112994	3	3	NT	T_cells	0.0309897	0.00132997	S
AGGTTGTTCTGTGCAA-1_1_1_1_1_1_1	NT1	3406	1197	3.55255	Singlet	0.0112994	3	3	NT	T_cells	0.0582966	-0.0221611	S
AGTACCAAGCACACAG-1_1_1_1_1_1_1	NT1	1123	579	0.801425	Singlet	0.0225989	2	2	NT	Myeloid_cells	0.0320394	0.0173793	S
AGTACCAAGTACCGGA-1_1_1_1_1_1_1	NT1	4166	1439	7.32117	Singlet	0.0225989	3	3	NT	T_cells	0.0719194	-0.0822185	S
AGTACCAGTGACTGTT-1_1_1_1_1_1_1	NT1	2549	1076	5.8062	Singlet	0.00564972	8	8	NT	T_cells	-0.0165257	0.00791819	G2M
AGTACCAGTTGACGGA-1_1_1_1_1_1_1	NT1	1999	949	5.35268	Singlet	0.194915	4	4	NT	Myeloid_cells	-0.0329424	-0.0112309	G1
AGTACCATCACTGGGC-1_1_1_1_1_1_1	NT1	521	349	10.1727	Singlet	0.0451977	5	5	NT	Myeloid_cells	-0.0166657	0.00310951	G2M
AGTACCATCATGGTAC-1_1_1_1_1_1_1	NT1	1298	573	4.46841	Singlet	0.0903955	6	6	NT	Myeloid_cells	0.0247644	-0.0421128	S
AGTACCATCTTGTGCC-1_1_1_1_1_1_1	NT1	1187	518	4.38079	Singlet	0.0169492	2	2	NT	Myeloid_cells	-0.0207331	0.0268862	G2M
AGTACTGAGCGATTCT-1_1_1_1_1_1_1	NT1	5220	1474	7.85441	Singlet	0.0508475	12	12	NT	T_cells	0.017073	-0.0629387	S
AGTACTGAGGACTATA-1_1_1_1_1_1_1	NT1	776	365	13.5309	Singlet	0.0706215	6	6	NT	Myeloid_cells	-0.0259364	-0.00587329	G1
AGTACTGAGGAGATAG-1_1_1_1_1_1_1	NT1	6105	1836	7.27273	Singlet	0.30226	14	14	NT	CAFs	-0.0709583	-0.0492603	G1
AGTACTGAGGCTGTAG-1_1_1_1_1_1_1	NT1	6225	2010	5.54217	Singlet	0.200565	3	3	NT	T_cells	-0.0054159	-0.0383771	G1
AGTACTGGTGCCCTTT-1_1_1_1_1_1_1	NT1	6372	1886	9.30634	Singlet	0.370056	4	4	NT	Myeloid_cells	-0.058527	-0.0208121	G1
AGTACTGGTGTCTAAC-1_1_1_1_1_1_1	NT1	3761	1406	6.08881	Singlet	0.0282486	3	3	NT	T_cells	0.0848741	-0.00998339	S
AGTAGCTCAAACCACT-1_1_1_1_1_1_1	NT1	3858	1296	8.7351	Singlet	0.00282486	3	3	NT	T_cells	-0.0449853	-0.0593339	G1
AGTAGCTCAACAGATA-1_1_1_1_1_1_1	NT1	3931	1352	6.13076	Singlet	0.0254237	3	3	NT	T_cells	0.0121698	-0.0427164	S
AGTAGCTGTTTCCAAG-1_1_1_1_1_1_1	NT1	2447	909	12.546	Singlet	0.282486	6	6	NT	Myeloid_cells	-0.0519281	-0.0588411	G1
AGTAGCTTCGCTACAA-1_1_1_1_1_1_1	NT1	27339	972	0.0182889	Singlet	0.259887	10	10	NT	NK_cells	-0.00840814	-0.0294935	G1
AGTAGTCAGCATTGAA-1_1_1_1_1_1_1	NT1	2961	1301	12.9686	Singlet	0.274011	11	11	NT	Ductal_cells	-0.0621464	-0.0647458	G1
AGTAGTCCAAAGTGTA-1_1_1_1_1_1_1	NT1	3943	1342	6.01065	Singlet	0.0621469	17	17	NT	NK_cells	-0.0238036	0.0268683	G2M
AGTAGTCCAGGTCCCA-1_1_1_1_1_1_1	NT1	3559	1461	4.60804	Singlet	0.155367	17	17	NT	NK_cells	-0.0345339	-0.0283911	G1
AGTAGTCGTGGACCTC-1_1_1_1_1_1_1	NT1	3793	1293	14.5531	Singlet	0.0225989	3	3	NT	T_cells	-0.0130304	-0.0137124	G1
AGTCAACGTACCGTGC-1_1_1_1_1_1_1	NT1	1394	699	7.31707	Singlet	0.0536723	4	4	NT	Myeloid_cells	-0.0484147	-0.087782	G1
AGTCAACGTGCCTAAT-1_1_1_1_1_1_1	NT1	4384	1504	5.08668	Singlet	0.0225989	3	3	NT	T_cells	0.0435284	0.0101978	S
AGTCAACGTTTCCAAG-1_1_1_1_1_1_1	NT1	4135	1586	4.74002	Singlet	0.169492	3	3	NT	T_cells	0.00899867	-0.0357751	S
AGTCACAAGCAGTAAT-1_1_1_1_1_1_1	NT1	8862	2483	4.23155	Singlet	0.265537	17	17	NT	NK_cells	-0.0114805	-0.0319891	G1
AGTCACACAGAACTCT-1_1_1_1_1_1_1	NT1	5048	1864	3.16957	Singlet	0.228814	9	9	NT	NK_cells	0.0273059	0.01998	S
AGTCACAGTCCAATCA-1_1_1_1_1_1_1	NT1	1384	701	1.22832	Singlet	0.0649718	7	7	NT	Myeloid_cells	-0.034116	0.0221942	G2M
AGTCACAGTCCCTGTT-1_1_1_1_1_1_1	NT1	4548	1585	7.45383	Singlet	0.350282	6	6	NT	Myeloid_cells	-0.0327229	-0.0458953	G1
AGTCACATCCAGTTCC-1_1_1_1_1_1_1	NT1	1200	605	0.333333	Singlet	0.019774	2	2	NT	Myeloid_cells	-0.0326773	-0.0327323	G1
AGTCACATCGACGATT-1_1_1_1_1_1_1	NT1	579	372	12.7807	Singlet	0.0367232	18	18	NT	T_cells	-0.0214811	0.0914166	G2M
AGTCACATCTCGTCGT-1_1_1_1_1_1_1	NT1	1016	564	1.08268	Singlet	0.019774	2	2	NT	Myeloid_cells	-0.0263993	0.00672681	G2M
AGTCATGCACAAATCC-1_1_1_1_1_1_1	NT1	3298	1148	12.826	Singlet	0.00564972	0	0	NT	T_cells	0.0291604	-0.0507227	S
AGTCATGTCATTACGG-1_1_1_1_1_1_1	NT1	6144	1049	0.292969	Singlet	0.279661	10	10	NT	NK_cells	-0.0290743	-0.0450531	G1
AGTCATGTCTTACACT-1_1_1_1_1_1_1	NT1	866	434	1.15473	Singlet	0.00282486	2	2	NT	Myeloid_cells	-0.0124683	0.0292048	G2M
AGTCTCCGTACCTATG-1_1_1_1_1_1_1	NT1	5447	1995	5.03029	Singlet	0.240113	3	3	NT	T_cells	-0.00469491	-0.0242445	G1
AGTCTCCGTGACGCCT-1_1_1_1_1_1_1	NT1	1090	486	7.88991	Singlet	0	2	2	NT	Myeloid_cells	-0.0261247	0.0820378	G2M
AGTGACTAGTATCTGC-1_1_1_1_1_1_1	NT1	2090	975	0.813397	Singlet	0.0903955	7	7	NT	Myeloid_cells	-0.0370325	-0.0175859	G1
AGTGACTCAAGCGATG-1_1_1_1_1_1_1	NT1	23946	839	0.822684	Singlet	0.257062	10	10	NT	NK_cells	-0.00452765	-0.0322625	G1
AGTGACTCACAGCCAC-1_1_1_1_1_1_1	NT1	2094	941	3.72493	Singlet	0.00564972	3	3	NT	T_cells	0.0876682	-0.0288448	S
AGTGACTGTGTAGCAG-1_1_1_1_1_1_1	NT1	2000	1041	14	Singlet	0.225989	20	20	NT	Ductal_cells	-0.0641519	-0.0631795	G1
AGTGACTGTTGCGGCT-1_1_1_1_1_1_1	NT1	3266	1187	8.9406	Singlet	0.00847458	3	3	NT	T_cells	-0.0451221	-0.0789445	G1
AGTGATCAGCAGCACA-1_1_1_1_1_1_1	NT1	510	347	6.07843	Singlet	0.0423729	5	5	NT	Myeloid_cells	-0.014914	-0.0392219	G1
AGTGATCAGCCGATTT-1_1_1_1_1_1_1	NT1	2101	826	0.0475964	Singlet	0.169492	24	24	NT	Others	0.0199247	-0.0631407	S
AGTGATCTCATGCATG-1_1_1_1_1_1_1	NT1	2827	1272	3.07747	Singlet	0.0564972	8	8	NT	T_cells	-0.054091	0.00453249	G2M
AGTGATCTCTTGGGCG-1_1_1_1_1_1_1	NT1	676	340	13.4615	Singlet	0.00564972	2	2	NT	Myeloid_cells	-0.0170028	0.0533582	G2M
AGTGCCGAGCTCAGAG-1_1_1_1_1_1_1	NT1	4030	1404	6.50124	Singlet	0.0254237	3	3	NT	T_cells	-0.0142819	-0.0100997	G1
AGTGTTGAGTGCACTT-1_1_1_1_1_1_1	NT1	696	383	3.16092	Singlet	0.079096	4	4	NT	Myeloid_cells	-0.01611	-0.0505456	G1
AGTGTTGGTGAGACGT-1_1_1_1_1_1_1	NT1	1927	734	4.30721	Singlet	0.132768	4	4	NT	Myeloid_cells	-0.040318	-0.00778391	G1
AGTGTTGTCCTCAGAA-1_1_1_1_1_1_1	NT1	6200	1875	4.70968	Singlet	0.112994	3	3	NT	T_cells	-0.0346865	-0.0553405	G1
AGTTAGCCAAATGGAT-1_1_1_1_1_1_1	NT1	645	420	3.41085	Singlet	0.0367232	21	21	NT	Others	0.0355416	0.0454193	G2M
AGTTAGCCACGGCGTT-1_1_1_1_1_1_1	NT1	6111	1939	4.991	Singlet	0.358757	6	6	NT	Myeloid_cells	-0.0632254	-0.0316783	G1
AGTTAGCGTCGTGGAA-1_1_1_1_1_1_1	NT1	3198	1155	5.69106	Singlet	0.350282	6	6	NT	Myeloid_cells	0.0462056	-0.0459551	S
AGTTAGCTCGCGTGAC-1_1_1_1_1_1_1	NT1	4015	1698	3.21295	Singlet	0.282486	21	21	NT	Others	-0.0944783	-0.0356403	G1
AGTTAGCTCGGCATAT-1_1_1_1_1_1_1	NT1	23607	1651	6.20579	Singlet	0.271186	10	10	NT	NK_cells	-0.000435743	-0.0448303	G1
AGTTCGAAGCACCTGC-1_1_1_1_1_1_1	NT1	768	395	13.4115	Singlet	0.0254237	2	2	NT	Myeloid_cells	-0.0134203	-0.00875977	G1
ATACCGAGTGTTCCAA-1_1_1_1_1_1_1	NT1	3400	1248	7.26471	Singlet	0.0169492	3	3	NT	T_cells	0.0569829	-0.0181287	S
ATACCGATCACCGCTT-1_1_1_1_1_1_1	NT1	1755	813	15.9544	Singlet	0.0536723	3	3	NT	T_cells	0.00399007	-0.0366453	S
ATACCTTCATATCTCT-1_1_1_1_1_1_1	NT1	766	437	6.00522	Singlet	0.0677966	4	4	NT	Myeloid_cells	-0.0207015	-0.0149307	G1
ATACCTTGTATGCTAC-1_1_1_1_1_1_1	NT1	3297	1255	15.4686	Singlet	0.285311	4	4	NT	Myeloid_cells	-0.0545899	0.0444974	G2M
ATACCTTGTGTGCCTG-1_1_1_1_1_1_1	NT1	5912	1912	5.7341	Singlet	0.367232	6	6	NT	Myeloid_cells	-0.034934	0.00711238	G2M
ATACTTCTCACTCACC-1_1_1_1_1_1_1	NT1	4586	1696	5.47318	Singlet	0.163842	3	3	NT	T_cells	0.0312398	-0.0476523	S
ATACTTCTCCTACTGC-1_1_1_1_1_1_1	NT1	4114	1146	2.86825	Singlet	0.20339	24	24	NT	Others	-0.0135491	-0.0938749	G1
ATACTTCTCCTGTAAG-1_1_1_1_1_1_1	NT1	696	414	3.44828	Singlet	0.0480226	1	1	NT	Ductal_cells	0.0342307	-0.0606811	S
ATACTTCTCGCTACGG-1_1_1_1_1_1_1	NT1	4311	1695	5.45117	Singlet	0.237288	8	8	NT	T_cells	0.0569129	-0.0455027	S
ATACTTCTCGTGTGGC-1_1_1_1_1_1_1	NT1	5948	1918	3.36247	Singlet	0.177966	0	0	NT	T_cells	0.0460982	-0.0754258	S
ATAGACCAGTCCTACA-1_1_1_1_1_1_1	NT1	987	529	1.21581	Singlet	0.019774	7	7	NT	Myeloid_cells	-0.0271248	0.0263366	G2M
ATAGACCGTGACCGAA-1_1_1_1_1_1_1	NT1	3237	1227	4.44856	Singlet	0	0	0	NT	T_cells	-0.0199786	-0.038591	G1
ATAGAGAAGCGGGTAT-1_1_1_1_1_1_1	NT1	3715	1360	6.67564	Singlet	0.0225989	3	3	NT	T_cells	-0.0205046	-0.0332305	G1
ATAGAGAAGCTAGAAT-1_1_1_1_1_1_1	NT1	1342	704	1.26677	Singlet	0.0677966	7	7	NT	Myeloid_cells	-0.0338924	-0.0504765	G1
ATAGAGAGTGGATACG-1_1_1_1_1_1_1	NT1	2906	1210	5.9532	Singlet	0.0338983	3	3	NT	T_cells	0.0336313	-0.0828421	S
ATAGAGAGTTAAGTCC-1_1_1_1_1_1_1	NT1	5034	1620	6.23758	Singlet	0.0734463	3	3	NT	T_cells	-0.000865495	0.0257212	G2M
ATAGGCTAGAATTCAG-1_1_1_1_1_1_1	NT1	1476	733	1.62602	Singlet	0.0649718	7	7	NT	Myeloid_cells	-0.0311001	-0.0223957	G1
ATAGGCTCATTGAGGG-1_1_1_1_1_1_1	NT1	609	410	2.95567	Singlet	0.0423729	4	4	NT	Myeloid_cells	0.116471	-0.0121321	S
ATAGGCTGTCAATCTG-1_1_1_1_1_1_1	NT1	1657	564	5.85395	Singlet	0.00564972	2	2	NT	Myeloid_cells	-0.0219825	-0.0209643	G1
ATATCCTAGTATAGAC-1_1_1_1_1_1_1	NT1	924	347	16.6667	Singlet	0.0677966	18	18	NT	T_cells	-0.0338817	0.0614438	G2M
ATATCCTCACATATCG-1_1_1_1_1_1_1	NT1	1051	589	6.18459	Singlet	0.0847458	1	1	NT	Ductal_cells	-0.0405901	-0.0622606	G1
ATATCCTCAGCTGTCG-1_1_1_1_1_1_1	NT1	1341	587	2.60999	Singlet	0.019774	2	2	NT	Myeloid_cells	-0.0304985	0.0220507	G2M
ATATCCTGTGGTAACG-1_1_1_1_1_1_1	NT1	35491	1814	0.473359	Singlet	0.276836	10	10	NT	NK_cells	-0.0205072	-0.0531872	G1
ATATCCTGTGTATTCG-1_1_1_1_1_1_1	NT1	4349	1566	7.0361	Singlet	0.059322	0	0	NT	T_cells	0.0426251	0.0182875	S
ATCACAGAGTAAATGC-1_1_1_1_1_1_1	NT1	7525	2053	16.4917	Singlet	0.271186	4	4	NT	Myeloid_cells	-0.0418358	-0.038009	G1
ATCACAGTCGCTTTAT-1_1_1_1_1_1_1	NT1	1433	642	0.558269	Singlet	0.039548	7	7	NT	Myeloid_cells	-0.040205	0.0208911	G2M
ATCACAGTCTGCACCT-1_1_1_1_1_1_1	NT1	3807	1450	2.15393	Singlet	0.0480226	8	8	NT	T_cells	0.0962	0.0303151	S
ATCACGAAGAAGCCTG-1_1_1_1_1_1_1	NT1	1200	556	14.75	Singlet	0.0621469	1	1	NT	Ductal_cells	-0.0255581	0.0200423	G2M
ATCACGAAGGCTGGAT-1_1_1_1_1_1_1	NT1	4700	1489	6.55319	Singlet	0.0141243	3	3	NT	T_cells	0.00585217	0.0556548	G2M
ATCACGAAGTAAATGC-1_1_1_1_1_1_1	NT1	3124	1337	5.21767	Singlet	0.0847458	17	17	NT	NK_cells	-0.0140017	-0.0201382	G1
ATCACGACAACAAGAT-1_1_1_1_1_1_1	NT1	509	339	7.26916	Singlet	0.0451977	5	5	NT	Myeloid_cells	-0.0130578	-0.0543569	G1
ATCACGACACCCAAGC-1_1_1_1_1_1_1	NT1	1752	761	1.94064	Singlet	0.0621469	7	7	NT	Myeloid_cells	0.0171611	0.0264674	G2M
ATCACGAGTACGACAG-1_1_1_1_1_1_1	NT1	659	404	8.64947	Singlet	0.0508475	1	1	NT	Ductal_cells	-0.0316854	0.0321587	G2M
ATCACGAGTAGGAGGG-1_1_1_1_1_1_1	NT1	950	462	10.5263	Singlet	0.0847458	4	4	NT	Myeloid_cells	-0.011695	-0.0645522	G1
ATCACGAGTCCTCCAT-1_1_1_1_1_1_1	NT1	1579	756	14.6295	Singlet	0.0508475	8	8	NT	T_cells	-0.0437333	0.00546195	G2M
ATCACGATCCCTTGTG-1_1_1_1_1_1_1	NT1	643	378	11.9751	Singlet	0.00564972	2	2	NT	Myeloid_cells	-0.0280756	-0.0663591	G1
ATCACGATCGGTCACG-1_1_1_1_1_1_1	NT1	3233	1236	6.43365	Singlet	0.00564972	3	3	NT	T_cells	-0.0140876	0.0023477	G2M
ATCACGATCTCCAAGA-1_1_1_1_1_1_1	NT1	4514	1467	9.54807	Singlet	0.0169492	3	3	NT	T_cells	0.00203838	-0.0221066	S
ATCACTTCAGCTATAC-1_1_1_1_1_1_1	NT1	733	421	8.18554	Singlet	0.0960452	4	4	NT	Myeloid_cells	-0.0243134	-0.060225	G1
ATCACTTCATCCAACA-1_1_1_1_1_1_1	NT1	4895	2001	7.98774	Singlet	0.381356	14	14	NT	CAFs	-0.0939472	-0.121162	G1
ATCAGGTAGGAAGTGA-1_1_1_1_1_1_1	NT1	579	328	6.21762	Singlet	0.0254237	5	5	NT	Myeloid_cells	-0.0165208	-0.0533185	G1
ATCAGGTAGTATGATG-1_1_1_1_1_1_1	NT1	3601	1423	5.27631	Singlet	0.039548	3	3	NT	T_cells	0.0165607	0.0665741	G2M
ATCAGGTGTTGAGGAC-1_1_1_1_1_1_1	NT1	991	585	5.34813	Singlet	0.107345	4	4	NT	Myeloid_cells	0.0287599	0.0172165	S
ATCAGGTTCAGGACAG-1_1_1_1_1_1_1	NT1	2167	921	4.98385	Singlet	0.0225989	8	8	NT	T_cells	0.0362585	0.0594058	G2M
ATCATTCGTACCAGAG-1_1_1_1_1_1_1	NT1	733	362	5.59345	Singlet	0.0480226	4	4	NT	Myeloid_cells	-0.00826843	-0.0197671	G1
ATCCACCAGCTCCATA-1_1_1_1_1_1_1	NT1	1162	574	3.09811	Singlet	0.00564972	2	2	NT	Myeloid_cells	-0.0286672	0.0528705	G2M
ATCCACCCACCGTCGA-1_1_1_1_1_1_1	NT1	587	413	16.0136	Singlet	0.0367232	21	21	NT	Others	-0.0302958	-0.0724989	G1
ATCCACCTCACGGAGA-1_1_1_1_1_1_1	NT1	6354	669	0.0157381	Singlet	0.262712	10	10	NT	NK_cells	-0.0271076	-0.0423246	G1
ATCCATTCATAGGTTC-1_1_1_1_1_1_1	NT1	5902	1908	5.59132	Singlet	0.358757	6	6	NT	Myeloid_cells	0.045758	-0.0486396	S
ATCCATTCATGACACT-1_1_1_1_1_1_1	NT1	5010	1540	5.3493	Singlet	0.019774	0	0	NT	T_cells	0.0734331	-0.0454801	S
ATCCATTTCTGTCGTC-1_1_1_1_1_1_1	NT1	1211	648	11.313	Singlet	0.175141	14	14	NT	CAFs	0.00970681	-0.085576	S
ATCCATTTCTTAGCCC-1_1_1_1_1_1_1	NT1	822	489	1.58151	Singlet	0.00564972	2	2	NT	Myeloid_cells	-0.0336179	0.122137	G2M
ATCCGTCAGCTAGATA-1_1_1_1_1_1_1	NT1	7793	2401	10.3811	Singlet	0.384181	14	14	NT	CAFs	-0.0366225	-0.106695	G1
ATCCGTCGTAGTCGTT-1_1_1_1_1_1_1	NT1	1394	692	3.08465	Singlet	0.0423729	7	7	NT	Myeloid_cells	-0.0344323	-0.0113958	G1
ATCCTATAGGTCTTTG-1_1_1_1_1_1_1	NT1	1747	1016	8.29994	Singlet	0.206215	20	20	NT	Ductal_cells	0.0485355	0.0691721	G2M
ATCCTATCAATTTCGG-1_1_1_1_1_1_1	NT1	631	330	3.80349	Singlet	0.0480226	14	14	NT	CAFs	-0.0195499	-0.0514632	G1
ATCCTATTCGTTCTAT-1_1_1_1_1_1_1	NT1	1262	680	1.26783	Singlet	0.0677966	7	7	NT	Myeloid_cells	-0.0330584	-0.082966	G1
ATCGATGCATGTGGCC-1_1_1_1_1_1_1	NT1	3876	1520	5.77915	Singlet	0.0734463	3	3	NT	T_cells	0.00856283	-0.0291115	S
ATCGATGCATTGAAGA-1_1_1_1_1_1_1	NT1	31027	2252	0.148258	Singlet	0.279661	10	10	NT	NK_cells	-0.0188457	-0.0626209	G1
ATCGCCTAGCACCTGC-1_1_1_1_1_1_1	NT1	653	399	0.765697	Singlet	0	2	2	NT	Myeloid_cells	-0.0283403	0.00282433	G2M
ATCGCCTGTCCGGACT-1_1_1_1_1_1_1	NT1	3538	1230	4.0701	Singlet	0.0169492	12	12	NT	T_cells	0.0605666	-0.00558875	S
ATCGGATAGTAGAATC-1_1_1_1_1_1_1	NT1	3598	1280	8.6159	Singlet	0.0169492	3	3	NT	T_cells	0.0398404	-0.0713387	S
ATCGGATTCTAAGCCA-1_1_1_1_1_1_1	NT1	4561	1744	6.09515	Singlet	0.19774	3	3	NT	T_cells	0.0200424	0.00384692	S
ATCGGCGCATCAGCGC-1_1_1_1_1_1_1	NT1	2560	616	29.7266	Singlet	0.079096	15	15	NT	B_cells	0.00499997	0.0349121	G2M
ATCGGCGTCAGACCCG-1_1_1_1_1_1_1	NT1	793	419	12.7364	Singlet	0.0367232	18	18	NT	T_cells	-0.0257383	-0.0589596	G1
ATCGTAGCAACGAGGT-1_1_1_1_1_1_1	NT1	3687	506	0.0542446	Singlet	0.274011	10	10	NT	NK_cells	0.0142539	-0.0182797	S
ATCGTCCCAAATACAG-1_1_1_1_1_1_1	NT1	3354	1252	7.96064	Singlet	0.0112994	3	3	NT	T_cells	0.0550811	-0.0464722	S
ATCGTCCCATGATCTG-1_1_1_1_1_1_1	NT1	6353	1463	3.73052	Singlet	0.0367232	0	0	NT	T_cells	0.0379889	-0.0337063	S
ATCGTCCGTCCACAGC-1_1_1_1_1_1_1	NT1	522	352	3.83142	Singlet	0.0112994	2	2	NT	Myeloid_cells	-0.022619	-0.00598483	G1
ATCGTGATCTGCACCT-1_1_1_1_1_1_1	NT1	4697	1803	3.76836	Singlet	0.279661	9	9	NT	NK_cells	0.0231091	-0.0462315	S
ATCTCTAAGTCGAAAT-1_1_1_1_1_1_1	NT1	4014	1380	16.4425	Singlet	0.0141243	3	3	NT	T_cells	0.0848504	0.0062061	S
ATCTCTACACCGGAAA-1_1_1_1_1_1_1	NT1	1171	561	8.8813	Singlet	0.0225989	0	0	NT	T_cells	0.0355413	-0.0630022	S
ATCTCTAGTCATGACT-1_1_1_1_1_1_1	NT1	5844	2143	4.51745	Singlet	0.372881	6	6	NT	Myeloid_cells	0.0590545	-0.0367857	S
ATCTCTAGTGGCCCAT-1_1_1_1_1_1_1	NT1	1243	759	8.20595	Singlet	0.152542	20	20	NT	Ductal_cells	0.0129921	0.000425941	S
ATCTCTATCGCGTCGA-1_1_1_1_1_1_1	NT1	17665	809	0.984999	Singlet	0.259887	10	10	NT	NK_cells	-0.00365102	-0.0342214	G1
ATCTTCAAGCCTGTCG-1_1_1_1_1_1_1	NT1	1463	699	2.73411	Singlet	0.059322	7	7	NT	Myeloid_cells	-0.0294509	-0.0887324	G1
ATCTTCAAGGGACACT-1_1_1_1_1_1_1	NT1	4653	1509	6.23254	Singlet	0.0706215	9	9	NT	NK_cells	0.00442179	0.0458047	G2M
ATCTTCAAGGTAGTAT-1_1_1_1_1_1_1	NT1	682	387	3.37243	Singlet	0.039548	1	1	NT	Ductal_cells	0.0518303	-0.00748036	S
ATGAAAGAGGCATGGT-1_1_1_1_1_1_1	NT1	3876	1318	6.44995	Singlet	0.0112994	3	3	NT	T_cells	-0.010295	-0.0186047	G1
ATGAAAGAGGGCAGTT-1_1_1_1_1_1_1	NT1	5706	1708	7.48335	Singlet	0.358757	6	6	NT	Myeloid_cells	-0.0467225	-0.00571423	G1
ATGAAAGCAGAGTGTG-1_1_1_1_1_1_1	NT1	2965	979	1.55143	Singlet	0.0875706	2	2	NT	Myeloid_cells	-0.0405098	-0.0258615	G1
ATGAAAGTCACTGATG-1_1_1_1_1_1_1	NT1	630	392	5.87302	Singlet	0.059322	5	5	NT	Myeloid_cells	0.0497504	-0.0624025	S
ATGACCACAAAGCACG-1_1_1_1_1_1_1	NT1	676	423	6.36095	Singlet	0	7	7	NT	Myeloid_cells	-0.0210537	0.0902347	G2M
ATGACCACAAGAGTGC-1_1_1_1_1_1_1	NT1	1059	545	1.322	Singlet	0.019774	2	2	NT	Myeloid_cells	-0.0235236	-0.0317108	G1
ATGACCACAAGATCCT-1_1_1_1_1_1_1	NT1	3709	1534	5.01483	Singlet	0.254237	9	9	NT	NK_cells	0.0192941	-0.00715855	S
ATGACCACATGCACTA-1_1_1_1_1_1_1	NT1	3593	1179	1.44726	Singlet	0.350282	5	5	NT	Myeloid_cells	-0.0137486	-0.0079902	G1
ATGAGGGAGGTGAGAA-1_1_1_1_1_1_1	NT1	7578	2337	10.1346	Singlet	0.378531	14	14	NT	CAFs	-0.0671847	-0.0173789	G1
ATGAGGGCAGCGTAGA-1_1_1_1_1_1_1	NT1	3039	1180	3.78414	Singlet	0.00564972	3	3	NT	T_cells	0.0401389	-0.0452541	S
ATGAGTCAGAGGGTAA-1_1_1_1_1_1_1	NT1	3463	1346	7.65232	Singlet	0.0225989	3	3	NT	T_cells	0.0389205	0.00672703	S
ATGAGTCAGGAGTCTG-1_1_1_1_1_1_1	NT1	923	479	6.06717	Singlet	0	2	2	NT	Myeloid_cells	-0.0232378	0.0156052	G2M
ATGAGTCTCCGCAACG-1_1_1_1_1_1_1	NT1	1237	613	5.17381	Singlet	0.0225989	7	7	NT	Myeloid_cells	-0.0347727	-0.0395585	G1
ATGATCGTCTACTTCA-1_1_1_1_1_1_1	NT1	3970	1660	4.25693	Singlet	0.299435	9	9	NT	NK_cells	-0.00651792	0.0065732	G2M
ATGCATGCAAACCACT-1_1_1_1_1_1_1	NT1	1663	917	2.16476	Singlet	0.158192	21	21	NT	Others	-0.052165	-0.0966559	G1
ATGCATGGTCTTGCGG-1_1_1_1_1_1_1	NT1	9536	525	3.60738	Singlet	0.257062	10	10	NT	NK_cells	0.00360114	-0.0220084	S
ATGCATGGTTGATGTC-1_1_1_1_1_1_1	NT1	1034	607	10.058	Singlet	0.214689	11	11	NT	Ductal_cells	0.014742	-0.0854814	S
ATGCCTCTCACCATGA-1_1_1_1_1_1_1	NT1	3210	1258	7.19626	Singlet	0.0169492	3	3	NT	T_cells	0.0182368	-0.0159831	S
ATGCCTCTCGGTAACT-1_1_1_1_1_1_1	NT1	3835	1409	3.52021	Singlet	0.0225989	8	8	NT	T_cells	0.022909	0.0167656	S
ATGCCTCTCTACGGGC-1_1_1_1_1_1_1	NT1	1104	464	7.69928	Singlet	0.079096	4	4	NT	Myeloid_cells	-0.0221496	-0.0100345	G1
ATGCGATCATGACACT-1_1_1_1_1_1_1	NT1	677	320	15.2142	Singlet	0.079096	4	4	NT	Myeloid_cells	-0.0140027	-0.0516728	G1
ATGGAGGAGACGTCCC-1_1_1_1_1_1_1	NT1	772	443	5.44041	Singlet	0.00564972	2	2	NT	Myeloid_cells	0.0384534	0.0183081	S
ATGGATCGTCACTACA-1_1_1_1_1_1_1	NT1	853	453	1.87573	Singlet	0.0112994	2	2	NT	Myeloid_cells	-0.0254763	-0.0174853	G1
ATGGGAGAGGTTCATC-1_1_1_1_1_1_1	NT1	3232	1186	9.31312	Singlet	0.00282486	3	3	NT	T_cells	-0.0465481	-0.0793424	G1
ATGGGAGCAATCGCAT-1_1_1_1_1_1_1	NT1	3787	1312	9.11011	Singlet	0.0367232	17	17	NT	NK_cells	0.00627279	-0.0568037	S
ATGGGAGTCCCGAAAT-1_1_1_1_1_1_1	NT1	3608	1306	11.1973	Singlet	0.00847458	3	3	NT	T_cells	0.00123423	-0.0212118	S
ATGGGAGTCGCAGATT-1_1_1_1_1_1_1	NT1	3979	1532	19.804	Singlet	0.299435	4	4	NT	Myeloid_cells	-0.0736152	0.0446576	G2M
ATGGGTTAGGACTAAT-1_1_1_1_1_1_1	NT1	4059	1437	3.74476	Singlet	0.107345	9	9	NT	NK_cells	0.0404859	0.0261514	S
ATGGGTTCACACCTGG-1_1_1_1_1_1_1	NT1	5367	1434	2.34768	Singlet	0.0367232	3	3	NT	T_cells	0.027105	-0.0026401	S
ATGGGTTTCAGCGCGT-1_1_1_1_1_1_1	NT1	10581	730	0.245723	Singlet	0.262712	10	10	NT	NK_cells	-0.0147606	-0.0416354	G1
ATGGTTGAGACATGCG-1_1_1_1_1_1_1	NT1	2783	996	6.46784	Singlet	0.00847458	3	3	NT	T_cells	-0.0377034	0.0166652	G2M
ATGGTTGAGGATACGC-1_1_1_1_1_1_1	NT1	1731	914	15.7135	Singlet	0.20904	22	22	NT	Ductal_cells	0.0261203	-0.0961676	S
ATGGTTGGTTCAGTAC-1_1_1_1_1_1_1	NT1	5442	1808	5.78831	Singlet	0.367232	6	6	NT	Myeloid_cells	-0.0425897	-0.107506	G1
ATGGTTGTCGGCCCAA-1_1_1_1_1_1_1	NT1	5207	1890	4.43634	Singlet	0.240113	17	17	NT	NK_cells	0.0206448	-0.0545845	S
ATGTCCCCATTGTCGA-1_1_1_1_1_1_1	NT1	5201	1512	7.05634	Singlet	0.355932	6	6	NT	Myeloid_cells	0.0590765	0.0137733	S
ATGTCCCTCCATAAGC-1_1_1_1_1_1_1	NT1	2776	980	1.44092	Singlet	0.079096	7	7	NT	Myeloid_cells	-0.0394042	0.139121	G2M
ATGTCCCTCTATTTCG-1_1_1_1_1_1_1	NT1	4165	1397	8.54742	Singlet	0.00847458	3	3	NT	T_cells	0.0155921	0.0209565	G2M
ATGTCTTAGACTTAAG-1_1_1_1_1_1_1	NT1	4592	1592	4.20296	Singlet	0.0819209	3	3	NT	T_cells	0.0331709	-0.0159924	S
ATGTCTTGTGTGTGGA-1_1_1_1_1_1_1	NT1	5971	1819	7.40245	Singlet	0.110169	3	3	NT	T_cells	-0.00229154	0.117249	G2M
ATGTCTTTCTGGCCGA-1_1_1_1_1_1_1	NT1	2137	754	12.6345	Singlet	0.0282486	7	7	NT	Myeloid_cells	0.0526571	0.0347339	S
ATTACCTCACCGTCGA-1_1_1_1_1_1_1	NT1	1312	437	16.997	Singlet	0.0508475	6	6	NT	Myeloid_cells	-0.0225652	-0.0660925	G1
ATTACCTGTACGACAG-1_1_1_1_1_1_1	NT1	6024	1993	9.52855	Singlet	0.353107	14	14	NT	CAFs	0.073598	-0.0321615	S
ATTACCTTCAGGAAGC-1_1_1_1_1_1_1	NT1	6353	1992	11.6008	Singlet	0.361582	4	4	NT	Myeloid_cells	-0.0449541	-0.0276134	G1
ATTACTCAGAAGCGGG-1_1_1_1_1_1_1	NT1	3260	1278	11.5337	Singlet	0.299435	4	4	NT	Myeloid_cells	0.00525163	-0.125892	S
ATTACTCAGTGCGCTC-1_1_1_1_1_1_1	NT1	1224	601	17.0752	Singlet	0.177966	11	11	NT	Ductal_cells	-0.0314026	0.00338939	G2M
ATTACTCCAGACTGCC-1_1_1_1_1_1_1	NT1	1922	876	2.39334	Singlet	0.079096	7	7	NT	Myeloid_cells	-0.0422137	-0.0168398	G1
ATTACTCTCTTTGATC-1_1_1_1_1_1_1	NT1	3552	1299	4.13851	Singlet	0.0254237	3	3	NT	T_cells	-0.0427576	-0.0141566	G1
ATTATCCCACGGCCAT-1_1_1_1_1_1_1	NT1	735	497	0.816327	Singlet	0.0734463	21	21	NT	Others	0.060363	-0.0212758	S
ATTATCCCATATAGCC-1_1_1_1_1_1_1	NT1	3910	1339	9.56522	Singlet	0.0141243	3	3	NT	T_cells	0.0509128	0.00556498	S
ATTATCCGTTCTATCT-1_1_1_1_1_1_1	NT1	961	565	4.57856	Singlet	0.0903955	21	21	NT	Others	-0.035939	-0.0380099	G1
ATTCACTCAGAGCGTA-1_1_1_1_1_1_1	NT1	4398	1589	7.04866	Singlet	0.0988701	3	3	NT	T_cells	0.0180348	-0.0414228	S
ATTCACTGTAATACCC-1_1_1_1_1_1_1	NT1	1073	532	3.54147	Singlet	0.0903955	4	4	NT	Myeloid_cells	-0.0293979	-0.0621616	G1
ATTCACTTCCGGCAAC-1_1_1_1_1_1_1	NT1	2054	1206	0.0486855	Singlet	0.344633	22	22	NT	Ductal_cells	0.0152862	0.0593661	G2M
ATTCAGGAGTTGCGCC-1_1_1_1_1_1_1	NT1	654	365	9.63303	Singlet	0.0762712	4	4	NT	Myeloid_cells	-0.0164352	-0.0655616	G1
ATTCAGGCAGGTTTAC-1_1_1_1_1_1_1	NT1	4797	1601	7.04607	Singlet	0.0621469	3	3	NT	T_cells	0.0627625	-0.0086949	S
ATTCAGGTCCGCTGTT-1_1_1_1_1_1_1	NT1	4606	1688	4.86322	Singlet	0.146893	3	3	NT	T_cells	0.0303022	-0.0647357	S
ATTCAGGTCTAGATCG-1_1_1_1_1_1_1	NT1	3799	1298	4.71177	Singlet	0.019774	8	8	NT	T_cells	0.00696944	-0.0396646	S
ATTCATCAGGATTTCC-1_1_1_1_1_1_1	NT1	3052	1227	6.58585	Singlet	0.0254237	17	17	NT	NK_cells	0.101259	-0.0572199	S
ATTCATCCAGCAGGAT-1_1_1_1_1_1_1	NT1	733	431	2.18281	Singlet	0	2	2	NT	Myeloid_cells	-0.0272703	-0.0598914	G1
ATTCATCCAGCTGGTC-1_1_1_1_1_1_1	NT1	5158	1988	5.77743	Singlet	0.29096	9	9	NT	NK_cells	0.0182906	-0.0229425	S
ATTCATCGTTCTAACG-1_1_1_1_1_1_1	NT1	837	454	4.77897	Singlet	0	2	2	NT	Myeloid_cells	-0.0260517	-0.000878201	G1
ATTCATCTCGAAGCCC-1_1_1_1_1_1_1	NT1	4726	1758	5.84003	Singlet	0.200565	3	3	NT	T_cells	0.0258406	-0.0608183	S
ATTCCATAGTGCGTCC-1_1_1_1_1_1_1	NT1	1606	612	6.16438	Singlet	0.107345	4	4	NT	Myeloid_cells	0.0762052	-0.0283008	S
ATTCCATCAATGTTGC-1_1_1_1_1_1_1	NT1	2595	1444	12.1773	Singlet	0.322034	20	20	NT	Ductal_cells	0.425946	0.450688	G2M
ATTCCATGTAACCAGG-1_1_1_1_1_1_1	NT1	1908	986	5.60797	Singlet	0.183616	21	21	NT	Others	-0.0577925	-0.0783022	G1
ATTCCATTCCAGTACA-1_1_1_1_1_1_1	NT1	6099	2004	6.96836	Singlet	0.375706	4	4	NT	Myeloid_cells	0.00627714	-0.0120318	S
ATTCCCGAGCTTGTGT-1_1_1_1_1_1_1	NT1	2225	943	5.16854	Singlet	0.019774	0	0	NT	T_cells	-0.0413081	-0.0183138	G1
ATTCCCGCAAGCCTGC-1_1_1_1_1_1_1	NT1	3370	1605	4.273	Singlet	0.350282	14	14	NT	CAFs	-0.0446313	-0.00632256	G1
ATTCCCGTCGTCTAAG-1_1_1_1_1_1_1	NT1	2414	1047	5.50953	Singlet	0.0169492	8	8	NT	T_cells	-0.00976639	-0.0503086	G1
ATTCCTAAGCCGGAAT-1_1_1_1_1_1_1	NT1	669	426	2.24215	Singlet	0.0649718	4	4	NT	Myeloid_cells	-0.0136503	-0.0629063	G1
ATTCCTACAGGACTTT-1_1_1_1_1_1_1	NT1	1101	558	4.26885	Singlet	0.0141243	7	7	NT	Myeloid_cells	-0.0235722	-0.0283062	G1
ATTCGTTGTCTGATCA-1_1_1_1_1_1_1	NT1	864	530	0	Singlet	0.0706215	4	4	NT	Myeloid_cells	0.0267365	-0.065604	S
ATTCGTTGTGGCATCC-1_1_1_1_1_1_1	NT1	3851	1168	5.89457	Singlet	0.175141	19	19	NT	Myeloid_cells	-0.0449325	-0.0528898	G1
ATTCGTTTCTCTAAGG-1_1_1_1_1_1_1	NT1	5318	1361	7.01392	Singlet	0.0367232	0	0	NT	T_cells	-0.0143145	-0.032682	G1
ATTCTACAGTTTCGAC-1_1_1_1_1_1_1	NT1	27281	988	0.318903	Singlet	0.262712	10	10	NT	NK_cells	-0.015504	-0.0276068	G1
ATTCTTGAGGATTTCC-1_1_1_1_1_1_1	NT1	887	488	3.26945	Singlet	0.0141243	2	2	NT	Myeloid_cells	-0.0208875	-0.0675619	G1
ATTGGGTCATCAGTGT-1_1_1_1_1_1_1	NT1	776	426	7.08763	Singlet	0.079096	4	4	NT	Myeloid_cells	-0.02134	-0.0739877	G1
ATTGTTCAGGTAACTA-1_1_1_1_1_1_1	NT1	1197	524	4.01003	Singlet	0.0819209	4	4	NT	Myeloid_cells	0.0269042	-0.0699001	S
ATTGTTCCACCGCTAG-1_1_1_1_1_1_1	NT1	2838	1190	6.94151	Singlet	0.259887	4	4	NT	Myeloid_cells	0.0346656	-0.0475425	S
ATTGTTCCAGGTAGTG-1_1_1_1_1_1_1	NT1	6922	1919	7.94568	Singlet	0.372881	6	6	NT	Myeloid_cells	-0.00845952	-0.0622929	G1
ATTGTTCCATCGTGGC-1_1_1_1_1_1_1	NT1	3894	1419	5.52131	Singlet	0.0141243	3	3	NT	T_cells	-0.011524	-0.0615502	G1
ATTGTTCTCCTCATAT-1_1_1_1_1_1_1	NT1	1149	542	1.56658	Singlet	0.00282486	2	2	NT	Myeloid_cells	-0.0281809	0.0950142	G2M
ATTTACCAGAAATTGC-1_1_1_1_1_1_1	NT1	2086	707	9.9233	Singlet	0.127119	6	6	NT	Myeloid_cells	0.0101752	-0.0368944	S
ATTTACCCACATGAAA-1_1_1_1_1_1_1	NT1	3580	1342	4.9162	Singlet	0.0225989	3	3	NT	T_cells	0.0987367	0.0835281	S
ATTTACCCAGACGATG-1_1_1_1_1_1_1	NT1	1265	701	1.18577	Singlet	0.183616	22	22	NT	Ductal_cells	-0.0403961	-0.0997263	G1
ATTTCACAGCTGTTCA-1_1_1_1_1_1_1	NT1	7631	461	0.0524178	Singlet	0.257062	10	10	NT	NK_cells	-0.0106249	-0.0349431	G1
ATTTCACAGGATATAC-1_1_1_1_1_1_1	NT1	1656	501	2.89855	Singlet	0.138418	24	24	NT	Others	0.0277298	-0.0619258	S
ATTTCACCAAGATGTA-1_1_1_1_1_1_1	NT1	1593	870	10.4206	Singlet	0.19774	20	20	NT	Ductal_cells	-0.0500661	-0.0604132	G1
ATTTCACCACGACCTG-1_1_1_1_1_1_1	NT1	4425	1618	4.15819	Singlet	0.132768	3	3	NT	T_cells	-0.00712239	-0.0189598	G1
ATTTCACTCGGTAGGA-1_1_1_1_1_1_1	NT1	3272	1180	6.23472	Singlet	0.00564972	3	3	NT	T_cells	-0.0131869	-0.00241161	G1
ATTTCTGAGGGAGGGT-1_1_1_1_1_1_1	NT1	3769	1436	5.01459	Singlet	0.059322	3	3	NT	T_cells	0.0116606	-0.0427351	S
ATTTCTGCAAGACGGT-1_1_1_1_1_1_1	NT1	730	406	14.6575	Singlet	0.0338983	1	1	NT	Ductal_cells	-0.00993625	-0.0579299	G1
ATTTCTGTCTGTACAG-1_1_1_1_1_1_1	NT1	557	360	2.33393	Singlet	0.0451977	14	14	NT	CAFs	0.0550121	-0.00411924	S
CAAAGAAAGGCGACAT-1_1_1_1_1_1_1	NT1	793	439	2.26986	Singlet	0	2	2	NT	Myeloid_cells	0.040333	-0.0105374	S
CAAAGAAAGTAGTGCG-1_1_1_1_1_1_1	NT1	5202	1625	5.97847	Singlet	0.0282486	3	3	NT	T_cells	0.0235871	-0.0392539	S
CAAAGAACAGCAGTAG-1_1_1_1_1_1_1	NT1	5172	1772	3.49961	Singlet	0.20904	8	8	NT	T_cells	0.0115042	-0.0129363	S
CAAAGAATCCAAGCCG-1_1_1_1_1_1_1	NT1	1177	588	26.0833	Singlet	0.0932203	0	0	NT	T_cells	-0.0473417	-0.0267295	G1
CAAAGAATCCCTCTAG-1_1_1_1_1_1_1	NT1	7955	943	0.17599	Singlet	0.146893	24	24	NT	Others	-0.0258868	-0.0300544	G1
CAAAGAATCCCTTCCC-1_1_1_1_1_1_1	NT1	826	418	7.14286	Singlet	0.0423729	4	4	NT	Myeloid_cells	-0.0196696	-0.00293973	G1
CAAAGAATCCGCTTAC-1_1_1_1_1_1_1	NT1	5561	1834	7.94821	Singlet	0.172316	3	3	NT	T_cells	0.0154258	0.0639629	G2M
CAACAACAGAGTGACC-1_1_1_1_1_1_1	NT1	5569	1795	2.891	Singlet	0.129944	3	3	NT	T_cells	0.0303618	-0.0592329	S
CAACAACGTCCTCAGG-1_1_1_1_1_1_1	NT1	986	497	9.33063	Singlet	0.0819209	4	4	NT	Myeloid_cells	0.0308968	-0.0608801	S
CAACAGTTCGGCGATC-1_1_1_1_1_1_1	NT1	32022	906	0.512148	Singlet	0.257062	10	10	NT	NK_cells	-0.0138527	-0.0324003	G1
CAACCAACACAATTCG-1_1_1_1_1_1_1	NT1	1245	567	9.95984	Singlet	0.0169492	2	2	NT	Myeloid_cells	-0.034684	0.0217681	G2M
CAACCAACAGGCATGA-1_1_1_1_1_1_1	NT1	4169	1520	2.03886	Singlet	0.079096	8	8	NT	T_cells	0.00803371	0.0305591	G2M
CAACCAAGTACCCGAC-1_1_1_1_1_1_1	NT1	3907	1488	4.76069	Singlet	0.0734463	3	3	NT	T_cells	-0.0139648	0.0255417	G2M
CAACCAAGTCCGAAGA-1_1_1_1_1_1_1	NT1	587	398	7.83646	Singlet	0.0508475	15	15	NT	B_cells	-0.022039	0.268823	G2M
CAACCAATCCGTATGA-1_1_1_1_1_1_1	NT1	1018	481	6.4833	Singlet	0.00282486	2	2	NT	Myeloid_cells	-0.0226497	-0.0214692	G1
CAACCAATCGCAACAT-1_1_1_1_1_1_1	NT1	789	459	14.7022	Singlet	0.0762712	1	1	NT	Ductal_cells	-0.042304	-0.0566128	G1
CAACGATAGCTGGTGA-1_1_1_1_1_1_1	NT1	3946	1624	3.59858	Singlet	0.271186	9	9	NT	NK_cells	-0.0265466	-0.0342875	G1
CAACGATAGTGGTTCT-1_1_1_1_1_1_1	NT1	1802	624	22.6415	Singlet	0.039548	4	4	NT	Myeloid_cells	-0.0420642	-0.065323	G1
CAACGATCAACGATTC-1_1_1_1_1_1_1	NT1	3740	1415	4.4385	Singlet	0.0310734	3	3	NT	T_cells	0.0638793	-0.0418915	S
CAACGATCATGCACTA-1_1_1_1_1_1_1	NT1	971	536	2.16272	Singlet	0.0141243	7	7	NT	Myeloid_cells	-0.0340645	-0.0709075	G1
CAACGATTCATGAAAG-1_1_1_1_1_1_1	NT1	4382	1453	6.86901	Singlet	0.019774	3	3	NT	T_cells	0.0142683	0.0480504	G2M
CAACGATTCGGTGTTA-1_1_1_1_1_1_1	NT1	1253	491	0.319234	Singlet	0.0621469	4	4	NT	Myeloid_cells	-0.0238791	-0.0639765	G1
CAACGGCAGATACGAT-1_1_1_1_1_1_1	NT1	1075	535	0.837209	Singlet	0.0254237	2	2	NT	Myeloid_cells	0.0306084	-0.0783069	S
CAACGGCAGTGCCCGT-1_1_1_1_1_1_1	NT1	5243	1937	1.77379	Singlet	0.358757	21	21	NT	Others	-0.0387419	-0.0920532	G1
CAACGGCGTAGCCAGA-1_1_1_1_1_1_1	NT1	2221	1008	2.11616	Singlet	0.155367	4	4	NT	Myeloid_cells	-0.0523826	-0.0321769	G1
CAACGGCTCTTGTTAC-1_1_1_1_1_1_1	NT1	3936	1449	4.75102	Singlet	0.0225989	3	3	NT	T_cells	0.000286027	-0.000601478	S
CAAGACTAGGGCGAAG-1_1_1_1_1_1_1	NT1	694	423	5.04323	Singlet	0.0762712	4	4	NT	Myeloid_cells	-0.0151662	-0.0707094	G1
CAAGACTCATCGTGGC-1_1_1_1_1_1_1	NT1	601	382	17.3045	Singlet	0.0819209	1	1	NT	Ductal_cells	-0.0381989	-0.0651802	G1
CAAGACTGTCCATAGT-1_1_1_1_1_1_1	NT1	3048	1188	6.2336	Singlet	0.00847458	8	8	NT	T_cells	0.0350498	-0.0505099	S
CAAGACTGTCCGTACG-1_1_1_1_1_1_1	NT1	3498	1259	6.7753	Singlet	0.0141243	3	3	NT	T_cells	0.0294475	0.020682	S
CAAGACTGTTCAAACC-1_1_1_1_1_1_1	NT1	977	508	2.96827	Singlet	0.00564972	2	2	NT	Myeloid_cells	-0.0134144	-0.0343082	G1
CAAGACTTCCCGATCT-1_1_1_1_1_1_1	NT1	826	465	10.8959	Singlet	0.0367232	15	15	NT	B_cells	0.0954121	0.0699807	S
CAAGAGGCAACCGGAA-1_1_1_1_1_1_1	NT1	4342	1556	13.1276	Singlet	0.141243	17	17	NT	NK_cells	-0.0312339	0.0158464	G2M
CAAGAGGCACTTGTGA-1_1_1_1_1_1_1	NT1	889	490	3.14961	Singlet	0.00564972	2	2	NT	Myeloid_cells	-0.0177834	0.0694747	G2M
CAAGAGGCAGAGCTAG-1_1_1_1_1_1_1	NT1	1627	983	1.41364	Singlet	0.237288	1	1	NT	Ductal_cells	0.0354629	0.000667571	S
CAAGAGGCATTGTAGC-1_1_1_1_1_1_1	NT1	16084	563	0.0124347	Singlet	0.257062	10	10	NT	NK_cells	0.00335754	-0.0196088	S
CAAGCTAAGGTCGTGA-1_1_1_1_1_1_1	NT1	3071	1259	13.2856	Singlet	0.293785	4	4	NT	Myeloid_cells	-0.0328744	0.0722637	G2M
CAAGCTATCCTAAACG-1_1_1_1_1_1_1	NT1	986	433	8.41785	Singlet	0.0508475	4	4	NT	Myeloid_cells	-0.0230778	-0.0175159	G1
CAAGGGAGTAAGATAC-1_1_1_1_1_1_1	NT1	1161	475	0.0861326	Singlet	0.248588	10	10	NT	NK_cells	-0.0275421	-0.0290495	G1
CAAGGGAGTGCATGTT-1_1_1_1_1_1_1	NT1	2881	1068	7.63624	Singlet	0.0112994	3	3	NT	T_cells	-0.0479403	0.0150805	G2M
CAAGGGAGTGGTACAG-1_1_1_1_1_1_1	NT1	806	416	2.48139	Singlet	0	16	16	NT	Myeloid_cells	-0.0220028	-0.0127292	G1
CAAGGGAGTGGTCTTA-1_1_1_1_1_1_1	NT1	2796	1094	5.40057	Singlet	0.0169492	8	8	NT	T_cells	-0.0113215	0.0993771	G2M
CAAGGGATCGCCGAGT-1_1_1_1_1_1_1	NT1	2254	930	7.00976	Singlet	0.152542	4	4	NT	Myeloid_cells	0.00748941	-0.0649493	S
CAATACGAGCAACCAG-1_1_1_1_1_1_1	NT1	8727	1946	4.14805	Singlet	0.0367232	0	0	NT	T_cells	-0.00439526	-0.0318003	G1
CAATACGAGCGACTTT-1_1_1_1_1_1_1	NT1	37314	1201	0.0107198	Singlet	0.265537	10	10	NT	NK_cells	-0.0151092	-0.0341626	G1
CAATACGGTGACGCCT-1_1_1_1_1_1_1	NT1	5173	1498	7.90644	Singlet	0.019774	3	3	NT	T_cells	-0.0403653	-0.0227988	G1
CAATACGGTGACGTCC-1_1_1_1_1_1_1	NT1	3882	1474	7.93405	Singlet	0.0875706	3	3	NT	T_cells	0.129638	0.0350749	S
CAATACGTCTTCTAAC-1_1_1_1_1_1_1	NT1	4082	317	0.979912	Singlet	0.248588	10	10	NT	NK_cells	-0.0144038	-0.0325428	G1
CAATACGTCTTGGTCC-1_1_1_1_1_1_1	NT1	5310	1456	7.23164	Singlet	0.19774	13	13	NT	B_cells	-0.0557682	-0.00623989	G1
CAATCGAAGCCGCACT-1_1_1_1_1_1_1	NT1	4226	1455	9.13393	Singlet	0.019774	3	3	NT	T_cells	-0.0478251	0.01088	G2M
CAATCGAGTGGCCTCA-1_1_1_1_1_1_1	NT1	4857	1660	9.45028	Singlet	0.110169	3	3	NT	T_cells	0.0346907	-0.0104778	S
CAATCGATCAAGGACG-1_1_1_1_1_1_1	NT1	3303	1134	4.05692	Singlet	0.0677966	0	0	NT	T_cells	0.0225677	-0.024804	S
CAATTTCTCAGATGCT-1_1_1_1_1_1_1	NT1	6209	2230	3.86536	Singlet	0.299435	9	9	NT	NK_cells	0.094726	-0.0841341	S
CAATTTCTCCCGATCT-1_1_1_1_1_1_1	NT1	4175	1441	6.97006	Singlet	0.0451977	3	3	NT	T_cells	0.0758271	0.0542765	S
CAATTTCTCTCGTGGG-1_1_1_1_1_1_1	NT1	4116	1393	8.11467	Singlet	0.0169492	3	3	NT	T_cells	0.046856	-0.007609	S
CACAACAAGCAGTCTT-1_1_1_1_1_1_1	NT1	3914	1242	4.85437	Singlet	0.0141243	12	12	NT	T_cells	0.0501011	0.0757934	G2M
CACACAAAGCACACAG-1_1_1_1_1_1_1	NT1	765	473	8.62745	Singlet	0.0423729	21	21	NT	Others	-0.0189729	-0.00726856	G1
CACACAAAGCCTTCTC-1_1_1_1_1_1_1	NT1	6742	2330	4.58321	Singlet	0.322034	3	3	NT	T_cells	0.0451264	0.00706926	S
CACACAAAGCGCCATC-1_1_1_1_1_1_1	NT1	534	347	10.2996	Singlet	0.0367232	14	14	NT	CAFs	-0.0247077	-0.0482124	G1
CACAGATAGAACCGCA-1_1_1_1_1_1_1	NT1	520	382	0.192308	Singlet	0.101695	22	22	NT	Ductal_cells	-0.02984	-0.0630772	G1
CACAGATAGTTGGCTT-1_1_1_1_1_1_1	NT1	5151	1719	7.06659	Singlet	0.101695	3	3	NT	T_cells	0.033321	-0.057355	S
CACAGGCAGGATACCG-1_1_1_1_1_1_1	NT1	2553	817	10.85	Singlet	0.180791	6	6	NT	Myeloid_cells	0.0029543	0.00792706	G2M
CACAGGCGTACAAGTA-1_1_1_1_1_1_1	NT1	1975	805	1.82278	Singlet	0.0621469	7	7	NT	Myeloid_cells	0.00284769	0.0288735	G2M
CACCAAAAGAGTTGCG-1_1_1_1_1_1_1	NT1	1219	604	13.3716	Singlet	0.0141243	3	3	NT	T_cells	-0.0363423	0.0519516	G2M
CACCAAAAGGTGAGAA-1_1_1_1_1_1_1	NT1	3591	1475	4.84545	Singlet	0.118644	17	17	NT	NK_cells	-0.0409645	-0.081907	G1
CACCGTTCAGGACAGT-1_1_1_1_1_1_1	NT1	3744	1441	9.375	Singlet	0.0451977	3	3	NT	T_cells	0.0846894	-0.0520051	S
CACCGTTGTATGGAAT-1_1_1_1_1_1_1	NT1	3872	1511	3.69318	Singlet	0.251412	9	9	NT	NK_cells	0.0513885	-0.022778	S
CACCGTTTCATGGGAG-1_1_1_1_1_1_1	NT1	1134	556	17.3721	Singlet	0.00847458	2	2	NT	Myeloid_cells	0.0295755	-0.0287714	S
CACGAATAGGTCATCT-1_1_1_1_1_1_1	NT1	31110	1148	2.10222	Singlet	0.265537	10	10	NT	NK_cells	-0.0163461	-0.0379263	G1
CACGAATAGGTCTTTG-1_1_1_1_1_1_1	NT1	4945	1892	5.33873	Singlet	0.288136	9	9	NT	NK_cells	-0.016602	-0.0666296	G1
CACGAATCAAGTGGGT-1_1_1_1_1_1_1	NT1	3356	1214	4.61859	Singlet	0.00847458	3	3	NT	T_cells	0.0292249	-0.00833109	S
CACGAATCAGTGTGCC-1_1_1_1_1_1_1	NT1	809	467	3.21384	Singlet	0.0903955	4	4	NT	Myeloid_cells	0.0390703	-0.0691372	S
CACGAATCATTCACAG-1_1_1_1_1_1_1	NT1	870	471	2.98851	Singlet	0	2	2	NT	Myeloid_cells	-0.0233906	-0.0114963	G1
CACGAATTCCTATGGA-1_1_1_1_1_1_1	NT1	7596	2252	4.09426	Singlet	0.370056	21	21	NT	Others	-0.0304959	-0.0705469	G1
CACGGGTAGGATCACG-1_1_1_1_1_1_1	NT1	2202	845	6.35786	Singlet	0.177966	11	11	NT	Ductal_cells	-0.0504374	0.0139968	G2M
CACGTGGCAACACAGG-1_1_1_1_1_1_1	NT1	2175	981	13.1494	Singlet	0.231638	1	1	NT	Ductal_cells	-0.0551561	-0.0413634	G1
CACGTGGCAACGCATT-1_1_1_1_1_1_1	NT1	4024	1389	7.57952	Singlet	0.0169492	3	3	NT	T_cells	-0.0216982	-0.0573938	G1
CACGTGGGTCACGCTG-1_1_1_1_1_1_1	NT1	3950	1559	4.20253	Singlet	0.265537	9	9	NT	NK_cells	0.0112456	-0.0144048	S
CACGTGGGTCATCTAG-1_1_1_1_1_1_1	NT1	2195	867	5.10251	Singlet	0.135593	4	4	NT	Myeloid_cells	-0.0380668	-0.0976249	G1
CACGTGGTCCATGATG-1_1_1_1_1_1_1	NT1	6083	2002	6.52639	Singlet	0.367232	6	6	NT	Myeloid_cells	-0.0195552	0.0328192	G2M
CACGTTCAGATTACCC-1_1_1_1_1_1_1	NT1	3575	1450	5.76224	Singlet	0.0903955	3	3	NT	T_cells	0.0377408	0.0919091	G2M
CACGTTCGTGTTTCTT-1_1_1_1_1_1_1	NT1	5695	1723	7.84899	Singlet	0.367232	6	6	NT	Myeloid_cells	-0.0295734	-0.0436475	G1
CACGTTCTCCTCACCA-1_1_1_1_1_1_1	NT1	1469	908	9.46222	Singlet	0.234463	20	20	NT	Ductal_cells	-0.0581385	0.137993	G2M
CACGTTCTCTCTGCCA-1_1_1_1_1_1_1	NT1	3185	1027	11.8681	Singlet	0.217514	11	11	NT	Ductal_cells	-0.0440247	-0.0615281	G1
CACTAAGCAAGGTCAG-1_1_1_1_1_1_1	NT1	1772	644	7.22348	Singlet	0.0988701	4	4	NT	Myeloid_cells	-0.0196859	-0.00232804	G1
CACTAAGCACGTCGGT-1_1_1_1_1_1_1	NT1	770	403	9.35065	Singlet	0.0621469	6	6	NT	Myeloid_cells	0.039299	-0.0609209	S
CACTAAGCATCGATAC-1_1_1_1_1_1_1	NT1	4461	1531	4.19189	Singlet	0.0367232	3	3	NT	T_cells	0.0457233	0.0268325	S
CACTGAAGTTTCAGAC-1_1_1_1_1_1_1	NT1	22854	2266	1.60147	Singlet	0.268362	10	10	NT	NK_cells	-0.00569971	-0.0222364	G1
CACTGAATCCCGTAAA-1_1_1_1_1_1_1	NT1	1239	545	4.19693	Singlet	0.0847458	6	6	NT	Myeloid_cells	-0.0238813	-0.0682191	G1
CACTGGGGTGTGTTTG-1_1_1_1_1_1_1	NT1	2061	764	6.79282	Singlet	0.019774	8	8	NT	T_cells	-0.0301361	0.0110583	G2M
CACTGGGTCGCGATCG-1_1_1_1_1_1_1	NT1	1132	423	21.8198	Singlet	0.0649718	0	0	NT	T_cells	-0.0281681	0.0919837	G2M
CACTGTCCAGACTGCC-1_1_1_1_1_1_1	NT1	603	374	4.97512	Singlet	0.0451977	1	1	NT	Ductal_cells	0.048301	-0.0102306	S
CACTGTCTCTACTCAT-1_1_1_1_1_1_1	NT1	5298	1869	4.09589	Singlet	0.257062	9	9	NT	NK_cells	0.0170486	-0.0461006	S
CACTTCGAGTCACAGG-1_1_1_1_1_1_1	NT1	3716	1318	6.29709	Singlet	0.00847458	3	3	NT	T_cells	0.0454873	-0.0802018	S
CACTTCGAGTGATGGC-1_1_1_1_1_1_1	NT1	3705	1290	5.23617	Singlet	0.0141243	3	3	NT	T_cells	0.0502711	-0.0599133	S
CACTTCGGTGAAGCGT-1_1_1_1_1_1_1	NT1	2200	1051	2.77273	Singlet	0.194915	4	4	NT	Myeloid_cells	0.0927656	0.54389	G2M
CACTTCGGTGCGAACA-1_1_1_1_1_1_1	NT1	1968	748	4.57317	Singlet	0.135593	4	4	NT	Myeloid_cells	-0.0264749	-0.0528272	G1
CACTTCGTCTCCGTGT-1_1_1_1_1_1_1	NT1	4412	1554	4.60109	Singlet	0.079096	0	0	NT	T_cells	-0.0556736	0.0650907	G2M
CAGAGCCTCTAATTCC-1_1_1_1_1_1_1	NT1	25839	1021	0.417973	Singlet	0.259887	10	10	NT	NK_cells	-0.0132979	-0.0349741	G1
CAGATACAGCTTACGT-1_1_1_1_1_1_1	NT1	1472	704	8.76359	Singlet	0.107345	1	1	NT	Ductal_cells	-0.0233939	-0.0036973	G1
CAGATACAGTACTGGG-1_1_1_1_1_1_1	NT1	678	426	0.884956	Singlet	0	7	7	NT	Myeloid_cells	-0.0254787	-0.0202967	G1
CAGATACAGTATTGCC-1_1_1_1_1_1_1	NT1	10928	590	0.823572	Singlet	0.251412	10	10	NT	NK_cells	0.00417778	-0.0250194	S
CAGATACGTACCCGAC-1_1_1_1_1_1_1	NT1	655	362	2.1374	Singlet	0.00282486	2	2	NT	Myeloid_cells	0.0725288	0.0627558	S
CAGATCAAGCCGGAAT-1_1_1_1_1_1_1	NT1	2495	993	3.8477	Singlet	0.0254237	17	17	NT	NK_cells	-0.0364593	-0.0417543	G1
CAGATTGCACTTGTCC-1_1_1_1_1_1_1	NT1	6246	1904	5.71566	Singlet	0.146893	3	3	NT	T_cells	-0.00827011	-0.100658	G1
CAGATTGTCCACACAA-1_1_1_1_1_1_1	NT1	5747	1925	5.18531	Singlet	0.367232	6	6	NT	Myeloid_cells	-0.0106119	-0.0269932	G1
CAGATTGTCGATACAC-1_1_1_1_1_1_1	NT1	1830	839	2.95082	Singlet	0.0734463	7	7	NT	Myeloid_cells	-0.0469492	0.0985092	G2M
CAGCAATCAGTGAGCA-1_1_1_1_1_1_1	NT1	4865	1584	4.00822	Singlet	0.0480226	8	8	NT	T_cells	0.0740165	-0.0260728	S
CAGCAATGTCTGTCCT-1_1_1_1_1_1_1	NT1	3667	1404	8.18107	Singlet	0.0282486	3	3	NT	T_cells	0.044679	0.0225509	S
CAGCAATTCCGTGCGA-1_1_1_1_1_1_1	NT1	5252	1844	7.1211	Singlet	0.361582	6	6	NT	Myeloid_cells	0.124524	-0.0575387	S
CAGCACGAGACGGTCA-1_1_1_1_1_1_1	NT1	3968	1541	6.65323	Singlet	0.254237	9	9	NT	NK_cells	-0.0700848	0.00579431	G2M
CAGCACGAGGTTCCAT-1_1_1_1_1_1_1	NT1	3058	1192	5.26488	Singlet	0.0169492	0	0	NT	T_cells	-0.0141096	0.00857866	G2M
CAGCACGCAAATGAGT-1_1_1_1_1_1_1	NT1	792	353	1.64141	Singlet	0.0564972	18	18	NT	T_cells	-0.0112656	0.0446775	G2M
CAGCACGTCGTGTGAT-1_1_1_1_1_1_1	NT1	3813	1326	6.97613	Singlet	0.344633	6	6	NT	Myeloid_cells	0.00953427	-0.0868368	S
CAGCCAGAGGGATCTG-1_1_1_1_1_1_1	NT1	688	418	0.436047	Singlet	0.0960452	22	22	NT	Ductal_cells	-0.0156181	-0.0691759	G1
CAGCCAGCACTGCACG-1_1_1_1_1_1_1	NT1	1088	443	1.01103	Singlet	0.0536723	1	1	NT	Ductal_cells	0.024743	-0.0565574	S
CAGCCAGCATAGAGGC-1_1_1_1_1_1_1	NT1	2635	1125	11.537	Singlet	0.259887	11	11	NT	Ductal_cells	-0.0578087	-0.0191269	G1
CAGCCAGCATCTAACG-1_1_1_1_1_1_1	NT1	4409	1560	5.44341	Singlet	0.0480226	3	3	NT	T_cells	-0.0191477	-0.0597705	G1
CAGCCAGGTCAGTTTG-1_1_1_1_1_1_1	NT1	501	336	5.98802	Singlet	0.00282486	2	2	NT	Myeloid_cells	-0.0195713	0.000355294	G2M
CAGCCAGTCACGACTA-1_1_1_1_1_1_1	NT1	1690	766	1.42012	Singlet	0.059322	7	7	NT	Myeloid_cells	0.0194194	-0.000867313	S
CAGCGTGTCGATGCAT-1_1_1_1_1_1_1	NT1	607	365	5.27183	Singlet	0.0508475	14	14	NT	CAFs	0.0489809	-0.0599971	S
CAGGCCAAGCCTAACT-1_1_1_1_1_1_1	NT1	679	463	2.50368	Singlet	0.0988701	1	1	NT	Ductal_cells	-0.0388146	-0.0620399	G1
CAGGCCACAGAGGCTA-1_1_1_1_1_1_1	NT1	956	511	12.7615	Singlet	0.0536723	15	15	NT	B_cells	0.0302068	-0.0787641	S
CAGGCCACATCTTAGG-1_1_1_1_1_1_1	NT1	4440	1557	6.41892	Singlet	0.112994	3	3	NT	T_cells	-0.0610498	0.0190127	G2M
CAGGCCAGTGTACGCC-1_1_1_1_1_1_1	NT1	623	392	0.481541	Singlet	0.158192	22	22	NT	Ductal_cells	0.0534305	-0.0691117	S
CAGGGCTAGATGCCGA-1_1_1_1_1_1_1	NT1	1053	536	3.60874	Singlet	0.00564972	7	7	NT	Myeloid_cells	-0.0308174	-0.0197661	G1
CAGGGCTAGCATTGAA-1_1_1_1_1_1_1	NT1	4271	1377	9.41232	Singlet	0.158192	0	0	NT	T_cells	-0.0523043	0.0290093	G2M
CAGGGCTCAGGTGACA-1_1_1_1_1_1_1	NT1	4050	1406	6.14815	Singlet	0.0225989	0	0	NT	T_cells	-0.0163735	0.00739948	G2M
CAGGGCTTCGCGTTTC-1_1_1_1_1_1_1	NT1	3634	1160	6.13649	Singlet	0.00847458	3	3	NT	T_cells	0.0803656	-0.045862	S
CAGGTATAGCCTATTG-1_1_1_1_1_1_1	NT1	726	375	4.54545	Singlet	0.0367232	1	1	NT	Ductal_cells	-0.0331839	-0.0606358	G1
CAGGTATAGGCCTTGC-1_1_1_1_1_1_1	NT1	1112	562	10.7914	Singlet	0.0169492	2	2	NT	Myeloid_cells	-0.0291565	0.0125051	G2M
CAGGTATCAATGAGCG-1_1_1_1_1_1_1	NT1	10494	2305	3.421	Singlet	0.0847458	0	0	NT	T_cells	0.0112363	-0.0405023	S
CAGGTATCACTAGGCC-1_1_1_1_1_1_1	NT1	3387	1298	5.63921	Singlet	0.00847458	3	3	NT	T_cells	0.048512	-0.0266729	S
CAGGTATTCAGCAGAG-1_1_1_1_1_1_1	NT1	7616	2419	11.7122	Singlet	0.387006	14	14	NT	CAFs	-0.0577538	-0.0718074	G1
CAGGTATTCCGCAGTG-1_1_1_1_1_1_1	NT1	795	497	6.41509	Singlet	0.0932203	4	4	NT	Myeloid_cells	0.037449	-0.0843446	S
CAGGTATTCTTGAGCA-1_1_1_1_1_1_1	NT1	510	357	2.94118	Singlet	0.0423729	19	19	NT	Myeloid_cells	-0.0283756	-0.0580214	G1
CAGTGCGAGTGTTCAC-1_1_1_1_1_1_1	NT1	799	342	25.7822	Singlet	0.00847458	2	2	NT	Myeloid_cells	-0.0176478	-0.0496902	G1
CAGTTAGCAGAAGCTG-1_1_1_1_1_1_1	NT1	3165	1359	4.54976	Singlet	0.248588	9	9	NT	NK_cells	-0.0737959	-0.0513297	G1
CAGTTCCCACGAGGAT-1_1_1_1_1_1_1	NT1	1840	955	0.48913	Singlet	0.189266	21	21	NT	Others	0.0486022	-0.0722591	S
CAGTTCCGTATGTCTG-1_1_1_1_1_1_1	NT1	798	411	3.00752	Singlet	0.00282486	2	2	NT	Myeloid_cells	-0.0160506	0.0484327	G2M
CATAAGCAGAACCCGA-1_1_1_1_1_1_1	NT1	4844	1757	3.59207	Singlet	0.20904	3	3	NT	T_cells	-0.0270145	0.0363337	G2M
CATAAGCCAAACACGG-1_1_1_1_1_1_1	NT1	5571	1616	4.82858	Singlet	0.237288	13	13	NT	B_cells	-0.0217414	-0.0614819	G1
CATAAGCTCACTCTTA-1_1_1_1_1_1_1	NT1	778	409	6.2982	Singlet	0.0423729	4	4	NT	Myeloid_cells	-0.0256706	-0.0103613	G1
CATACAGAGTAGTCTC-1_1_1_1_1_1_1	NT1	4706	1877	3.39992	Singlet	0.29661	9	9	NT	NK_cells	-0.00290121	-0.10413	G1
CATACAGAGTTGCATC-1_1_1_1_1_1_1	NT1	1073	594	15.0047	Singlet	0.144068	14	14	NT	CAFs	-0.0297944	-0.0232415	G1
CATACAGCAAACCACT-1_1_1_1_1_1_1	NT1	3977	1556	5.95927	Singlet	0.0875706	8	8	NT	T_cells	6.60393e-05	-0.0305343	S
CATACAGCAACCCGCA-1_1_1_1_1_1_1	NT1	1318	581	6.44917	Singlet	0.0875706	4	4	NT	Myeloid_cells	-0.0191378	-0.0715361	G1
CATACAGCACCTCGTT-1_1_1_1_1_1_1	NT1	568	351	7.74648	Singlet	0.039548	4	4	NT	Myeloid_cells	-0.0152308	-0.058981	G1
CATACAGGTAACACCT-1_1_1_1_1_1_1	NT1	2468	1356	5.83468	Singlet	0.30226	20	20	NT	Ductal_cells	0.177599	0.0411992	S
CATACCCCATTCGGGC-1_1_1_1_1_1_1	NT1	575	399	4.86957	Singlet	0.0564972	14	14	NT	CAFs	-0.0329569	-0.0574182	G1
CATACTTAGCTCTTCC-1_1_1_1_1_1_1	NT1	1818	856	11.0011	Singlet	0.240113	11	11	NT	Ductal_cells	-0.0576669	-0.0561167	G1
CATACTTCAGCGTGAA-1_1_1_1_1_1_1	NT1	1125	529	6.22222	Singlet	0.0338983	18	18	NT	T_cells	0.0371245	-0.0827974	S
CATACTTGTAGCTGAG-1_1_1_1_1_1_1	NT1	1963	929	6.06215	Singlet	0.214689	4	4	NT	Myeloid_cells	0.0408296	0.0408757	G2M
CATACTTGTTCCTTGC-1_1_1_1_1_1_1	NT1	2884	1316	4.71567	Singlet	0.0847458	17	17	NT	NK_cells	0.0740955	-0.0117611	S
CATACTTGTTGCTCGG-1_1_1_1_1_1_1	NT1	2562	1012	7.53318	Singlet	0.00564972	3	3	NT	T_cells	0.0828634	-0.0380998	S
CATACTTTCGACATCA-1_1_1_1_1_1_1	NT1	7051	2096	14.3526	Singlet	0.19209	3	3	NT	T_cells	0.0210751	-0.0601308	S
CATAGACAGACCAAGC-1_1_1_1_1_1_1	NT1	4308	1889	2.36769	Singlet	0.353107	21	21	NT	Others	-0.0753431	-0.0472532	G1
CATAGACCAGAATGTA-1_1_1_1_1_1_1	NT1	10511	2400	6.86899	Singlet	0.344633	4	4	NT	Myeloid_cells	-0.00834548	-0.0689803	G1
CATCAAGAGATGCGAC-1_1_1_1_1_1_1	NT1	708	384	10.452	Singlet	0.00282486	2	2	NT	Myeloid_cells	-0.0251045	0.0412024	G2M
CATCCACCAATCTCGA-1_1_1_1_1_1_1	NT1	859	479	3.2596	Singlet	0	2	2	NT	Myeloid_cells	-0.0273779	-0.0173564	G1
CATCCACTCTCGTCGT-1_1_1_1_1_1_1	NT1	3218	1236	6.65009	Singlet	0.0141243	3	3	NT	T_cells	-0.0131636	0.0156375	G2M
CATCCCAAGGCACGAT-1_1_1_1_1_1_1	NT1	3242	1207	7.46453	Singlet	0.0141243	3	3	NT	T_cells	-0.0171879	-0.0340634	G1
CATCCGTAGATGCGAC-1_1_1_1_1_1_1	NT1	4400	1461	9.72727	Singlet	0.0225989	3	3	NT	T_cells	-0.0167224	-0.0446207	G1
CATCCGTCAGTCGAGA-1_1_1_1_1_1_1	NT1	4455	320	2.60382	Singlet	0.228814	10	10	NT	NK_cells	-0.0127031	-0.0284798	G1
CATCCGTGTGAAGCGT-1_1_1_1_1_1_1	NT1	1569	919	5.92734	Singlet	0.20904	20	20	NT	Ductal_cells	-0.0663202	0.0513246	G2M
CATCGCTGTCGGTAAG-1_1_1_1_1_1_1	NT1	7845	2257	9.50924	Singlet	0.358757	14	14	NT	CAFs	0.00944811	-0.0796402	S
CATCGCTTCCGGACGT-1_1_1_1_1_1_1	NT1	3934	1388	8.79512	Singlet	0.019774	3	3	NT	T_cells	0.0649135	-0.0137935	S
CATCGGGCATCATGAC-1_1_1_1_1_1_1	NT1	1097	629	8.75114	Singlet	0.0762712	23	23	NT	T_cells	0.253221	0.336671	G2M
CATCGTCAGAACTGAT-1_1_1_1_1_1_1	NT1	7610	2373	12.2865	Singlet	0.375706	14	14	NT	CAFs	-0.0128716	-0.0344651	G1
CATCGTCGTAAGAACT-1_1_1_1_1_1_1	NT1	4411	1545	4.19406	Singlet	0.194915	9	9	NT	NK_cells	0.0284207	-0.0837246	S
CATCGTCTCGGCCTTT-1_1_1_1_1_1_1	NT1	1371	843	4.74106	Singlet	0.183616	20	20	NT	Ductal_cells	-0.0367949	-0.0283885	G1
CATGAGTCACAAATCC-1_1_1_1_1_1_1	NT1	4029	1480	4.34351	Singlet	0.115819	17	17	NT	NK_cells	0.0709257	0.0930672	G2M
CATGAGTCAGCAGACA-1_1_1_1_1_1_1	NT1	2229	904	5.92194	Singlet	0.146893	4	4	NT	Myeloid_cells	-0.0359282	-0.0972124	G1
CATGCAAAGCAGTAAT-1_1_1_1_1_1_1	NT1	3736	1324	7.33405	Singlet	0.039548	3	3	NT	T_cells	0.0285748	-0.0593474	S
CATGCCTAGGTGTGAC-1_1_1_1_1_1_1	NT1	8123	2472	7.16484	Singlet	0.381356	14	14	NT	CAFs	-0.019365	-0.0826699	G1
CATGCCTAGTATTAGG-1_1_1_1_1_1_1	NT1	2754	1093	2.43282	Singlet	0.0480226	0	0	NT	T_cells	-0.0435689	-0.00996067	G1
CATGCCTCAATAGTGA-1_1_1_1_1_1_1	NT1	6751	2291	8.97645	Singlet	0.384181	14	14	NT	CAFs	-0.0359802	-0.0536132	G1
CATGCGGAGCCTCAGC-1_1_1_1_1_1_1	NT1	3241	1184	5.80068	Singlet	0.00282486	0	0	NT	T_cells	0.0578639	0.0649314	G2M
CATGCTCCATGCGGTC-1_1_1_1_1_1_1	NT1	3889	1333	8.63975	Singlet	0.0112994	3	3	NT	T_cells	0.0679103	0.0126457	S
CATGGATGTCCTCCAT-1_1_1_1_1_1_1	NT1	3492	1396	6.07102	Singlet	0.0480226	3	3	NT	T_cells	-0.0142126	-0.0342909	G1
CATGGTACACTAACGT-1_1_1_1_1_1_1	NT1	5992	2045	6.04139	Singlet	0.370056	6	6	NT	Myeloid_cells	-0.00266743	-0.122997	G1
CATTCATTCGTTCCTG-1_1_1_1_1_1_1	NT1	6599	2077	4.01576	Singlet	0.372881	6	6	NT	Myeloid_cells	-0.0113128	-0.0155938	G1
CATTCCGAGCATGAAT-1_1_1_1_1_1_1	NT1	1773	800	0.394811	Singlet	0.0649718	7	7	NT	Myeloid_cells	0.0170308	-0.0079084	S
CATTCCGCATGACCCG-1_1_1_1_1_1_1	NT1	8751	1904	0.319963	Singlet	0.262712	24	24	NT	Others	-0.0257878	-0.125676	G1
CATTCCGTCAAGCCTA-1_1_1_1_1_1_1	NT1	860	455	4.06977	Singlet	0.0508475	25	25	NT	Others	-0.0298804	-0.0616389	G1
CATTCCGTCTGAATCG-1_1_1_1_1_1_1	NT1	4764	1647	7.55668	Singlet	0.355932	6	6	NT	Myeloid_cells	-0.0258837	-0.0187335	G1
CATTCTAAGACTAGAT-1_1_1_1_1_1_1	NT1	1417	616	17.9958	Singlet	0.115819	1	1	NT	Ductal_cells	0.00947378	-0.0777994	S
CATTCTAAGTGCCAGA-1_1_1_1_1_1_1	NT1	3572	1384	8.1467	Singlet	0.0225989	3	3	NT	T_cells	0.0224832	0.0401455	G2M
CATTCTACAACCACGC-1_1_1_1_1_1_1	NT1	25522	862	1.32827	Singlet	0.259887	10	10	NT	NK_cells	-0.00708373	-0.0363933	G1
CATTCTACAAGCACAG-1_1_1_1_1_1_1	NT1	3397	1261	5.23992	Singlet	0.0141243	3	3	NT	T_cells	-0.00308082	-0.0805568	G1
CATTCTACAGAGTAAT-1_1_1_1_1_1_1	NT1	1511	716	4.23561	Singlet	0.115819	4	4	NT	Myeloid_cells	-0.0345051	-0.0355629	G1
CATTCTAGTCATTCCC-1_1_1_1_1_1_1	NT1	4787	1692	5.91184	Singlet	0.135593	3	3	NT	T_cells	-0.0477895	-0.0371016	G1
CATTCTATCTCACTCG-1_1_1_1_1_1_1	NT1	6709	2268	5.45536	Singlet	0.381356	14	14	NT	CAFs	-0.0187924	-0.0505355	G1
CATTGAGGTCTAGGCC-1_1_1_1_1_1_1	NT1	812	424	5.41872	Singlet	0.059322	1	1	NT	Ductal_cells	-0.0309529	0.0309814	G2M
CATTGAGTCTGGGCCA-1_1_1_1_1_1_1	NT1	676	459	3.25444	Singlet	0.0480226	19	19	NT	Myeloid_cells	0.11506	0.221495	G2M
CATTGCCAGCCACAAG-1_1_1_1_1_1_1	NT1	4592	1569	2.91812	Singlet	0.0536723	0	0	NT	T_cells	-0.00920155	-0.00537178	G1
CATTGCCCATGTGCCG-1_1_1_1_1_1_1	NT1	4555	1450	6.23491	Singlet	0.0310734	8	8	NT	T_cells	0.00819488	-0.0305458	S
CATTGTTAGTCTCTGA-1_1_1_1_1_1_1	NT1	829	462	5.54885	Singlet	0.079096	4	4	NT	Myeloid_cells	-0.0158334	0.0385724	G2M
CATTTCATCATTACCT-1_1_1_1_1_1_1	NT1	6085	2288	3.0567	Singlet	0.313559	9	9	NT	NK_cells	-0.0220296	-0.0429955	G1
CATTTCATCTTGCGCT-1_1_1_1_1_1_1	NT1	1090	576	1.92661	Singlet	0.10452	1	1	NT	Ductal_cells	-0.0347009	0.0616141	G2M
CCAAGCGAGTTACGGG-1_1_1_1_1_1_1	NT1	7775	2467	6.89389	Singlet	0.387006	4	4	NT	Myeloid_cells	-0.0389297	-0.0427064	G1
CCAAGCGCAATGGCCC-1_1_1_1_1_1_1	NT1	732	422	2.73224	Singlet	0	2	2	NT	Myeloid_cells	-0.0304287	0.0198998	G2M
CCAAGCGGTCGTTATG-1_1_1_1_1_1_1	NT1	1205	616	0.746888	Singlet	0.0282486	16	16	NT	Myeloid_cells	-0.0241428	-0.0802575	G1
CCAAGCGTCATTCCTA-1_1_1_1_1_1_1	NT1	3451	1296	6.98348	Singlet	0.0225989	3	3	NT	T_cells	-0.0245467	0.0594554	G2M
CCAAGCGTCCGTATAG-1_1_1_1_1_1_1	NT1	1178	542	2.12224	Singlet	0.0141243	2	2	NT	Myeloid_cells	-0.0300904	0.0545168	G2M
CCAATGAAGCTAAACA-1_1_1_1_1_1_1	NT1	3684	1444	4.69598	Singlet	0.0451977	8	8	NT	T_cells	-0.01917	0.0768959	G2M
CCAATGAAGTATGGCG-1_1_1_1_1_1_1	NT1	3447	1262	7.10763	Singlet	0.0141243	3	3	NT	T_cells	0.115295	-0.0631956	S
CCAATGAGTAGAGGAA-1_1_1_1_1_1_1	NT1	562	384	6.22776	Singlet	0.0367232	23	23	NT	T_cells	0.0516483	0.3409	G2M
CCAATTTCAAGTATCC-1_1_1_1_1_1_1	NT1	4405	1434	5.13053	Singlet	0.019774	0	0	NT	T_cells	0.0156811	0.00854705	S
CCAATTTCATGACTAC-1_1_1_1_1_1_1	NT1	907	481	4.07938	Singlet	0.079096	4	4	NT	Myeloid_cells	-0.0176578	-0.0155544	G1
CCAATTTGTCTGTTAG-1_1_1_1_1_1_1	NT1	7547	1754	4.12084	Singlet	0.0480226	0	0	NT	T_cells	0.00152982	-0.09472	S
CCACAAACAACCGACC-1_1_1_1_1_1_1	NT1	635	353	27.7165	Singlet	0.0819209	18	18	NT	T_cells	-0.0344615	-0.0625731	G1
CCACAAATCCCAATAG-1_1_1_1_1_1_1	NT1	2661	1215	4.472	Singlet	0.0423729	17	17	NT	NK_cells	-0.0581196	-0.0250107	G1
CCACAAATCCTCAGGG-1_1_1_1_1_1_1	NT1	5040	1777	10.0992	Singlet	0.361582	6	6	NT	Myeloid_cells	0.0171519	0.0149986	S
CCACACTGTTTAGAGA-1_1_1_1_1_1_1	NT1	1970	874	16.802	Singlet	0.217514	11	11	NT	Ductal_cells	-0.0504963	-0.022823	G1
CCACACTTCCGTGGTG-1_1_1_1_1_1_1	NT1	4480	1464	5.11161	Singlet	0.0282486	0	0	NT	T_cells	0.146424	-0.0381608	S
CCACCATAGCGCCCAT-1_1_1_1_1_1_1	NT1	5188	1654	7.18967	Singlet	0.240113	13	13	NT	B_cells	0.0222298	0.0789874	G2M
CCACGAGAGTTAACGA-1_1_1_1_1_1_1	NT1	1312	659	3.73476	Singlet	0.112994	4	4	NT	Myeloid_cells	0.0270534	-0.0353856	S
CCACGAGCACTGGATT-1_1_1_1_1_1_1	NT1	4208	1474	4.30133	Singlet	0.0367232	8	8	NT	T_cells	0.0583363	-0.022336	S
CCACGAGGTTTGCAGT-1_1_1_1_1_1_1	NT1	1120	597	0.982143	Singlet	0.0338983	2	2	NT	Myeloid_cells	-0.0315099	0.0271622	G2M
CCACGTTAGGTCCAGA-1_1_1_1_1_1_1	NT1	8003	2272	8.65925	Singlet	0.333333	14	14	NT	CAFs	-0.0300503	-0.0669411	G1
CCACGTTGTCTCGCGA-1_1_1_1_1_1_1	NT1	694	306	4.17867	Singlet	0.00847458	2	2	NT	Myeloid_cells	-0.0151081	-0.0448868	G1
CCACGTTGTGCCTATA-1_1_1_1_1_1_1	NT1	3605	1177	5.32594	Singlet	0.0367232	17	17	NT	NK_cells	-0.00397791	-0.011134	G1
CCACTTGGTAGACGGT-1_1_1_1_1_1_1	NT1	2197	849	5.82613	Singlet	0.0169492	8	8	NT	T_cells	-0.0383896	0.0208211	G2M
CCACTTGGTATCCCTC-1_1_1_1_1_1_1	NT1	915	429	0.983607	Singlet	0.0112994	2	2	NT	Myeloid_cells	-0.0141473	-0.0251611	G1
CCACTTGTCGTAATGC-1_1_1_1_1_1_1	NT1	969	538	1.65119	Singlet	0.00564972	2	2	NT	Myeloid_cells	-0.0262154	0.062922	G2M
CCATAAGGTAACAGGC-1_1_1_1_1_1_1	NT1	1463	623	0.615174	Singlet	0.0225989	2	2	NT	Myeloid_cells	-0.0337517	-0.0269356	G1
CCATAAGTCCGCATAA-1_1_1_1_1_1_1	NT1	953	489	4.617	Singlet	0.0621469	1	1	NT	Ductal_cells	-0.0184533	0.0167496	G2M
CCATCACCAACCGACC-1_1_1_1_1_1_1	NT1	550	352	3.63636	Singlet	0	2	2	NT	Myeloid_cells	-0.0115755	0.215374	G2M
CCATCACCAAGAAACT-1_1_1_1_1_1_1	NT1	754	478	11.2732	Singlet	0.0169492	2	2	NT	Myeloid_cells	-0.0335599	0.0203953	G2M
CCATCACGTCATATGC-1_1_1_1_1_1_1	NT1	3321	1291	5.5405	Singlet	0.0169492	3	3	NT	T_cells	0.0190692	-0.0212353	S
CCATCACGTGGACTGA-1_1_1_1_1_1_1	NT1	1320	700	4.39394	Singlet	0.0282486	7	7	NT	Myeloid_cells	-0.0333552	0.00145607	G2M
CCCAACTAGACCTGGA-1_1_1_1_1_1_1	NT1	1839	799	0.598151	Singlet	0.059322	16	16	NT	Myeloid_cells	0.00879572	0.0246283	G2M
CCCAACTGTCTACTGA-1_1_1_1_1_1_1	NT1	4110	1611	5.57178	Singlet	0.155367	3	3	NT	T_cells	0.0568558	0.00405331	S
CCCAACTTCGAGAAAT-1_1_1_1_1_1_1	NT1	5933	1865	6.27002	Singlet	0.355932	6	6	NT	Myeloid_cells	-0.041632	-0.00928424	G1
CCCAACTTCTCGGTAA-1_1_1_1_1_1_1	NT1	2750	1193	5.2	Singlet	0.183616	12	12	NT	T_cells	0.0968738	-0.00364602	S
CCCAACTTCTGATGGT-1_1_1_1_1_1_1	NT1	700	456	4.14286	Singlet	0.0621469	1	1	NT	Ductal_cells	-0.023929	0.0428042	G2M
CCCATTGCAATTCTTC-1_1_1_1_1_1_1	NT1	3955	1572	5.53729	Singlet	0.189266	3	3	NT	T_cells	-0.0144758	-0.071645	G1
CCCATTGGTCTAATCG-1_1_1_1_1_1_1	NT1	6355	791	2.0299	Singlet	0.135593	24	24	NT	Others	0.00280427	-0.0556959	S
CCCATTGTCTATCCAT-1_1_1_1_1_1_1	NT1	5429	1921	3.16817	Singlet	0.228814	3	3	NT	T_cells	0.0172932	-0.0347665	S
CCCGAAGCACTTGAGT-1_1_1_1_1_1_1	NT1	1197	640	4.92899	Singlet	0.0282486	2	2	NT	Myeloid_cells	0.0751474	-0.0309781	S
CCCGAAGCAGAGTTCT-1_1_1_1_1_1_1	NT1	1392	598	1.79598	Singlet	0.0141243	7	7	NT	Myeloid_cells	-0.0398699	0.154907	G2M
CCCGAAGCATTGAGGG-1_1_1_1_1_1_1	NT1	6352	1855	5.54156	Singlet	0.158192	3	3	NT	T_cells	0.0173581	-0.022444	S
CCCGGAAAGATCGCCC-1_1_1_1_1_1_1	NT1	13281	781	0.120473	Singlet	0.265537	10	10	NT	NK_cells	0.0132667	-0.0384537	S
CCCGGAAAGGCAGTCA-1_1_1_1_1_1_1	NT1	1648	733	6.61408	Singlet	0.0621469	7	7	NT	Myeloid_cells	-0.0300903	0.0142696	G2M
CCCGGAAAGGTTCTAC-1_1_1_1_1_1_1	NT1	30668	1447	0.345637	Singlet	0.274011	10	10	NT	NK_cells	-0.0219764	-0.0382409	G1
CCCGGAACAGACAAGC-1_1_1_1_1_1_1	NT1	610	374	6.72131	Singlet	0.0734463	4	4	NT	Myeloid_cells	-0.0219441	-0.065691	G1
CCCGGAAGTTTGATCG-1_1_1_1_1_1_1	NT1	737	402	13.7042	Singlet	0.0903955	1	1	NT	Ductal_cells	-0.0343737	-0.0727521	G1
CCCTAACAGAAACCCG-1_1_1_1_1_1_1	NT1	3693	1451	6.90496	Singlet	0.0677966	3	3	NT	T_cells	0.0841864	-0.0336111	S
CCCTAACCATGGAAGC-1_1_1_1_1_1_1	NT1	1116	722	8.33333	Singlet	0.211864	11	11	NT	Ductal_cells	-0.0591266	-0.0310699	G1
CCCTAACTCGGAACTT-1_1_1_1_1_1_1	NT1	1596	711	1.31579	Singlet	0.0564972	2	2	NT	Myeloid_cells	-0.0408682	-0.0111167	G1
CCCTCAAAGATCGCTT-1_1_1_1_1_1_1	NT1	4679	1686	3.20581	Singlet	0.237288	9	9	NT	NK_cells	0.0134615	-0.00324422	S
CCCTCAACATCGTGCG-1_1_1_1_1_1_1	NT1	965	598	0.310881	Singlet	0.0932203	1	1	NT	Ductal_cells	0.0866764	-0.0326312	S
CCCTCAAGTATGATCC-1_1_1_1_1_1_1	NT1	7282	2020	6.44054	Singlet	0.144068	3	3	NT	T_cells	0.0279882	-0.016517	S
CCCTCAAGTCCAGCGT-1_1_1_1_1_1_1	NT1	5028	1734	4.73349	Singlet	0.118644	3	3	NT	T_cells	-0.0572131	0.0733338	G2M
CCCTCAATCCTGGGAC-1_1_1_1_1_1_1	NT1	6460	2003	5.89783	Singlet	0.183616	3	3	NT	T_cells	-0.00924261	0.012758	G2M
CCCTCTCCAATCCTAG-1_1_1_1_1_1_1	NT1	4319	1573	5.97361	Singlet	0.124294	3	3	NT	T_cells	0.123841	-0.015422	S
CCCTGATAGACGAAGA-1_1_1_1_1_1_1	NT1	2796	1123	6.83119	Singlet	0.00564972	3	3	NT	T_cells	-0.012162	-0.0668065	G1
CCCTGATAGCAACAGC-1_1_1_1_1_1_1	NT1	4052	1436	5.30602	Singlet	0.039548	0	0	NT	T_cells	-0.0580784	0.0262262	G2M
CCCTGATCACACTTAG-1_1_1_1_1_1_1	NT1	1214	719	9.55519	Singlet	0.180791	11	11	NT	Ductal_cells	-0.0446832	0.0400613	G2M
CCCTTAGCACACACTA-1_1_1_1_1_1_1	NT1	1247	641	4.73136	Singlet	0.10452	1	1	NT	Ductal_cells	-0.0404743	0.000146075	G2M
CCCTTAGCACCGTCGA-1_1_1_1_1_1_1	NT1	594	368	4.20875	Singlet	0.00282486	7	7	NT	Myeloid_cells	-0.0213025	0.183326	G2M
CCCTTAGGTAATGCTC-1_1_1_1_1_1_1	NT1	5325	1702	6.47887	Singlet	0.355932	6	6	NT	Myeloid_cells	-0.0352112	-0.0511289	G1
CCCTTAGGTCCCGCAA-1_1_1_1_1_1_1	NT1	1448	544	18.8536	Singlet	0.0706215	1	1	NT	Ductal_cells	-0.0262528	-0.0292728	G1
CCCTTAGGTCCTCAGG-1_1_1_1_1_1_1	NT1	4640	1568	4.82759	Singlet	0.0649718	0	0	NT	T_cells	-0.0165949	-0.0161579	G1
CCCTTAGGTCTGTTAG-1_1_1_1_1_1_1	NT1	905	437	3.09392	Singlet	0.0734463	4	4	NT	Myeloid_cells	-0.0305949	-0.0682585	G1
CCGAACGTCCAACCGG-1_1_1_1_1_1_1	NT1	4799	1442	6.48052	Singlet	0.200565	13	13	NT	B_cells	0.00212662	-0.0182679	S
CCGATCTAGCAATTCC-1_1_1_1_1_1_1	NT1	634	333	2.68139	Singlet	0.039548	4	4	NT	Myeloid_cells	-0.00735794	0.00595165	G2M
CCGATCTGTACGATGG-1_1_1_1_1_1_1	NT1	3409	1362	6.39484	Singlet	0.0254237	3	3	NT	T_cells	0.0107239	-0.0134816	S
CCGATCTGTCGATGCC-1_1_1_1_1_1_1	NT1	1491	809	10.0604	Singlet	0.228814	11	11	NT	Ductal_cells	-0.0422314	-0.017411	G1
CCGATCTTCGCGGACT-1_1_1_1_1_1_1	NT1	4323	1354	6.01434	Singlet	0.0112994	3	3	NT	T_cells	-0.0337936	-0.0601676	G1
CCGATCTTCTGTAAGC-1_1_1_1_1_1_1	NT1	1598	720	4.69337	Singlet	0.107345	1	1	NT	Ductal_cells	-0.0380211	-0.0526048	G1
CCGATGGCAAGCCATT-1_1_1_1_1_1_1	NT1	3468	999	20.4729	Singlet	0.0988701	4	4	NT	Myeloid_cells	-0.035018	-0.0155987	G1
CCGATGGTCGGTTCAA-1_1_1_1_1_1_1	NT1	1488	714	5.71237	Singlet	0.0141243	0	0	NT	T_cells	0.0276574	0.00366765	S
CCGCAAGCAATACAGA-1_1_1_1_1_1_1	NT1	2311	961	7.78884	Singlet	0.00847458	3	3	NT	T_cells	-0.00323213	0.0761697	G2M
CCGCAAGGTACTCGCG-1_1_1_1_1_1_1	NT1	920	566	7.28261	Singlet	0.152542	11	11	NT	Ductal_cells	0.0867145	-0.0202999	S
CCGGACAGTTGCCGAC-1_1_1_1_1_1_1	NT1	635	404	5.03937	Singlet	0.0254237	23	23	NT	T_cells	0.185324	0.189693	G2M
CCGGACATCAAAGAAC-1_1_1_1_1_1_1	NT1	4131	1444	6.34229	Singlet	0.019774	3	3	NT	T_cells	0.0137195	-0.0188019	S
CCGGACATCCTACGAA-1_1_1_1_1_1_1	NT1	2039	884	1.37322	Singlet	0.079096	7	7	NT	Myeloid_cells	-0.0293033	0.0230389	G2M
CCGGACATCGGTGTAT-1_1_1_1_1_1_1	NT1	5134	312	0.019478	Singlet	0.237288	10	10	NT	NK_cells	-0.00762838	-0.0120238	G1
CCGGGTAGTGTTAGCT-1_1_1_1_1_1_1	NT1	3106	1143	7.88796	Singlet	0.019774	3	3	NT	T_cells	0.0501686	-0.0456224	S
CCGGGTATCAGACATC-1_1_1_1_1_1_1	NT1	3459	1270	7.66117	Singlet	0.00564972	3	3	NT	T_cells	0.0591689	0.041118	S
CCGGTAGAGGATTCAA-1_1_1_1_1_1_1	NT1	4894	1568	5.96649	Singlet	0.344633	6	6	NT	Myeloid_cells	0.0526469	-0.00139614	S
CCGGTAGCACATCCCT-1_1_1_1_1_1_1	NT1	3973	1381	9.84143	Singlet	0.338983	6	6	NT	Myeloid_cells	0.0692483	0.0698234	G2M
CCGGTAGCAGAGGGTT-1_1_1_1_1_1_1	NT1	983	534	8.74873	Singlet	0.0141243	2	2	NT	Myeloid_cells	-0.0397014	-0.0324847	G1
CCGGTAGCATCCGAGC-1_1_1_1_1_1_1	NT1	3807	1442	6.25164	Singlet	0.0706215	8	8	NT	T_cells	0.0173694	-0.0445446	S
CCGGTAGGTCTCTCCA-1_1_1_1_1_1_1	NT1	11134	748	0.323334	Singlet	0.271186	10	10	NT	NK_cells	0.0183017	-0.0431513	S
CCGGTAGGTGCATTAC-1_1_1_1_1_1_1	NT1	3362	525	0.237954	Singlet	0.0451977	19	19	NT	Myeloid_cells	-0.012753	-0.0211642	G1
CCGGTAGTCTTTGATC-1_1_1_1_1_1_1	NT1	750	422	4.66667	Singlet	0.0480226	14	14	NT	CAFs	-0.0245989	-0.0689404	G1
CCGGTGAAGTGCACTT-1_1_1_1_1_1_1	NT1	879	512	2.16155	Singlet	0.0819209	20	20	NT	Ductal_cells	-0.0355482	0.0250937	G2M
CCGGTGAGTTAGCGGA-1_1_1_1_1_1_1	NT1	3274	1266	5.3146	Singlet	0.0169492	3	3	NT	T_cells	0.0966803	-0.0409341	S
CCGGTGATCATTTGCT-1_1_1_1_1_1_1	NT1	7192	2007	27.6279	Singlet	0.274011	13	13	NT	B_cells	0.00775904	0.0317131	G2M
CCGGTGATCTTTCCGG-1_1_1_1_1_1_1	NT1	3657	1390	8.12141	Singlet	0.0282486	3	3	NT	T_cells	-0.0458192	-0.0139496	G1
CCGTAGGAGACTCGAG-1_1_1_1_1_1_1	NT1	6986	2258	3.6931	Singlet	0.355932	21	21	NT	Others	-0.0335427	-0.0224211	G1
CCGTAGGAGAGTGTTA-1_1_1_1_1_1_1	NT1	1808	724	1.7146	Singlet	0.059322	7	7	NT	Myeloid_cells	0.0163021	0.0195279	G2M
CCGTAGGGTCCAATCA-1_1_1_1_1_1_1	NT1	3736	1377	7.03961	Singlet	0.0169492	3	3	NT	T_cells	0.0148565	-0.046085	S
CCGTAGGGTGACCGTC-1_1_1_1_1_1_1	NT1	12269	2495	4.6051	Singlet	0.310734	14	14	NT	CAFs	-0.051703	-0.0873995	G1
CCGTAGGGTGAGATCG-1_1_1_1_1_1_1	NT1	552	341	0.362319	Singlet	0.0508475	4	4	NT	Myeloid_cells	-0.0290871	-0.0520979	G1
CCGTAGGGTTCGTGCG-1_1_1_1_1_1_1	NT1	3625	1298	5.7931	Singlet	0.350282	6	6	NT	Myeloid_cells	0.0653345	-0.0396527	S
CCGTAGGTCCGTTGGG-1_1_1_1_1_1_1	NT1	1447	562	6.56531	Singlet	0.0677966	6	6	NT	Myeloid_cells	0.0260973	-0.0265495	S
CCGTAGGTCTGCCCTA-1_1_1_1_1_1_1	NT1	3031	630	2.1775	Singlet	0.132768	24	24	NT	Others	-0.0153017	-0.0292448	G1
CCGTGAGAGATGACAT-1_1_1_1_1_1_1	NT1	2850	962	5.78947	Singlet	0.0141243	0	0	NT	T_cells	-0.0279738	-0.0314786	G1
CCGTGAGAGCTAGCCC-1_1_1_1_1_1_1	NT1	3557	1269	8.20917	Singlet	0.0141243	3	3	NT	T_cells	-0.00762635	0.00578897	G2M
CCGTGAGCAGATACTC-1_1_1_1_1_1_1	NT1	1785	876	14.902	Singlet	0.217514	20	20	NT	Ductal_cells	-0.0454044	-0.00308477	G1
CCGTGAGGTAAGGCTG-1_1_1_1_1_1_1	NT1	33655	1312	0.0386272	Singlet	0.268362	10	10	NT	NK_cells	-0.00419671	-0.0393069	G1
CCGTTCACAGTAACAA-1_1_1_1_1_1_1	NT1	3885	1341	6.07465	Singlet	0.00564972	3	3	NT	T_cells	0.0174928	0.0903774	G2M
CCGTTCATCATTACCT-1_1_1_1_1_1_1	NT1	4747	1695	5.18222	Singlet	0.135593	3	3	NT	T_cells	0.0139591	-0.0655113	S
CCTAACCCAGGCAATG-1_1_1_1_1_1_1	NT1	3229	1365	14.6795	Singlet	0.0734463	3	3	NT	T_cells	-0.00769984	-0.0856429	G1
CCTAAGAAGAAGCGCT-1_1_1_1_1_1_1	NT1	7762	2372	5.84901	Singlet	0.389831	4	4	NT	Myeloid_cells	-0.0484676	-0.0477236	G1
CCTAAGAAGAGGTGCT-1_1_1_1_1_1_1	NT1	650	377	2.76923	Singlet	0.00282486	2	2	NT	Myeloid_cells	-0.0283831	-0.0673439	G1
CCTAAGAGTTCAAGTC-1_1_1_1_1_1_1	NT1	891	429	3.92817	Singlet	0.0847458	4	4	NT	Myeloid_cells	0.0384975	0.0010028	S
CCTACGTAGCACCTGC-1_1_1_1_1_1_1	NT1	678	334	3.09735	Singlet	0.0282486	2	2	NT	Myeloid_cells	-0.0152872	-0.0579204	G1
CCTACGTCACGGATCC-1_1_1_1_1_1_1	NT1	2067	884	18.626	Singlet	0.0706215	7	7	NT	Myeloid_cells	-0.0588439	0.127416	G2M
CCTACGTCAGTATACC-1_1_1_1_1_1_1	NT1	4118	1314	5.43953	Singlet	0.0112994	3	3	NT	T_cells	0.0263538	-0.05756	S
CCTACGTGTCACTAGT-1_1_1_1_1_1_1	NT1	1356	714	3.76106	Singlet	0.059322	7	7	NT	Myeloid_cells	-0.034529	0.10328	G2M
CCTACGTTCTTGAACG-1_1_1_1_1_1_1	NT1	2955	553	0.0338409	Singlet	0.231638	10	10	NT	NK_cells	-0.0167086	-0.00218001	G1
CCTATCGAGGGAGATA-1_1_1_1_1_1_1	NT1	1328	598	3.53916	Singlet	0.0254237	2	2	NT	Myeloid_cells	-0.0192704	-0.0229282	G1
CCTATCGTCCATCAGA-1_1_1_1_1_1_1	NT1	975	490	4.51282	Singlet	0.0112994	7	7	NT	Myeloid_cells	-0.0216812	0.0729657	G2M
CCTATCGTCCGCACGA-1_1_1_1_1_1_1	NT1	1385	508	22.6715	Singlet	0.00564972	2	2	NT	Myeloid_cells	-0.0228422	-0.0763347	G1
CCTCAACAGCTAGAAT-1_1_1_1_1_1_1	NT1	2466	1224	7.70479	Singlet	0.293785	4	4	NT	Myeloid_cells	0.0234783	-0.0775256	S
CCTCAACAGCTTACGT-1_1_1_1_1_1_1	NT1	4165	1548	5.16206	Singlet	0.135593	3	3	NT	T_cells	-0.0204399	-0.0584098	G1
CCTCAACAGTGCAACG-1_1_1_1_1_1_1	NT1	4233	1437	6.63832	Singlet	0.0112994	3	3	NT	T_cells	0.0952775	0.0312368	S
CCTCAACCAGACAATA-1_1_1_1_1_1_1	NT1	4100	1587	6.68293	Singlet	0.166667	3	3	NT	T_cells	-0.0259526	0.00327618	G2M
CCTCAACGTTAGTCGT-1_1_1_1_1_1_1	NT1	3185	1250	2.88854	Singlet	0.00564972	3	3	NT	T_cells	0.0260588	0.0516351	G2M
CCTCAACTCCATCTGC-1_1_1_1_1_1_1	NT1	3395	1436	3.68189	Singlet	0.129944	3	3	NT	T_cells	0.0869937	0.0244233	S
CCTCACAAGGTTAGTA-1_1_1_1_1_1_1	NT1	4769	679	0.0419375	Singlet	0.161017	24	24	NT	Others	-0.0185382	-0.0545628	G1
CCTCACACAAATTGCC-1_1_1_1_1_1_1	NT1	598	350	4.01338	Singlet	0.0254237	1	1	NT	Ductal_cells	0.0608335	-0.050165	S
CCTCACACATGAGATA-1_1_1_1_1_1_1	NT1	5660	1682	6.57244	Singlet	0.101695	9	9	NT	NK_cells	0.0563407	-0.0390488	S
CCTCACAGTCTTGTCC-1_1_1_1_1_1_1	NT1	616	340	1.62338	Singlet	0.039548	4	4	NT	Myeloid_cells	-0.0201127	-0.0197759	G1
CCTCAGTAGATGAACT-1_1_1_1_1_1_1	NT1	3268	1264	6.91554	Singlet	0.0112994	3	3	NT	T_cells	0.0487933	0.0351619	S
CCTCAGTAGCTGTACT-1_1_1_1_1_1_1	NT1	5143	1661	8.03033	Singlet	0.353107	6	6	NT	Myeloid_cells	0.0179737	-0.0221427	S
CCTCATGAGAAGAGCA-1_1_1_1_1_1_1	NT1	4861	1584	7.17959	Singlet	0.0649718	3	3	NT	T_cells	-0.0175898	-0.0357761	G1
CCTCATGAGCAACCAG-1_1_1_1_1_1_1	NT1	3829	1391	5.74563	Singlet	0.0225989	3	3	NT	T_cells	0.0137963	-0.0499224	S
CCTCATGGTTGCATGT-1_1_1_1_1_1_1	NT1	1320	715	2.04545	Singlet	0.059322	7	7	NT	Myeloid_cells	-0.0418258	-0.0846766	G1
CCTCCAATCACTGGGC-1_1_1_1_1_1_1	NT1	1594	587	4.07779	Singlet	0.0875706	4	4	NT	Myeloid_cells	-0.0208643	-0.0633018	G1
CCTCCTCAGCCTTTCC-1_1_1_1_1_1_1	NT1	6004	2212	5.44637	Singlet	0.285311	3	3	NT	T_cells	-0.00655238	0.0390609	G2M
CCTCCTCGTCTGTGAT-1_1_1_1_1_1_1	NT1	1068	489	0.842697	Singlet	0.00282486	2	2	NT	Myeloid_cells	-0.0238446	-0.0191946	G1
CCTCCTCTCGCAATGT-1_1_1_1_1_1_1	NT1	6063	1923	3.21623	Singlet	0.135593	0	0	NT	T_cells	0.0489272	-0.0325133	S
CCTCCTCTCGTGCTCT-1_1_1_1_1_1_1	NT1	3737	1455	5.59272	Singlet	0.0875706	3	3	NT	T_cells	0.0462218	-0.0635375	S
CCTCTAGAGCGAGAAA-1_1_1_1_1_1_1	NT1	1889	758	5.34674	Singlet	0.039548	17	17	NT	NK_cells	-0.0323389	-0.077689	G1
CCTCTAGAGCTAATCC-1_1_1_1_1_1_1	NT1	3184	1180	2.38693	Singlet	0.0141243	3	3	NT	T_cells	0.0569826	-0.00346677	S
CCTCTAGGTAAGATAC-1_1_1_1_1_1_1	NT1	866	469	17.4365	Singlet	0.0367232	2	2	NT	Myeloid_cells	-0.040522	-0.016648	G1
CCTCTAGGTCGCCACA-1_1_1_1_1_1_1	NT1	3338	1329	4.58358	Singlet	0.0282486	3	3	NT	T_cells	0.0211928	0.00647612	S
CCTCTCCCAAAGACGC-1_1_1_1_1_1_1	NT1	1849	854	1.73067	Singlet	0.0706215	2	2	NT	Myeloid_cells	0.00258365	-0.0149152	S
CCTCTCCCACATGACT-1_1_1_1_1_1_1	NT1	2220	949	2.16216	Singlet	0.0762712	7	7	NT	Myeloid_cells	-0.000784251	0.103819	G2M
CCTCTCCCACCACATA-1_1_1_1_1_1_1	NT1	3317	1392	7.44649	Singlet	0.0734463	3	3	NT	T_cells	-0.050542	-0.0451315	G1
CCTCTCCGTGTTAACC-1_1_1_1_1_1_1	NT1	3949	1298	13.3198	Singlet	0.248588	11	11	NT	Ductal_cells	-0.0493204	-0.0314965	G1
CCTCTCCGTTCGGACC-1_1_1_1_1_1_1	NT1	3755	1081	24.0479	Singlet	0.124294	15	15	NT	B_cells	-0.0166926	-0.0620288	G1
CCTGCATCAGAAATTG-1_1_1_1_1_1_1	NT1	4886	1515	6.56979	Singlet	0.0169492	3	3	NT	T_cells	0.00950243	-0.0845018	S
CCTGCATTCAGACCCG-1_1_1_1_1_1_1	NT1	3516	1352	3.52673	Singlet	0.0932203	9	9	NT	NK_cells	0.0579958	-0.0476643	S
CCTGCATTCGCCTATC-1_1_1_1_1_1_1	NT1	5691	1718	7.09893	Singlet	0.370056	6	6	NT	Myeloid_cells	0.0242901	0.00764	S
CCTGTTGCATTATGCG-1_1_1_1_1_1_1	NT1	3649	1353	6.93341	Singlet	0.0112994	3	3	NT	T_cells	0.0316925	-0.00153933	S
CCTGTTGGTTTCCCAC-1_1_1_1_1_1_1	NT1	4262	1520	5.32614	Singlet	0.0310734	3	3	NT	T_cells	0.0378871	-0.0820613	S
CCTTCAGAGAAGCGCT-1_1_1_1_1_1_1	NT1	5695	2353	19.6313	Singlet	0.384181	22	22	NT	Ductal_cells	-0.0236398	-0.0697125	G1
CCTTCAGAGGTGGGTT-1_1_1_1_1_1_1	NT1	1497	633	1.26921	Singlet	0.0282486	2	2	NT	Myeloid_cells	-0.0270497	0.013657	G2M
CCTTGTGCAGCAGATG-1_1_1_1_1_1_1	NT1	8149	2357	9.20358	Singlet	0.370056	14	14	NT	CAFs	-0.0327321	-0.0691151	G1
CCTTGTGGTGGCTTAT-1_1_1_1_1_1_1	NT1	615	408	2.11382	Singlet	0.0536723	4	4	NT	Myeloid_cells	0.0479506	-0.0079816	S
CCTTGTGGTGGGCTTC-1_1_1_1_1_1_1	NT1	3595	1433	4.81224	Singlet	0.059322	3	3	NT	T_cells	0.0646515	0.0421567	S
CCTTTGGCAACCGTGC-1_1_1_1_1_1_1	NT1	2043	1197	8.37004	Singlet	0.248588	20	20	NT	Ductal_cells	-0.0193017	-0.00399337	G1
CCTTTGGGTAACAGTA-1_1_1_1_1_1_1	NT1	3910	1516	5.08951	Singlet	0.0706215	8	8	NT	T_cells	-0.0120176	0.020091	G2M
CCTTTGGGTCGCAGTC-1_1_1_1_1_1_1	NT1	8532	2136	6.71589	Singlet	0.299435	5	5	NT	Myeloid_cells	-0.0583444	-0.0172354	G1
CCTTTGGGTCGCATGC-1_1_1_1_1_1_1	NT1	576	332	5.90278	Singlet	0.0423729	4	4	NT	Myeloid_cells	0.140132	-0.0581648	S
CCTTTGGTCGCTCATC-1_1_1_1_1_1_1	NT1	4086	1508	7.97846	Singlet	0.0988701	3	3	NT	T_cells	0.0431916	-0.0891125	S
CGAAGGAAGGCCGCTT-1_1_1_1_1_1_1	NT1	1596	787	2.63158	Singlet	0.0677966	7	7	NT	Myeloid_cells	-0.0339923	-0.00076302	G1
CGAAGTTCACACGTGC-1_1_1_1_1_1_1	NT1	4960	1674	10.9274	Singlet	0.0621469	3	3	NT	T_cells	0.0316176	-0.0117353	S
CGAAGTTCACTTGACA-1_1_1_1_1_1_1	NT1	3986	1418	6.77371	Singlet	0.0112994	3	3	NT	T_cells	0.0514966	-0.0483046	S
CGAAGTTTCCCGTAAA-1_1_1_1_1_1_1	NT1	36464	2109	4.18495	Singlet	0.274011	10	10	NT	NK_cells	-0.0134804	-0.0382372	G1
CGAATTGAGGAAGTCC-1_1_1_1_1_1_1	NT1	21539	897	0.116069	Singlet	0.259887	10	10	NT	NK_cells	-0.0172082	-0.0385272	G1
CGAATTGGTATGCGGA-1_1_1_1_1_1_1	NT1	740	457	3.37838	Singlet	0.00564972	7	7	NT	Myeloid_cells	-0.0321274	0.0899756	G2M
CGAATTGGTGATTGGG-1_1_1_1_1_1_1	NT1	1287	620	1.7094	Singlet	0.019774	2	2	NT	Myeloid_cells	0.0156508	-0.0821269	S
CGAATTGTCTGGTTGA-1_1_1_1_1_1_1	NT1	4296	1483	6.6108	Singlet	0.0367232	3	3	NT	T_cells	0.066844	0.00850587	S
CGACAGCCAGTTTCAG-1_1_1_1_1_1_1	NT1	16705	913	0.0119725	Singlet	0.268362	10	10	NT	NK_cells	-0.0189595	-0.0443154	G1
CGAGAAGAGGATGGCT-1_1_1_1_1_1_1	NT1	3889	1425	8.04834	Singlet	0.0282486	3	3	NT	T_cells	-0.00794445	0.0691065	G2M
CGAGAAGCACTGGCGT-1_1_1_1_1_1_1	NT1	1762	748	17.9909	Singlet	0.141243	1	1	NT	Ductal_cells	-0.0298529	-0.0418723	G1
CGAGAAGCAGGATCTT-1_1_1_1_1_1_1	NT1	2402	827	10.1582	Singlet	0.206215	6	6	NT	Myeloid_cells	-0.0375802	-0.0840153	G1
CGAGAAGGTAAGGTCG-1_1_1_1_1_1_1	NT1	836	448	2.27273	Singlet	0.00282486	2	2	NT	Myeloid_cells	-0.0312011	-0.0570001	G1
CGAGGAACACAAGCTT-1_1_1_1_1_1_1	NT1	1527	670	5.37001	Singlet	0.121469	4	4	NT	Myeloid_cells	-0.0278471	-0.0548196	G1
CGAGGAATCGCTGTCT-1_1_1_1_1_1_1	NT1	1070	417	0.0934579	Singlet	0.127119	18	18	NT	T_cells	-0.0201553	-0.0562871	G1
CGAGGCTAGAAGCCTG-1_1_1_1_1_1_1	NT1	3212	1290	8.21918	Singlet	0.0141243	3	3	NT	T_cells	-0.0141353	0.0479245	G2M
CGAGGCTTCGAGATAA-1_1_1_1_1_1_1	NT1	4939	1790	7.24843	Singlet	0.355932	6	6	NT	Myeloid_cells	-0.0386462	-0.0819708	G1
CGAGTGCCATTACGGT-1_1_1_1_1_1_1	NT1	1137	552	1.23131	Singlet	0.0112994	7	7	NT	Myeloid_cells	-0.0278977	-0.0403775	G1
CGAGTGCGTCCGATCG-1_1_1_1_1_1_1	NT1	1167	592	5.48415	Singlet	0.0960452	4	4	NT	Myeloid_cells	-0.0282255	-0.0209214	G1
CGAGTGCTCGAACACT-1_1_1_1_1_1_1	NT1	2719	1073	1.10335	Singlet	0.112994	7	7	NT	Myeloid_cells	-0.00855882	0.160647	G2M
CGAGTTAAGAACGTGC-1_1_1_1_1_1_1	NT1	21828	928	0.0137438	Singlet	0.265537	10	10	NT	NK_cells	-0.0185602	-0.0312603	G1
CGAGTTAAGTTGTCAC-1_1_1_1_1_1_1	NT1	5398	1729	10.8188	Singlet	0.350282	6	6	NT	Myeloid_cells	-0.00250475	-0.0310576	G1
CGAGTTACAACCGTAT-1_1_1_1_1_1_1	NT1	6474	2316	8.789	Singlet	0.378531	14	14	NT	CAFs	-0.0164056	-0.0715565	G1
CGAGTTAGTCTACAGT-1_1_1_1_1_1_1	NT1	9912	2466	3.11743	Singlet	0.378531	4	4	NT	Myeloid_cells	0.0079538	0.0202356	G2M
CGAGTTATCCGATGCG-1_1_1_1_1_1_1	NT1	3476	1322	6.24281	Singlet	0.183616	9	9	NT	NK_cells	-0.0479154	-0.00203614	G1
CGAGTTATCGTCTAAG-1_1_1_1_1_1_1	NT1	7969	2385	12.1345	Singlet	0.364407	14	14	NT	CAFs	-0.0309306	-0.104208	G1
CGATCGGAGGATAATC-1_1_1_1_1_1_1	NT1	1575	707	5.39683	Singlet	0.00847458	0	0	NT	T_cells	-0.0323365	-0.00319679	G1
CGATCGGAGTTGGAAT-1_1_1_1_1_1_1	NT1	5214	1699	5.75374	Singlet	0.141243	3	3	NT	T_cells	-0.0049931	-0.0305801	G1
CGATCGGCATACGCAT-1_1_1_1_1_1_1	NT1	2010	912	7.16418	Singlet	0.0112994	8	8	NT	T_cells	0.00979963	-0.0465104	S
CGATCGGGTGGTAACG-1_1_1_1_1_1_1	NT1	633	423	4.2654	Singlet	0.0536723	14	14	NT	CAFs	0.0292027	-0.0201517	S
CGATGCGGTTATGGTC-1_1_1_1_1_1_1	NT1	6189	1578	5.62288	Singlet	0.200565	5	5	NT	Myeloid_cells	-0.0515456	-0.00841399	G1
CGATGCGTCGGACAAG-1_1_1_1_1_1_1	NT1	3083	1157	10.866	Singlet	0.0141243	3	3	NT	T_cells	0.0329261	0.0136234	S
CGATGGCCACCCTGAG-1_1_1_1_1_1_1	NT1	1198	439	12.2705	Singlet	0.059322	6	6	NT	Myeloid_cells	-0.0199111	-0.01885	G1
CGATGGCGTCCTGGTG-1_1_1_1_1_1_1	NT1	7976	528	0.238215	Singlet	0.259887	10	10	NT	NK_cells	-0.0162252	-0.0364553	G1
CGATGGCTCTGGCCGA-1_1_1_1_1_1_1	NT1	523	368	5.92734	Singlet	0.0451977	0	0	NT	T_cells	-0.0337026	-0.00422928	G1
CGCAGGTGTCTACAGT-1_1_1_1_1_1_1	NT1	639	400	6.57277	Singlet	0.0734463	4	4	NT	Myeloid_cells	-0.0212022	-0.013192	G1
CGCAGGTTCTCACCCA-1_1_1_1_1_1_1	NT1	727	397	0.687758	Singlet	0.0621469	4	4	NT	Myeloid_cells	-0.0116088	-0.069782	G1
CGCATAACAAGCGGAT-1_1_1_1_1_1_1	NT1	5038	383	0.0396983	Singlet	0.257062	10	10	NT	NK_cells	-0.0140115	-0.0319168	G1
CGCATAACACAGTATC-1_1_1_1_1_1_1	NT1	3533	1354	5.29295	Singlet	0.0254237	8	8	NT	T_cells	0.0221316	0.0198211	S
CGCATAAGTGGAACAC-1_1_1_1_1_1_1	NT1	4366	1583	4.87861	Singlet	0.079096	3	3	NT	T_cells	0.0346562	0.0196616	S
CGCATAATCGACCAAT-1_1_1_1_1_1_1	NT1	1269	662	4.25532	Singlet	0.118644	4	4	NT	Myeloid_cells	0.0155954	-0.0490747	S
CGCATGGGTACAAACA-1_1_1_1_1_1_1	NT1	1067	370	27.6476	Singlet	0.0677966	6	6	NT	Myeloid_cells	-0.0252942	-0.0508317	G1
CGCCAGACAATAGTCC-1_1_1_1_1_1_1	NT1	3347	1264	9.08276	Singlet	0.0225989	3	3	NT	T_cells	-0.0186225	0.0648432	G2M
CGCCATTCACGTAGAG-1_1_1_1_1_1_1	NT1	5686	2045	11.414	Singlet	0.367232	14	14	NT	CAFs	-0.0407359	-0.014179	G1
CGCCATTTCTCACGAA-1_1_1_1_1_1_1	NT1	4449	1713	8.47381	Singlet	0.186441	3	3	NT	T_cells	0.0148246	-0.0746322	S
CGCGTGATCCGACATA-1_1_1_1_1_1_1	NT1	1221	542	0.4095	Singlet	0.00564972	2	2	NT	Myeloid_cells	-0.03109	-0.029941	G1
CGGAACCAGTGCGTCC-1_1_1_1_1_1_1	NT1	2603	1045	5.83942	Singlet	0.0451977	17	17	NT	NK_cells	-0.0441736	-0.0817776	G1
CGGAACCCAGCGTGAA-1_1_1_1_1_1_1	NT1	3445	1243	2.72859	Singlet	0.0423729	3	3	NT	T_cells	0.0277775	-0.0842344	S
CGGAACCGTAGTTACC-1_1_1_1_1_1_1	NT1	3687	1417	6.02116	Singlet	0.0451977	3	3	NT	T_cells	-0.0159888	-0.069453	G1
CGGAACCTCCACCTGT-1_1_1_1_1_1_1	NT1	5375	1457	4.35349	Singlet	0.0225989	12	12	NT	T_cells	0.11124	-0.0657659	S
CGGAATTGTTGTGGCC-1_1_1_1_1_1_1	NT1	3853	1323	5.21671	Singlet	0.0169492	3	3	NT	T_cells	0.0165381	-0.0128343	S
CGGACACCAGTTCTAG-1_1_1_1_1_1_1	NT1	4036	1435	6.93756	Singlet	0.0338983	3	3	NT	T_cells	0.0698543	-0.0102083	S
CGGACACTCCTAGCTC-1_1_1_1_1_1_1	NT1	4227	1691	6.93163	Singlet	0.344633	24	24	NT	Others	-0.0122622	-0.0228745	G1
CGGAGAAAGCATTGTC-1_1_1_1_1_1_1	NT1	1855	814	1.83288	Singlet	0.0734463	7	7	NT	Myeloid_cells	-0.0217144	-0.0720737	G1
CGGAGAACACTATGTG-1_1_1_1_1_1_1	NT1	5941	1778	10.1498	Singlet	0.355932	6	6	NT	Myeloid_cells	-0.0390183	0.00881035	G2M
CGGCAGTAGGTTAAAC-1_1_1_1_1_1_1	NT1	3597	1354	8.17348	Singlet	0.0254237	3	3	NT	T_cells	-0.0537711	-0.0383541	G1
CGGCAGTCAACATCGT-1_1_1_1_1_1_1	NT1	520	356	5.76923	Singlet	0.0451977	5	5	NT	Myeloid_cells	-0.027793	-0.00477871	G1
CGGCAGTGTTGGGCCT-1_1_1_1_1_1_1	NT1	867	494	9.34256	Singlet	0.0932203	4	4	NT	Myeloid_cells	0.0428964	-0.0693092	S
CGGGACTCAGAACTAA-1_1_1_1_1_1_1	NT1	1524	651	16.0105	Singlet	0.0875706	4	4	NT	Myeloid_cells	-0.0182211	0.00744076	G2M
CGGGCATCACCCTGAG-1_1_1_1_1_1_1	NT1	5014	1715	13.3825	Singlet	0.234463	9	9	NT	NK_cells	-0.03425	0.00792727	G2M
CGGGCATTCAGAGCGA-1_1_1_1_1_1_1	NT1	2968	1122	6.73854	Singlet	0.00564972	3	3	NT	T_cells	0.0346841	-0.0232493	S
CGGGCATTCGGTATGT-1_1_1_1_1_1_1	NT1	4449	1585	8.74354	Singlet	0.353107	6	6	NT	Myeloid_cells	-0.00470527	-0.00838341	G1
CGGGTCAAGTATGAGT-1_1_1_1_1_1_1	NT1	899	440	5.4505	Singlet	0.0508475	4	4	NT	Myeloid_cells	0.0439302	-0.00662462	S
CGGGTCACAACCCTCT-1_1_1_1_1_1_1	NT1	7275	489	0.19244	Singlet	0.262712	10	10	NT	NK_cells	-0.0153379	-0.034864	G1
CGGGTGTAGACCAAGC-1_1_1_1_1_1_1	NT1	14624	760	0.0205142	Singlet	0.265537	10	10	NT	NK_cells	-0.000883582	-0.0356132	G1
CGGGTGTCACACAGAG-1_1_1_1_1_1_1	NT1	13933	2413	7.62219	Singlet	0.288136	4	4	NT	Myeloid_cells	-0.0354618	-0.0487582	G1
CGGGTGTTCATTATCC-1_1_1_1_1_1_1	NT1	2514	938	10.0636	Singlet	0.161017	11	11	NT	Ductal_cells	-0.00013254	0.0384947	G2M
CGGGTGTTCGGATTAC-1_1_1_1_1_1_1	NT1	7893	2498	11.6306	Singlet	0.381356	14	14	NT	CAFs	-0.0864805	-0.122254	G1
CGGTCAGCAGAGACTG-1_1_1_1_1_1_1	NT1	3594	1257	5.78742	Singlet	0.00564972	3	3	NT	T_cells	0.0180585	0.00451991	S
CGTAAGTCAAGTATCC-1_1_1_1_1_1_1	NT1	4317	1764	9.47417	Singlet	0.30226	14	14	NT	CAFs	-0.0849103	-0.0285019	G1
CGTAAGTGTGTCCACG-1_1_1_1_1_1_1	NT1	663	432	0.301659	Singlet	0.138418	22	22	NT	Ductal_cells	-0.0312146	-0.0258752	G1
CGTAATGAGCCTGAAG-1_1_1_1_1_1_1	NT1	5464	2118	7.72328	Singlet	0.381356	14	14	NT	CAFs	-0.0346731	-0.0816829	G1
CGTAATGCAGGAACCA-1_1_1_1_1_1_1	NT1	830	366	6.26506	Singlet	0.00564972	2	2	NT	Myeloid_cells	-0.0237398	-0.0389459	G1
CGTAATGGTGCTTATG-1_1_1_1_1_1_1	NT1	3247	1287	7.9458	Singlet	0.0225989	8	8	NT	T_cells	0.0567658	0.0716104	G2M
CGTAGTATCGACGTCG-1_1_1_1_1_1_1	NT1	956	498	7.84519	Singlet	0.101695	4	4	NT	Myeloid_cells	-0.0225405	-0.0220958	G1
CGTCAAAAGCAAGTCG-1_1_1_1_1_1_1	NT1	3700	1299	6.75676	Singlet	0.0112994	3	3	NT	T_cells	0.0257247	0.0470174	G2M
CGTCAAAGTGAGATTA-1_1_1_1_1_1_1	NT1	4178	1484	8.87985	Singlet	0.350282	6	6	NT	Myeloid_cells	-0.0266178	-0.0702385	G1
CGTCCATAGGGCCCTT-1_1_1_1_1_1_1	NT1	833	483	6.0024	Singlet	0	2	2	NT	Myeloid_cells	-0.0209508	0.0128362	G2M
CGTCCATGTGCCTTCT-1_1_1_1_1_1_1	NT1	3848	1491	5.53534	Singlet	0.0875706	3	3	NT	T_cells	-0.0643198	0.059084	G2M
CGTGAATCAGCAGTTT-1_1_1_1_1_1_1	NT1	937	496	2.77481	Singlet	0.0112994	2	2	NT	Myeloid_cells	-0.0246241	-0.0583784	G1
CGTGAATCATGAGTAA-1_1_1_1_1_1_1	NT1	3789	1339	2.95593	Singlet	0.0225989	8	8	NT	T_cells	-0.015089	-0.0202954	G1
CGTGAATCATTCGATG-1_1_1_1_1_1_1	NT1	6700	2155	5.71642	Singlet	0.251412	3	3	NT	T_cells	0.00898842	-0.0269119	S
CGTGAATTCCCAGGCA-1_1_1_1_1_1_1	NT1	3359	1221	6.28163	Singlet	0.00282486	3	3	NT	T_cells	-0.0127967	-0.0446663	G1
CGTGATAAGAAGGTAG-1_1_1_1_1_1_1	NT1	505	312	12.4752	Singlet	0.0310734	14	14	NT	CAFs	-0.0347293	-0.0472254	G1
CGTGATAAGCCAAGTG-1_1_1_1_1_1_1	NT1	9494	615	0.0210659	Singlet	0.265537	10	10	NT	NK_cells	-0.0137697	-0.0347619	G1
CGTGATAAGTAATTGG-1_1_1_1_1_1_1	NT1	660	331	3.48485	Singlet	0.0367232	2	2	NT	Myeloid_cells	-0.0213848	0.0999574	G2M
CGTGATAGTCCCGGTA-1_1_1_1_1_1_1	NT1	802	362	7.10723	Singlet	0.0621469	4	4	NT	Myeloid_cells	-0.0274152	-0.0574689	G1
CGTGCTTAGCTGACCC-1_1_1_1_1_1_1	NT1	979	514	3.37079	Singlet	0.00847458	7	7	NT	Myeloid_cells	-0.0352931	-0.0243841	G1
CGTGCTTTCGGCATCG-1_1_1_1_1_1_1	NT1	2565	824	1.09162	Singlet	0.169492	24	24	NT	Others	0.011003	-0.0583337	S
CGTGTCTAGCTAGTTC-1_1_1_1_1_1_1	NT1	7674	2261	3.76596	Singlet	0.387006	4	4	NT	Myeloid_cells	-0.0451908	-0.0849879	G1
CGTTAGACAACTCGTA-1_1_1_1_1_1_1	NT1	5023	1618	4.28031	Singlet	0.129944	9	9	NT	NK_cells	-0.0189413	-0.0703752	G1
CGTTAGAGTACCTAAC-1_1_1_1_1_1_1	NT1	9317	1431	9.11238	Singlet	0.155367	24	24	NT	Others	-0.0349112	-0.0586463	G1
CGTTCTGAGGAAGAAC-1_1_1_1_1_1_1	NT1	1881	804	14.992	Singlet	0.242938	11	11	NT	Ductal_cells	0.00233348	-0.045285	S
CGTTCTGAGTGCCAGA-1_1_1_1_1_1_1	NT1	921	557	6.40608	Singlet	0.0169492	2	2	NT	Myeloid_cells	0.0253369	0.094336	G2M
CGTTCTGCAACTGATC-1_1_1_1_1_1_1	NT1	3594	1416	5.17529	Singlet	0.214689	9	9	NT	NK_cells	0.0588449	-0.0395547	S
CGTTCTGGTATGTCAC-1_1_1_1_1_1_1	NT1	6027	1907	7.13456	Singlet	0.367232	6	6	NT	Myeloid_cells	-0.0185428	-0.0870752	G1
CGTTGGGTCATTTGTC-1_1_1_1_1_1_1	NT1	597	367	2.68007	Singlet	0.0508475	1	1	NT	Ductal_cells	-0.01636	-0.0560565	G1
CTAACTTTCGGCAGTC-1_1_1_1_1_1_1	NT1	4221	1220	6.25444	Singlet	0.189266	13	13	NT	B_cells	0.0469839	-0.0255792	S
CTAACTTTCGTGTGGC-1_1_1_1_1_1_1	NT1	1827	880	1.4231	Singlet	0.0932203	7	7	NT	Myeloid_cells	-0.00282348	0.121048	G2M
CTAAGTGAGGAAAGTG-1_1_1_1_1_1_1	NT1	6351	2106	3.54275	Singlet	0.370056	6	6	NT	Myeloid_cells	0.0194395	-0.0981826	S
CTAAGTGCAACGAGGT-1_1_1_1_1_1_1	NT1	19729	340	0.212885	Singlet	0.0621469	19	19	NT	Myeloid_cells	-0.00438848	0.00307571	G2M
CTAAGTGCAATAAGGT-1_1_1_1_1_1_1	NT1	2415	965	6.50104	Singlet	0.10452	9	9	NT	NK_cells	-0.0407004	-0.0306794	G1
CTAAGTGCATAAGATG-1_1_1_1_1_1_1	NT1	5967	1355	4.08916	Singlet	0.039548	0	0	NT	T_cells	0.0125413	-0.0452317	S
CTAAGTGCATCAGCGC-1_1_1_1_1_1_1	NT1	27776	1183	0.421227	Singlet	0.265537	10	10	NT	NK_cells	-0.00887556	-0.034893	G1
CTAAGTGTCCAACCGG-1_1_1_1_1_1_1	NT1	4948	1627	6.36621	Singlet	0.0734463	3	3	NT	T_cells	0.0778742	-0.02052	S
CTACAGAAGAGGGTGG-1_1_1_1_1_1_1	NT1	3723	1219	4.83481	Singlet	0.00847458	3	3	NT	T_cells	-0.00181991	-0.0721557	G1
CTACAGAAGGGCAAGG-1_1_1_1_1_1_1	NT1	4085	1465	6.73195	Singlet	0.039548	3	3	NT	T_cells	-0.062676	-0.00443489	G1
CTACAGAAGGTCTACT-1_1_1_1_1_1_1	NT1	4755	1640	6.77182	Singlet	0.0734463	3	3	NT	T_cells	-0.0339192	-0.02285	G1
CTACAGATCTGTGCGG-1_1_1_1_1_1_1	NT1	5911	1883	15.9871	Singlet	0.327684	14	14	NT	CAFs	0.00892876	-0.0984304	S
CTACATTGTATCGTTG-1_1_1_1_1_1_1	NT1	4439	1596	2.81595	Singlet	0.0847458	0	0	NT	T_cells	0.03109	0.030614	S
CTACATTTCCTGCTAC-1_1_1_1_1_1_1	NT1	6036	1977	8.84692	Singlet	0.367232	6	6	NT	Myeloid_cells	-0.0384113	0.0215865	G2M
CTACATTTCGTTGTTT-1_1_1_1_1_1_1	NT1	1728	603	6.13426	Singlet	0.0423729	4	4	NT	Myeloid_cells	-0.0261271	-0.0710331	G1
CTACCCAAGTCCTGTA-1_1_1_1_1_1_1	NT1	592	363	3.88514	Singlet	0.0706215	4	4	NT	Myeloid_cells	-0.0181813	-0.00212883	G1
CTACCCACAGCGTTTA-1_1_1_1_1_1_1	NT1	1167	579	5.22708	Singlet	0.0225989	8	8	NT	T_cells	0.0310208	0.0253887	S
CTACCCAGTGACCGTC-1_1_1_1_1_1_1	NT1	691	419	3.61795	Singlet	0.0112994	2	2	NT	Myeloid_cells	-0.0169307	-0.0676554	G1
CTACCTGCAAAGAACT-1_1_1_1_1_1_1	NT1	6466	2123	6.61924	Singlet	0.364407	14	14	NT	CAFs	0.0203805	-0.0556502	S
CTACCTGCAATCGCGC-1_1_1_1_1_1_1	NT1	11935	603	0.0418936	Singlet	0.259887	10	10	NT	NK_cells	-0.010574	-0.032954	G1
CTACCTGTCTTAGTTC-1_1_1_1_1_1_1	NT1	5388	1869	5.17817	Singlet	0.189266	3	3	NT	T_cells	0.0150373	-0.0549923	S
CTACGGGAGTGCGCTC-1_1_1_1_1_1_1	NT1	3785	1391	4.91413	Singlet	0.115819	9	9	NT	NK_cells	-0.0148531	0.0387821	G2M
CTACGGGAGTTGTAAG-1_1_1_1_1_1_1	NT1	802	445	2.86783	Singlet	0.0536723	1	1	NT	Ductal_cells	-0.0240331	0.041068	G2M
CTACGGGCATTGACTG-1_1_1_1_1_1_1	NT1	2625	1315	6.17143	Singlet	0.20904	3	3	NT	T_cells	0.0667288	-0.00244869	S
CTACTATCAAGAGGCT-1_1_1_1_1_1_1	NT1	4357	1580	4.72802	Singlet	0.115819	3	3	NT	T_cells	0.0339633	-0.0521954	S
CTAGACAAGGACATCG-1_1_1_1_1_1_1	NT1	1289	635	3.25834	Singlet	0.0536723	7	7	NT	Myeloid_cells	-0.0342797	0.0383953	G2M
CTAGACAAGTCCGTCG-1_1_1_1_1_1_1	NT1	5395	1658	6.26506	Singlet	0.0367232	3	3	NT	T_cells	-0.0504979	-0.0114855	G1
CTAGACAAGTTGGAAT-1_1_1_1_1_1_1	NT1	8886	492	0.0450146	Singlet	0.257062	10	10	NT	NK_cells	-0.014411	-0.032746	G1
CTAGACACACACCGAC-1_1_1_1_1_1_1	NT1	6478	1909	9.24668	Singlet	0.361582	6	6	NT	Myeloid_cells	0.0501082	-0.0315538	S
CTAGACACAGCACAAG-1_1_1_1_1_1_1	NT1	974	552	1.3347	Singlet	0.0254237	2	2	NT	Myeloid_cells	-0.032375	-0.0710827	G1
CTAGGTAGTAGACTGG-1_1_1_1_1_1_1	NT1	595	407	4.70588	Singlet	0.0508475	1	1	NT	Ductal_cells	-0.0248392	0.00742183	G2M
CTATAGGCAGAACATA-1_1_1_1_1_1_1	NT1	5297	1799	4.83292	Singlet	0.358757	6	6	NT	Myeloid_cells	-0.0160648	-0.0217699	G1
CTATAGGTCCAACTAG-1_1_1_1_1_1_1	NT1	3847	1499	4.39303	Singlet	0.0932203	8	8	NT	T_cells	-0.0279325	0.109038	G2M
CTATAGGTCCCGATCT-1_1_1_1_1_1_1	NT1	6511	1468	2.84135	Singlet	0.0310734	0	0	NT	T_cells	0.0288448	-0.0152928	S
CTATCCGAGGCCTGCT-1_1_1_1_1_1_1	NT1	1619	782	3.02656	Singlet	0.0706215	7	7	NT	Myeloid_cells	-0.0346328	0.126425	G2M
CTATCCGCACATGACT-1_1_1_1_1_1_1	NT1	961	634	4.47451	Singlet	0.0536723	0	0	NT	T_cells	0.0214597	-0.0145499	S
CTATCCGTCATGCCCT-1_1_1_1_1_1_1	NT1	7097	2020	6.42525	Singlet	0.372881	6	6	NT	Myeloid_cells	0.00906294	0.00500806	S
CTATCTACAGAACTTC-1_1_1_1_1_1_1	NT1	674	371	2.81899	Singlet	0.00282486	2	2	NT	Myeloid_cells	-0.0106193	0.0453673	G2M
CTATCTACATTCACCC-1_1_1_1_1_1_1	NT1	2926	1195	2.87081	Singlet	0.228814	4	4	NT	Myeloid_cells	0.0299678	-0.00816196	S
CTATCTATCTCCTGTG-1_1_1_1_1_1_1	NT1	1085	524	3.5023	Singlet	0.107345	4	4	NT	Myeloid_cells	-0.0292896	-0.0289453	G1
CTCAACCTCGGTTAGT-1_1_1_1_1_1_1	NT1	3276	1208	4.54823	Singlet	0.0112994	3	3	NT	T_cells	-0.00248667	-0.0416653	G1
CTCAAGAAGTAATTGG-1_1_1_1_1_1_1	NT1	659	429	6.37329	Singlet	0.0819209	4	4	NT	Myeloid_cells	-0.0376553	-0.0488743	G1
CTCAAGACAATTGCTG-1_1_1_1_1_1_1	NT1	1111	622	9.63096	Singlet	0.144068	20	20	NT	Ductal_cells	-0.048245	-0.0414587	G1
CTCAAGATCCCAAGTA-1_1_1_1_1_1_1	NT1	6451	2309	15.5015	Singlet	0.327684	22	22	NT	Ductal_cells	-0.0479408	-0.0284236	G1
CTCAATTAGCACAAAT-1_1_1_1_1_1_1	NT1	4431	1492	3.52065	Singlet	0.0903955	9	9	NT	NK_cells	-0.06028	-0.0404605	G1
CTCAATTAGCTTGTTG-1_1_1_1_1_1_1	NT1	4041	1510	5.22148	Singlet	0.0649718	3	3	NT	T_cells	0.0581614	0.0197852	S
CTCAATTAGGTAGACC-1_1_1_1_1_1_1	NT1	597	365	6.03015	Singlet	0.0508475	4	4	NT	Myeloid_cells	-0.0194951	-0.0517585	G1
CTCAATTTCACGAACT-1_1_1_1_1_1_1	NT1	3863	1428	5.85038	Singlet	0.0423729	3	3	NT	T_cells	0.00427061	-0.0221868	S
CTCACTGTCAGCTGTA-1_1_1_1_1_1_1	NT1	5079	1724	4.15436	Singlet	0.358757	6	6	NT	Myeloid_cells	-0.0341781	-0.051961	G1
CTCAGAAGTATTGACC-1_1_1_1_1_1_1	NT1	2064	617	8.57558	Singlet	0.0480226	19	19	NT	Myeloid_cells	-0.0256765	-0.0384387	G1
CTCAGAAGTTCTTGCC-1_1_1_1_1_1_1	NT1	1637	674	3.3598	Singlet	0.124294	4	4	NT	Myeloid_cells	0.0159987	-0.0531817	S
CTCAGAAGTTTCTATC-1_1_1_1_1_1_1	NT1	5480	1897	5.69343	Singlet	0.367232	6	6	NT	Myeloid_cells	0.0352377	-0.0193511	S
CTCAGAATCCTTGAAG-1_1_1_1_1_1_1	NT1	4070	1460	2.97297	Singlet	0.0423729	8	8	NT	T_cells	0.0996835	0.0168507	S
CTCAGGGTCGCGTGCA-1_1_1_1_1_1_1	NT1	7313	1873	14.2212	Singlet	0.375706	6	6	NT	Myeloid_cells	-0.0604334	-0.0970038	G1
CTCAGGGTCGGTTGTA-1_1_1_1_1_1_1	NT1	4461	1608	4.97646	Singlet	0.132768	8	8	NT	T_cells	0.150871	0.0627156	S
CTCAGTCAGTGTAGTA-1_1_1_1_1_1_1	NT1	1117	712	5.99821	Singlet	0.169492	20	20	NT	Ductal_cells	-0.0378643	-0.0868721	G1
CTCAGTCGTGCATGAG-1_1_1_1_1_1_1	NT1	20994	1299	0.00952653	Singlet	0.279661	10	10	NT	NK_cells	-0.00636936	-0.0458401	G1
CTCAGTCTCAAACGTC-1_1_1_1_1_1_1	NT1	2122	1180	0.518379	Singlet	0.30791	22	22	NT	Ductal_cells	0.0498245	-0.0139877	S
CTCAGTCTCACGGGCT-1_1_1_1_1_1_1	NT1	4929	1629	5.94441	Singlet	0.0536723	3	3	NT	T_cells	0.0529388	0.0861378	G2M
CTCAGTCTCTTAGGAC-1_1_1_1_1_1_1	NT1	4156	1555	4.93263	Singlet	0.132768	3	3	NT	T_cells	-0.0267443	-0.032582	G1
CTCATCGAGCCTGACC-1_1_1_1_1_1_1	NT1	4745	1673	4.48894	Singlet	0.144068	3	3	NT	T_cells	0.00601446	0.0441434	G2M
CTCATCGAGTGATCGG-1_1_1_1_1_1_1	NT1	2522	1064	4.08406	Singlet	0.282486	2	2	NT	Myeloid_cells	-0.045825	-0.0644978	G1
CTCATCGCACAGAGCA-1_1_1_1_1_1_1	NT1	1285	589	4.4358	Singlet	0.019774	2	2	NT	Myeloid_cells	-0.0184224	0.0801728	G2M
CTCATCGCAGTGACCC-1_1_1_1_1_1_1	NT1	509	301	3.73281	Singlet	0.0423729	5	5	NT	Myeloid_cells	-0.0167886	-0.0505679	G1
CTCATCGTCATTTGCT-1_1_1_1_1_1_1	NT1	3673	1411	6.28914	Singlet	0.039548	3	3	NT	T_cells	0.00884236	-0.00647572	S
CTCATCGTCGGCGATC-1_1_1_1_1_1_1	NT1	618	345	5.98706	Singlet	0.0423729	4	4	NT	Myeloid_cells	-0.0192742	-0.0573592	G1
CTCATGCTCTTACTGT-1_1_1_1_1_1_1	NT1	963	487	1.76532	Singlet	0.00282486	2	2	NT	Myeloid_cells	-0.0270738	0.033727	G2M
CTCATTACATAACGGG-1_1_1_1_1_1_1	NT1	3630	1322	5.48209	Singlet	0.00847458	8	8	NT	T_cells	0.0457986	-0.0373562	S
CTCATTAGTATGGTAA-1_1_1_1_1_1_1	NT1	1571	787	1.40038	Singlet	0.0734463	7	7	NT	Myeloid_cells	-0.0392908	0.0573557	G2M
CTCCAACAGATGGTAT-1_1_1_1_1_1_1	NT1	2871	1138	5.92128	Singlet	0.00847458	3	3	NT	T_cells	0.0669108	0.025477	S
CTCCAACGTCGCCACA-1_1_1_1_1_1_1	NT1	581	383	4.64716	Singlet	0.0367232	1	1	NT	Ductal_cells	-0.0361717	-0.0661926	G1
CTCCACACAACTGAAA-1_1_1_1_1_1_1	NT1	4847	1932	3.52796	Singlet	0.30791	9	9	NT	NK_cells	0.0387076	-0.123316	S
CTCCACACATCCTATT-1_1_1_1_1_1_1	NT1	4280	1521	6.7757	Singlet	0.10452	3	3	NT	T_cells	-0.020351	-0.00719958	G1
CTCCACAGTGAGATCG-1_1_1_1_1_1_1	NT1	4108	1487	3.1889	Singlet	0.138418	9	9	NT	NK_cells	-0.0278206	-0.0100651	G1
CTCCACAGTGAGGCAT-1_1_1_1_1_1_1	NT1	2433	865	13.9334	Singlet	0.161017	11	11	NT	Ductal_cells	0.00407803	-0.027584	S
CTCCATGAGTTGTAAG-1_1_1_1_1_1_1	NT1	2752	1460	9.88372	Singlet	0.319209	14	14	NT	CAFs	0.0801546	-0.0296509	S
CTCCCAAAGGATTCCT-1_1_1_1_1_1_1	NT1	3446	1356	6.9646	Singlet	0.0536723	3	3	NT	T_cells	-0.0277381	-0.0499017	G1
CTCCCAACAGTAACGG-1_1_1_1_1_1_1	NT1	540	341	19.4444	Singlet	0.0819209	18	18	NT	T_cells	-0.0480115	-0.0555085	G1
CTCCCAAGTCCTCAGG-1_1_1_1_1_1_1	NT1	4736	1855	4.51858	Singlet	0.361582	21	21	NT	Others	-0.0458105	-0.0264691	G1
CTCCCAATCTTTCCAA-1_1_1_1_1_1_1	NT1	837	515	4.6595	Singlet	0.0734463	14	14	NT	CAFs	-0.0339411	-0.0693589	G1
CTCCCTCAGGGCCCTT-1_1_1_1_1_1_1	NT1	1055	509	4.17062	Singlet	0.0932203	4	4	NT	Myeloid_cells	-0.0250961	-0.0673389	G1
CTCCCTCGTGCATGTT-1_1_1_1_1_1_1	NT1	30728	1961	4.26972	Singlet	0.279661	10	10	NT	NK_cells	-0.00912021	-0.0567826	G1
CTCCCTCGTTCCAGGC-1_1_1_1_1_1_1	NT1	1527	746	8.05501	Singlet	0.20339	11	11	NT	Ductal_cells	-0.0431458	0.00289772	G2M
CTCCGATGTATCGCAT-1_1_1_1_1_1_1	NT1	1837	783	6.0969	Singlet	0.0112994	8	8	NT	T_cells	-0.0394071	-3.76496e-05	G1
CTCCGATGTTCTTGTT-1_1_1_1_1_1_1	NT1	3914	1829	1.27747	Singlet	0.344633	21	21	NT	Others	-0.022389	-0.0703564	G1
CTCCTCCAGTTGTCAC-1_1_1_1_1_1_1	NT1	3725	1487	6.01342	Singlet	0.110169	3	3	NT	T_cells	0.0654856	0.0908228	G2M
CTCCTCCTCAAGTTGC-1_1_1_1_1_1_1	NT1	819	484	4.6398	Singlet	0.0564972	1	1	NT	Ductal_cells	-0.0362069	-0.0607757	G1
CTCCTCCTCGCGCTGA-1_1_1_1_1_1_1	NT1	5039	1566	20.5199	Singlet	0.0225989	3	3	NT	T_cells	0.0534376	0.0175575	S
CTCCTCCTCTAGACCA-1_1_1_1_1_1_1	NT1	2130	992	5.77465	Singlet	0.158192	2	2	NT	Myeloid_cells	-0.0491157	-0.0749032	G1
CTCCTTTGTTGCGTAT-1_1_1_1_1_1_1	NT1	4436	1605	4.01262	Singlet	0.118644	3	3	NT	T_cells	0.101585	-0.00808128	S
CTCGAGGCAGACCAAG-1_1_1_1_1_1_1	NT1	13079	707	1.04748	Singlet	0.265537	10	10	NT	NK_cells	-0.0166351	-0.0376277	G1
CTCGAGGTCCAGTGCG-1_1_1_1_1_1_1	NT1	3482	1379	22.5445	Singlet	0.293785	14	14	NT	CAFs	-0.062045	-0.0858958	G1
CTCTCAGAGCTAGTTC-1_1_1_1_1_1_1	NT1	1127	529	6.12245	Singlet	0.0932203	4	4	NT	Myeloid_cells	-0.0300514	-0.0257806	G1
CTCTCAGAGTGGACGT-1_1_1_1_1_1_1	NT1	4416	1498	5.32156	Singlet	0.144068	0	0	NT	T_cells	0.00119201	-0.0537503	S
CTCTCAGCATACCAGT-1_1_1_1_1_1_1	NT1	3295	1344	7.19272	Singlet	0.019774	8	8	NT	T_cells	0.0273319	-0.0534751	S
CTCTCAGTCCACGGGT-1_1_1_1_1_1_1	NT1	1714	834	11.4936	Singlet	0.019774	3	3	NT	T_cells	0.0444601	-0.0204972	S
CTCTCGAAGAGAGCCT-1_1_1_1_1_1_1	NT1	2064	791	2.08333	Singlet	0.0141243	18	18	NT	T_cells	0.015597	0.0102458	S
CTCTCGAAGCAGGGAG-1_1_1_1_1_1_1	NT1	3340	1227	9.34132	Singlet	0.0112994	3	3	NT	T_cells	-0.0112216	-0.0301599	G1
CTCTCGAGTCTGTGGC-1_1_1_1_1_1_1	NT1	4346	1684	4.87805	Singlet	0.259887	9	9	NT	NK_cells	0.00399766	0.0410348	G2M
CTCTCGATCAAGCCGC-1_1_1_1_1_1_1	NT1	5097	1689	7.0826	Singlet	0.0903955	3	3	NT	T_cells	-0.0301994	0.0482223	G2M
CTCTGGTCACATGAAA-1_1_1_1_1_1_1	NT1	526	304	0.380228	Singlet	0.059322	4	4	NT	Myeloid_cells	0.0545999	0.0111314	S
CTCTGGTTCCACGGAC-1_1_1_1_1_1_1	NT1	3684	1294	2.443	Singlet	0.0423729	9	9	NT	NK_cells	0.0230249	-0.0330819	S
CTCTGGTTCTACCACC-1_1_1_1_1_1_1	NT1	506	343	9.09091	Singlet	0.0367232	18	18	NT	T_cells	0.151558	0.107417	S
CTGAGGCCACGAAAGC-1_1_1_1_1_1_1	NT1	4202	1420	3.09376	Singlet	0.019774	8	8	NT	T_cells	0.0450018	0.0361114	S
CTGAGGCGTGAACTAA-1_1_1_1_1_1_1	NT1	9263	741	0.291482	Singlet	0.271186	10	10	NT	NK_cells	-0.000755826	-0.0276102	G1
CTGAGGCGTGTGGACA-1_1_1_1_1_1_1	NT1	3427	1290	8.92909	Singlet	0.0338983	3	3	NT	T_cells	0.0572308	-0.048942	S
CTGATCCAGGCGTTAG-1_1_1_1_1_1_1	NT1	586	312	13.1399	Singlet	0.0310734	1	1	NT	Ductal_cells	-0.0235901	-0.0535263	G1
CTGATCCAGTCAAGCG-1_1_1_1_1_1_1	NT1	1379	452	11.5301	Singlet	0.0564972	6	6	NT	Myeloid_cells	-0.020805	-0.0631465	G1
CTGATCCCAGGTGTGA-1_1_1_1_1_1_1	NT1	3720	1357	2.63441	Singlet	0.039548	0	0	NT	T_cells	0.0186583	-0.0328105	S
CTGATCCGTTCTCTAT-1_1_1_1_1_1_1	NT1	4099	1417	6.70895	Singlet	0.0282486	3	3	NT	T_cells	0.0421311	0.00691523	S
CTGCAGGAGCGAACTG-1_1_1_1_1_1_1	NT1	663	453	3.31825	Singlet	0.039548	21	21	NT	Others	-0.0333432	-0.0256567	G1
CTGCAGGAGTAAGACT-1_1_1_1_1_1_1	NT1	4799	1598	8.16837	Singlet	0.0480226	3	3	NT	T_cells	-0.0157627	-0.0148816	G1
CTGCAGGTCTGCATGA-1_1_1_1_1_1_1	NT1	719	411	5.28512	Singlet	0.0451977	0	0	NT	T_cells	-0.0116533	-0.00993093	G1
CTGCATCGTCATTCCC-1_1_1_1_1_1_1	NT1	4434	1631	6.33739	Singlet	0.101695	3	3	NT	T_cells	-0.0301353	0.0817381	G2M
CTGCATCTCCTATTGT-1_1_1_1_1_1_1	NT1	1313	616	3.19878	Singlet	0.0367232	7	7	NT	Myeloid_cells	-0.0333354	0.0314216	G2M
CTGCATCTCTCCACTG-1_1_1_1_1_1_1	NT1	979	549	3.47293	Singlet	0.0451977	7	7	NT	Myeloid_cells	-0.0374216	0.025622	G2M
CTGCCATTCGGACTTA-1_1_1_1_1_1_1	NT1	1375	627	1.6	Singlet	0.0310734	2	2	NT	Myeloid_cells	-0.0299081	-0.0413398	G1
CTGCCTAAGACTTAAG-1_1_1_1_1_1_1	NT1	1063	499	8.65475	Singlet	0.0762712	6	6	NT	Myeloid_cells	-0.0234899	-0.0367134	G1
CTGCCTAAGGATATAC-1_1_1_1_1_1_1	NT1	32005	1341	0.0437432	Singlet	0.271186	10	10	NT	NK_cells	-0.0205527	-0.0373428	G1
CTGCCTATCACCCTGT-1_1_1_1_1_1_1	NT1	1269	703	12.3719	Singlet	0.211864	14	14	NT	CAFs	0.00568146	-0.0783905	S
CTGCCTATCAGACCTA-1_1_1_1_1_1_1	NT1	4392	1598	4.91803	Singlet	0.118644	3	3	NT	T_cells	-0.00288242	-0.00475885	G1
CTGCCTATCATCCTAT-1_1_1_1_1_1_1	NT1	3584	1410	3.45982	Singlet	0.0310734	8	8	NT	T_cells	0.100674	0.0215831	S
CTGCCTATCTCTTAAC-1_1_1_1_1_1_1	NT1	779	412	27.7279	Singlet	0.0621469	1	1	NT	Ductal_cells	0.049091	-0.0579341	S
CTGCGAGCAATAGAGT-1_1_1_1_1_1_1	NT1	6089	1547	7.71884	Singlet	0.206215	13	13	NT	B_cells	0.0627638	-0.0165031	S
CTGCGAGCACTCGATA-1_1_1_1_1_1_1	NT1	1048	546	2.48092	Singlet	0.00564972	2	2	NT	Myeloid_cells	-0.0273138	-0.0503704	G1
CTGCGAGCATTCACCC-1_1_1_1_1_1_1	NT1	5137	1728	6.96905	Singlet	0.355932	6	6	NT	Myeloid_cells	0.00886425	-0.0539339	S
CTGCGAGGTAGAATAC-1_1_1_1_1_1_1	NT1	1451	730	3.17023	Singlet	0.0706215	7	7	NT	Myeloid_cells	0.0136664	0.0285638	G2M
CTGCGAGTCGAACGGA-1_1_1_1_1_1_1	NT1	1125	637	7.2	Singlet	0.107345	4	4	NT	Myeloid_cells	-0.0474085	-0.0485852	G1
CTGCTCACAGCCCAGT-1_1_1_1_1_1_1	NT1	590	377	4.0678	Singlet	0.0734463	4	4	NT	Myeloid_cells	0.333846	0.0388931	S
CTGCTCAGTGAGTGAC-1_1_1_1_1_1_1	NT1	4391	1567	7.60647	Singlet	0.0706215	3	3	NT	T_cells	0.00964975	0.0568069	G2M
CTGCTCATCTCTTCAA-1_1_1_1_1_1_1	NT1	4571	1647	8.5758	Singlet	0.146893	3	3	NT	T_cells	0.0401517	-0.0151196	S
CTGGACGAGCTGACAG-1_1_1_1_1_1_1	NT1	889	475	7.31159	Singlet	0.0847458	4	4	NT	Myeloid_cells	-0.0328932	-0.0758861	G1
CTGGACGAGTATAGGT-1_1_1_1_1_1_1	NT1	5025	345	0.0597015	Singlet	0.242938	10	10	NT	NK_cells	-0.00953235	-0.0312126	G1
CTGGACGCACGATAGG-1_1_1_1_1_1_1	NT1	5962	1712	5.85374	Singlet	0.358757	6	6	NT	Myeloid_cells	0.0399396	0.0204209	S
CTGGACGCACTTCATT-1_1_1_1_1_1_1	NT1	610	376	7.86885	Singlet	0.0451977	14	14	NT	CAFs	-0.0327376	-0.0614643	G1
CTGGACGCATCATCTT-1_1_1_1_1_1_1	NT1	4327	1522	3.16617	Singlet	0.0960452	9	9	NT	NK_cells	0.0179006	0.0461481	G2M
CTGGACGTCTAGTTCT-1_1_1_1_1_1_1	NT1	5077	1737	4.78629	Singlet	0.132768	0	0	NT	T_cells	0.053043	-0.0068766	S
CTGGCAGAGCATTGAA-1_1_1_1_1_1_1	NT1	3724	1387	7.5188	Singlet	0.0367232	3	3	NT	T_cells	0.0519713	-0.0516254	S
CTGGCAGAGGCGAAGG-1_1_1_1_1_1_1	NT1	3845	1318	4.81144	Singlet	0.019774	0	0	NT	T_cells	-0.0135194	0.0246789	G2M
CTGGCAGGTAGGGTAC-1_1_1_1_1_1_1	NT1	560	306	5.71429	Singlet	0.132768	10	10	NT	NK_cells	-0.0270501	-0.0448619	G1
CTGGCAGGTCAATGGG-1_1_1_1_1_1_1	NT1	1782	826	1.29068	Singlet	0.0762712	7	7	NT	Myeloid_cells	0.0134988	0.0700457	G2M
CTGGCAGGTGACAGGT-1_1_1_1_1_1_1	NT1	2389	845	6.1532	Singlet	0.0112994	8	8	NT	T_cells	0.0157951	-0.0600796	S
CTGGCAGGTTCTCCCA-1_1_1_1_1_1_1	NT1	923	471	8.4507	Singlet	0	2	2	NT	Myeloid_cells	-0.0171478	0.0276588	G2M
CTGGCAGGTTTCGGCG-1_1_1_1_1_1_1	NT1	858	508	8.50816	Singlet	0.0960452	4	4	NT	Myeloid_cells	-0.0248107	-0.0278935	G1
CTGGTCTAGACCAAAT-1_1_1_1_1_1_1	NT1	1657	821	7.0006	Singlet	0.0734463	7	7	NT	Myeloid_cells	-0.0323978	-0.0170815	G1
CTGGTCTAGGTATCTC-1_1_1_1_1_1_1	NT1	650	447	11.2308	Singlet	0.127119	11	11	NT	Ductal_cells	-0.0404531	-0.0150541	G1
CTGGTCTTCGCCAGAC-1_1_1_1_1_1_1	NT1	629	352	3.33863	Singlet	0	2	2	NT	Myeloid_cells	-0.0234627	-0.0142841	G1
CTGTACCAGCCGGAAT-1_1_1_1_1_1_1	NT1	1064	497	1.78571	Singlet	0.00847458	2	2	NT	Myeloid_cells	-0.0273999	0.0317244	G2M
CTGTAGAAGACGCATG-1_1_1_1_1_1_1	NT1	7631	523	0.0262089	Singlet	0.262712	10	10	NT	NK_cells	-0.0121162	-0.0354819	G1
CTGTAGAAGTATCTGC-1_1_1_1_1_1_1	NT1	1302	676	5.83717	Singlet	0.141243	4	4	NT	Myeloid_cells	-0.0385702	-0.0502021	G1
CTGTAGACACGCCAGT-1_1_1_1_1_1_1	NT1	5899	1909	6.05187	Singlet	0.333333	14	14	NT	CAFs	-0.0428968	-0.062752	G1
CTGTAGACAGTGTGCC-1_1_1_1_1_1_1	NT1	3354	1224	4.47227	Singlet	0.0112994	3	3	NT	T_cells	0.0570343	0.0347527	S
CTGTAGACATCGTGGC-1_1_1_1_1_1_1	NT1	3986	1319	20.4215	Singlet	0.0112994	3	3	NT	T_cells	-0.0139242	0.0159845	G2M
CTGTAGAGTACCTAAC-1_1_1_1_1_1_1	NT1	5393	1764	6.43427	Singlet	0.358757	6	6	NT	Myeloid_cells	-0.0229205	0.00299586	G2M
CTGTATTGTTTGCAGT-1_1_1_1_1_1_1	NT1	2549	962	2.70694	Singlet	0.0734463	7	7	NT	Myeloid_cells	-0.042565	0.013017	G2M
CTGTCGTAGGTCACCC-1_1_1_1_1_1_1	NT1	1273	566	8.95522	Singlet	0.0875706	6	6	NT	Myeloid_cells	-0.0340715	-0.0441517	G1
CTGTCGTCACCATTCC-1_1_1_1_1_1_1	NT1	3757	1380	4.84429	Singlet	0.0169492	3	3	NT	T_cells	0.0642798	-0.0648393	S
CTGTCGTTCGAGAAAT-1_1_1_1_1_1_1	NT1	506	335	7.31225	Singlet	0.0338983	18	18	NT	T_cells	0.0585973	-0.00376426	S
CTGTGAACACGTAGAG-1_1_1_1_1_1_1	NT1	6229	1759	4.92856	Singlet	0.361582	6	6	NT	Myeloid_cells	0.0183526	-0.0310505	S
CTGTGGGAGGACAAGA-1_1_1_1_1_1_1	NT1	4896	1813	8.90523	Singlet	0.344633	14	14	NT	CAFs	0.00695457	-0.0339759	S
CTTACCGAGCCACAAG-1_1_1_1_1_1_1	NT1	1118	607	3.48837	Singlet	0.0338983	7	7	NT	Myeloid_cells	-0.0333424	-0.0198704	G1
CTTACCGAGCTCCGAC-1_1_1_1_1_1_1	NT1	813	456	5.41205	Singlet	0.0903955	1	1	NT	Ductal_cells	-0.0318888	-0.00996502	G1
CTTACCGAGTGTTCAC-1_1_1_1_1_1_1	NT1	1279	623	1.09461	Singlet	0.0282486	2	2	NT	Myeloid_cells	-0.0279985	0.108833	G2M
CTTACCGCAAATGAGT-1_1_1_1_1_1_1	NT1	9471	2465	11.0337	Singlet	0.370056	14	14	NT	CAFs	-0.0745164	-0.0567166	G1
CTTACCGTCACAGTGT-1_1_1_1_1_1_1	NT1	1892	418	0.105708	Singlet	0.127119	24	24	NT	Others	-0.0301739	-0.0499435	G1
CTTACCGTCTACTGCC-1_1_1_1_1_1_1	NT1	1675	663	7.8806	Singlet	0.0338983	2	2	NT	Myeloid_cells	-0.0362519	0.0240071	G2M
CTTAGGAAGAGTCACG-1_1_1_1_1_1_1	NT1	568	355	7.39437	Singlet	0.0451977	4	4	NT	Myeloid_cells	-0.0225798	-0.00770568	G1
CTTAGGACACATTCGA-1_1_1_1_1_1_1	NT1	3839	1395	6.82469	Singlet	0.019774	3	3	NT	T_cells	-0.0494152	-0.0573055	G1
CTTAGGATCTGTTGGA-1_1_1_1_1_1_1	NT1	869	450	5.40852	Singlet	0.0338983	4	4	NT	Myeloid_cells	0.0421066	-0.0237353	S
CTTAGGATCTTCGTGC-1_1_1_1_1_1_1	NT1	3127	1124	7.61113	Singlet	0.00282486	3	3	NT	T_cells	0.000123939	-0.023108	S
CTTCAATAGTGCACCC-1_1_1_1_1_1_1	NT1	3933	1387	6.12764	Singlet	0.0169492	3	3	NT	T_cells	-0.0289774	-0.0213228	G1
CTTCAATCAACCAACT-1_1_1_1_1_1_1	NT1	3733	1289	7.39352	Singlet	0.0112994	8	8	NT	T_cells	0.0223688	-0.0276987	S
CTTCAATCACACCGAC-1_1_1_1_1_1_1	NT1	581	315	15.3184	Singlet	0.00564972	2	2	NT	Myeloid_cells	-0.0143047	0.0720746	G2M
CTTCAATCAGCTACCG-1_1_1_1_1_1_1	NT1	3703	1508	4.23981	Singlet	0.248588	9	9	NT	NK_cells	0.105602	-0.0691617	S
CTTCAATGTTAAGGAT-1_1_1_1_1_1_1	NT1	2142	926	1.12045	Singlet	0.0847458	7	7	NT	Myeloid_cells	-0.0416323	0.0604915	G2M
CTTCAATTCACGAGGA-1_1_1_1_1_1_1	NT1	1676	778	4.8926	Singlet	0.0141243	3	3	NT	T_cells	-0.0278894	0.00751753	G2M
CTTCCGATCACGAACT-1_1_1_1_1_1_1	NT1	4828	1455	5.19884	Singlet	0.206215	13	13	NT	B_cells	0.072577	-0.0518259	S
CTTCCGATCCGTTGGG-1_1_1_1_1_1_1	NT1	536	315	5.22388	Singlet	0.0367232	4	4	NT	Myeloid_cells	-0.0128459	-0.0523167	G1
CTTCCGATCTAGTGAC-1_1_1_1_1_1_1	NT1	535	315	2.80374	Singlet	0.0112994	2	2	NT	Myeloid_cells	-0.0261184	0.105861	G2M
CTTCCTTCACTACTTT-1_1_1_1_1_1_1	NT1	5042	1960	14.2007	Singlet	0.347458	14	14	NT	CAFs	-0.0233046	-0.0556646	G1
CTTCCTTCAGCGGATA-1_1_1_1_1_1_1	NT1	2435	916	11.0883	Singlet	0.310734	6	6	NT	Myeloid_cells	-0.0278027	-0.0224014	G1
CTTCCTTTCTGTCGCT-1_1_1_1_1_1_1	NT1	4127	1487	4.19191	Singlet	0.0508475	12	12	NT	T_cells	-0.0176761	0.0446719	G2M
CTTCCTTTCTTTCCAA-1_1_1_1_1_1_1	NT1	2323	930	26.6466	Singlet	0.200565	4	4	NT	Myeloid_cells	-0.00444262	-0.0429611	G1
CTTCGGTAGCACTCTA-1_1_1_1_1_1_1	NT1	6413	2063	10.1824	Singlet	0.353107	4	4	NT	Myeloid_cells	0.0132025	-0.0740224	S
CTTCGGTAGTCTGGTT-1_1_1_1_1_1_1	NT1	19680	780	0.497967	Singlet	0.254237	10	10	NT	NK_cells	-0.0157908	-0.0338982	G1
CTTCGGTCAAGTCGTT-1_1_1_1_1_1_1	NT1	1065	505	13.9906	Singlet	0.0564972	4	4	NT	Myeloid_cells	-0.0220627	-0.0153493	G1
CTTCGGTCACTATGTG-1_1_1_1_1_1_1	NT1	563	346	4.61812	Singlet	0.00564972	2	2	NT	Myeloid_cells	-0.0243044	0.00203111	G2M
CTTCGGTTCAAGAGGC-1_1_1_1_1_1_1	NT1	3548	1219	5.7779	Singlet	0.0225989	3	3	NT	T_cells	-0.00632592	-0.00431674	G1
CTTCGGTTCGGTTAGT-1_1_1_1_1_1_1	NT1	4798	1521	5.14798	Singlet	0.0706215	3	3	NT	T_cells	0.0603301	-0.0619357	S
CTTCTAAAGAGGGTAA-1_1_1_1_1_1_1	NT1	909	548	6.71067	Singlet	0.0988701	4	4	NT	Myeloid_cells	-0.0317756	0.0114992	G2M
CTTCTAAAGGCGACAT-1_1_1_1_1_1_1	NT1	1554	744	24.0026	Singlet	0.0762712	22	22	NT	Ductal_cells	-0.0484252	-0.0586906	G1
CTTCTAACAGATAAAC-1_1_1_1_1_1_1	NT1	1053	507	3.79867	Singlet	0.0141243	2	2	NT	Myeloid_cells	-0.0250049	0.0131468	G2M
CTTCTAATCACAGAGG-1_1_1_1_1_1_1	NT1	3750	1314	6.02667	Singlet	0.019774	3	3	NT	T_cells	-0.0391823	-0.0280216	G1
CTTCTAATCACCATAG-1_1_1_1_1_1_1	NT1	1038	433	10.2119	Singlet	0.0508475	7	7	NT	Myeloid_cells	-0.0178517	0.0492466	G2M
CTTCTCTCAGGTTCGC-1_1_1_1_1_1_1	NT1	5063	1641	7.56468	Singlet	0.367232	6	6	NT	Myeloid_cells	-0.030953	-0.0300218	G1
CTTCTCTGTCTTAGTG-1_1_1_1_1_1_1	NT1	4383	1591	1.30048	Singlet	0.310734	21	21	NT	Others	0.00115987	-0.0390124	S
CTTCTCTGTTTACTTC-1_1_1_1_1_1_1	NT1	3122	1446	0.0640615	Singlet	0.330508	22	22	NT	Ductal_cells	0.0145145	-0.100199	S
CTTCTCTTCGCATTAG-1_1_1_1_1_1_1	NT1	726	435	24.5179	Singlet	0.0706215	18	18	NT	T_cells	-0.0371508	-0.0545655	G1
CTTCTCTTCTGTAACG-1_1_1_1_1_1_1	NT1	4957	1726	4.80129	Singlet	0.163842	3	3	NT	T_cells	-0.00210676	-0.0176899	G1
CTTGAGACAGTTGCGC-1_1_1_1_1_1_1	NT1	3849	1422	8.44375	Singlet	0.305085	4	4	NT	Myeloid_cells	-0.031906	-0.0111645	G1
CTTGAGATCTAGTGAC-1_1_1_1_1_1_1	NT1	3947	1480	5.44718	Singlet	0.0677966	8	8	NT	T_cells	0.0781376	-0.0832847	S
CTTGATTAGGAGTATT-1_1_1_1_1_1_1	NT1	530	341	6.79245	Singlet	0.0423729	14	14	NT	CAFs	-0.0379016	-0.0520229	G1
CTTGATTCAATTAGGA-1_1_1_1_1_1_1	NT1	5265	1719	7.1415	Singlet	0.350282	6	6	NT	Myeloid_cells	-0.0280405	-0.057488	G1
CTTGATTGTGGGCTCT-1_1_1_1_1_1_1	NT1	3543	1201	6.6328	Singlet	0.353107	6	6	NT	Myeloid_cells	-0.0155824	-0.100277	G1
CTTGATTTCCATTGTT-1_1_1_1_1_1_1	NT1	5215	1775	4.81304	Singlet	0.169492	3	3	NT	T_cells	-0.00363603	-0.0210058	G1
CTTGATTTCTATACGG-1_1_1_1_1_1_1	NT1	518	346	14.6718	Singlet	0.0875706	11	11	NT	Ductal_cells	-0.0412245	-0.0697612	G1
CTTTCAAAGACTCAAA-1_1_1_1_1_1_1	NT1	6382	1994	9.05672	Singlet	0.189266	3	3	NT	T_cells	0.0374961	0.0199124	S
CTTTCAACAAATCCCA-1_1_1_1_1_1_1	NT1	4499	1529	6.02356	Singlet	0.039548	3	3	NT	T_cells	0.118973	0.000883504	S
GAAACCTAGCGACAGT-1_1_1_1_1_1_1	NT1	602	346	7.6412	Singlet	0.0423729	8	8	NT	T_cells	-0.0159069	0.0122374	G2M
GAAACCTGTGCCGTAC-1_1_1_1_1_1_1	NT1	848	483	2.12264	Singlet	0.00282486	2	2	NT	Myeloid_cells	-0.0137831	0.0329998	G2M
GAAACCTTCATCTATC-1_1_1_1_1_1_1	NT1	639	362	16.1189	Singlet	0.0169492	16	16	NT	Myeloid_cells	-0.0142709	-0.00416505	G1
GAAACCTTCCCAGGCA-1_1_1_1_1_1_1	NT1	690	362	4.49275	Singlet	0.0338983	19	19	NT	Myeloid_cells	-0.0253269	-0.00970426	G1
GAAATGAAGTGCCAGA-1_1_1_1_1_1_1	NT1	2806	1213	7.44833	Singlet	0.288136	4	4	NT	Myeloid_cells	-0.056429	-0.030031	G1
GAAATGACAAGCGCAA-1_1_1_1_1_1_1	NT1	3687	1249	3.44453	Singlet	0.0141243	0	0	NT	T_cells	0.00892246	-0.0148491	S
GAACACTCAACCCTCT-1_1_1_1_1_1_1	NT1	3311	1351	4.31894	Singlet	0.0508475	3	3	NT	T_cells	0.082615	-0.0870545	S
GAACACTCAGACATCT-1_1_1_1_1_1_1	NT1	3923	1355	11.063	Singlet	0.00564972	3	3	NT	T_cells	-0.0148294	-0.0553078	G1
GAACGTTAGGAAAGTG-1_1_1_1_1_1_1	NT1	6219	1941	4.19682	Singlet	0.245763	3	3	NT	T_cells	-0.0286186	-0.00663969	G1
GAACGTTCAGCTGAGA-1_1_1_1_1_1_1	NT1	3039	1088	7.43666	Singlet	0.00564972	3	3	NT	T_cells	-0.0100565	-0.0628548	G1
GAACGTTTCAAAGGAT-1_1_1_1_1_1_1	NT1	1198	592	5.09182	Singlet	0.110169	4	4	NT	Myeloid_cells	-0.0293129	-0.0183168	G1
GAACGTTTCGCCGATG-1_1_1_1_1_1_1	NT1	5173	1745	5.66402	Singlet	0.358757	6	6	NT	Myeloid_cells	0.0985884	-0.0207827	S
GAACTGTGTCACGTGC-1_1_1_1_1_1_1	NT1	7086	2243	10.1468	Singlet	0.358757	14	14	NT	CAFs	-0.00687382	-0.068507	G1
GAACTGTGTGCCTACG-1_1_1_1_1_1_1	NT1	3224	1224	10.794	Singlet	0.0169492	3	3	NT	T_cells	0.0248314	0.00314806	S
GAACTGTTCCATTGGA-1_1_1_1_1_1_1	NT1	878	522	6.15034	Singlet	0.101695	4	4	NT	Myeloid_cells	-0.0386805	-0.0775211	G1
GAAGAATCATTGTGCA-1_1_1_1_1_1_1	NT1	4497	1757	7.04914	Singlet	0.285311	9	9	NT	NK_cells	-0.0372768	-0.00454792	G1
GAAGAATGTACAACGG-1_1_1_1_1_1_1	NT1	2964	1058	5.19568	Singlet	0.0169492	0	0	NT	T_cells	0.0323678	0.0232176	S
GAAGAATGTTGCTAGT-1_1_1_1_1_1_1	NT1	5327	2004	3.6606	Singlet	0.338983	21	21	NT	Others	-0.0349143	-0.110149	G1
GAAGCCCTCCCTTGTG-1_1_1_1_1_1_1	NT1	5523	2024	11.262	Singlet	0.367232	14	14	NT	CAFs	-0.0539708	-0.0386019	G1
GAAGCCCTCGCATTAG-1_1_1_1_1_1_1	NT1	4844	1785	5.82164	Singlet	0.254237	9	9	NT	NK_cells	0.0300297	0.0236773	S
GAAGCGAAGGTATTGA-1_1_1_1_1_1_1	NT1	3168	1158	13.6048	Singlet	0.0367232	17	17	NT	NK_cells	-0.0137463	-0.039167	G1
GAAGCGACATATCGGT-1_1_1_1_1_1_1	NT1	7242	413	0.041425	Singlet	0.254237	10	10	NT	NK_cells	-0.0159248	-0.0310182	G1
GAAGCGAGTGACCGAA-1_1_1_1_1_1_1	NT1	5263	1496	6.7262	Singlet	0.220339	13	13	NT	B_cells	-0.00918856	0.00300388	G2M
GAAGCGATCGCCTATC-1_1_1_1_1_1_1	NT1	765	455	4.05229	Singlet	0.0706215	14	14	NT	CAFs	-0.0330167	-0.0238042	G1
GAAGCGATCGGACCAC-1_1_1_1_1_1_1	NT1	5326	1726	8.89974	Singlet	0.364407	6	6	NT	Myeloid_cells	0.0565139	-0.0116282	S
GAAGGACCATTGCTGA-1_1_1_1_1_1_1	NT1	666	365	9.15916	Singlet	0.079096	4	4	NT	Myeloid_cells	0.0415884	0.0536857	G2M
GAAGGGTAGCAACAAT-1_1_1_1_1_1_1	NT1	3959	1306	5.17808	Singlet	0.0112994	3	3	NT	T_cells	-0.0165176	-0.034836	G1
GAAGGGTAGCATGGGT-1_1_1_1_1_1_1	NT1	1285	652	8.40467	Singlet	0.115819	11	11	NT	Ductal_cells	-0.0342652	0.00705412	G2M
GAAGGGTCACCTCAGG-1_1_1_1_1_1_1	NT1	863	407	4.51912	Singlet	0.0875706	4	4	NT	Myeloid_cells	-0.0256115	-0.0599901	G1
GAAGGGTTCCCGATCT-1_1_1_1_1_1_1	NT1	3503	1351	4.96717	Singlet	0.019774	3	3	NT	T_cells	-0.0434937	-0.0195325	G1
GAAGTAACAGCGATTT-1_1_1_1_1_1_1	NT1	3901	1429	8.66445	Singlet	0.0367232	3	3	NT	T_cells	0.0411773	-0.0752864	S
GAAGTAACAGGGATAC-1_1_1_1_1_1_1	NT1	1201	456	7.99334	Singlet	0.0480226	4	4	NT	Myeloid_cells	-0.0233878	-0.0629251	G1
GAAGTAATCGTGGCTG-1_1_1_1_1_1_1	NT1	4400	1505	5.38636	Singlet	0.0338983	3	3	NT	T_cells	-0.0261317	-0.0132287	G1
GAATAGAAGACCACGA-1_1_1_1_1_1_1	NT1	1562	703	3.52113	Singlet	0.0338983	2	2	NT	Myeloid_cells	-0.0377732	0.0941005	G2M
GAATAGACACAGTCGC-1_1_1_1_1_1_1	NT1	777	528	9.52381	Singlet	0.0819209	20	20	NT	Ductal_cells	-0.0360508	0.022356	G2M
GAATAGAGTGACACGA-1_1_1_1_1_1_1	NT1	8332	2128	6.62506	Singlet	0.336158	14	14	NT	CAFs	0.0586028	-0.0604169	S
GAATCACAGCCATTCA-1_1_1_1_1_1_1	NT1	4288	826	2.21549	Singlet	0.135593	24	24	NT	Others	-0.020016	-0.0635584	G1
GAATCACAGGCTAGCA-1_1_1_1_1_1_1	NT1	1212	587	4.45545	Singlet	0.115819	4	4	NT	Myeloid_cells	0.0256374	-0.081751	S
GAATCACAGTCCGCCA-1_1_1_1_1_1_1	NT1	5755	1761	7.00261	Singlet	0.353107	6	6	NT	Myeloid_cells	-0.0101798	-0.0135574	G1
GAATCACCAGCGTATT-1_1_1_1_1_1_1	NT1	5364	1798	3.72856	Singlet	0.189266	9	9	NT	NK_cells	-0.0315984	-0.0546921	G1
GAATCGTCACATGTTG-1_1_1_1_1_1_1	NT1	7832	1749	4.40501	Singlet	0.29096	4	4	NT	Myeloid_cells	-0.0576341	-0.0564665	G1
GAATCGTCACCGTCTT-1_1_1_1_1_1_1	NT1	1014	425	2.95858	Singlet	0.0734463	4	4	NT	Myeloid_cells	-0.0212132	-0.0172308	G1
GAATCGTGTGTGGTCC-1_1_1_1_1_1_1	NT1	5678	1843	7.37936	Singlet	0.378531	6	6	NT	Myeloid_cells	-0.0155784	-0.0378428	G1
GACACGCAGATCCTAC-1_1_1_1_1_1_1	NT1	1094	462	2.01097	Singlet	0.00282486	2	2	NT	Myeloid_cells	-0.0218059	0.032066	G2M
GACACGCGTTTAGTCG-1_1_1_1_1_1_1	NT1	1238	537	4.84653	Singlet	0.0847458	4	4	NT	Myeloid_cells	-0.0182156	-0.0712768	G1
GACACGCTCTCCAAGA-1_1_1_1_1_1_1	NT1	4289	1468	8.53346	Singlet	0.347458	6	6	NT	Myeloid_cells	0.00502547	0.00102562	S
GACAGCCCAAGCCTGC-1_1_1_1_1_1_1	NT1	5395	1754	6.32067	Singlet	0.361582	6	6	NT	Myeloid_cells	-0.0079613	-0.0010926	G1
GACAGCCTCGCAGTTA-1_1_1_1_1_1_1	NT1	4228	1498	5.43992	Singlet	0.0423729	0	0	NT	T_cells	-0.0613535	-0.0427798	G1
GACATCAAGATACTGA-1_1_1_1_1_1_1	NT1	5141	2023	4.80451	Singlet	0.378531	21	21	NT	Others	-0.0633761	-0.109134	G1
GACATCAAGCAATAAC-1_1_1_1_1_1_1	NT1	909	535	5.94059	Singlet	0.0621469	14	14	NT	CAFs	-0.0364309	0.0129363	G2M
GACCAATCAAGACCTT-1_1_1_1_1_1_1	NT1	1273	759	9.11233	Singlet	0.161017	20	20	NT	Ductal_cells	-0.0531054	-0.0223043	G1
GACCCAGCACTCACTC-1_1_1_1_1_1_1	NT1	4412	1240	0.543971	Singlet	0.211864	24	24	NT	Others	-0.0445753	-0.106081	G1
GACCCAGGTCTATGAC-1_1_1_1_1_1_1	NT1	1351	661	6.58771	Singlet	0.0112994	0	0	NT	T_cells	0.0322285	-0.0408901	S
GACCCAGGTTCTCCCA-1_1_1_1_1_1_1	NT1	1686	819	2.37248	Singlet	0.0734463	7	7	NT	Myeloid_cells	-0.0353269	-0.0307313	G1
GACCCAGTCTAGGAAA-1_1_1_1_1_1_1	NT1	4232	1540	4.84405	Singlet	0.0875706	3	3	NT	T_cells	-0.0185184	-0.0560564	G1
GACCCAGTCTCACGAA-1_1_1_1_1_1_1	NT1	7750	1996	11.8323	Singlet	0.310734	14	14	NT	CAFs	-0.0292286	-0.0619243	G1
GACCCAGTCTTTGCAT-1_1_1_1_1_1_1	NT1	6092	1901	6.56599	Singlet	0.172316	3	3	NT	T_cells	-0.00553183	-0.0262635	G1
GACCCTTAGGACGCAT-1_1_1_1_1_1_1	NT1	666	403	12.6126	Singlet	0.0988701	11	11	NT	Ductal_cells	-0.0379484	-0.052989	G1
GACCCTTCAAGAGAGA-1_1_1_1_1_1_1	NT1	5054	1705	7.75623	Singlet	0.124294	3	3	NT	T_cells	-0.00184587	-0.00520189	G1
GACCCTTTCGTCTCAC-1_1_1_1_1_1_1	NT1	1365	706	3.80952	Singlet	0.0706215	7	7	NT	Myeloid_cells	-0.0451765	-0.000463613	G1
GACCGTGTCCGTCAAA-1_1_1_1_1_1_1	NT1	1635	757	1.34557	Singlet	0.0706215	2	2	NT	Myeloid_cells	-0.0442296	0.0280222	G2M
GACCTTCTCGTGTTCC-1_1_1_1_1_1_1	NT1	750	497	4.66667	Singlet	0.0508475	0	0	NT	T_cells	-0.0315754	-0.0681193	G1
GACGCTGAGGGTTTCT-1_1_1_1_1_1_1	NT1	2773	1135	5.76992	Singlet	0.00847458	3	3	NT	T_cells	-0.0125335	-0.0090801	G1
GACGCTGCAGAGTGTG-1_1_1_1_1_1_1	NT1	5870	1343	4.46337	Singlet	0.0282486	0	0	NT	T_cells	0.0136055	-0.0209891	S
GACGCTGCAGCAGTCC-1_1_1_1_1_1_1	NT1	3639	1382	5.00137	Singlet	0.0451977	8	8	NT	T_cells	0.0843654	-0.0636087	S
GACGCTGCAGGCACTC-1_1_1_1_1_1_1	NT1	1719	794	1.27981	Singlet	0.0706215	7	7	NT	Myeloid_cells	0.00806977	0.0201727	G2M
GACGCTGGTGATACTC-1_1_1_1_1_1_1	NT1	630	365	4.92063	Singlet	0.0338983	19	19	NT	Myeloid_cells	-0.0156694	0.0526514	G2M
GACGCTGTCCAAGAGG-1_1_1_1_1_1_1	NT1	955	547	2.82723	Singlet	0.00847458	7	7	NT	Myeloid_cells	-0.030865	-0.00838869	G1
GACGTTAAGAGAGCGG-1_1_1_1_1_1_1	NT1	3809	1431	8.84747	Singlet	0.0282486	3	3	NT	T_cells	0.0832551	0.00263423	S
GACGTTAGTAGAGATT-1_1_1_1_1_1_1	NT1	870	420	5.28736	Singlet	0.0451977	1	1	NT	Ductal_cells	-0.0140033	0.0413442	G2M
GACTATGAGACTGTTC-1_1_1_1_1_1_1	NT1	4044	1384	5.58853	Singlet	0.0169492	8	8	NT	T_cells	0.077368	-0.0808187	S
GACTATGAGATAGTGT-1_1_1_1_1_1_1	NT1	36962	1321	0.110925	Singlet	0.265537	10	10	NT	NK_cells	-0.0108209	-0.0395098	G1
GACTCAAGTCTACGTA-1_1_1_1_1_1_1	NT1	2982	1140	5.03018	Singlet	0.00282486	3	3	NT	T_cells	0.0501664	0.00721288	S
GACTCAATCCTTCTGG-1_1_1_1_1_1_1	NT1	575	389	5.3913	Singlet	0.0649718	14	14	NT	CAFs	0.0968096	-0.0516707	S
GACTCAATCTCGCAGG-1_1_1_1_1_1_1	NT1	1893	832	2.53566	Singlet	0.0706215	7	7	NT	Myeloid_cells	0.0123593	0.0294597	G2M
GACTCTCAGTATTCCG-1_1_1_1_1_1_1	NT1	1086	543	6.44567	Singlet	0.019774	18	18	NT	T_cells	-0.0286282	-0.00611973	G1
GACTCTCCACACAGCC-1_1_1_1_1_1_1	NT1	1361	810	2.13079	Singlet	0.146893	21	21	NT	Others	0.0151777	0.0307976	G2M
GACTCTCCAGTCAGCC-1_1_1_1_1_1_1	NT1	809	459	7.04574	Singlet	0	2	2	NT	Myeloid_cells	-0.0207642	-0.00251939	G1
GACTCTCTCAAAGACA-1_1_1_1_1_1_1	NT1	3077	1612	9.32727	Singlet	0.293785	20	20	NT	Ductal_cells	-0.00674512	-0.0155759	G1
GACTGATAGGATGGCT-1_1_1_1_1_1_1	NT1	3296	1282	7.64563	Singlet	0.0169492	3	3	NT	T_cells	0.0115337	-0.00586867	S
GACTGATGTAACTGCT-1_1_1_1_1_1_1	NT1	1055	596	3.41232	Singlet	0.0847458	14	14	NT	CAFs	0.0248212	-0.0424524	S
GACTTCCGTCAAGCCC-1_1_1_1_1_1_1	NT1	2966	1271	3.60755	Singlet	0.0338983	17	17	NT	NK_cells	0.0261645	-0.094255	S
GACTTCCTCCGATGTA-1_1_1_1_1_1_1	NT1	924	501	3.0303	Singlet	0.0112994	2	2	NT	Myeloid_cells	0.0450095	0.0210553	S
GACTTCCTCGACGATT-1_1_1_1_1_1_1	NT1	3408	1359	6.6608	Singlet	0.0338983	3	3	NT	T_cells	0.114361	-0.0639091	S
GACTTCCTCGTGGCGT-1_1_1_1_1_1_1	NT1	2178	1116	4.45363	Singlet	0.237288	21	21	NT	Others	-0.0107126	-0.0746858	G1
GAGAAATAGCAAATCA-1_1_1_1_1_1_1	NT1	1786	581	1.17581	Singlet	0.129944	24	24	NT	Others	-0.0170338	-0.0249054	G1
GAGAAATCAGACAAGC-1_1_1_1_1_1_1	NT1	4137	1552	5.43872	Singlet	0.0847458	8	8	NT	T_cells	-0.0538897	-0.0260535	G1
GAGAAATTCGCCGAAC-1_1_1_1_1_1_1	NT1	3255	1155	0.675883	Singlet	0.0819209	7	7	NT	Myeloid_cells	0.0245184	0.0346924	G2M
GAGACTTAGAGAGGGC-1_1_1_1_1_1_1	NT1	3362	1417	22.5164	Singlet	0.299435	14	14	NT	CAFs	-0.0685035	-0.0283221	G1
GAGACTTCACCAGTAT-1_1_1_1_1_1_1	NT1	4611	1844	8.58816	Singlet	0.29661	9	9	NT	NK_cells	0.02058	-0.0594261	S
GAGACTTCACGCTGCA-1_1_1_1_1_1_1	NT1	5032	385	0.0198728	Singlet	0.248588	10	10	NT	NK_cells	0.016996	-0.0382812	S
GAGACTTCAGCTGTTA-1_1_1_1_1_1_1	NT1	5276	1692	6.38741	Singlet	0.353107	6	6	NT	Myeloid_cells	-0.00985791	-0.0347228	G1
GAGAGGTGTAACATCC-1_1_1_1_1_1_1	NT1	27941	1074	0.830321	Singlet	0.262712	10	10	NT	NK_cells	-0.0115052	-0.0337366	G1
GAGAGGTGTACGATTC-1_1_1_1_1_1_1	NT1	5810	442	0.0172117	Singlet	0.248588	10	10	NT	NK_cells	-0.0139501	-0.0346386	G1
GAGAGGTTCCCGTTGT-1_1_1_1_1_1_1	NT1	3194	1594	7.85848	Singlet	0.327684	20	20	NT	Ductal_cells	0.103982	-0.0233948	S
GAGAGGTTCTTGATTC-1_1_1_1_1_1_1	NT1	3212	1219	5.44832	Singlet	0.0112994	8	8	NT	T_cells	-0.00716436	-0.0226463	G1
GAGATGGAGGAGAGTA-1_1_1_1_1_1_1	NT1	7759	2380	5.67083	Singlet	0.367232	4	4	NT	Myeloid_cells	0.0334796	-0.0147603	S
GAGATGGAGGCGACAT-1_1_1_1_1_1_1	NT1	3299	1257	4.91058	Singlet	0.0282486	8	8	NT	T_cells	0.0863416	-0.014954	S
GAGATGGAGGTTATAG-1_1_1_1_1_1_1	NT1	3962	1381	4.74508	Singlet	0.0112994	0	0	NT	T_cells	0.0422552	0.00364638	S
GAGATGGCAGGCTCTG-1_1_1_1_1_1_1	NT1	6463	2150	4.96673	Singlet	0.358757	14	14	NT	CAFs	0.00204879	-0.0544002	S
GAGATGGGTGGTAATA-1_1_1_1_1_1_1	NT1	12413	524	0.0322243	Singlet	0.254237	10	10	NT	NK_cells	0.000570065	-0.0323617	S
GAGATGGTCGAGTCTA-1_1_1_1_1_1_1	NT1	1389	485	18.2145	Singlet	0.0706215	4	4	NT	Myeloid_cells	-0.02502	0.0229585	G2M
GAGCTGCCACTTCTCG-1_1_1_1_1_1_1	NT1	747	499	3.48059	Singlet	0.0423729	21	21	NT	Others	-0.0293864	-0.0827882	G1
GAGCTGCGTTCCGGTG-1_1_1_1_1_1_1	NT1	713	432	2.10379	Singlet	0	7	7	NT	Myeloid_cells	-0.0300525	-0.0137856	G1
GAGCTGCTCTCCATAT-1_1_1_1_1_1_1	NT1	3384	1404	5.85106	Singlet	0.0536723	8	8	NT	T_cells	0.0707736	-0.0237565	S
GAGGCAAAGACCCGCT-1_1_1_1_1_1_1	NT1	949	454	7.58693	Singlet	0.00564972	2	2	NT	Myeloid_cells	-0.0277633	-0.0241983	G1
GAGGCAAAGTGCAGGT-1_1_1_1_1_1_1	NT1	698	427	5.01433	Singlet	0.00564972	2	2	NT	Myeloid_cells	-0.0168182	-0.0122094	G1
GAGGCAAGTAGATGTA-1_1_1_1_1_1_1	NT1	3613	1322	5.67396	Singlet	0.0254237	8	8	NT	T_cells	0.109916	-0.0557623	S
GAGGCAATCGAACGGA-1_1_1_1_1_1_1	NT1	1209	645	1.57155	Singlet	0.0367232	7	7	NT	Myeloid_cells	-0.0388565	0.0867694	G2M
GAGGCAATCTACGCAA-1_1_1_1_1_1_1	NT1	5943	1824	7.03348	Singlet	0.367232	6	6	NT	Myeloid_cells	0.00934578	0.0403243	G2M
GAGGCCTCACCAACAT-1_1_1_1_1_1_1	NT1	838	443	5.96659	Singlet	0.0875706	4	4	NT	Myeloid_cells	-0.0272152	-0.0225378	G1
GAGGCCTCACGTAGTT-1_1_1_1_1_1_1	NT1	1420	632	4.92958	Singlet	0.118644	4	4	NT	Myeloid_cells	-0.0440598	-0.092489	G1
GAGGCCTGTCCCGCAA-1_1_1_1_1_1_1	NT1	3723	1128	6.47327	Singlet	0.186441	13	13	NT	B_cells	-0.00905398	-0.00760541	G1
GAGGCCTTCGTCTAAG-1_1_1_1_1_1_1	NT1	6115	1783	6.24693	Singlet	0.367232	6	6	NT	Myeloid_cells	0.0788893	-0.0456295	S
GAGGCCTTCTGCGGGT-1_1_1_1_1_1_1	NT1	1037	548	1.06075	Singlet	0.0225989	7	7	NT	Myeloid_cells	-0.0307323	-0.0335195	G1
GAGGGATAGTAAACAC-1_1_1_1_1_1_1	NT1	1442	693	7.07351	Singlet	0.0988701	1	1	NT	Ductal_cells	-0.029086	-0.00636429	G1
GAGGGATGTGCCGGTT-1_1_1_1_1_1_1	NT1	3354	1183	9.15325	Singlet	0.00564972	3	3	NT	T_cells	-0.0499018	0.0359916	G2M
GAGGGATTCATCGCCT-1_1_1_1_1_1_1	NT1	4288	1342	6.62313	Singlet	0.00282486	3	3	NT	T_cells	0.0256254	0.0445598	G2M
GAGGGTACACCGGAAA-1_1_1_1_1_1_1	NT1	4387	1342	3.41919	Singlet	0.0141243	3	3	NT	T_cells	0.0187997	0.0577666	G2M
GAGGGTAGTCAACCTA-1_1_1_1_1_1_1	NT1	3643	1366	7.27422	Singlet	0.0169492	3	3	NT	T_cells	-0.0162236	-0.0752871	G1
GAGGGTATCAGCTTGA-1_1_1_1_1_1_1	NT1	3609	306	0.055417	Singlet	0.251412	10	10	NT	NK_cells	-0.0157928	-0.0307265	G1
GAGGGTATCCAGCAAT-1_1_1_1_1_1_1	NT1	3200	1252	7.53125	Singlet	0.00847458	3	3	NT	T_cells	0.060682	0.0597691	S
GAGTCATCAAACACGG-1_1_1_1_1_1_1	NT1	3529	1607	3.82545	Singlet	0.367232	8	8	NT	T_cells	-0.0342619	0.0579269	G2M
GAGTCATGTGCATACT-1_1_1_1_1_1_1	NT1	6470	2207	4.34312	Singlet	0.310734	3	3	NT	T_cells	0.150451	0.00422636	S
GAGTCTAAGTATAGAC-1_1_1_1_1_1_1	NT1	6212	1842	7.17965	Singlet	0.364407	6	6	NT	Myeloid_cells	0.00779924	-0.0512514	S
GAGTCTAGTGGCAACA-1_1_1_1_1_1_1	NT1	3114	1240	7.73924	Singlet	0.00847458	3	3	NT	T_cells	-0.0409942	0.00950001	G2M
GAGTGAGGTCCGTACG-1_1_1_1_1_1_1	NT1	3529	1024	7.33919	Singlet	0.138418	13	13	NT	B_cells	-0.00358998	-0.00834984	G1
GAGTGAGGTGGTACAG-1_1_1_1_1_1_1	NT1	668	399	8.53293	Singlet	0.0141243	2	2	NT	Myeloid_cells	-0.0345506	-0.00586851	G1
GAGTGTTAGATTCGAA-1_1_1_1_1_1_1	NT1	4758	399	1.24002	Singlet	0.248588	10	10	NT	NK_cells	-0.0101835	-0.0350536	G1
GAGTGTTCAACCGCCA-1_1_1_1_1_1_1	NT1	2150	878	7.62791	Singlet	0.00564972	0	0	NT	T_cells	0.00674353	-0.0437579	S
GAGTGTTCAGATCCTA-1_1_1_1_1_1_1	NT1	4336	1377	7.95664	Singlet	0.0141243	3	3	NT	T_cells	-0.0211136	0.00876084	G2M
GAGTGTTGTTAGCGGA-1_1_1_1_1_1_1	NT1	705	511	3.12057	Singlet	0.0932203	1	1	NT	Ductal_cells	-0.0358468	-0.0263819	G1
GAGTTACCAGCCTACG-1_1_1_1_1_1_1	NT1	880	435	1.47727	Singlet	0	2	2	NT	Myeloid_cells	-0.0174456	-0.000200281	G1
GAGTTACTCTAGAACC-1_1_1_1_1_1_1	NT1	2550	954	5.64706	Singlet	0.172316	13	13	NT	B_cells	0.0418155	-0.0349772	S
GAGTTGTAGTTACGGG-1_1_1_1_1_1_1	NT1	1013	550	2.27048	Singlet	0.019774	7	7	NT	Myeloid_cells	-0.0151002	-0.0281535	G1
GAGTTGTCAACTGTGT-1_1_1_1_1_1_1	NT1	554	314	7.94224	Singlet	0.00282486	2	2	NT	Myeloid_cells	-0.0163425	0.0539197	G2M
GAGTTGTCACGAGGAT-1_1_1_1_1_1_1	NT1	6764	2148	2.7055	Singlet	0.324859	21	21	NT	Others	-0.0301432	-0.0296625	G1
GAGTTGTTCTCTCTTC-1_1_1_1_1_1_1	NT1	4078	1495	5.76263	Singlet	0.0508475	3	3	NT	T_cells	0.0368464	0.0032468	S
GAGTTTGCATTGGCAT-1_1_1_1_1_1_1	NT1	2815	1386	8.66785	Singlet	0.279661	20	20	NT	Ductal_cells	-0.0305831	-0.0679302	G1
GATAGAAAGTGAGGCT-1_1_1_1_1_1_1	NT1	3965	1409	9.43253	Singlet	0.353107	6	6	NT	Myeloid_cells	-0.0102102	-0.0641329	G1
GATAGCTTCCGGTAGC-1_1_1_1_1_1_1	NT1	976	609	5.32787	Singlet	0.132768	21	21	NT	Others	-0.0376221	-0.078435	G1
GATCACACAAGTATAG-1_1_1_1_1_1_1	NT1	3249	1242	4.27824	Singlet	0.0282486	3	3	NT	T_cells	0.06051	-0.0171578	S
GATCACACACATTCGA-1_1_1_1_1_1_1	NT1	2970	1293	5.75758	Singlet	0.0734463	17	17	NT	NK_cells	0.00899543	-0.0742559	S
GATCACATCACGATAC-1_1_1_1_1_1_1	NT1	4860	1833	3.29218	Singlet	0.237288	17	17	NT	NK_cells	0.111987	-0.0699689	S
GATCAGTCAGTAGAAT-1_1_1_1_1_1_1	NT1	815	535	2.20859	Singlet	0.0169492	7	7	NT	Myeloid_cells	-0.034664	-0.0373284	G1
GATCAGTGTACGGCAA-1_1_1_1_1_1_1	NT1	3586	1187	7.50139	Singlet	0.00564972	3	3	NT	T_cells	-0.0421958	-0.0510081	G1
GATCAGTGTCTGTGGC-1_1_1_1_1_1_1	NT1	511	389	3.91389	Singlet	0.0649718	1	1	NT	Ductal_cells	-0.0306334	-0.00449992	G1
GATCAGTGTGGCGTAA-1_1_1_1_1_1_1	NT1	3671	1361	7.00082	Singlet	0.0141243	3	3	NT	T_cells	-0.0137864	-0.0811975	G1
GATCATGAGAAACCAT-1_1_1_1_1_1_1	NT1	7577	2338	10.6375	Singlet	0.370056	14	14	NT	CAFs	-0.0128693	-0.0104002	G1
GATCATGAGACCTCCG-1_1_1_1_1_1_1	NT1	1031	465	26.6731	Singlet	0.00282486	2	2	NT	Myeloid_cells	-0.0208428	-0.013451	G1
GATCATGAGCGCCTCA-1_1_1_1_1_1_1	NT1	2947	1033	1.90024	Singlet	0.0903955	7	7	NT	Myeloid_cells	-0.0126764	0.0285984	G2M
GATCATGCACCCTGTT-1_1_1_1_1_1_1	NT1	4474	1621	4.64908	Singlet	0.0960452	17	17	NT	NK_cells	-0.00318939	0.0327329	G2M
GATCATGTCTCCGTGT-1_1_1_1_1_1_1	NT1	4849	1577	8.72345	Singlet	0.353107	6	6	NT	Myeloid_cells	-0.052311	-0.0656703	G1
GATCCCTCACAGTATC-1_1_1_1_1_1_1	NT1	1397	608	15.1754	Singlet	0.0762712	0	0	NT	T_cells	-0.0340139	0.0682693	G2M
GATCCCTGTGTGCTTA-1_1_1_1_1_1_1	NT1	3433	1234	6.8162	Singlet	0.0141243	3	3	NT	T_cells	-0.03901	-0.00975749	G1
GATCCCTTCCCTTCCC-1_1_1_1_1_1_1	NT1	4944	1727	3.09466	Singlet	0.350282	6	6	NT	Myeloid_cells	-0.0619766	-0.0585134	G1
GATCCCTTCGCCAGAC-1_1_1_1_1_1_1	NT1	3918	1421	5.33435	Singlet	0.110169	9	9	NT	NK_cells	0.0156876	-0.0595323	S
GATCGTAAGAAACTCA-1_1_1_1_1_1_1	NT1	1884	916	5.52017	Singlet	0.0649718	9	9	NT	NK_cells	0.00103494	-0.0859242	S
GATCGTAAGAACAAGG-1_1_1_1_1_1_1	NT1	906	526	4.74614	Singlet	0.0819209	4	4	NT	Myeloid_cells	-0.0229947	-0.0336525	G1
GATCGTAAGTCGAAGC-1_1_1_1_1_1_1	NT1	563	327	3.01954	Singlet	0.0423729	4	4	NT	Myeloid_cells	-0.017758	-0.0536917	G1
GATCGTAGTCAGGCAA-1_1_1_1_1_1_1	NT1	7259	2486	17.2751	Singlet	0.384181	14	14	NT	CAFs	-0.0320861	-0.0776599	G1
GATCGTAGTCTAACGT-1_1_1_1_1_1_1	NT1	5841	1727	4.34857	Singlet	0.059322	0	0	NT	T_cells	-0.00691447	0.0392231	G2M
GATGACTAGCCGTCGT-1_1_1_1_1_1_1	NT1	1046	572	1.43403	Singlet	0.0225989	2	2	NT	Myeloid_cells	-0.0265387	-0.0678314	G1
GATGACTCAGATCATC-1_1_1_1_1_1_1	NT1	828	465	2.89855	Singlet	0.0480226	1	1	NT	Ductal_cells	-0.015074	-0.0736675	G1
GATGAGGGTTATGACC-1_1_1_1_1_1_1	NT1	3421	1287	6.13856	Singlet	0.0112994	3	3	NT	T_cells	-0.0438573	-0.0183852	G1
GATGAGGTCAAGAGTA-1_1_1_1_1_1_1	NT1	5273	1769	4.4377	Singlet	0.367232	6	6	NT	Myeloid_cells	0.0372204	-0.0502877	S
GATGATCAGGTTCTTG-1_1_1_1_1_1_1	NT1	958	575	6.47182	Singlet	0.0819209	15	15	NT	B_cells	0.0126736	0.264566	G2M
GATGATCCAGCAATTC-1_1_1_1_1_1_1	NT1	1442	699	2.91262	Singlet	0.0536723	7	7	NT	Myeloid_cells	-0.0301264	0.00472261	G2M
GATGATCCAGGTATGG-1_1_1_1_1_1_1	NT1	1191	517	0.167926	Singlet	0.0649718	1	1	NT	Ductal_cells	0.021499	-0.0747173	S
GATGATCGTTACGTAC-1_1_1_1_1_1_1	NT1	3744	1352	3.6859	Singlet	0.0225989	3	3	NT	T_cells	0.056971	-0.042761	S
GATGATCTCGTAGTGT-1_1_1_1_1_1_1	NT1	3126	1322	3.51887	Singlet	0.0338983	8	8	NT	T_cells	-0.0162656	-0.0581779	G1
GATGCTAAGCCTCTTC-1_1_1_1_1_1_1	NT1	629	360	6.3593	Singlet	0.079096	4	4	NT	Myeloid_cells	-0.0321725	0.0121121	G2M
GATGCTACATATGGCT-1_1_1_1_1_1_1	NT1	5798	1950	7.34736	Singlet	0.364407	6	6	NT	Myeloid_cells	-0.0405677	0.0160553	G2M
GATGGAGCACCGTGGT-1_1_1_1_1_1_1	NT1	1152	557	3.90625	Singlet	0.0649718	1	1	NT	Ductal_cells	-0.0227739	0.00371309	G2M
GATGGAGGTTTAGAGA-1_1_1_1_1_1_1	NT1	1399	515	15.797	Singlet	0.0734463	6	6	NT	Myeloid_cells	-0.0178152	-0.0693515	G1
GATGTTGTCTTCTAAC-1_1_1_1_1_1_1	NT1	3080	1006	0.616883	Singlet	0.180791	24	24	NT	Others	-0.0490987	-0.0819352	G1
GATTCGACAGGTTCCG-1_1_1_1_1_1_1	NT1	681	378	10.279	Singlet	0.110169	11	11	NT	Ductal_cells	-0.0279507	-0.0439587	G1
GATTCTTAGTGTGTTC-1_1_1_1_1_1_1	NT1	748	459	3.47594	Singlet	0.0451977	18	18	NT	T_cells	-0.026273	-0.0609501	G1
GATTCTTGTACCCGAC-1_1_1_1_1_1_1	NT1	14247	1669	0.589598	Singlet	0.279661	10	10	NT	NK_cells	-0.0354253	-0.0219937	G1
GATTGGTAGACCTCCG-1_1_1_1_1_1_1	NT1	885	379	9.15254	Singlet	0.039548	1	1	NT	Ductal_cells	-0.0123699	-0.000798363	G1
GATTGGTTCATTTGTC-1_1_1_1_1_1_1	NT1	5161	1782	4.97966	Singlet	0.180791	3	3	NT	T_cells	-0.0585905	-0.0652423	G1
GCAACATGTACGGTTT-1_1_1_1_1_1_1	NT1	1160	630	2.41379	Singlet	0.0338983	2	2	NT	Myeloid_cells	-0.0289248	0.0349663	G2M
GCAACATGTTCAAACC-1_1_1_1_1_1_1	NT1	5255	2080	16.4225	Singlet	0.375706	22	22	NT	Ductal_cells	-0.0571324	-0.0934987	G1
GCAACATGTTCTTCAT-1_1_1_1_1_1_1	NT1	3846	1444	6.96828	Singlet	0.019774	3	3	NT	T_cells	0.0762441	-0.00721069	S
GCAACATTCGTTCATT-1_1_1_1_1_1_1	NT1	1456	644	5.08242	Singlet	0.0480226	7	7	NT	Myeloid_cells	-0.0274641	-0.0142016	G1
GCAACCGAGGCCGCTT-1_1_1_1_1_1_1	NT1	2764	1058	1.44718	Singlet	0.0734463	7	7	NT	Myeloid_cells	-0.0492669	-0.0494506	G1
GCAACCGGTATCAGCT-1_1_1_1_1_1_1	NT1	3065	1218	8.67863	Singlet	0.347458	6	6	NT	Myeloid_cells	-0.0163202	-0.0327137	G1
GCAACCGGTCGCGTTG-1_1_1_1_1_1_1	NT1	3654	1318	3.96825	Singlet	0.20904	13	13	NT	B_cells	-0.0226906	-0.0319857	G1
GCAACCGTCAGCTTCC-1_1_1_1_1_1_1	NT1	3751	1490	3.09251	Singlet	0.124294	8	8	NT	T_cells	0.0857688	-0.0309943	S
GCAACCGTCATCCTAT-1_1_1_1_1_1_1	NT1	8343	392	0.0599305	Singlet	0.242938	10	10	NT	NK_cells	-0.0118238	-0.0285546	G1
GCAACCGTCGTCAGAT-1_1_1_1_1_1_1	NT1	1469	719	0.816882	Singlet	0.0988701	19	19	NT	Myeloid_cells	-0.025217	-0.0858316	G1
GCACATAGTCGTACTA-1_1_1_1_1_1_1	NT1	577	375	5.026	Singlet	0	2	2	NT	Myeloid_cells	-0.0334881	0.00167416	G2M
GCACATAGTCTATGAC-1_1_1_1_1_1_1	NT1	4063	1748	3.9872	Singlet	0.350282	21	21	NT	Others	-0.0503833	-0.0282738	G1
GCACGGTCAGCTACTA-1_1_1_1_1_1_1	NT1	1020	552	2.45098	Singlet	0.0141243	2	2	NT	Myeloid_cells	-0.0253261	-0.0279418	G1
GCACGGTTCTGAGAAA-1_1_1_1_1_1_1	NT1	793	455	3.657	Singlet	0	2	2	NT	Myeloid_cells	-0.0217204	-0.0154546	G1
GCACGTGAGAGCCATG-1_1_1_1_1_1_1	NT1	1238	575	13.0048	Singlet	0.0141243	3	3	NT	T_cells	-0.0339773	-0.0376139	G1
GCACGTGAGTGTTCAC-1_1_1_1_1_1_1	NT1	1516	865	11.6095	Singlet	0.180791	20	20	NT	Ductal_cells	-0.0569901	-0.062187	G1
GCACGTGCAGATCCTA-1_1_1_1_1_1_1	NT1	602	335	5.81395	Singlet	0.0536723	4	4	NT	Myeloid_cells	-0.0141394	0.00614185	G2M
GCACGTGTCGAGAATA-1_1_1_1_1_1_1	NT1	4443	1480	5.35674	Singlet	0.0254237	3	3	NT	T_cells	-0.0176633	-0.0385581	G1
GCACGTGTCTACCCAC-1_1_1_1_1_1_1	NT1	7460	475	0.0402145	Singlet	0.248588	10	10	NT	NK_cells	-0.0134754	-0.0393534	G1
GCACTAAAGTTGTACC-1_1_1_1_1_1_1	NT1	6580	368	0.0455927	Singlet	0.240113	10	10	NT	NK_cells	-0.0111862	-0.0103382	G1
GCACTAACACACCGAC-1_1_1_1_1_1_1	NT1	1124	608	1.06762	Singlet	0.0564972	7	7	NT	Myeloid_cells	-0.0368888	-0.0415904	G1
GCAGCCAGTATGGAAT-1_1_1_1_1_1_1	NT1	5437	1755	3.69689	Singlet	0.135593	9	9	NT	NK_cells	0.00373442	-0.00875019	S
GCAGCCAGTTGGCCTG-1_1_1_1_1_1_1	NT1	3812	1357	7.34523	Singlet	0.353107	6	6	NT	Myeloid_cells	0.050484	-0.0736179	S
GCAGCCATCCATACAG-1_1_1_1_1_1_1	NT1	4498	1481	3.95731	Singlet	0.0141243	8	8	NT	T_cells	-0.0194404	-0.0291162	G1
GCAGCTGAGCATGGGT-1_1_1_1_1_1_1	NT1	1768	773	7.35294	Singlet	0.0141243	8	8	NT	T_cells	0.00864512	-0.0824227	S
GCAGCTGTCCCTCTAG-1_1_1_1_1_1_1	NT1	966	453	6.62526	Singlet	0.0508475	1	1	NT	Ductal_cells	-0.0164068	-0.0743619	G1
GCAGCTGTCTCTGGTC-1_1_1_1_1_1_1	NT1	3151	1327	5.04602	Singlet	0.0254237	8	8	NT	T_cells	0.0171522	-0.00609013	S
GCAGGCTAGTAAGAGG-1_1_1_1_1_1_1	NT1	2934	1457	8.99796	Singlet	0.319209	20	20	NT	Ductal_cells	-0.0263045	0.513236	G2M
GCAGGCTAGTCCTACA-1_1_1_1_1_1_1	NT1	1557	774	4.56005	Singlet	0.135593	4	4	NT	Myeloid_cells	0.013954	-0.00261708	S
GCAGGCTCAAATCGTC-1_1_1_1_1_1_1	NT1	696	380	1.58046	Singlet	0.00282486	2	2	NT	Myeloid_cells	0.0468851	-0.00409331	S
GCAGGCTGTCTAGATC-1_1_1_1_1_1_1	NT1	879	416	20.5916	Singlet	0.0338983	1	1	NT	Ductal_cells	0.0450407	-0.0515601	S
GCAGGCTTCATGGATC-1_1_1_1_1_1_1	NT1	3924	1380	7.54332	Singlet	0.0112994	3	3	NT	T_cells	0.00280606	-0.0143537	S
GCAGGCTTCTAACACG-1_1_1_1_1_1_1	NT1	8081	1898	4.92513	Singlet	0.0536723	0	0	NT	T_cells	-0.0119079	0.0670989	G2M
GCAGTTAAGACTCAAA-1_1_1_1_1_1_1	NT1	3346	1304	6.30604	Singlet	0.0254237	3	3	NT	T_cells	0.0568587	-0.011903	S
GCAGTTAAGTCGAAGC-1_1_1_1_1_1_1	NT1	7432	1813	3.55221	Singlet	0.282486	14	14	NT	CAFs	-0.0561965	-0.111125	G1
GCAGTTAGTCAAAGTA-1_1_1_1_1_1_1	NT1	568	304	3.16901	Singlet	0.00847458	2	2	NT	Myeloid_cells	-0.0108076	-0.0437777	G1
GCAGTTAGTCCATAGT-1_1_1_1_1_1_1	NT1	1185	629	3.29114	Singlet	0.019774	7	7	NT	Myeloid_cells	-0.03837	0.0595347	G2M
GCATCGGCAATAGGAT-1_1_1_1_1_1_1	NT1	3949	1324	8.48316	Singlet	0.330508	6	6	NT	Myeloid_cells	0.0290782	-0.00793554	S
GCATCGGTCTTAATCC-1_1_1_1_1_1_1	NT1	4931	1564	8.98398	Singlet	0.0734463	0	0	NT	T_cells	-0.00578106	-0.0139062	G1
GCATCTCCACACAGAG-1_1_1_1_1_1_1	NT1	7550	622	0.768212	Singlet	0.268362	10	10	NT	NK_cells	0.012734	-0.0415573	S
GCATCTCTCTTTCAGT-1_1_1_1_1_1_1	NT1	3340	1166	14.1018	Singlet	0.240113	4	4	NT	Myeloid_cells	-0.0235735	-0.0685688	G1
GCATGATAGCTCGCAC-1_1_1_1_1_1_1	NT1	550	313	3.09091	Singlet	0.0480226	4	4	NT	Myeloid_cells	-0.0131512	0.00577445	G2M
GCATGATAGGCACCAA-1_1_1_1_1_1_1	NT1	4076	1422	9.12659	Singlet	0.019774	3	3	NT	T_cells	0.0611485	-0.00634256	S
GCATGATCACATAGCT-1_1_1_1_1_1_1	NT1	950	522	3.78947	Singlet	0.0169492	2	2	NT	Myeloid_cells	-0.0324306	0.112229	G2M
GCATTAGAGGAGTACC-1_1_1_1_1_1_1	NT1	36428	1595	0.0109806	Singlet	0.274011	10	10	NT	NK_cells	-0.00952952	-0.0334619	G1
GCATTAGCAGCAGACA-1_1_1_1_1_1_1	NT1	4621	1284	8.69942	Singlet	0.19774	13	13	NT	B_cells	0.0822851	-0.0323153	S
GCATTAGGTACGATTC-1_1_1_1_1_1_1	NT1	1104	628	2.08333	Singlet	0.0225989	7	7	NT	Myeloid_cells	0.0215174	6.91572e-05	S
GCATTAGGTGATCGTT-1_1_1_1_1_1_1	NT1	4977	1724	5.66606	Singlet	0.364407	6	6	NT	Myeloid_cells	-0.0592274	-0.0789967	G1
GCATTAGTCTTTCCGG-1_1_1_1_1_1_1	NT1	700	389	1.71429	Singlet	0.00282486	2	2	NT	Myeloid_cells	-0.0226654	-0.0618387	G1
GCCAACGCACATTCGA-1_1_1_1_1_1_1	NT1	941	579	11.5834	Singlet	0.127119	20	20	NT	Ductal_cells	-0.0401016	-0.0333934	G1
GCCAGCAGTCGTCATA-1_1_1_1_1_1_1	NT1	3205	1158	5.95944	Singlet	0.0141243	8	8	NT	T_cells	-0.0497181	-0.0287938	G1
GCCAGCAGTGTGGACA-1_1_1_1_1_1_1	NT1	3860	1371	8.52332	Singlet	0.0254237	3	3	NT	T_cells	0.0690693	-0.0516537	S
GCCAGCATCGCAAGAG-1_1_1_1_1_1_1	NT1	1114	716	4.66786	Singlet	0.107345	21	21	NT	Others	-0.0380355	-0.0512948	G1
GCCAGCATCTTACGGA-1_1_1_1_1_1_1	NT1	4540	1672	6.65198	Singlet	0.163842	3	3	NT	T_cells	-0.0612887	0.0214544	G2M
GCCAGGTAGCCTGGAA-1_1_1_1_1_1_1	NT1	3871	1471	3.95247	Singlet	0.0480226	8	8	NT	T_cells	0.00485396	-0.0327499	S
GCCAGGTCAGAGCGTA-1_1_1_1_1_1_1	NT1	1146	553	15.0087	Singlet	0.0112994	2	2	NT	Myeloid_cells	-0.0186154	0.0541661	G2M
GCCAGGTGTTTCGCTC-1_1_1_1_1_1_1	NT1	630	439	6.66667	Singlet	0.0734463	1	1	NT	Ductal_cells	0.0323399	-0.065832	S
GCCAGTGAGAGCCGTA-1_1_1_1_1_1_1	NT1	3122	1418	8.36003	Singlet	0.180791	9	9	NT	NK_cells	0.0503128	-0.0561172	S
GCCAGTGGTGCCCTTT-1_1_1_1_1_1_1	NT1	4163	1517	8.31131	Singlet	0.0536723	3	3	NT	T_cells	0.0486157	-0.0247144	S
GCCAGTGTCAGAATAG-1_1_1_1_1_1_1	NT1	691	485	1.73661	Singlet	0.0649718	1	1	NT	Ductal_cells	-0.0307841	-0.0150601	G1
GCCAGTGTCTCCAATT-1_1_1_1_1_1_1	NT1	1024	526	23.4375	Singlet	0.0508475	9	9	NT	NK_cells	-0.0391039	-0.0634865	G1
GCCATGGCATCGAGCC-1_1_1_1_1_1_1	NT1	666	458	3.9039	Singlet	0.059322	1	1	NT	Ductal_cells	0.0522493	-0.00131369	S
GCCATGGCATTGGCAT-1_1_1_1_1_1_1	NT1	7387	2424	8.5285	Singlet	0.389831	14	14	NT	CAFs	-0.0591389	-0.0657673	G1
GCCATGGTCATCAGTG-1_1_1_1_1_1_1	NT1	4561	1502	4.77965	Singlet	0.0423729	3	3	NT	T_cells	0.0276994	-0.00465789	S
GCCATTCCAATAACCC-1_1_1_1_1_1_1	NT1	1280	635	7.34375	Singlet	0.0819209	4	4	NT	Myeloid_cells	0.0710417	-0.0348558	S
GCCATTCTCAGTGTGT-1_1_1_1_1_1_1	NT1	2032	907	5.41339	Singlet	0.324859	6	6	NT	Myeloid_cells	-0.0047516	0.0369428	G2M
GCCCAGACACATGACT-1_1_1_1_1_1_1	NT1	2745	1128	6.15665	Singlet	0.0254237	3	3	NT	T_cells	-0.0421055	-0.038148	G1
GCCCGAAAGATCCGAG-1_1_1_1_1_1_1	NT1	7342	2163	1.56633	Singlet	0.367232	4	4	NT	Myeloid_cells	-0.0289822	-0.0719537	G1
GCCCGAAGTCATCAGT-1_1_1_1_1_1_1	NT1	658	346	5.77508	Singlet	0	2	2	NT	Myeloid_cells	-0.00898712	-0.0022629	G1
GCCGATGAGACCAAGC-1_1_1_1_1_1_1	NT1	1389	790	2.08783	Singlet	0.132768	21	21	NT	Others	0.0102573	-0.117677	S
GCCGATGAGGGATCAC-1_1_1_1_1_1_1	NT1	621	337	1.61031	Singlet	0.0451977	4	4	NT	Myeloid_cells	-0.0148127	0.0146885	G2M
GCCGATGCACAAAGCG-1_1_1_1_1_1_1	NT1	8563	2301	7.03025	Singlet	0.338983	14	14	NT	CAFs	-0.0744131	-0.020337	G1
GCCGATGGTCGGCACT-1_1_1_1_1_1_1	NT1	6012	1675	5.37259	Singlet	0.353107	6	6	NT	Myeloid_cells	0.00349373	-0.0727743	S
GCCGATGGTGCGAACA-1_1_1_1_1_1_1	NT1	4759	1555	5.50536	Singlet	0.350282	6	6	NT	Myeloid_cells	0.0790859	-0.00896335	S
GCCGTGAAGTTAGTAG-1_1_1_1_1_1_1	NT1	30384	1073	0.00987362	Singlet	0.262712	10	10	NT	NK_cells	-0.0145313	-0.0344452	G1
GCCGTGATCTAGCATG-1_1_1_1_1_1_1	NT1	5525	1810	7.9095	Singlet	0.344633	14	14	NT	CAFs	0.0291309	-0.0343068	S
GCCTGTTTCCCTAGGG-1_1_1_1_1_1_1	NT1	969	560	3.61197	Singlet	0.0169492	7	7	NT	Myeloid_cells	-0.0310999	-0.0708753	G1
GCGAGAAAGTATGAAC-1_1_1_1_1_1_1	NT1	4200	1593	3.21429	Singlet	0.20904	9	9	NT	NK_cells	-0.0263553	-0.0285985	G1
GCGAGAAAGTCTACCA-1_1_1_1_1_1_1	NT1	4367	1622	7.0758	Singlet	0.330508	4	4	NT	Myeloid_cells	-0.0268883	-0.00829044	G1
GCGAGAAAGTGAGTTA-1_1_1_1_1_1_1	NT1	5198	1726	5.13659	Singlet	0.370056	6	6	NT	Myeloid_cells	-0.000365432	-0.0401387	G1
GCGAGAAGTCAGGTAG-1_1_1_1_1_1_1	NT1	5268	1700	5.44799	Singlet	0.358757	6	6	NT	Myeloid_cells	-0.0262252	-0.0359483	G1
GCGAGAATCGATTCCC-1_1_1_1_1_1_1	NT1	2269	1038	7.93301	Singlet	0.0988701	11	11	NT	Ductal_cells	0.0245668	-0.0471945	S
GCGATCGAGTTGGCTT-1_1_1_1_1_1_1	NT1	4760	1575	7.66807	Singlet	0.0480226	3	3	NT	T_cells	-0.0174253	0.0214815	G2M
GCGATCGCATCAGCAT-1_1_1_1_1_1_1	NT1	3293	1388	13.0884	Singlet	0.324859	14	14	NT	CAFs	-0.0358508	-0.0876943	G1
GCGATCGGTACGACAG-1_1_1_1_1_1_1	NT1	9357	2331	3.58021	Singlet	0.344633	4	4	NT	Myeloid_cells	-0.0410019	-0.0573962	G1
GCGATCGTCGTGGAAG-1_1_1_1_1_1_1	NT1	947	540	3.0623	Singlet	0.059322	4	4	NT	Myeloid_cells	0.0358602	-0.0362133	S
GCGGAAATCCGCCTAT-1_1_1_1_1_1_1	NT1	4754	1543	7.93016	Singlet	0.344633	6	6	NT	Myeloid_cells	-0.00624337	-0.0671665	G1
GCGGATCAGAGCCCAA-1_1_1_1_1_1_1	NT1	4678	1515	8.67892	Singlet	0.234463	13	13	NT	B_cells	0.00826296	-0.112973	S
GCGGATCGTGCGGCTT-1_1_1_1_1_1_1	NT1	4102	1426	10.8484	Singlet	0.200565	9	9	NT	NK_cells	-0.00175854	-0.0175983	G1
GCGGATCTCCATTTCA-1_1_1_1_1_1_1	NT1	7935	2431	10.7246	Singlet	0.381356	14	14	NT	CAFs	0.046394	-0.07869	S
GCGTGCACACTTGGCG-1_1_1_1_1_1_1	NT1	1458	778	2.19479	Singlet	0.110169	21	21	NT	Others	0.00960753	-0.0482083	S
GCGTGCACAGTGTGGA-1_1_1_1_1_1_1	NT1	808	468	1.11386	Singlet	0	2	2	NT	Myeloid_cells	0.0360738	0.0448332	G2M
GCGTGCAGTAGTTAGA-1_1_1_1_1_1_1	NT1	897	502	2.22965	Singlet	0.00847458	7	7	NT	Myeloid_cells	-0.0261566	-0.0710234	G1
GCGTGCAGTTAAGGAT-1_1_1_1_1_1_1	NT1	594	355	2.18855	Singlet	0	2	2	NT	Myeloid_cells	-0.0181616	-0.0633566	G1
GCGTGCAGTTAGGGAC-1_1_1_1_1_1_1	NT1	7043	2171	7.24123	Singlet	0.293785	4	4	NT	Myeloid_cells	0.0540867	-0.0967488	S
GCGTTTCTCCGTGACG-1_1_1_1_1_1_1	NT1	837	484	0.358423	Singlet	0	2	2	NT	Myeloid_cells	-0.0288046	-0.00320194	G1
GCTACAAGTCCTGGGT-1_1_1_1_1_1_1	NT1	606	364	1.48515	Singlet	0.0480226	4	4	NT	Myeloid_cells	0.0605667	-0.0654418	S
GCTACAATCCGTAATG-1_1_1_1_1_1_1	NT1	1854	881	5.39374	Singlet	0.161017	20	20	NT	Ductal_cells	0.0372387	0.548486	G2M
GCTACCTGTTAAGGAT-1_1_1_1_1_1_1	NT1	2310	1182	0.47619	Singlet	0.288136	22	22	NT	Ductal_cells	-0.025817	-0.00611628	G1
GCTACCTTCATGCGGC-1_1_1_1_1_1_1	NT1	998	450	4.20842	Singlet	0.0706215	1	1	NT	Ductal_cells	-0.0310067	-0.0250121	G1
GCTCAAACAGTGAGCA-1_1_1_1_1_1_1	NT1	3425	1353	5.83942	Singlet	0.0141243	3	3	NT	T_cells	-0.0113943	0.05966	G2M
GCTCAAACATGGACAG-1_1_1_1_1_1_1	NT1	3198	1283	6.8793	Singlet	0.135593	0	0	NT	T_cells	-0.0548019	-0.0435669	G1
GCTCAAAGTATCCTCC-1_1_1_1_1_1_1	NT1	3111	1216	5.17518	Singlet	0.0112994	8	8	NT	T_cells	-0.00513126	0.0203986	G2M
GCTGAATAGAGCCGTA-1_1_1_1_1_1_1	NT1	10573	2246	2.30777	Singlet	0.310734	4	4	NT	Myeloid_cells	-0.00601813	-0.0347268	G1
GCTGAATAGGTCATCT-1_1_1_1_1_1_1	NT1	7396	2428	7.8556	Singlet	0.389831	14	14	NT	CAFs	-0.0644834	-0.0676359	G1
GCTGAATCAGGATGAC-1_1_1_1_1_1_1	NT1	30778	1072	0.17545	Singlet	0.262712	10	10	NT	NK_cells	-0.00777724	-0.0339208	G1
GCTGAATGTTAGAAAC-1_1_1_1_1_1_1	NT1	891	470	2.6936	Singlet	0	2	2	NT	Myeloid_cells	-0.0250801	-0.0233715	G1
GCTGAATTCAGCTGTA-1_1_1_1_1_1_1	NT1	2155	1071	7.5174	Singlet	0.214689	21	21	NT	Others	0.0527917	-0.079657	S
GCTGCAGCAAACGGCA-1_1_1_1_1_1_1	NT1	502	357	13.745	Singlet	0.0564972	1	1	NT	Ductal_cells	-0.0299763	-0.0575758	G1
GCTGCAGTCGATCCCT-1_1_1_1_1_1_1	NT1	5391	1680	7.36413	Singlet	0.231638	13	13	NT	B_cells	0.0928986	0.0351534	S
GCTGGGTGTGTTCATG-1_1_1_1_1_1_1	NT1	1431	622	5.38085	Singlet	0.121469	4	4	NT	Myeloid_cells	0.0259553	-0.0685383	S
GCTGGGTTCGTTCCTG-1_1_1_1_1_1_1	NT1	2233	1094	3.09001	Singlet	0.0480226	17	17	NT	NK_cells	0.0346825	-0.0643656	S
GCTGGGTTCTTAGCAG-1_1_1_1_1_1_1	NT1	984	520	0	Singlet	0.0508475	4	4	NT	Myeloid_cells	-0.0221135	-0.0639245	G1
GCTTCACAGAGAATCT-1_1_1_1_1_1_1	NT1	3604	1391	7.35294	Singlet	0.0254237	0	0	NT	T_cells	0.0169096	-0.00688783	S
GCTTCACCACCTCTAC-1_1_1_1_1_1_1	NT1	4663	1624	6.04761	Singlet	0.110169	3	3	NT	T_cells	0.00426711	0.00517949	G2M
GCTTCACCACTTCATT-1_1_1_1_1_1_1	NT1	1557	637	17.7906	Singlet	0.0141243	4	4	NT	Myeloid_cells	0.0168489	-0.0342668	S
GCTTCACCAGTCTACA-1_1_1_1_1_1_1	NT1	1528	796	0.78534	Singlet	0.0734463	7	7	NT	Myeloid_cells	-0.0386723	0.0508439	G2M
GCTTGGGAGATGGTCG-1_1_1_1_1_1_1	NT1	4406	1436	11.7113	Singlet	0.353107	6	6	NT	Myeloid_cells	-0.0249457	-0.0350011	G1
GCTTGGGCAACGACAG-1_1_1_1_1_1_1	NT1	12698	1752	3.01622	Singlet	0.310734	10	10	NT	NK_cells	-0.0252696	-0.0586732	G1
GCTTGGGTCCCACAGG-1_1_1_1_1_1_1	NT1	6394	1805	7.30372	Singlet	0.364407	6	6	NT	Myeloid_cells	-0.00918827	-0.0578833	G1
GCTTTCGAGGCTAGCA-1_1_1_1_1_1_1	NT1	4189	1567	5.70542	Singlet	0.228814	9	9	NT	NK_cells	-0.0292827	-0.0177874	G1
GCTTTCGAGTTCACTG-1_1_1_1_1_1_1	NT1	1133	486	1.05914	Singlet	0	2	2	NT	Myeloid_cells	-0.0243294	-0.00987341	G1
GCTTTCGGTTCAGGTT-1_1_1_1_1_1_1	NT1	3124	1250	4.09731	Singlet	0.0169492	3	3	NT	T_cells	-0.00742707	-0.0422308	G1
GGAACCCTCTCGTCGT-1_1_1_1_1_1_1	NT1	799	504	3.75469	Singlet	0.0480226	24	24	NT	Others	-0.024469	-0.0738772	G1
GGAAGTGCAATACAGA-1_1_1_1_1_1_1	NT1	572	375	4.1958	Singlet	0	2	2	NT	Myeloid_cells	0.0495573	0.113722	G2M
GGAAGTGTCTCCAATT-1_1_1_1_1_1_1	NT1	591	356	5.75296	Singlet	0.0367232	19	19	NT	Myeloid_cells	-0.0213378	-0.0629719	G1
GGAATCTAGCGATGAC-1_1_1_1_1_1_1	NT1	512	324	6.44531	Singlet	0.0536723	4	4	NT	Myeloid_cells	-0.0119955	-0.0523736	G1
GGAATCTCAACAGCCC-1_1_1_1_1_1_1	NT1	4763	1520	5.87865	Singlet	0.355932	6	6	NT	Myeloid_cells	-0.0531759	-0.0325212	G1
GGAATCTCAGCAGATG-1_1_1_1_1_1_1	NT1	1264	613	7.04114	Singlet	0.00564972	7	7	NT	Myeloid_cells	-0.039475	0.0723594	G2M
GGAATCTGTCTGCCTT-1_1_1_1_1_1_1	NT1	992	506	2.92339	Singlet	0.0819209	1	1	NT	Ductal_cells	-0.0207473	-0.062381	G1
GGAATGGAGTCCCAGC-1_1_1_1_1_1_1	NT1	828	527	5.7971	Singlet	0.0564972	14	14	NT	CAFs	-0.0277346	-0.0692791	G1
GGAATGGCACTACTTT-1_1_1_1_1_1_1	NT1	3665	1612	6.93042	Singlet	0.313559	14	14	NT	CAFs	-0.0489619	-0.0707078	G1
GGAATGGGTCGGTGTC-1_1_1_1_1_1_1	NT1	4008	1681	4.66567	Singlet	0.319209	21	21	NT	Others	0.0156904	-0.0161498	S
GGAATGGGTCTACGTA-1_1_1_1_1_1_1	NT1	2644	1123	4.76551	Singlet	0.019774	8	8	NT	T_cells	0.0372763	-0.0429541	S
GGAATGGTCCGATGCG-1_1_1_1_1_1_1	NT1	1635	926	0.856269	Singlet	0.20904	22	22	NT	Ductal_cells	0.0935954	-0.0850605	S
GGACGTCAGCACTTTG-1_1_1_1_1_1_1	NT1	1037	466	15.0434	Singlet	0.0649718	0	0	NT	T_cells	-0.0313946	-0.0151308	G1
GGACGTCGTCAAGCGA-1_1_1_1_1_1_1	NT1	7969	1678	7.55427	Singlet	0.0423729	0	0	NT	T_cells	0.0164546	-0.0668632	S
GGACGTCGTCCATAGT-1_1_1_1_1_1_1	NT1	4043	1362	9.25056	Singlet	0.0282486	3	3	NT	T_cells	-0.0181959	-0.0225208	G1
GGACGTCGTCTCTCCA-1_1_1_1_1_1_1	NT1	3345	1230	6.72646	Singlet	0.0141243	3	3	NT	T_cells	-0.00518749	0.0928855	G2M
GGACGTCGTTTACGAC-1_1_1_1_1_1_1	NT1	31841	1377	0.0785151	Singlet	0.271186	10	10	NT	NK_cells	-0.0204819	-0.0366704	G1
GGACGTCTCCAGTACA-1_1_1_1_1_1_1	NT1	5542	2184	4.87189	Singlet	0.367232	21	21	NT	Others	-0.000583377	-0.0852819	G1
GGACGTCTCTCTGAGA-1_1_1_1_1_1_1	NT1	3740	1313	8.34225	Singlet	0.0169492	3	3	NT	T_cells	0.0572071	0.00719433	S
GGAGATGGTCTCAGGC-1_1_1_1_1_1_1	NT1	1813	870	2.04082	Singlet	0.079096	7	7	NT	Myeloid_cells	-0.036556	0.0675098	G2M
GGAGCAAAGGGTTAGC-1_1_1_1_1_1_1	NT1	4069	1418	6.34062	Singlet	0.0141243	3	3	NT	T_cells	-0.0113188	-0.00471324	G1
GGAGCAACAACCGACC-1_1_1_1_1_1_1	NT1	11311	860	0.18566	Singlet	0.271186	10	10	NT	NK_cells	-0.01886	-0.0408533	G1
GGAGCAACACTACCCT-1_1_1_1_1_1_1	NT1	5755	1924	4.58732	Singlet	0.200565	3	3	NT	T_cells	0.0776904	-0.0419486	S
GGAGCAACATCATCTT-1_1_1_1_1_1_1	NT1	4238	1473	6.89004	Singlet	0.0282486	3	3	NT	T_cells	0.0111662	0.0362692	G2M
GGAGCAAGTTCAATCG-1_1_1_1_1_1_1	NT1	3559	1211	0.140489	Singlet	0.220339	24	24	NT	Others	-0.0520488	-0.0824886	G1
GGAGGATCAATTGCTG-1_1_1_1_1_1_1	NT1	1359	694	14.8639	Singlet	0.129944	1	1	NT	Ductal_cells	-0.0546637	0.0231766	G2M
GGAGGATGTCTACACA-1_1_1_1_1_1_1	NT1	2432	1101	4.72862	Singlet	0.20904	4	4	NT	Myeloid_cells	0.0350037	-0.0487636	S
GGAGGATGTGGGTATG-1_1_1_1_1_1_1	NT1	1190	648	0.92437	Singlet	0.0564972	7	7	NT	Myeloid_cells	-0.0325456	0.0707811	G2M
GGAGGATGTTACACTG-1_1_1_1_1_1_1	NT1	742	449	4.31267	Singlet	0	2	2	NT	Myeloid_cells	-0.0279936	0.0298276	G2M
GGAGGATTCCGTTTCG-1_1_1_1_1_1_1	NT1	952	432	2.94118	Singlet	0.0819209	4	4	NT	Myeloid_cells	0.044866	-0.0589839	S
GGAGGTATCACGAGGA-1_1_1_1_1_1_1	NT1	1283	640	8.33983	Singlet	0.231638	11	11	NT	Ductal_cells	0.0169551	-0.00325999	S
GGATCTAAGCTCCGAC-1_1_1_1_1_1_1	NT1	1000	466	2.2	Singlet	0.019774	2	2	NT	Myeloid_cells	-0.0264601	-0.0361687	G1
GGATGTTCAGAAATTG-1_1_1_1_1_1_1	NT1	2972	1417	8.3109	Singlet	0.341808	4	4	NT	Myeloid_cells	-0.0663427	-0.0282088	G1
GGATGTTCATCCGTGG-1_1_1_1_1_1_1	NT1	5431	1505	3.53526	Singlet	0.0169492	0	0	NT	T_cells	0.00175696	-0.00420791	S
GGATGTTGTCTGTGTA-1_1_1_1_1_1_1	NT1	4059	1540	4.18822	Singlet	0.0847458	8	8	NT	T_cells	0.0402342	0.0169164	S
GGCACGTGTGTCTCCT-1_1_1_1_1_1_1	NT1	3766	1484	7.22252	Singlet	0.347458	6	6	NT	Myeloid_cells	-0.00674058	-0.0426962	G1
GGCACGTGTTCTAACG-1_1_1_1_1_1_1	NT1	11333	516	0.00882379	Singlet	0.257062	10	10	NT	NK_cells	-0.0109074	-0.00636104	G1
GGCACGTTCAGTCCGG-1_1_1_1_1_1_1	NT1	2710	1245	5.38745	Singlet	0.10452	17	17	NT	NK_cells	0.00924833	-0.0243863	S
GGCACGTTCCATGCAA-1_1_1_1_1_1_1	NT1	672	420	1.78571	Singlet	0	2	2	NT	Myeloid_cells	-0.0272594	0.0402724	G2M
GGCAGTCAGTGATAGT-1_1_1_1_1_1_1	NT1	2875	1140	5.70435	Singlet	0.00282486	3	3	NT	T_cells	-0.0478271	-0.00937386	G1
GGCAGTCCAAATAAGC-1_1_1_1_1_1_1	NT1	3874	1387	8.80227	Singlet	0.0564972	3	3	NT	T_cells	-0.0166298	0.0294649	G2M
GGCAGTCGTGCCGGTT-1_1_1_1_1_1_1	NT1	3831	1288	6.18637	Singlet	0.0141243	3	3	NT	T_cells	-0.012751	0.0122779	G2M
GGCAGTCTCAAGTGGG-1_1_1_1_1_1_1	NT1	3553	1303	6.58598	Singlet	0.0112994	3	3	NT	T_cells	0.0468837	0.017773	S
GGCAGTCTCATAGCAC-1_1_1_1_1_1_1	NT1	1449	733	2.96756	Singlet	0.079096	7	7	NT	Myeloid_cells	-0.0416509	0.00962464	G2M
GGCGTCAAGCCGGAAT-1_1_1_1_1_1_1	NT1	3947	1355	8.25944	Singlet	0.00847458	3	3	NT	T_cells	-0.00982926	0.0227853	G2M
GGCGTCACAGACCAGA-1_1_1_1_1_1_1	NT1	730	332	21.3699	Singlet	0.0508475	4	4	NT	Myeloid_cells	-0.0285584	-0.0366223	G1
GGCTGTGAGTGTGTTC-1_1_1_1_1_1_1	NT1	2863	1042	3.77227	Singlet	0.155367	4	4	NT	Myeloid_cells	-0.00225151	-0.0305139	G1
GGCTGTGCACCGGCTA-1_1_1_1_1_1_1	NT1	3103	1174	3.15823	Singlet	0.0112994	8	8	NT	T_cells	0.0306867	0.199014	G2M
GGCTGTGGTCCTTTGC-1_1_1_1_1_1_1	NT1	7186	2418	8.76705	Singlet	0.387006	14	14	NT	CAFs	-0.000948709	-0.0727433	G1
GGCTGTGTCCATTCGC-1_1_1_1_1_1_1	NT1	800	442	3.625	Singlet	0.00282486	7	7	NT	Myeloid_cells	-0.0132329	-0.0203672	G1
GGCTTGGGTGTTCCTC-1_1_1_1_1_1_1	NT1	3792	1491	7.06751	Singlet	0.0706215	3	3	NT	T_cells	0.107178	-0.0180445	S
GGCTTGGTCACTTGTT-1_1_1_1_1_1_1	NT1	3632	1433	5.64427	Singlet	0.0988701	0	0	NT	T_cells	0.0123376	-0.0699551	S
GGCTTTCAGCATAGGC-1_1_1_1_1_1_1	NT1	4570	1674	5.186	Singlet	0.175141	3	3	NT	T_cells	0.0349911	-0.0293866	S
GGCTTTCAGCGCCCAT-1_1_1_1_1_1_1	NT1	822	388	9.48905	Singlet	0.0141243	16	16	NT	Myeloid_cells	-0.0321666	-0.0108041	G1
GGCTTTCCATCCTATT-1_1_1_1_1_1_1	NT1	558	335	4.48029	Singlet	0.0367232	18	18	NT	T_cells	-0.0235512	-0.0514723	G1
GGCTTTCGTATCGCAT-1_1_1_1_1_1_1	NT1	3809	1129	6.61591	Singlet	0.0225989	12	12	NT	T_cells	0.00400312	-0.000266002	S
GGCTTTCGTCCAACGC-1_1_1_1_1_1_1	NT1	811	419	0	Singlet	0	2	2	NT	Myeloid_cells	-0.0211495	0.0972867	G2M
GGGAAGTGTGCACAAG-1_1_1_1_1_1_1	NT1	948	588	2.74262	Singlet	0.0480226	21	21	NT	Others	-0.0328554	-0.0761003	G1
GGGAAGTTCCTTTAGT-1_1_1_1_1_1_1	NT1	5002	1878	0.059976	Singlet	0.372881	22	22	NT	Ductal_cells	0.00926254	-0.0307433	S
GGGAAGTTCTGCCCTA-1_1_1_1_1_1_1	NT1	5157	1520	3.78127	Singlet	0.0169492	0	0	NT	T_cells	0.0314494	0.0692242	G2M
GGGACAAAGCCTAACT-1_1_1_1_1_1_1	NT1	3686	1602	4.9376	Singlet	0.350282	4	4	NT	Myeloid_cells	0.0341404	-0.0120241	S
GGGACAAAGTGTACAA-1_1_1_1_1_1_1	NT1	5837	1588	8.84016	Singlet	0.251412	4	4	NT	Myeloid_cells	0.0130678	-0.0855219	S
GGGACAACAGTCGTTA-1_1_1_1_1_1_1	NT1	1336	575	9.05689	Singlet	0.0225989	7	7	NT	Myeloid_cells	-0.0240401	0.0876196	G2M
GGGACAATCGCCGTGA-1_1_1_1_1_1_1	NT1	7837	2381	10.6418	Singlet	0.389831	14	14	NT	CAFs	0.00542543	-0.0706991	S
GGGACCTAGGACCCAA-1_1_1_1_1_1_1	NT1	854	409	1.63934	Singlet	0.0423729	1	1	NT	Ductal_cells	0.0329194	-0.0132359	S
GGGACCTCACAACCGC-1_1_1_1_1_1_1	NT1	3242	1261	2.74522	Singlet	0.0141243	3	3	NT	T_cells	-0.0547962	0.0523752	G2M
GGGACCTCATACTTTC-1_1_1_1_1_1_1	NT1	3746	1416	4.67165	Singlet	0.0564972	3	3	NT	T_cells	-0.0129029	0.0940795	G2M
GGGACCTTCATTCATC-1_1_1_1_1_1_1	NT1	7270	2464	7.74415	Singlet	0.387006	14	14	NT	CAFs	-0.0446955	-0.0497393	G1
GGGACTCCAGAAGTTA-1_1_1_1_1_1_1	NT1	9430	2258	5.7158	Singlet	0.330508	5	5	NT	Myeloid_cells	-0.0262005	-0.0651529	G1
GGGAGATAGAACCCGA-1_1_1_1_1_1_1	NT1	5140	1559	6.77043	Singlet	0.0903955	9	9	NT	NK_cells	-0.0308632	-0.0741614	G1
GGGAGATCAATAGTAG-1_1_1_1_1_1_1	NT1	2792	1148	3.90401	Singlet	0.00847458	3	3	NT	T_cells	0.0192546	0.129977	G2M
GGGAGATGTGCCGAAA-1_1_1_1_1_1_1	NT1	899	529	1.66852	Singlet	0.0112994	7	7	NT	Myeloid_cells	-0.0368968	0.131122	G2M
GGGAGTAAGCACTAAA-1_1_1_1_1_1_1	NT1	1856	810	8.56681	Singlet	0.118644	4	4	NT	Myeloid_cells	0.00658587	-0.0496206	S
GGGAGTACAAACTAAG-1_1_1_1_1_1_1	NT1	8405	2395	11.1124	Singlet	0.375706	14	14	NT	CAFs	-0.0571346	-0.0464815	G1
GGGAGTATCTGATTCT-1_1_1_1_1_1_1	NT1	2508	1036	6.14035	Singlet	0.00564972	8	8	NT	T_cells	-0.0495994	0.0191516	G2M
GGGATCCCACGAGGAT-1_1_1_1_1_1_1	NT1	1399	759	8.4346	Singlet	0.10452	23	23	NT	T_cells	0.327558	0.343092	G2M
GGGATCCTCCACTGAA-1_1_1_1_1_1_1	NT1	1001	610	0.2997	Singlet	0.149718	22	22	NT	Ductal_cells	0.0218353	-0.0109724	S
GGGATGACAATAACCC-1_1_1_1_1_1_1	NT1	772	504	5.95855	Singlet	0.0423729	23	23	NT	T_cells	0.238257	0.349809	G2M
GGGATGACAATGCTCA-1_1_1_1_1_1_1	NT1	4220	1572	5.78199	Singlet	0.0451977	8	8	NT	T_cells	0.0200129	0.0144656	S
GGGATGAGTCGCACAC-1_1_1_1_1_1_1	NT1	5181	1632	3.74445	Singlet	0.039548	0	0	NT	T_cells	0.0248145	0.0095472	S
GGGCCATCACTGTGTA-1_1_1_1_1_1_1	NT1	5215	1733	4.65964	Singlet	0.129944	3	3	NT	T_cells	0.00073904	-0.0364131	S
GGGCCATGTTATGTGC-1_1_1_1_1_1_1	NT1	7146	2332	12.2166	Singlet	0.372881	14	14	NT	CAFs	-0.039825	-0.0449005	G1
GGGCCATTCATACGGT-1_1_1_1_1_1_1	NT1	4356	1667	2.75482	Singlet	0.175141	3	3	NT	T_cells	0.0890266	0.0159105	S
GGGCCATTCGTAGGGA-1_1_1_1_1_1_1	NT1	4827	1736	5.73855	Singlet	0.169492	3	3	NT	T_cells	0.0104263	-0.0912243	S
GGGCGTTAGAGCAGAA-1_1_1_1_1_1_1	NT1	3880	1387	3.9433	Singlet	0.20904	9	9	NT	NK_cells	0.0904251	-0.0593345	S
GGGCTACAGAAGATCT-1_1_1_1_1_1_1	NT1	8579	2358	8.684	Singlet	0.347458	14	14	NT	CAFs	-0.0344996	-0.0712965	G1
GGGCTACAGATACTGA-1_1_1_1_1_1_1	NT1	1799	722	14.5081	Singlet	0.155367	1	1	NT	Ductal_cells	-0.0441665	-0.00993252	G1
GGGCTACTCGGAGTGA-1_1_1_1_1_1_1	NT1	7181	447	0.0557025	Singlet	0.259887	10	10	NT	NK_cells	-0.0142369	-0.0354241	G1
GGGCTCAAGATGCCGA-1_1_1_1_1_1_1	NT1	3534	1366	4.98019	Singlet	0.0254237	3	3	NT	T_cells	0.0142467	-0.098327	S
GGGCTCAAGGCATGCA-1_1_1_1_1_1_1	NT1	530	355	6.22642	Singlet	0.0536723	14	14	NT	CAFs	-0.0364712	-0.0579768	G1
GGGTAGAGTCAAGTTC-1_1_1_1_1_1_1	NT1	22129	1378	0.0180758	Singlet	0.276836	10	10	NT	NK_cells	-0.00811995	-0.0522658	G1
GGGTAGAGTTGCCAAT-1_1_1_1_1_1_1	NT1	573	390	4.363	Singlet	0.0310734	23	23	NT	T_cells	0.265961	0.562186	G2M
GGGTAGATCGTTACCC-1_1_1_1_1_1_1	NT1	5967	1694	10.8765	Singlet	0.353107	6	6	NT	Myeloid_cells	-0.00464754	-0.0774588	G1
GGGTCACCAGTATTCG-1_1_1_1_1_1_1	NT1	738	401	5.82656	Singlet	0.0367232	1	1	NT	Ductal_cells	-0.0346455	-0.0707557	G1
GGGTCACCATATGAAG-1_1_1_1_1_1_1	NT1	955	541	4.08377	Singlet	0.0988701	4	4	NT	Myeloid_cells	0.0324335	0.201229	G2M
GGGTCACTCGTCGGGT-1_1_1_1_1_1_1	NT1	4987	2055	2.8474	Singlet	0.389831	21	21	NT	Others	-0.0308764	-0.102426	G1
GGGTCACTCTGATGGT-1_1_1_1_1_1_1	NT1	890	562	1.46067	Singlet	0.146893	11	11	NT	Ductal_cells	-0.0491861	-0.0332946	G1
GGGTCTGCACGCAAAG-1_1_1_1_1_1_1	NT1	534	323	1.87266	Singlet	0.00282486	2	2	NT	Myeloid_cells	0.0549422	-0.0641186	S
GGGTGAACAGCAGACA-1_1_1_1_1_1_1	NT1	5101	1760	5.25387	Singlet	0.183616	17	17	NT	NK_cells	-0.0314088	-0.0337774	G1
GGGTGTCGTGGATTTC-1_1_1_1_1_1_1	NT1	3227	1249	5.76387	Singlet	0.0282486	0	0	NT	T_cells	-0.0132773	0.0565984	G2M
GGGTGTCTCAGTGCGC-1_1_1_1_1_1_1	NT1	820	487	4.7561	Singlet	0.059322	14	14	NT	CAFs	-0.0334843	-0.0579596	G1
GGGTGTCTCGCATGAT-1_1_1_1_1_1_1	NT1	6015	1928	4.68828	Singlet	0.183616	3	3	NT	T_cells	0.00866661	0.0262775	G2M
GGGTGTCTCGCTGTCT-1_1_1_1_1_1_1	NT1	1497	717	16.5665	Singlet	0.127119	4	4	NT	Myeloid_cells	-0.0652029	-0.00415165	G1
GGGTGTCTCTCGTGAA-1_1_1_1_1_1_1	NT1	11083	707	0.12632	Singlet	0.262712	10	10	NT	NK_cells	-0.0190768	-0.0280787	G1
GGGTTATCACTCTCGT-1_1_1_1_1_1_1	NT1	2534	1064	8.72139	Singlet	0.00847458	3	3	NT	T_cells	-0.00902141	-0.0322001	G1
GGGTTATCATGCCATA-1_1_1_1_1_1_1	NT1	15786	780	2.2805	Singlet	0.262712	10	10	NT	NK_cells	-0.019638	-0.0406775	G1
GGGTTATTCCGGTAAT-1_1_1_1_1_1_1	NT1	5361	1932	7.55456	Singlet	0.355932	14	14	NT	CAFs	-0.00101651	-0.0410623	G1
GGGTTTAAGCACTCTA-1_1_1_1_1_1_1	NT1	1416	736	4.51977	Singlet	0.135593	1	1	NT	Ductal_cells	0.0235413	0.00187116	S
GGGTTTAAGGGTATAT-1_1_1_1_1_1_1	NT1	4344	1510	5.2256	Singlet	0.0451977	8	8	NT	T_cells	0.0645924	0.0231757	S
GGGTTTAAGTCTGGTT-1_1_1_1_1_1_1	NT1	2074	844	14.5612	Singlet	0.19209	4	4	NT	Myeloid_cells	-0.00523428	-0.00528829	G1
GGGTTTAGTTACGATC-1_1_1_1_1_1_1	NT1	1772	711	7.22348	Singlet	0.144068	13	13	NT	B_cells	0.0107926	-0.0915095	S
GGGTTTATCTGCGTCT-1_1_1_1_1_1_1	NT1	1147	640	1.04621	Singlet	0.059322	7	7	NT	Myeloid_cells	-0.0306072	0.0664632	G2M
GGTAACTAGCGATGGT-1_1_1_1_1_1_1	NT1	3121	779	7.27331	Singlet	0.0734463	4	4	NT	Myeloid_cells	-0.0217128	-0.0527893	G1
GGTAACTAGGCGTCCT-1_1_1_1_1_1_1	NT1	4700	1915	8.38298	Singlet	0.367232	24	24	NT	Others	-0.0805485	-0.122697	G1
GGTAATCAGCAGAAAG-1_1_1_1_1_1_1	NT1	13354	1824	2.92047	Singlet	0.144068	6	6	NT	Myeloid_cells	0.00688043	0.00600502	S
GGTAATCAGCAGTCTT-1_1_1_1_1_1_1	NT1	2720	1157	3.78676	Singlet	0.00847458	8	8	NT	T_cells	-0.008363	-0.00592948	G1
GGTAATCCAGCTTTCC-1_1_1_1_1_1_1	NT1	958	493	2.40084	Singlet	0	2	2	NT	Myeloid_cells	-0.023322	0.0324014	G2M
GGTAGAGAGCACGGAT-1_1_1_1_1_1_1	NT1	3202	1246	4.84072	Singlet	0.0112994	3	3	NT	T_cells	0.0880467	-0.0185734	S
GGTAGAGCAGAGTGTG-1_1_1_1_1_1_1	NT1	2570	1011	3.96887	Singlet	0.0112994	8	8	NT	T_cells	0.00306295	-0.0606216	S
GGTAGAGCATGCCGAC-1_1_1_1_1_1_1	NT1	17226	862	0.0870777	Singlet	0.262712	10	10	NT	NK_cells	-0.0150754	-0.0432168	G1
GGTAGAGCATGTCGTA-1_1_1_1_1_1_1	NT1	4596	1378	7.85466	Singlet	0.330508	6	6	NT	Myeloid_cells	0.0100223	-0.014683	S
GGTAGAGGTGAATAAC-1_1_1_1_1_1_1	NT1	4047	1385	4.67013	Singlet	0.0310734	0	0	NT	T_cells	-0.0435991	-0.0236731	G1
GGTCACGAGGTCACCC-1_1_1_1_1_1_1	NT1	3467	1316	6.48976	Singlet	0.00847458	3	3	NT	T_cells	0.0527935	-0.0209496	S
GGTCACGCAGAAATTG-1_1_1_1_1_1_1	NT1	5141	1809	4.43493	Singlet	0.375706	4	4	NT	Myeloid_cells	-0.00525175	-0.0250422	G1
GGTCACGCATAGCTGT-1_1_1_1_1_1_1	NT1	1385	678	1.51625	Singlet	0.0564972	2	2	NT	Myeloid_cells	0.0811896	0.0882008	G2M
GGTCACGCATGTACGT-1_1_1_1_1_1_1	NT1	3321	1358	2.77025	Singlet	0.180791	9	9	NT	NK_cells	0.0893788	0.027851	S
GGTCTGGAGAGTATAC-1_1_1_1_1_1_1	NT1	8555	628	0.0116891	Singlet	0.257062	10	10	NT	NK_cells	-0.0166191	-0.0413607	G1
GGTCTGGTCACTTATC-1_1_1_1_1_1_1	NT1	3944	1462	5.57809	Singlet	0.039548	3	3	NT	T_cells	-0.0133347	0.0672375	G2M
GGTCTGGTCTCGACGG-1_1_1_1_1_1_1	NT1	31572	1014	0.281895	Singlet	0.257062	10	10	NT	NK_cells	-0.0124776	-0.0331923	G1
GGTGAAGCACGCGTCA-1_1_1_1_1_1_1	NT1	1024	443	20.8984	Singlet	0.0734463	0	0	NT	T_cells	-0.0380686	0.00290198	G2M
GGTGAAGCATGATCTG-1_1_1_1_1_1_1	NT1	5136	1688	8.02181	Singlet	0.079096	3	3	NT	T_cells	0.0138872	-0.0385851	S
GGTGAAGGTAGCTGTT-1_1_1_1_1_1_1	NT1	985	498	18.1726	Singlet	0.0282486	0	0	NT	T_cells	-0.033089	-0.0626425	G1
GGTGATTAGCTTAGTC-1_1_1_1_1_1_1	NT1	1554	949	7.72201	Singlet	0.211864	20	20	NT	Ductal_cells	-0.00306528	0.503371	G2M
GGTGGCTCATGTGGTT-1_1_1_1_1_1_1	NT1	3924	1513	13.0734	Singlet	0.299435	14	14	NT	CAFs	-0.0620273	-0.0891531	G1
GGTGGCTGTCATCCCT-1_1_1_1_1_1_1	NT1	1924	982	10.7069	Singlet	0.259887	5	5	NT	Myeloid_cells	0.196267	0.2509	G2M
GGTGTCGAGAGAGGGC-1_1_1_1_1_1_1	NT1	3751	1301	5.78512	Singlet	0.0282486	0	0	NT	T_cells	0.0561815	0.0326773	S
GGTGTCGAGGTCGACA-1_1_1_1_1_1_1	NT1	1146	548	3.66492	Singlet	0.0169492	7	7	NT	Myeloid_cells	-0.0368569	0.0507414	G2M
GGTGTCGCAAGAGCTG-1_1_1_1_1_1_1	NT1	2451	1106	4.61036	Singlet	0.19209	4	4	NT	Myeloid_cells	-0.0582215	-0.0825959	G1
GGTGTCGCACGCACCA-1_1_1_1_1_1_1	NT1	1093	590	0.73193	Singlet	0.0254237	7	7	NT	Myeloid_cells	-0.0385508	-0.0234712	G1
GGTGTTAAGCCTTTGA-1_1_1_1_1_1_1	NT1	3038	1252	8.4266	Singlet	0.0141243	3	3	NT	T_cells	0.0532685	-0.0811951	S
GGTGTTACACAAACGG-1_1_1_1_1_1_1	NT1	3126	1259	3.51887	Singlet	0.00847458	3	3	NT	T_cells	-0.0256187	-0.0524557	G1
GGTTAACAGGTTGGAC-1_1_1_1_1_1_1	NT1	3393	1207	7.98703	Singlet	0.019774	3	3	NT	T_cells	0.0230664	-0.053162	S
GGTTAACTCGTTCTGC-1_1_1_1_1_1_1	NT1	502	323	8.16733	Singlet	0.039548	5	5	NT	Myeloid_cells	-0.00977977	0.0157634	G2M
GGTTCTCTCCGTCCTA-1_1_1_1_1_1_1	NT1	574	421	2.78746	Singlet	0.0564972	14	14	NT	CAFs	-0.0385183	-0.06245	G1
GGTTCTCTCTCATAGG-1_1_1_1_1_1_1	NT1	1435	675	1.60279	Singlet	0.0310734	2	2	NT	Myeloid_cells	0.0128476	-0.041289	S
GGTTCTCTCTGGCTGG-1_1_1_1_1_1_1	NT1	725	470	6.62069	Singlet	0.039548	23	23	NT	T_cells	0.0333425	0.750308	G2M
GGTTGTAAGCAGGGAG-1_1_1_1_1_1_1	NT1	3701	1454	8.37611	Singlet	0.237288	3	3	NT	T_cells	-0.0489716	-0.0496708	G1
GGTTGTAAGTAGAGTT-1_1_1_1_1_1_1	NT1	2220	1074	16.5766	Singlet	0.274011	14	14	NT	CAFs	-0.0120569	-0.0649527	G1
GGTTGTACAGTATACC-1_1_1_1_1_1_1	NT1	3650	1320	4.43836	Singlet	0.0169492	3	3	NT	T_cells	0.111645	-0.0665556	S
GGTTGTATCAAGGAGC-1_1_1_1_1_1_1	NT1	4195	1456	6.38856	Singlet	0.0254237	3	3	NT	T_cells	0.0508414	-0.00286269	S
GGTTGTATCACTAGCA-1_1_1_1_1_1_1	NT1	3909	1404	6.06293	Singlet	0.0112994	3	3	NT	T_cells	0.0722059	-0.0816386	S
GTAACACAGGCTCAAG-1_1_1_1_1_1_1	NT1	4819	1821	5.95559	Singlet	0.285311	5	5	NT	Myeloid_cells	-0.0651045	0.0348307	G2M
GTAACACCACTGGATT-1_1_1_1_1_1_1	NT1	4065	379	0	Singlet	0.237288	10	10	NT	NK_cells	-0.0131008	-0.0103044	G1
GTAACACTCAGCTTCC-1_1_1_1_1_1_1	NT1	6259	2345	2.31666	Singlet	0.384181	21	21	NT	Others	0.0330682	-0.0637538	S
GTAACCACATCATCCC-1_1_1_1_1_1_1	NT1	1910	802	16.4398	Singlet	0.223164	11	11	NT	Ductal_cells	0.00614813	-0.0482633	S
GTAAGTCTCCGCGAGT-1_1_1_1_1_1_1	NT1	1331	664	3.75657	Singlet	0.129944	4	4	NT	Myeloid_cells	0.0166983	0.0365998	G2M
GTAATCGAGCTACTAC-1_1_1_1_1_1_1	NT1	5213	1666	6.34951	Singlet	0.0480226	3	3	NT	T_cells	-0.0217385	-0.00849282	G1
GTAATCGAGTCAAGCG-1_1_1_1_1_1_1	NT1	4114	1474	7.65678	Singlet	0.0310734	3	3	NT	T_cells	0.0156205	0.0605618	G2M
GTAATCGCACGTCTCT-1_1_1_1_1_1_1	NT1	3060	1156	6.17647	Singlet	0.00282486	3	3	NT	T_cells	0.0571706	-0.0421561	S
GTAATCGTCGCCAATA-1_1_1_1_1_1_1	NT1	5549	1735	9.67742	Singlet	0.350282	6	6	NT	Myeloid_cells	0.014566	-0.0267856	S
GTAATGCGTGACCGTC-1_1_1_1_1_1_1	NT1	1170	526	5.98291	Singlet	0.079096	4	4	NT	Myeloid_cells	-0.0147053	-0.0790564	G1
GTAATGCGTGTTCCAA-1_1_1_1_1_1_1	NT1	614	392	4.39739	Singlet	0.00564972	2	2	NT	Myeloid_cells	-0.0201336	0.0169278	G2M
GTACAACAGCATTGTC-1_1_1_1_1_1_1	NT1	636	363	1.88679	Singlet	0	2	2	NT	Myeloid_cells	-0.0160283	-0.0172587	G1
GTACAACAGGCAGGTT-1_1_1_1_1_1_1	NT1	760	369	24.2105	Singlet	0.039548	4	4	NT	Myeloid_cells	0.0443813	0.0108258	S
GTACAACAGTACCCTA-1_1_1_1_1_1_1	NT1	1475	585	2.71186	Singlet	0.00564972	7	7	NT	Myeloid_cells	-0.0214298	0.0433332	G2M
GTACAACCATACTTTC-1_1_1_1_1_1_1	NT1	3922	1638	5.40541	Singlet	0.274011	9	9	NT	NK_cells	-0.0336409	0.0491527	G2M
GTACAACGTCCACACG-1_1_1_1_1_1_1	NT1	1690	708	4.26036	Singlet	0.121469	4	4	NT	Myeloid_cells	0.0153372	-0.00649627	S
GTACAGTCAACGTATC-1_1_1_1_1_1_1	NT1	1232	663	3.97727	Singlet	0.0819209	1	1	NT	Ductal_cells	0.0173477	0.000626193	S
GTACAGTTCTGTGCAA-1_1_1_1_1_1_1	NT1	1234	607	23.5008	Singlet	0.0932203	18	18	NT	T_cells	-0.0584406	0.0176252	G2M
GTAGAAAGTGTATTCG-1_1_1_1_1_1_1	NT1	550	387	12.1818	Singlet	0.0734463	11	11	NT	Ductal_cells	-0.0283776	0.0457271	G2M
GTAGAGGAGGGCTGAT-1_1_1_1_1_1_1	NT1	703	395	15.6472	Singlet	0.0875706	1	1	NT	Ductal_cells	-0.0215948	0.0415921	G2M
GTAGAGGTCAACTTTC-1_1_1_1_1_1_1	NT1	4622	1439	6.23107	Singlet	0.220339	13	13	NT	B_cells	0.00208029	-0.0753666	S
GTAGCTAAGAATAGTC-1_1_1_1_1_1_1	NT1	3626	1547	8.93547	Singlet	0.313559	24	24	NT	Others	0.039222	-0.122206	S
GTAGCTAGTAGGGTAC-1_1_1_1_1_1_1	NT1	1036	602	2.41313	Singlet	0.0706215	21	21	NT	Others	-0.0376341	-0.0772401	G1
GTAGGAGGTAACTAAG-1_1_1_1_1_1_1	NT1	4041	1565	3.93467	Singlet	0.211864	9	9	NT	NK_cells	0.101242	-0.0104886	S
GTAGGAGGTATCGTTG-1_1_1_1_1_1_1	NT1	519	408	6.93642	Singlet	0.0338983	21	21	NT	Others	-0.0416188	0.0380765	G2M
GTAGGTTTCCTCGATC-1_1_1_1_1_1_1	NT1	3517	1359	3.81007	Singlet	0.0310734	8	8	NT	T_cells	0.0136201	0.0268045	G2M
GTAGGTTTCGGAGCAA-1_1_1_1_1_1_1	NT1	4154	1572	4.83871	Singlet	0.223164	9	9	NT	NK_cells	0.0121175	-0.0304255	S
GTAGTACCAGTACTAC-1_1_1_1_1_1_1	NT1	8949	465	0.0558722	Singlet	0.251412	10	10	NT	NK_cells	-0.0121672	-0.0285159	G1
GTATTGGAGACGCCCT-1_1_1_1_1_1_1	NT1	3217	1186	4.56947	Singlet	0.0112994	0	0	NT	T_cells	-0.00611272	0.0131353	G2M
GTATTGGAGGAATCGC-1_1_1_1_1_1_1	NT1	1249	594	2.32186	Singlet	0.0225989	7	7	NT	Myeloid_cells	0.0806739	-0.00703181	S
GTATTGGAGGGATCAC-1_1_1_1_1_1_1	NT1	1388	664	2.16138	Singlet	0.059322	7	7	NT	Myeloid_cells	-0.0356583	0.0392009	G2M
GTATTGGTCAATCGGT-1_1_1_1_1_1_1	NT1	3667	1418	5.45405	Singlet	0.0338983	3	3	NT	T_cells	0.0145589	0.0163859	G2M
GTATTTCTCTATACGG-1_1_1_1_1_1_1	NT1	835	428	2.99401	Singlet	0.0112994	2	2	NT	Myeloid_cells	-0.020933	-0.0011558	G1
GTATTTCTCTGTCTCG-1_1_1_1_1_1_1	NT1	4629	1532	4.99028	Singlet	0.0169492	0	0	NT	T_cells	0.120669	0.0418222	S
GTCAAACCACGCTGCA-1_1_1_1_1_1_1	NT1	2790	1098	7.16846	Singlet	0.0762712	0	0	NT	T_cells	0.005116	-0.0251742	S
GTCAAACCAGCACACC-1_1_1_1_1_1_1	NT1	1261	626	7.05789	Singlet	0.110169	4	4	NT	Myeloid_cells	-0.0254998	0.0418784	G2M
GTCAAACTCACCGGGT-1_1_1_1_1_1_1	NT1	1948	842	1.95072	Singlet	0.0706215	7	7	NT	Myeloid_cells	-0.0364111	0.00227023	G2M
GTCAAGTCAAGCGGAT-1_1_1_1_1_1_1	NT1	4410	1331	5.10204	Singlet	0.214689	13	13	NT	B_cells	0.063186	0.0214743	S
GTCAAGTCACTCATAG-1_1_1_1_1_1_1	NT1	4913	1507	6.20802	Singlet	0.0141243	3	3	NT	T_cells	-0.0245524	0.0432929	G2M
GTCAAGTGTACCTTCC-1_1_1_1_1_1_1	NT1	3882	1574	5.35806	Singlet	0.10452	3	3	NT	T_cells	0.0367198	0.0411725	G2M
GTCAAGTTCACGGTCG-1_1_1_1_1_1_1	NT1	4134	1331	8.68408	Singlet	0.0141243	3	3	NT	T_cells	-0.0479502	0.000598919	G2M
GTCACTCAGCTGCCTG-1_1_1_1_1_1_1	NT1	562	387	2.13523	Singlet	0.0649718	24	24	NT	Others	-0.0221	-0.0768895	G1
GTCACTCAGTAACCGG-1_1_1_1_1_1_1	NT1	4102	1404	6.09459	Singlet	0.0310734	3	3	NT	T_cells	0.0460593	0.0370145	S
GTCACTCCAAGCAATA-1_1_1_1_1_1_1	NT1	836	500	2.15311	Singlet	0.00847458	7	7	NT	Myeloid_cells	-0.0244841	0.0654523	G2M
GTCACTCCACTGTCGG-1_1_1_1_1_1_1	NT1	5171	1766	7.29066	Singlet	0.141243	3	3	NT	T_cells	-0.00112954	-0.0501017	G1
GTCACTCTCACTCGAA-1_1_1_1_1_1_1	NT1	3971	1512	8.53689	Singlet	0.0847458	3	3	NT	T_cells	0.128335	0.00432937	S
GTCAGCGCACTTCCTG-1_1_1_1_1_1_1	NT1	1015	674	8.57143	Singlet	0.144068	20	20	NT	Ductal_cells	-0.0416103	-0.0729966	G1
GTCAGCGGTGGCTAGA-1_1_1_1_1_1_1	NT1	3736	1167	5.83512	Singlet	0.0169492	3	3	NT	T_cells	-0.0328513	0.00819958	G2M
GTCATCCAGAGTAACT-1_1_1_1_1_1_1	NT1	1242	559	4.66989	Singlet	0.0988701	4	4	NT	Myeloid_cells	-0.0233021	-0.0704715	G1
GTCATCCCAGCGTGCT-1_1_1_1_1_1_1	NT1	875	437	13.7143	Singlet	0.0112994	2	2	NT	Myeloid_cells	0.0330306	0.037958	G2M
GTCATTTAGCATTTGC-1_1_1_1_1_1_1	NT1	2231	1172	2.37562	Singlet	0.254237	21	21	NT	Others	-0.0149938	-0.114569	G1
GTCATTTGTCGTTATG-1_1_1_1_1_1_1	NT1	3861	1713	4.6102	Singlet	0.240113	17	17	NT	NK_cells	0.0130082	-0.0519731	S
GTCCACTGTTAGGCTT-1_1_1_1_1_1_1	NT1	3976	1449	6.76559	Singlet	0.0338983	3	3	NT	T_cells	0.0744779	-0.0319865	S
GTCCACTTCCTGCCAT-1_1_1_1_1_1_1	NT1	3924	1605	7.79817	Singlet	0.177966	3	3	NT	T_cells	-0.0299462	-0.00840962	G1
GTCCCATCACACGCCA-1_1_1_1_1_1_1	NT1	8183	2231	8.96982	Singlet	0.355932	14	14	NT	CAFs	-0.0176292	-0.0690348	G1
GTCCCATCAGGCTACC-1_1_1_1_1_1_1	NT1	1262	666	1.03011	Singlet	0.059322	7	7	NT	Myeloid_cells	-0.0412403	-0.0381285	G1
GTCCCATCAGTATACC-1_1_1_1_1_1_1	NT1	1307	602	20.0459	Singlet	0.0903955	21	21	NT	Others	-0.0450946	-0.0648641	G1
GTCCCATGTAGCGTAG-1_1_1_1_1_1_1	NT1	5812	1773	10.4783	Singlet	0.355932	6	6	NT	Myeloid_cells	-0.0343398	0.0168813	G2M
GTCCTCAGTGGCTGAA-1_1_1_1_1_1_1	NT1	5974	2078	6.54503	Singlet	0.358757	4	4	NT	Myeloid_cells	-0.025435	-0.115729	G1
GTCCTCATCTCAGTCC-1_1_1_1_1_1_1	NT1	4394	1978	4.39235	Singlet	0.319209	9	9	NT	NK_cells	-0.0225987	-0.0272005	G1
GTCGAATCATGTGACT-1_1_1_1_1_1_1	NT1	3949	1439	3.77311	Singlet	0.0282486	3	3	NT	T_cells	0.020667	0.00284563	S
GTCGCGAAGCGGACAT-1_1_1_1_1_1_1	NT1	14446	2333	3.46117	Singlet	0.166667	15	15	NT	B_cells	-0.0190712	-0.0668544	G1
GTCGCGAGTACTTGTG-1_1_1_1_1_1_1	NT1	3128	1094	4.0601	Singlet	0.0141243	8	8	NT	T_cells	0.0436402	-0.0405719	S
GTCGCGATCAACGAGG-1_1_1_1_1_1_1	NT1	3603	1288	6.32806	Singlet	0.00847458	3	3	NT	T_cells	-0.0483557	-0.034125	G1
GTCGTAAAGAGGATGA-1_1_1_1_1_1_1	NT1	5864	363	0.0511596	Singlet	0.242938	10	10	NT	NK_cells	-0.0125722	-0.0147704	G1
GTCGTTCAGCACTCAT-1_1_1_1_1_1_1	NT1	3319	1168	5.36306	Singlet	0.0141243	3	3	NT	T_cells	0.0355624	-0.0517595	S
GTCTACCGTTCCACAA-1_1_1_1_1_1_1	NT1	5150	1599	7.94175	Singlet	0.101695	9	9	NT	NK_cells	0.0121476	0.0113922	S
GTCTACCTCCTGCCAT-1_1_1_1_1_1_1	NT1	9761	2064	4.96875	Singlet	0.0338983	0	0	NT	T_cells	-0.0239981	-0.0340633	G1
GTCTAGACAGGACATG-1_1_1_1_1_1_1	NT1	5649	356	0.0177022	Singlet	0.248588	10	10	NT	NK_cells	-0.0137837	-0.0317324	G1
GTCTCACAGGGTTGCA-1_1_1_1_1_1_1	NT1	27266	1100	0.0183379	Singlet	0.271186	10	10	NT	NK_cells	-0.00795747	-0.0390984	G1
GTCTCACGTAACATAG-1_1_1_1_1_1_1	NT1	648	418	4.93827	Singlet	0.0762712	14	14	NT	CAFs	-0.0503786	-0.048752	G1
GTCTCACGTACAGTTC-1_1_1_1_1_1_1	NT1	4932	1781	9.61071	Singlet	0.279661	14	14	NT	CAFs	-0.0553104	-0.0993309	G1
GTCTCACGTACGATTC-1_1_1_1_1_1_1	NT1	4240	1342	7.16981	Singlet	0.20339	13	13	NT	B_cells	0.0380457	-0.0657638	S
GTCTCACGTGCACGCT-1_1_1_1_1_1_1	NT1	14382	353	0.152969	Singlet	0.0649718	19	19	NT	Myeloid_cells	-0.0052042	-0.0139401	G1
GTCTCACTCCTGTTGC-1_1_1_1_1_1_1	NT1	1218	607	0.492611	Singlet	0.0169492	7	7	NT	Myeloid_cells	-0.0263852	0.0441267	G2M
GTCTGTCCACAAGGTG-1_1_1_1_1_1_1	NT1	715	369	1.53846	Singlet	0.0762712	1	1	NT	Ductal_cells	-0.0183477	-0.0585753	G1
GTCTGTCCACTTCCTG-1_1_1_1_1_1_1	NT1	689	413	6.38607	Singlet	0	2	2	NT	Myeloid_cells	-0.0236502	0.138239	G2M
GTCTGTCGTCACCGCA-1_1_1_1_1_1_1	NT1	4800	1700	6.97917	Singlet	0.155367	3	3	NT	T_cells	0.025215	-0.0979962	S
GTCTGTCTCGATCCCT-1_1_1_1_1_1_1	NT1	678	367	3.83481	Singlet	0.0423729	4	4	NT	Myeloid_cells	-0.0139958	-0.00690231	G1
GTCTGTCTCTGAGGCC-1_1_1_1_1_1_1	NT1	4223	1462	3.59934	Singlet	0.0282486	8	8	NT	T_cells	-0.0422556	-0.0560966	G1
GTCTTTACACGCCACA-1_1_1_1_1_1_1	NT1	4317	1486	6.81028	Singlet	0.0451977	3	3	NT	T_cells	0.0680877	-0.0129207	S
GTCTTTAGTTTCGATG-1_1_1_1_1_1_1	NT1	1130	548	2.38938	Singlet	0	2	2	NT	Myeloid_cells	-0.0289776	0.0205258	G2M
GTGACGCCATCCTGTC-1_1_1_1_1_1_1	NT1	2173	871	22.2734	Singlet	0.149718	15	15	NT	B_cells	0.0314156	-0.0183982	S
GTGACGCTCCTTACCG-1_1_1_1_1_1_1	NT1	4395	1883	2.84414	Singlet	0.375706	21	21	NT	Others	0.0250689	-0.0179127	S
GTGAGCCAGCGTTAGG-1_1_1_1_1_1_1	NT1	5234	1856	6.05655	Singlet	0.251412	0	0	NT	T_cells	0.100684	-0.00662106	S
GTGAGCCCACAAAGCG-1_1_1_1_1_1_1	NT1	3951	1652	6.90964	Singlet	0.336158	22	22	NT	Ductal_cells	-0.0446831	-0.00127051	G1
GTGAGGAAGGGTTGCA-1_1_1_1_1_1_1	NT1	2335	1032	18.3298	Singlet	0.138418	3	3	NT	T_cells	-0.0770265	-0.0288147	G1
GTGAGGACATTGTAGC-1_1_1_1_1_1_1	NT1	1669	741	4.97304	Singlet	0.0480226	1	1	NT	Ductal_cells	0.0110916	-0.0390304	S
GTGAGGATCAGGACAG-1_1_1_1_1_1_1	NT1	852	456	0.821596	Singlet	0	2	2	NT	Myeloid_cells	-0.0192158	0.0329912	G2M
GTGAGTTGTTCCGCGA-1_1_1_1_1_1_1	NT1	1209	658	3.72208	Singlet	0.0367232	7	7	NT	Myeloid_cells	-0.0301863	0.0975298	G2M
GTGATGTCAACCAACT-1_1_1_1_1_1_1	NT1	6324	1772	23.814	Singlet	0.293785	14	14	NT	CAFs	-0.0569552	0.00181478	G2M
GTGATGTGTTATAGAG-1_1_1_1_1_1_1	NT1	6883	1937	6.08746	Singlet	0.358757	6	6	NT	Myeloid_cells	-0.0367019	-0.0440175	G1
GTGATGTTCATGGGAG-1_1_1_1_1_1_1	NT1	4704	1571	8.63095	Singlet	0.350282	6	6	NT	Myeloid_cells	0.050661	0.00556711	S
GTGATGTTCGCTGTCT-1_1_1_1_1_1_1	NT1	1584	684	0.441919	Singlet	0.0564972	7	7	NT	Myeloid_cells	0.00905411	-0.0221664	S
GTGCACGCAGCAGTGA-1_1_1_1_1_1_1	NT1	4662	1618	6.99271	Singlet	0.0847458	3	3	NT	T_cells	-0.0505012	-0.0821563	G1
GTGCACGGTATGGAAT-1_1_1_1_1_1_1	NT1	2530	1257	7.78656	Singlet	0.262712	20	20	NT	Ductal_cells	-0.0771431	-0.0143329	G1
GTGCAGCCAATCTGCA-1_1_1_1_1_1_1	NT1	4256	1479	7.91823	Singlet	0.0282486	3	3	NT	T_cells	-0.0157226	0.0307503	G2M
GTGCAGCCAGGCTATT-1_1_1_1_1_1_1	NT1	25117	1118	0.250826	Singlet	0.265537	10	10	NT	NK_cells	-0.0155815	-0.0361815	G1
GTGCAGCCATATTCGG-1_1_1_1_1_1_1	NT1	899	500	8.45384	Singlet	0.0254237	3	3	NT	T_cells	-0.0261352	0.100756	G2M
GTGCAGCGTACAAACA-1_1_1_1_1_1_1	NT1	1754	718	9.52109	Singlet	0.0169492	3	3	NT	T_cells	0.00340918	-0.0476576	S
GTGCAGCGTACCTAGT-1_1_1_1_1_1_1	NT1	899	474	2.78087	Singlet	0.0819209	4	4	NT	Myeloid_cells	-0.0241037	-0.0844411	G1
GTGCAGCGTGGTCTGC-1_1_1_1_1_1_1	NT1	3517	1193	8.7006	Singlet	0.00282486	3	3	NT	T_cells	-0.0485013	-0.0162148	G1
GTGCAGCTCAAAGGTA-1_1_1_1_1_1_1	NT1	542	317	2.39852	Singlet	0.0480226	1	1	NT	Ductal_cells	-0.0219435	0.00532504	G2M
GTGCAGCTCTCGCAGG-1_1_1_1_1_1_1	NT1	3946	1237	4.66295	Singlet	0	3	3	NT	T_cells	-0.0112189	-0.00254985	G1
GTGCGTGTCAGCCTTC-1_1_1_1_1_1_1	NT1	984	663	5.99593	Singlet	0.110169	1	1	NT	Ductal_cells	-0.0490541	0.0518033	G2M
GTGCTGGCACAATGCT-1_1_1_1_1_1_1	NT1	3638	1333	0.0274876	Singlet	0.214689	1	1	NT	Ductal_cells	-0.000901446	0.0420529	G2M
GTGCTGGGTTCGGACC-1_1_1_1_1_1_1	NT1	3542	1252	9.96612	Singlet	0.00282486	3	3	NT	T_cells	0.0961893	0.0211506	S
GTGCTTCCAGACCCGT-1_1_1_1_1_1_1	NT1	2090	928	1.24402	Singlet	0.0762712	7	7	NT	Myeloid_cells	-0.0469328	0.0563005	G2M
GTGCTTCCATGGCGCT-1_1_1_1_1_1_1	NT1	4142	1545	7.26702	Singlet	0.361582	6	6	NT	Myeloid_cells	-0.00362714	-0.0665141	G1
GTGCTTCTCACTTGGA-1_1_1_1_1_1_1	NT1	4453	1615	8.08444	Singlet	0.0903955	3	3	NT	T_cells	0.033098	-0.00545737	S
GTGGAAGAGACAGCGT-1_1_1_1_1_1_1	NT1	7757	2406	9.30772	Singlet	0.375706	4	4	NT	Myeloid_cells	-0.0532098	-0.0889045	G1
GTGGAAGGTAACAGGC-1_1_1_1_1_1_1	NT1	6107	1590	6.40249	Singlet	0.20339	13	13	NT	B_cells	0.0554335	-0.0551747	S
GTGGAAGGTGGAGGTT-1_1_1_1_1_1_1	NT1	662	386	3.32326	Singlet	0.0367232	1	1	NT	Ductal_cells	-0.0209561	-0.0648524	G1
GTGGAAGGTTCCGCAG-1_1_1_1_1_1_1	NT1	2113	895	8.99195	Singlet	0.248588	5	5	NT	Myeloid_cells	0.0130329	-0.0658197	S
GTGGAGAAGAATTGTG-1_1_1_1_1_1_1	NT1	6471	2163	11.5284	Singlet	0.367232	14	14	NT	CAFs	-0.0119894	-0.116772	G1
GTGGAGAAGGTGAGCT-1_1_1_1_1_1_1	NT1	1936	751	16.3223	Singlet	0.158192	6	6	NT	Myeloid_cells	-0.0343243	-0.07851	G1
GTGGAGAAGGTGGCTA-1_1_1_1_1_1_1	NT1	4378	1519	6.53266	Singlet	0.367232	6	6	NT	Myeloid_cells	0.00649945	-0.0675505	S
GTGGAGAGTACGGGAT-1_1_1_1_1_1_1	NT1	557	345	4.48833	Singlet	0.00564972	2	2	NT	Myeloid_cells	-0.0199395	0.00973909	G2M
GTGGAGAGTCTTGTCC-1_1_1_1_1_1_1	NT1	1983	940	8.42158	Singlet	0.00847458	0	0	NT	T_cells	-0.0545542	-0.0604442	G1
GTGGAGAGTTCAGCTA-1_1_1_1_1_1_1	NT1	852	316	2.69953	Singlet	0.0932203	24	24	NT	Others	-0.0192158	-0.0509341	G1
GTGGCGTAGTTCCAGT-1_1_1_1_1_1_1	NT1	18374	822	0	Singlet	0.262712	10	10	NT	NK_cells	0.0173221	-0.029458	S
GTGGGAAGTTACGTAC-1_1_1_1_1_1_1	NT1	659	414	4.40061	Singlet	0.0480226	1	1	NT	Ductal_cells	-0.0349509	0.0562373	G2M
GTGGTTAAGCTCGAAG-1_1_1_1_1_1_1	NT1	1513	705	14.6728	Singlet	0.0480226	17	17	NT	NK_cells	-0.00355782	0.0357572	G2M
GTGGTTAGTATGTGTC-1_1_1_1_1_1_1	NT1	1655	797	7.61329	Singlet	0.00847458	0	0	NT	T_cells	0.0191709	-0.0869605	S
GTGGTTAGTGTAGCAG-1_1_1_1_1_1_1	NT1	1369	558	1.31483	Singlet	0.019774	2	2	NT	Myeloid_cells	0.0315646	0.0659248	G2M
GTGGTTATCCAATCCC-1_1_1_1_1_1_1	NT1	595	334	0.168067	Singlet	0.059322	4	4	NT	Myeloid_cells	-0.0141938	-0.0477451	G1
GTGGTTATCGGTCAGC-1_1_1_1_1_1_1	NT1	3406	1230	5.49031	Singlet	0.00847458	3	3	NT	T_cells	-0.0511897	0.0563922	G2M
GTGTAACAGATAACGT-1_1_1_1_1_1_1	NT1	790	516	7.21519	Singlet	0.079096	20	20	NT	Ductal_cells	0.0240382	-0.0320745	S
GTGTAACTCAAGCGTT-1_1_1_1_1_1_1	NT1	891	528	14.5903	Singlet	0.0847458	11	11	NT	Ductal_cells	-0.0348832	0.00935234	G2M
GTGTCCTAGACGTCCC-1_1_1_1_1_1_1	NT1	664	395	0.753012	Singlet	0	7	7	NT	Myeloid_cells	-0.0106713	-0.0110164	G1
GTGTCCTCAAGCTGTT-1_1_1_1_1_1_1	NT1	1000	413	6.8	Singlet	0.0423729	1	1	NT	Ductal_cells	-0.0162519	0.0317503	G2M
GTGTGATAGGGTATAT-1_1_1_1_1_1_1	NT1	582	320	4.98282	Singlet	0.0451977	5	5	NT	Myeloid_cells	-0.0240519	0.0133917	G2M
GTGTGATCACGGCCAT-1_1_1_1_1_1_1	NT1	2985	1367	6.19765	Singlet	0.10452	8	8	NT	T_cells	0.00728546	-0.0362682	S
GTGTGATCATGGGCAA-1_1_1_1_1_1_1	NT1	4152	1458	6.79191	Singlet	0.341808	6	6	NT	Myeloid_cells	-0.0164467	-0.00400541	G1
GTGTGATGTTACACAC-1_1_1_1_1_1_1	NT1	6945	2362	7.66019	Singlet	0.384181	13	13	NT	B_cells	0.00849985	-0.0734974	S
GTGTGATTCAGCGGAA-1_1_1_1_1_1_1	NT1	30511	1242	1.00947	Singlet	0.268362	10	10	NT	NK_cells	-0.00424444	-0.0390523	G1
GTGTGATTCCGATGCG-1_1_1_1_1_1_1	NT1	3715	1484	8.04845	Singlet	0.322034	4	4	NT	Myeloid_cells	-0.00106669	-0.0214989	G1
GTGTGATTCTACACAG-1_1_1_1_1_1_1	NT1	955	456	3.87435	Singlet	0.00282486	2	2	NT	Myeloid_cells	-0.011163	-0.0200088	G1
GTGTGGCGTCTGCATA-1_1_1_1_1_1_1	NT1	3745	1266	4.43258	Singlet	0.019774	0	0	NT	T_cells	-0.0392572	-0.0760904	G1
GTGTGGCTCGGTATGT-1_1_1_1_1_1_1	NT1	9360	607	0.299145	Singlet	0.262712	10	10	NT	NK_cells	0.00414054	-0.039484	S
GTGTGGCTCTCCGATC-1_1_1_1_1_1_1	NT1	1002	546	1.79641	Singlet	0.00564972	16	16	NT	Myeloid_cells	-0.0254959	0.00697896	G2M
GTGTTAGAGAGTCGAC-1_1_1_1_1_1_1	NT1	531	345	2.07156	Singlet	0	7	7	NT	Myeloid_cells	-0.0184061	0.0792916	G2M
GTGTTAGCACTGCTTC-1_1_1_1_1_1_1	NT1	629	401	1.11288	Singlet	0	2	2	NT	Myeloid_cells	-0.0174197	0.0403218	G2M
[truncated: 30,482 more rows]

## Sheet: S3
Supplementary Table 3. List of differentially expressed genes of the 26 cellular subclusters.
p_val	avg_log2FC	pct.1	pct.2	p_val_adj	cluster	gene
0	2.44964	0.934	0.172	0	0	IL7R
0	2.13839	0.92	0.252	0	0	LTB
0	1.65523	0.533	0.037	0	0	CCR7
0	1.6253	0.866	0.294	0	0	LDHB
0	1.593	0.817	0.183	0	0	GIMAP7
0	1.58736	0.992	0.791	0	0	RPS12
0	1.49337	0.988	0.76	0	0	RPS29
0	1.47544	0.597	0.07	0	0	TCF7
0	1.44001	0.587	0.07	0	0	PRKCQ-AS1
0	1.4302	0.994	0.839	0	0	RPS27
0	1.39405	0.958	0.638	0	0	RPS10
0	1.38948	0.991	0.786	0	0	RPS18
0	1.36177	0.977	0.701	0	0	RPS21
0	1.35179	0.987	0.756	0	0	RPS6
0	1.34874	0.896	0.194	0	0	CD3D
0	1.33108	0.99	0.808	0	0	RPL34
0	1.31649	0.989	0.784	0	0	RPS15A
0	1.31012	0.451	0.013	0	0	CD40LG
0	1.30392	0.839	0.176	0	0	CD3G
0	1.3029	0.988	0.763	0	0	RPS8
0	1.29978	0.861	0.194	0	0	CD3E
0	1.29437	0.977	0.651	0	0	RPSA
0	1.28947	0.989	0.812	0	0	RPS27A
0	1.28846	0.989	0.757	0	0	RPL3
0	1.27915	0.923	0.542	0	0	RPL36A
0	1.27268	0.994	0.837	0	0	RPL13
0	1.27076	0.991	0.811	0	0	RPL32
0	1.26755	0.989	0.79	0	0	RPS3A
0	1.26428	0.99	0.838	0	0	RPL30
0	1.26398	0.99	0.79	0	0	RPS3
0	1.25088	0.989	0.819	0	0	RPL37
0	1.24548	0.938	0.35	0	0	CD52
0	1.22051	0.992	0.829	0	0	RPL39
0	1.21783	0.873	0.447	0	0	RPL17
0	1.21777	0.966	0.629	0	0	EEF1B2
0	1.21562	0.979	0.696	0	0	RPL5
0	1.21006	0.976	0.662	0	0	RPL10A
0	1.20956	0.421	0.113	0	0	KLRB1
0	1.20658	0.987	0.778	0	0	RPL21
0	1.20434	0.992	0.798	0	0	RPL11
0	1.19417	0.985	0.741	0	0	RPS4X
0	1.18938	0.991	0.805	0	0	RPS28
0	1.17839	0.984	0.735	0	0	RPS25
0	1.16863	0.995	0.86	0	0	RPLP1
0	1.1681	0.577	0.127	0	0	GPR183
0	1.16692	0.692	0.144	0	0	SPOCK2
0	1.16671	0.984	0.744	0	0	RPLP2
0	1.16615	0.966	0.689	0	0	RPL38
0	1.16215	0.989	0.804	0	0	RPS14
0	1.15837	0.981	0.695	0	0	RPL6
0	1.15725	0.987	0.765	0	0	RPL9
0	1.15462	0.991	0.788	0	0	RPS19
0	1.15158	0.994	0.84	0	0	RPL10
0	1.14747	0.578	0.161	0	0	NOSIP
0	1.14704	0.439	0.015	0	0	MAL
0	1.14074	0.994	0.858	0	0	EEF1A1
0	1.13852	0.989	0.78	0	0	RPS23
0	1.13691	0.989	0.778	0	0	RPL18A
0	1.13383	0.799	0.245	0	0	ETS1
0	1.12291	0.984	0.755	0	0	RPS13
0	1.11811	0.984	0.726	0	0	RPL23A
0	1.11546	0.986	0.76	0	0	RPL36
0	1.10757	0.825	0.209	0	0	CD2
0	1.10649	0.972	0.679	0	0	RPL22
0	1.10049	0.983	0.749	0	0	RPL35A
0	1.08072	0.969	0.69	0	0	RPL27
0	1.07923	0.99	0.8	0	0	RPL19
0	1.07841	0.982	0.744	0	0	RPS16
0	1.06762	0.986	0.761	0	0	RPL18
0	1.06016	0.739	0.197	0	0	GIMAP4
0	1.05841	0.994	0.946	0	0	TPT1
0	1.05482	0.985	0.752	0	0	RPL26
0	1.05388	0.981	0.731	0	0	RPL14
0	1.04556	0.519	0.088	0	0	BCL11B
0	1.02399	0.608	0.135	0	0	GIMAP1
0	1.02369	0.994	0.905	0	0	RPL41
0	1.02323	0.991	0.808	0	0	RPS2
0	1.02245	0.889	0.447	0	0	GLTSCR2
0	1.0136	0.943	0.649	0	0	RPS26
0	1.01237	0.977	0.719	0	0	RPL27A
0	0.999794	0.431	0.042	0	0	TRAT1
0	0.987376	0.983	0.741	0	0	RPS7
0	0.985794	0.986	0.774	0	0	RPS15
0	0.980453	0.511	0.133	0	0	RORA
0	0.979378	0.835	0.306	0	0	CD48
0	0.976006	0.983	0.757	0	0	RPL12
0	0.971464	0.835	0.356	0	0	AES
0	0.958023	0.503	0.085	0	0	GIMAP5
0	0.957455	0.982	0.752	0	0	RPL29
0	0.956371	0.441	0.066	0	0	AQP3
0	0.9545	0.958	0.623	0	0	RPLP0
0	0.950762	0.375	0.021	0	0	LEF1
0	0.950321	0.778	0.363	0	0	KLF2
0	0.949056	0.941	0.579	0	0	TOMM7
0	0.948599	0.929	0.541	0	0	TMEM66
0	0.946755	0.977	0.713	0	0	RPL35
0	0.942639	0.718	0.293	0	0	CRIP1
0	0.939414	0.535	0.107	0	0	RCAN3
0	0.937774	0.953	0.587	0	0	RPL4
0	0.909478	0.863	0.277	0	0	PTPRCAP
0	0.899364	0.648	0.209	0	0	PIK3IP1
0	0.899232	0.974	0.695	0	0	RPS5
0	0.897601	0.394	0.04	0	0	TNFRSF25
0	0.89064	0.903	0.515	0	0	RPL31
0	0.887483	0.985	0.752	0	0	RPL7A
0	0.886331	0.746	0.237	0	0	EVL
0	0.8822	0.636	0.161	0	0	LCK
0	0.875015	0.844	0.316	0	0	IL32
0	0.863873	0.646	0.317	0	0	RPS4Y1
0	0.854827	0.492	0.119	0	0	OXNAD1
0	0.85137	0.992	0.871	0	0	RPL28
0	0.851275	0.717	0.254	0	0	LEPROTL1
0	0.84593	0.979	0.74	0	0	RPL37A
0	0.842275	0.382	0.056	0	0	LINC00861
0	0.836294	0.324	0.016	0	0	TRABD2A
0	0.826585	0.41	0.061	0	0	CD6
0	0.825534	0.939	0.579	0	0	NPM1
0	0.824759	0.984	0.848	0	0	RPS9
0	0.824488	0.362	0.086	0	0	GPR171
0	0.82413	0.457	0.094	0	0	ITK
0	0.821079	0.976	0.722	0	0	RPL24
0	0.818372	0.937	0.55	0	0	HNRNPA1
0	0.816383	0.97	0.708	0	0	GNB2L1
0	0.813483	0.67	0.224	0	0	TRAF3IP3
0	0.790067	0.411	0.061	0	0	CAMK4
0	0.783942	0.975	0.731	0	0	NACA
0	0.782643	0.972	0.766	0	0	UBA52
0	0.771671	0.368	0.042	0	0	FLT3LG
0	0.76996	0.675	0.23	0	0	TNFAIP8
0	0.76499	0.984	0.763	0	0	RPL15
0	0.763465	0.903	0.5	0	0	HINT1
0	0.756905	0.7	0.241	0	0	AAK1
0	0.752692	0.404	0.096	0	0	BCL2
0	0.744738	0.75	0.357	0	0	SNHG8
0	0.73858	0.729	0.307	0	0	C12orf57
0	0.737958	0.711	0.233	0	0	ARL4C
0	0.734958	0.895	0.497	0	0	COMMD6
0	0.729435	0.682	0.253	0	0	CD69
0	0.710492	0.383	0.065	0	0	INPP4B
0	0.709109	0.894	0.52	0	0	RPS20
0	0.706888	0.954	0.677	0	0	EEF1D
0	0.702067	0.431	0.102	0	0	TTC39C
0	0.691598	0.571	0.193	0	0	2024-09-06
0	0.682156	0.548	0.18	0	0	SLFN5
0	0.677134	0.982	0.826	0	0	FAU
0	0.676112	0.396	0.077	0	0	THEM4
0	0.675663	0.72	0.33	0	0	NSA2
0	0.673855	0.466	0.104	0	0	CCDC109B
0	0.669048	0.71	0.257	0	0	IFITM1
0	0.66779	0.824	0.423	0	0	EIF3E
0	0.667543	0.973	0.714	0	0	RPL13A
0	0.660257	0.468	0.115	0	0	CD27
0	0.657537	0.485	0.142	0	0	LAT
0	0.656197	0.394	0.079	0	0	DGKA
0	0.649884	0.486	0.149	0	0	2024-09-01
0	0.647138	0.801	0.386	0	0	FXYD5
0	0.644765	0.416	0.141	0	0	AIM1
0	0.642536	0.437	0.13	0	0	TRADD
0	0.641262	0.958	0.66	0	0	BTG1
0	0.630887	0.694	0.313	0	0	UXT
0	0.625631	0.624	0.234	0	0	IKZF1
0	0.624654	0.436	0.13	0	0	CD96
0	0.622594	0.49	0.169	0	0	ITM2A
0	0.615346	0.44	0.148	0	0	RP11-138A9.2
0	0.611416	0.372	0.091	0	0	SATB1
0	0.604083	0.785	0.382	0	0	EIF3F
0	0.60283	0.597	0.219	0	0	ABRACL
0	0.599563	0.932	0.622	0	0	RPL23
0	0.59903	0.418	0.137	0	0	ODF2L
0	0.596921	0.71	0.28	0	0	ACAP1
0	0.595105	0.645	0.283	0	0	SMDT1
0	0.591412	0.933	0.598	0	0	COX7C
0	0.589848	0.301	0.053	0	0	TESPA1
0	0.58857	0.554	0.204	0	0	GYPC
0	0.579052	0.496	0.161	0	0	ARHGAP15
0	0.574095	0.296	0.057	0	0	CDC14A
0	0.573454	0.29	0.05	0	0	TXK
0	0.572624	0.398	0.109	0	0	CLEC2D
0	0.569993	0.345	0.081	0	0	SIT1
0	0.569	0.613	0.22	0	0	RGS10
0	0.56896	0.654	0.306	0	0	PDCD4
0	0.558345	0.696	0.26	0	0	RARRES3
0	0.551195	0.537	0.202	0	0	FYN
0	0.550954	0.782	0.361	0	0	APRT
0	0.550483	0.694	0.277	0	0	LIMD2
0	0.549657	0.336	0.082	0	0	RASGRP1
0	0.545213	0.438	0.134	0	0	MGAT4A
0	0.545049	0.476	0.154	0	0	TMEM243
0	0.54301	0.864	0.408	0	0	CXCR4
0	0.541779	0.952	0.677	0	0	PFDN5
0	0.539306	0.312	0.093	0	0	PTGER2
0	0.538553	0.94	0.64	0	0	RPL7
0	0.537852	0.929	0.603	0	0	BTF3
0	0.537728	0.604	0.219	0	0	TBC1D10C
0	0.536088	0.63	0.265	0	0	PPP1R2
0	0.535678	0.509	0.171	0	0	PSIP1
0	0.53562	0.466	0.167	0	0	SKAP1
0	0.535054	0.75	0.361	0	0	ERP29
0	0.534918	0.294	0.063	0	0	MYC
0	0.532735	0.681	0.313	0	0	GSTK1
0	0.530508	0.319	0.062	0	0	SUSD3
0	0.530274	0.352	0.087	0	0	GIMAP2
0	0.526491	0.59	0.161	0	0	CD247
0	0.525462	0.846	0.455	0	0	EIF3K
0	0.523825	0.989	0.814	0	0	RPS24
0	0.522817	0.746	0.324	0	0	CYTIP
0	0.520963	0.278	0.046	0	0	LDLRAP1
0	0.51943	0.262	0.062	0	0	AC006129.2
0	0.51631	0.707	0.331	0	0	ANP32B
0	0.511054	0.475	0.166	0	0	PBXIP1
0	0.504489	0.455	0.161	0	0	LBH
0	0.500397	0.676	0.298	0	0	CDC42SE2
4.36801e-298	0.65721	0.908	0.56	1.02146e-293	0	ZFP36L2
0	3.15216	0.752	0.106	0	1	KRT19
0	3.04442	0.509	0.09	0	1	LCN2
0	2.52183	0.545	0.051	0	1	C19orf33
0	2.46692	0.67	0.088	0	1	IFI27
0	2.44449	0.355	0.029	0	1	TM4SF4
0	2.40525	0.543	0.088	0	1	MUC1
0	2.39864	0.323	0.027	0	1	MMP7
0	2.34486	0.516	0.069	0	1	TM4SF1
0	2.33474	0.467	0.053	0	1	KRT7
0	2.3293	0.432	0.035	0	1	MSLN
0	2.2568	0.559	0.069	0	1	EPCAM
0	2.2494	0.481	0.061	0	1	ELF3
0	2.2468	0.977	0.816	0	1	S100A6
0	2.19948	0.338	0.044	0	1	DEFB1
0	2.19863	0.529	0.066	0	1	FXYD3
0	2.16467	0.383	0.093	0	1	PMEPA1
0	2.15628	0.422	0.036	0	1	PDZK1IP1
0	2.12505	0.555	0.098	0	1	KRT18
0	2.11471	0.349	0.043	0	1	WFDC2
0	2.10508	0.5	0.07	0	1	CAMK2N1
0	2.03538	0.439	0.039	0	1	MAL2
0	2.03518	0.414	0.048	0	1	CLDN4
0	2.02183	0.542	0.086	0	1	KRT8
0	1.98702	0.37	0.044	0	1	CEACAM6
0	1.96962	0.392	0.035	0	1	GPRC5A
0	1.96754	0.447	0.066	0	1	AGR2
0	1.96388	0.49	0.109	0	1	PERP
0	1.86209	0.388	0.036	0	1	S100A14
0	1.86115	0.351	0.055	0	1	LMO7
0	1.85866	0.439	0.065	0	1	MDK
0	1.84675	0.491	0.162	0	1	ANXA4
0	1.8409	0.448	0.054	0	1	SMIM22
0	1.83218	0.537	0.109	0	1	S100P
0	1.82561	0.559	0.261	0	1	HSPB1
0	1.81307	0.457	0.066	0	1	SLPI
0	1.81026	0.307	0.028	0	1	ITGB4
0	1.80294	0.262	0.03	0	1	PIGR
0	1.79798	0.708	0.357	0	1	ANXA2
0	1.78014	0.518	0.195	0	1	SPINT2
0	1.75809	0.266	0.036	0	1	CLDN10
0	1.74409	0.323	0.032	0	1	LAMB3
0	1.7076	0.363	0.05	0	1	TSPAN8
0	1.70222	0.326	0.04	0	1	S100A16
0	1.69001	0.509	0.204	0	1	CD59
0	1.68499	0.329	0.042	0	1	CYP3A5
0	1.65022	0.327	0.028	0	1	TMC5
0	1.62091	0.37	0.052	0	1	LGALS4
0	1.58264	0.314	0.029	0	1	DSG2
0	1.57725	0.446	0.141	0	1	ATP1B1
0	1.53942	0.267	0.033	0	1	CCND1
0	1.52683	0.33	0.067	0	1	PHLDA2
0	1.51817	0.271	0.04	0	1	TACSTD2
0	1.51755	0.397	0.171	0	1	TMEM238
0	1.51172	0.705	0.443	0	1	GSTP1
0	1.50244	0.293	0.033	0	1	TMEM54
0	1.47989	0.359	0.121	0	1	FAM3C
0	1.4635	0.293	0.056	0	1	H1F0
0	1.4535	0.3	0.064	0	1	DST
0	1.44937	0.337	0.052	0	1	SERINC2
0	1.44695	0.287	0.038	0	1	KLF5
0	1.42975	0.333	0.048	0	1	CTTN
0	1.41758	0.31	0.045	0	1	CLDN7
0	1.41617	0.675	0.344	0	1	LGALS3
0	1.40891	0.711	0.564	0	1	PPDPF
0	1.40831	0.362	0.13	0	1	SPTBN1
0	1.3874	0.509	0.22	0	1	CYSTM1
0	1.38316	0.382	0.121	0	1	CD151
0	1.38173	0.278	0.065	0	1	LGALS3BP
0	1.37911	0.25	0.032	0	1	RP11-462G2.1
0	1.36224	0.34	0.094	0	1	RRAS
0	1.35665	0.268	0.045	0	1	SDC1
0	1.35035	0.288	0.049	0	1	SDC4
0	1.32745	0.271	0.035	0	1	EPS8
0	1.27762	0.353	0.053	0	1	TFF2
0	1.26877	0.295	0.078	0	1	LSR
0	1.25385	0.293	0.062	0	1	S100A13
0	1.22893	0.321	0.103	0	1	TSPAN3
0	1.20444	0.365	0.126	0	1	TSC22D1
0	1.17701	0.43	0.142	0	1	TPM1
0	1.16676	0.26	0.052	0	1	MGLL
0	1.13617	0.251	0.032	0	1	JUP
0	1.08302	0.278	0.069	0	1	ADAM9
9.53192e-303	1.10147	0.305	0.099	2.22904e-298	1	APP
2.16649e-301	0.845051	0.912	0.794	5.06634e-297	1	RPL8
3.20414e-289	1.07881	0.377	0.148	7.49289e-285	1	LMNA
2.58143e-283	1.43078	0.286	0.093	6.03667e-279	1	SLC40A1
3.80454e-277	1.06116	0.295	0.1	8.89692e-273	1	SPATS2L
2.2653e-275	0.765047	0.311	0.101	5.2974e-271	1	C15orf48
3.67927e-272	1.36654	0.287	0.095	8.60398e-268	1	SOX4
6.87672e-270	1.41266	0.856	0.925	1.60812e-265	1	MT-ND2
4.92429e-263	0.664361	0.963	0.876	1.15154e-258	1	RPL28
1.34652e-253	1.28698	0.522	0.333	3.14884e-249	1	DSTN
1.35555e-250	1.17324	0.356	0.15	3.16995e-246	1	MARCKSL1
1.48821e-241	0.732881	0.621	0.36	3.48018e-237	1	CST3
2.83526e-240	1.16657	0.321	0.13	6.63025e-236	1	TMBIM1
2.00195e-236	1.0002	0.28	0.1	4.68155e-232	1	CTNNA1
3.25296e-236	1.08118	0.522	0.291	7.60706e-232	1	APLP2
1.08429e-233	1.33647	0.618	0.507	2.53561e-229	1	GUK1
2.11589e-227	1.22703	0.371	0.177	4.94801e-223	1	CAPN2
1.48482e-217	0.719422	0.85	0.745	3.47224e-213	1	S100A11
2.17015e-214	0.910085	0.411	0.194	5.07491e-210	1	IFITM3
3.33798e-212	1.19579	0.693	0.562	7.80587e-208	1	S100A10
4.6182e-204	1.1195	0.61	0.479	1.07997e-199	1	GPX4
5.54324e-203	1.04956	0.267	0.105	1.29629e-198	1	SH3YL1
1.79281e-202	0.863786	0.831	0.736	4.19249e-198	1	RPL13A
4.48333e-199	1.04057	0.261	0.101	1.04843e-194	1	ARHGAP5
1.39179e-174	1.34315	0.423	0.265	3.2547e-170	1	OCIAD2
3.51319e-172	0.73042	0.838	0.716	8.21559e-168	1	RPS5
7.42584e-164	0.990197	0.335	0.171	1.73653e-159	1	RHOC
7.86643e-157	0.685533	0.918	0.863	1.83956e-152	1	TMSB10
7.25933e-151	0.68027	0.393	0.201	1.69759e-146	1	CD9
8.36108e-150	1.11354	0.285	0.138	1.95524e-145	1	PLA2G16
3.19063e-144	1.04622	0.278	0.127	7.46128e-140	1	VEGFA
8.59173e-144	0.983657	0.533	0.404	2.00918e-139	1	SQSTM1
1.23007e-135	1.26562	0.612	0.587	2.87653e-131	1	ZFAS1
8.31983e-133	0.940434	0.28	0.139	1.94559e-128	1	ARPC1A
3.05329e-130	0.892375	0.616	0.572	7.14011e-126	1	TCEB2
2.59559e-129	1.0895	0.285	0.147	6.06979e-125	1	PLEC
5.36238e-129	0.859194	0.312	0.162	1.25399e-124	1	YBX3
8.02916e-129	1.0665	0.591	0.543	1.87762e-124	1	EIF4A2
8.78469e-129	0.620793	0.473	0.314	2.0543e-124	1	TIMP1
9.08509e-129	0.62232	0.816	0.762	2.12455e-124	1	RPS11
4.6134e-128	0.760285	0.265	0.12	1.07884e-123	1	CLU
4.80995e-126	1.22251	0.308	0.17	1.12481e-121	1	C12orf75
6.46763e-122	0.932098	0.317	0.175	1.51246e-117	1	PTTG1IP
9.87006e-115	0.979812	0.434	0.306	2.30811e-110	1	CANX
3.23198e-114	1.06906	0.269	0.141	7.55799e-110	1	HMGA1
2.39888e-110	0.97038	0.479	0.369	5.60978e-106	1	PRDX5
2.46218e-107	0.664624	0.302	0.162	5.75782e-103	1	BLVRB
4.16519e-106	1.18088	0.339	0.216	9.74029e-102	1	CLTB
3.23161e-105	1.03612	0.396	0.275	7.55711e-101	1	EZR
1.99927e-104	0.928802	0.458	0.33	4.67529e-100	1	ITGB1
6.2285e-102	0.574039	0.786	0.78	1.45654e-97	1	GAPDH
5.54538e-101	0.853975	0.52	0.418	1.29679e-96	1	PRDX1
6.3787e-101	0.928724	0.342	0.209	1.49166e-96	1	ERO1L
6.91487e-101	0.928039	0.324	0.197	1.61704e-96	1	H2AFJ
1.51403e-99	0.890329	0.351	0.224	3.54056e-95	1	TM9SF3
7.96086e-92	0.991379	0.437	0.349	1.86165e-87	1	SEPW1
5.00901e-89	0.978223	0.368	0.254	1.17136e-84	1	ATP1A1
2.00782e-86	0.945006	0.377	0.267	4.69528e-82	1	VDAC1
2.33224e-86	0.75418	0.563	0.492	5.45394e-82	1	RAC1
1.26061e-84	0.876453	0.542	0.479	2.94793e-80	1	LDHA
2.10166e-81	0.856977	0.397	0.293	4.91473e-77	1	ARL6IP1
5.09341e-80	0.722623	0.536	0.47	1.19109e-75	1	TXN
5.79488e-76	0.762329	0.434	0.331	1.35513e-71	1	LAPTM4A
3.8801e-73	0.58473	0.655	0.585	9.07362e-69	1	CD63
7.55074e-72	0.933638	0.393	0.298	1.76574e-67	1	LY6E
2.73624e-71	0.865305	0.45	0.358	6.39871e-67	1	PKM
4.80507e-71	0.936914	0.297	0.193	1.12366e-66	1	IFI6
2.34189e-70	0.811572	0.333	0.233	5.4765e-66	1	RHEB
5.25218e-70	0.725454	0.345	0.238	1.22822e-65	1	HSBP1
1.31616e-68	0.843315	0.384	0.285	3.07783e-64	1	HN1
2.7695e-68	1.69768	0.579	0.561	6.47648e-64	1	HSP90AB1
1.51413e-67	0.811325	0.282	0.178	3.5408e-63	1	ABHD2
1.84685e-66	0.745876	0.346	0.245	4.31887e-62	1	KDELR2
2.81277e-63	0.525948	0.683	0.677	6.57767e-59	1	RPL7
1.32899e-62	0.819626	0.329	0.231	3.10783e-58	1	LINC00657
1.60073e-62	0.828643	0.736	0.789	3.7433e-58	1	MT-ND5
2.45875e-61	0.739131	0.589	0.605	5.74979e-57	1	CHCHD2
5.94139e-61	0.995348	0.392	0.326	1.38939e-56	1	DYNLRB1
1.33802e-59	0.756432	0.284	0.187	3.12896e-55	1	HDLBP
1.14793e-58	0.765989	0.274	0.181	2.68444e-54	1	SYPL1
3.49785e-56	0.719678	0.305	0.213	8.17973e-52	1	KDELR1
4.52592e-56	0.84046	0.392	0.32	1.05839e-51	1	HSPD1
1.90552e-55	0.721142	0.259	0.17	4.45606e-51	1	UBE2H
2.16989e-54	0.676429	0.616	0.655	5.07429e-50	1	MYL12B
3.87212e-54	0.869575	0.426	0.378	9.05495e-50	1	UQCRQ
1.80531e-52	0.698839	0.587	0.605	4.22173e-48	1	CALM2
2.26363e-51	0.639464	0.279	0.19	5.29349e-47	1	RIOK3
4.2338e-51	0.787841	0.338	0.258	9.90074e-47	1	PPA1
1.48461e-48	0.7389	0.348	0.268	3.47177e-44	1	CTNNB1
1.08998e-46	0.771607	0.3	0.223	2.54892e-42	1	ARF4
1.37535e-45	0.577779	0.574	0.548	3.21625e-41	1	HINT1
1.5867e-44	0.525547	0.618	0.621	3.7105e-40	1	PPIA
1.82335e-44	0.897238	0.438	0.417	4.26391e-40	1	TOMM20
2.8426e-44	0.724393	0.53	0.538	6.64742e-40	1	SKP1
9.56852e-44	0.84211	0.449	0.422	2.2376e-39	1	SEC61G
1.67718e-43	0.531615	0.624	0.655	3.92208e-39	1	ALDOA
9.45012e-41	0.759009	0.325	0.256	2.20991e-36	1	TMED10
3.9313e-40	0.659853	0.403	0.338	9.19334e-36	1	P4HB
4.07455e-40	0.664897	0.389	0.325	9.52835e-36	1	ACTN4
5.93056e-40	0.76792	0.455	0.418	1.38686e-35	1	RPS27L
9.73732e-39	0.803649	0.355	0.306	2.27707e-34	1	VDAC2
1.1416e-37	0.767424	0.289	0.224	2.66964e-33	1	ETFB
3.37207e-37	0.716408	0.389	0.336	7.88559e-33	1	CHMP2A
1.6002e-35	0.866208	0.315	0.258	3.74206e-31	1	PFDN2
1.43049e-34	0.777373	0.305	0.25	3.3452e-30	1	SBDS
2.84161e-34	0.838834	0.409	0.365	6.64511e-30	1	HSPA5
4.08374e-33	0.703109	0.848	0.955	9.54983e-29	1	MT-ND4
7.30303e-32	0.723926	0.308	0.249	1.70781e-27	1	PPP1R14B
5.66646e-31	0.562052	0.252	0.187	1.3251e-26	1	RAB11A
4.34572e-30	0.819751	0.361	0.323	1.01625e-25	1	SRI
1.34249e-29	0.734642	0.313	0.261	3.13941e-25	1	TRAM1
7.17097e-29	0.732791	0.391	0.366	1.67693e-24	1	SHFM1
1.09726e-28	0.62193	0.857	0.944	2.56595e-24	1	MT-CO1
1.32137e-28	0.599537	0.279	0.22	3.09003e-24	1	C1orf43
5.80491e-28	0.684051	0.349	0.308	1.35748e-23	1	CLTA
6.90699e-28	0.638698	0.298	0.24	1.6152e-23	1	C19orf10
3.42737e-27	0.592445	0.275	0.219	8.0149e-23	1	MORF4L2
1.87962e-26	0.576126	0.644	0.663	4.3955e-22	1	RPL23
2.33833e-26	0.551978	0.473	0.431	5.46819e-22	1	VMP1
4.77268e-25	0.520838	0.531	0.533	1.11609e-20	1	TSPO
2.86754e-23	0.621256	0.329	0.285	6.70575e-19	1	KIF5B
6.27567e-23	0.643253	0.251	0.203	1.46756e-18	1	HSPA9
5.65947e-22	0.683299	0.277	0.232	1.32347e-17	1	ANAPC11
7.75546e-22	0.620992	0.356	0.323	1.81361e-17	1	MGST3
1.87959e-21	0.715213	0.321	0.287	4.39543e-17	1	CMPK1
9.23566e-21	0.744865	0.428	0.437	2.15976e-16	1	POLR2L
1.43684e-20	0.593208	0.276	0.233	3.36006e-16	1	BUD31
6.71615e-20	0.639631	0.433	0.424	1.57057e-15	1	HSPE1
9.4245e-20	0.53897	0.52	0.547	2.20392e-15	1	YWHAZ
7.00593e-19	0.568914	0.319	0.282	1.63834e-14	1	ZNHIT1
1.66798e-18	0.605868	0.253	0.212	3.90057e-14	1	UFM1
4.90232e-18	0.508357	0.296	0.253	1.14641e-13	1	LENG8
8.83084e-18	0.546903	0.321	0.287	2.06509e-13	1	SSR3
1.67639e-17	0.581817	0.274	0.239	3.92024e-13	1	SLIRP
1.75688e-17	0.576389	0.347	0.32	4.10845e-13	1	POLD4
2.02708e-17	0.676538	0.345	0.33	4.74034e-13	1	FIS1
2.63726e-17	0.538349	0.449	0.471	6.16724e-13	1	TMEM258
3.4782e-17	0.531535	0.483	0.511	8.13376e-13	1	COX5B
1.11298e-16	0.612989	0.258	0.223	2.60271e-12	1	POLR2K
1.62557e-16	0.597606	0.264	0.226	3.8014e-12	1	VIMP
9.44448e-16	0.557175	0.361	0.34	2.20859e-11	1	YWHAE
1.30172e-15	0.55948	0.279	0.241	3.04407e-11	1	GOLGB1
5.20546e-15	0.620662	0.28	0.251	1.2173e-10	1	MRPL52
3.6734e-14	0.592211	0.38	0.378	8.59024e-10	1	TBCA
5.11759e-14	0.575193	0.276	0.248	1.19675e-09	1	MRPL41
1.24935e-13	0.505452	0.33	0.308	2.9216e-09	1	TAX1BP1
2.72319e-13	0.606545	0.322	0.302	6.36819e-09	1	PDIA6
1.81862e-12	0.603966	0.33	0.321	4.25283e-08	1	SF3B14
2.02189e-12	0.508201	0.637	0.703	4.72819e-08	1	MYL12A
2.82565e-12	0.57862	0.419	0.444	6.60779e-08	1	ARF1
3.41525e-12	0.538885	0.481	0.53	7.98656e-08	1	EDF1
4.29774e-11	0.514073	0.288	0.268	1.00503e-06	1	ROMO1
1.32384e-10	0.641761	0.413	0.434	3.09579e-06	1	SOD1
3.05989e-10	0.57742	0.407	0.426	7.15555e-06	1	TRMT112
5.15014e-10	0.525026	0.437	0.48	1.20436e-05	1	USMG5
1.12893e-09	0.524115	0.329	0.313	2.64001e-05	1	SYNE2
2.06286e-08	0.572644	0.356	0.362	0.0004824	1	TAF1D
2.08454e-08	0.53961	0.302	0.295	0.000487469	1	RNF7
9.37632e-08	0.555197	0.428	0.47	0.00219265	1	SAP18
1.38753e-07	0.512745	0.343	0.351	0.00324473	1	ST13
8.66549e-07	0.501259	0.299	0.294	0.0202643	1	EIF1AX
1.10283e-06	0.50817	0.284	0.278	0.0257897	1	CYCS
1.49802e-06	0.526298	0.26	0.25	0.0350312	1	SNRPE
1.52224e-06	0.539498	0.409	0.446	0.0355976	1	DAD1
1.04095e-05	0.615046	0.323	0.331	0.243425	1	MT-ATP8
8.57325e-05	0.651845	0.279	0.285	1	1	SLC3A2
0.000321507	0.505358	0.317	0.33	1	1	NDUFB7
0.00210394	0.513016	0.277	0.286	1	1	TMCO1
0.002943	0.507785	0.312	0.335	1	1	PSMD8
0	3.90413	0.525	0.117	0	2	IL8
0	3.37849	0.902	0.142	0	2	CSF3R
0	3.1903	0.94	0.249	0	2	NAMPT
0	3.16159	0.824	0.214	0	2	SLC25A37
0	3.13547	0.994	0.788	0	2	NEAT1
0	3.00189	0.68	0.109	0	2	G0S2
0	2.83384	0.56	0.064	0	2	CXCR2
0	2.82626	0.808	0.252	0	2	SORL1
0	2.82258	0.732	0.078	0	2	FCGR3B
0	2.79059	0.839	0.32	0	2	SOD2
0	2.78855	0.492	0.095	0	2	PTGS2
0	2.72803	0.913	0.57	0	2	FOS
0	2.68904	0.832	0.364	0	2	LITAF
0	2.67615	0.772	0.167	0	2	MXD1
0	2.62337	0.745	0.296	0	2	NABP1
0	2.62212	0.657	0.091	0	2	FPR1
0	2.58096	0.771	0.248	0	2	MYO1F
0	2.55522	0.692	0.461	0	2	IFITM2
0	2.5455	0.837	0.551	0	2	DUSP1
0	2.50426	0.65	0.168	0	2	BCL2A1
0	2.45145	0.598	0.167	0	2	BASP1
0	2.41917	0.405	0.067	0	2	IL1B
0	2.41283	0.738	0.268	0	2	RGS2
0	2.39431	0.665	0.147	0	2	MNDA
0	2.38647	0.515	0.231	0	2	IVNS1ABP
0	2.32678	0.678	0.263	0	2	FAM65B
0	2.31161	0.708	0.257	0	2	RNF149
0	2.30927	0.56	0.208	0	2	FAM129A
0	2.28766	0.552	0.089	0	2	LRRK2
0	2.25857	0.595	0.191	0	2	SEC14L1
0	2.25726	0.838	0.474	0	2	MCL1
0	2.25712	0.56	0.11	0	2	ITGAX
0	2.25686	0.376	0.055	0	2	IL1R2
0	2.23574	0.551	0.08	0	2	AQP9
0	2.19351	0.583	0.176	0	2	TMEM154
0	2.19174	0.545	0.133	0	2	BCL6
0	2.16974	0.772	0.418	0	2	SMCHD1
0	2.16405	0.827	0.615	0	2	SRGN
0	2.15759	0.917	0.648	0	2	SAT1
0	2.13669	0.377	0.066	0	2	ARHGEF40
0	2.13627	0.499	0.066	0	2	MMP25
0	2.13198	0.563	0.124	0	2	FCGR2A
0	2.1306	0.605	0.238	0	2	IER3
0	2.11273	0.459	0.101	0	2	DOCK5
0	2.10115	0.589	0.17	0	2	GCA
0	2.0921	0.642	0.148	0	2	SLC11A1
0	2.08462	0.53	0.123	0	2	TNFAIP2
0	2.08067	0.57	0.158	0	2	MBOAT7
0	2.07399	0.609	0.125	0	2	NCF2
0	2.07315	0.495	0.095	0	2	RNF24
0	2.07296	0.518	0.113	0	2	ACSL1
0	2.0727	0.5	0.096	0	2	C5AR1
0	2.07148	0.561	0.175	0	2	KDM6B
0	2.06738	0.379	0.04	0	2	FFAR2
0	2.06055	0.461	0.095	0	2	DENND3
0	2.04317	0.296	0.034	0	2	LUCAT1
0	2.03274	0.702	0.294	0	2	NCF1
0	2.02622	0.721	0.412	0	2	CEBPB
0	2.01857	0.52	0.188	0	2	R3HDM4
0	2.01425	0.656	0.197	0	2	SERPINA1
0	2.00248	0.564	0.175	0	2	ABTB1
0	1.9925	0.465	0.122	0	2	ATG16L2
0	1.988	0.531	0.299	0	2	SLC2A3
0	1.98473	0.559	0.333	0	2	IRF1
0	1.97798	0.505	0.206	0	2	LYST
0	1.97398	0.454	0.067	0	2	LILRB3
0	1.95984	0.421	0.056	0	2	CMTM2
0	1.95903	0.37	0.056	0	2	STEAP4
0	1.94391	0.481	0.14	0	2	XPO6
0	1.93912	0.53	0.152	0	2	LYN
0	1.93372	0.547	0.261	0	2	CD97
0	1.93031	0.385	0.044	0	2	CXCR1
0	1.92152	0.678	0.18	0	2	S100A8
0	1.91766	0.706	0.347	0	2	GLUL
0	1.90991	0.416	0.065	0	2	CLEC4E
0	1.90858	0.596	0.279	0	2	C10orf54
0	1.90575	0.511	0.156	0	2	PHC2
0	1.89536	0.536	0.191	0	2	AMICA1
0	1.89353	0.541	0.158	0	2	SPI1
0	1.89196	0.621	0.186	0	2	LST1
0	1.87943	0.592	0.375	0	2	FOSB
0	1.86075	0.617	0.373	0	2	BTG2
0	1.84185	0.713	0.412	0	2	SDCBP
0	1.84175	0.38	0.065	0	2	CREB5
0	1.83407	0.737	0.232	0	2	S100A9
0	1.83248	0.398	0.061	0	2	APOBEC3A
0	1.82995	0.354	0.057	0	2	TREM1
0	1.82073	0.621	0.305	0	2	VASP
0	1.81478	0.474	0.206	0	2	EGR1
0	1.8142	0.725	0.508	0	2	ZFP36L1
0	1.81081	0.292	0.032	0	2	HCAR3
0	1.80975	0.411	0.079	0	2	PTAFR
0	1.80358	0.551	0.271	0	2	FMNL1
0	1.80323	0.416	0.113	0	2	SLC6A6
0	1.80206	0.418	0.113	0	2	ARHGAP26
0	1.7836	0.413	0.138	0	2	LINC00936
0	1.78277	0.377	0.13	0	2	FAM126B
0	1.78119	0.433	0.144	0	2	CYTH4
0	1.76409	0.416	0.083	0	2	RP11-290F20.3
0	1.76274	0.4	0.092	0	2	CLEC7A
0	1.76265	0.654	0.419	0	2	CFLAR
0	1.7604	0.326	0.056	0	2	EMR2
0	1.7586	0.618	0.358	0	2	FYB
0	1.75441	0.426	0.116	0	2	IL6R
0	1.75078	0.764	0.535	0	2	IER2
0	1.74681	0.36	0.06	0	2	AL627309.1
0	1.73901	0.345	0.047	0	2	KCNJ15
0	1.73626	0.676	0.51	0	2	NFKBIA
0	1.72817	0.415	0.106	0	2	FGR
0	1.72695	0.603	0.372	0	2	SMAP2
0	1.72219	0.394	0.091	0	2	ZDHHC18
0	1.71646	0.423	0.16	0	2	SHKBP1
0	1.7157	0.347	0.06	0	2	TLR2
0	1.71447	0.487	0.184	0	2	PLAUR
0	1.70913	0.327	0.042	0	2	FPR2
0	1.70877	0.293	0.03	0	2	KCNJ2
0	1.70649	0.412	0.131	0	2	STX3
0	1.70528	0.415	0.08	0	2	HCK
0	1.70264	0.555	0.311	0	2	USP15
0	1.69746	0.341	0.047	0	2	GPR97
0	1.69163	0.267	0.051	0	2	IL1RAP
0	1.69145	0.642	0.404	0	2	KIAA1551
0	1.69067	0.371	0.07	0	2	CSF2RB
0	1.68812	0.358	0.075	0	2	SLC43A2
0	1.68172	0.359	0.117	0	2	PELI1
0	1.68089	0.619	0.388	0	2	YPEL3
0	1.6753	0.386	0.094	0	2	PLXNC1
0	1.67282	0.468	0.194	0	2	SELL
0	1.67107	0.578	0.303	0	2	CMTM6
0	1.66818	0.421	0.185	0	2	MIR24-2
0	1.6653	0.398	0.099	0	2	MSRB1
0	1.65787	0.33	0.077	0	2	GK
0	1.6562	0.31	0.042	0	2	P2RY13
0	1.65522	0.368	0.116	0	2	TET2
0	1.65466	0.493	0.202	0	2	SLC16A3
0	1.64859	0.388	0.162	0	2	ZCCHC6
0	1.64624	0.531	0.262	0	2	CEBPD
0	1.64355	0.537	0.249	0	2	TNFRSF1B
0	1.63849	0.274	0.032	0	2	ALPL
0	1.62713	0.347	0.076	0	2	CPPED1
0	1.6258	0.428	0.152	0	2	NCF4
0	1.62387	0.275	0.043	0	2	PROK2
0	1.61531	0.442	0.148	0	2	ATP6V1B2
0	1.61093	0.389	0.106	0	2	RASSF2
0	1.60958	0.394	0.168	0	2	SSH2
0	1.60107	0.398	0.127	0	2	MX2
0	1.60097	0.412	0.124	0	2	IL17RA
0	1.59901	0.389	0.14	0	2	TLE3
0	1.59505	0.423	0.135	0	2	ACTN1
0	1.59328	0.43	0.156	0	2	NUMB
0	1.58747	0.498	0.229	0	2	RAB11FIP1
0	1.54856	0.375	0.103	0	2	NADK
0	1.54371	0.394	0.148	0	2	IGF2R
0	1.53612	0.286	0.046	0	2	LRG1
0	1.53351	0.271	0.058	0	2	DPEP2
0	1.52726	0.793	0.858	0	2	H3F3A
0	1.51632	0.284	0.036	0	2	LINC01001
0	1.51289	0.3	0.065	0	2	LIMK2
0	1.50968	0.413	0.173	0	2	PREX1
0	1.50254	0.397	0.156	0	2	PTPRE
0	1.49224	0.268	0.042	0	2	HRH2
0	1.48675	0.598	0.374	0	2	CD55
0	1.48376	0.306	0.08	0	2	APOBR
0	1.48267	0.375	0.149	0	2	MSL1
0	1.47792	0.813	0.715	0	2	TXNIP
0	1.46027	0.332	0.074	0	2	PYGL
0	1.45592	0.847	0.737	0	2	HLA-E
0	1.44745	0.745	0.579	0	2	PTPRC
0	1.43631	0.382	0.146	0	2	PLEK
0	1.42055	0.276	0.04	0	2	SECTM1
0	1.41052	0.334	0.069	0	2	IGSF6
0	1.40195	0.332	0.077	0	2	VNN2
0	1.40018	0.321	0.076	0	2	SIRPA
0	1.39667	0.824	0.647	0	2	JUNB
0	1.39048	0.586	0.332	0	2	TYMP
0	1.38753	0.751	0.568	0	2	TSC22D3
0	1.38537	0.31	0.09	0	2	RXRA
0	1.35501	0.273	0.036	0	2	DGAT2
0	1.31863	0.25	0.046	0	2	MME
0	1.31753	0.266	0.062	0	2	CHST15
0	1.29557	0.314	0.095	0	2	MEGF9
0	1.28743	0.268	0.063	0	2	DOK3
0	1.22901	0.257	0.055	0	2	LRRC25
0	1.11911	0.976	0.965	0	2	FTH1
0	1.10279	0.884	0.862	0	2	HLA-B
0	1.03092	0.846	0.843	0	2	H3F3B
2.21205e-307	1.42586	0.591	0.383	5.17287e-303	2	LSP1
2.95071e-307	1.56028	0.479	0.248	6.90023e-303	2	PTEN
2.41415e-306	1.48383	0.351	0.129	5.6455e-302	2	OGFRL1
2.49111e-305	1.67642	0.435	0.193	5.82546e-301	2	MARCKS
1.69881e-304	1.47244	0.47	0.237	3.97266e-300	2	ARRB2
2.19257e-302	1.47468	0.391	0.163	5.12733e-298	2	ADAM8
1.86567e-300	1.02832	0.63	0.334	4.36287e-296	2	TYROBP
4.90004e-300	1.33869	0.301	0.098	1.14587e-295	2	FRAT2
2.66098e-299	1.63546	0.342	0.127	6.2227e-295	2	CPD
2.55397e-298	1.48061	0.544	0.33	5.97246e-294	2	EVI2B
4.12094e-296	1.33336	0.355	0.134	9.63681e-292	2	FBXL5
2.02321e-295	1.56006	0.461	0.234	4.73127e-291	2	MIDN
3.04879e-294	1.32165	0.295	0.094	7.12959e-290	2	PDLIM7
5.79601e-294	1.43606	0.664	0.514	1.3554e-289	2	ZFP36
5.45385e-293	1.32163	0.316	0.109	1.27538e-288	2	ARAP1
8.88815e-288	0.716693	0.998	0.974	2.07849e-283	2	MALAT1
4.08569e-287	1.52409	0.328	0.122	9.55438e-283	2	FAM53C
2.69389e-286	1.38869	0.26	0.078	6.29967e-282	2	CAMK1D
2.31447e-285	1.18052	0.279	0.084	5.4124e-281	2	RAB31
6.22164e-282	1.35581	0.29	0.095	1.45493e-277	2	TRIM25
1.87725e-280	1.47865	0.426	0.205	4.38996e-276	2	CNN2
1.0124e-279	0.897499	0.277	0.084	2.3675e-275	2	HSPA6
1.31999e-276	1.2791	0.29	0.094	3.08681e-272	2	RBM47
1.70534e-275	1.36717	0.26	0.08	3.98794e-271	2	SLC15A4
1.2957e-273	1.28437	0.607	0.416	3.02999e-269	2	VMP1
3.29141e-273	1.45297	0.296	0.099	7.69697e-269	2	ADM
7.236e-272	1.47937	0.526	0.336	1.69214e-267	2	STAT3
2.52312e-268	1.59568	0.344	0.141	5.90032e-264	2	RAF1
1.45957e-267	1.41613	0.425	0.206	3.4132e-263	2	SKAP2
1.12151e-266	1.374	0.324	0.124	2.62265e-262	2	OAZ2
2.38178e-263	1.26461	0.317	0.113	5.56979e-259	2	TNFSF13B
9.03411e-262	1.47087	0.387	0.179	2.11263e-257	2	ARHGAP9
7.07151e-261	1.3889	0.315	0.118	1.65367e-256	2	NBEAL2
4.73635e-260	1.31198	0.33	0.128	1.10759e-255	2	DDX60L
7.80156e-258	1.28714	0.32	0.121	1.82439e-253	2	SNX10
1.91375e-250	1.4454	0.362	0.16	4.4753e-246	2	ERGIC1
5.98135e-248	1.25325	0.622	0.477	1.39874e-243	2	LCP1
6.49261e-246	1.27125	0.652	0.538	1.5183e-241	2	LAPTM5
1.04468e-245	1.34532	0.402	0.195	2.44299e-241	2	PICALM
1.59295e-244	1.41552	0.332	0.139	3.72512e-240	2	RYBP
3.75753e-244	1.24306	0.795	0.809	8.78699e-240	2	HLA-C
6.62254e-241	1.32919	0.323	0.131	1.54868e-236	2	FLOT2
6.17431e-237	1.43923	0.273	0.097	1.44386e-232	2	ABHD5
3.99987e-236	1.3891	0.504	0.323	9.3537e-232	2	HCLS1
1.02919e-235	1.5137	0.493	0.307	2.40677e-231	2	SLA
4.03928e-235	1.31029	0.718	0.786	9.44585e-231	2	ITM2B
6.4394e-235	1.31886	0.523	0.33	1.50585e-230	2	EFHD2
1.41966e-234	1.31848	0.356	0.161	3.31988e-230	2	RASSF3
7.97739e-234	1.44761	0.516	0.341	1.86551e-229	2	BOD1L1
2.80959e-232	1.15205	0.298	0.113	6.57023e-228	2	THEMIS2
2.20567e-230	1.12531	0.606	0.423	5.15795e-226	2	CTSS
1.31214e-227	1.41939	0.492	0.314	3.06843e-223	2	WIPF1
4.79012e-226	1.24195	0.312	0.127	1.12017e-221	2	PXN
5.66562e-225	1.23934	0.256	0.089	1.3249e-220	2	ECE1
2.72948e-223	1.34458	0.583	0.448	6.38288e-219	2	LRRFIP1
2.89637e-223	1.44669	0.484	0.309	6.77316e-219	2	MBP
7.06753e-219	0.913517	0.416	0.19	1.65274e-214	2	AIF1
1.70863e-217	1.33257	0.318	0.134	3.99564e-213	2	IRS2
3.66105e-217	1.20665	0.255	0.091	8.56136e-213	2	PBX2
4.876e-217	1.67084	0.576	0.47	1.14025e-212	2	TAGLN2
7.67953e-215	1.35367	0.452	0.269	1.79586e-210	2	RHOG
1.13951e-214	1.20561	0.345	0.157	2.66475e-210	2	TNFRSF1A
7.8307e-212	1.35933	0.533	0.373	1.83121e-207	2	TALDO1
2.19473e-211	1.26919	0.385	0.194	5.13239e-207	2	ZYX
3.37203e-211	1.42492	0.358	0.172	7.88548e-207	2	BAZ2B
3.52467e-209	1.39779	0.563	0.408	8.24245e-205	2	ATP6V0B
1.00113e-208	1.4222	0.372	0.189	2.34114e-204	2	FLOT1
2.59064e-207	1.35533	0.444	0.263	6.05821e-203	2	ADAR
1.41174e-206	1.36524	0.425	0.242	3.30135e-202	2	LRP10
1.06579e-205	1.27763	0.307	0.132	2.49235e-201	2	RPS6KA1
5.12575e-203	1.43572	0.286	0.12	1.19866e-198	2	PLK3
4.77087e-202	1.45378	0.369	0.189	1.11567e-197	2	SPAG9
1.44335e-199	0.560598	0.078	0.355	3.37528e-195	2	MT2A
7.74854e-199	1.12538	0.252	0.092	1.812e-194	2	SYK
1.01236e-197	1.31227	0.317	0.143	2.3674e-193	2	EHBP1L1
7.56076e-197	1.11293	0.298	0.125	1.76808e-192	2	UBE2D1
3.89324e-196	1.29505	0.505	0.351	9.10435e-192	2	DAZAP2
1.61446e-195	1.36711	0.514	0.373	3.77541e-191	2	ICAM3
8.15291e-191	1.20512	0.546	0.407	1.90656e-186	2	IQGAP1
1.33591e-189	1.29327	0.412	0.235	3.12403e-185	2	TCIRG1
4.66149e-189	1.09388	0.645	0.538	1.09009e-184	2	KLF6
9.38415e-189	1.26291	0.297	0.132	2.19448e-184	2	STAT5B
4.31887e-185	1.20147	0.276	0.113	1.00997e-180	2	ETS2
2.62197e-184	1.52415	0.298	0.134	6.13147e-180	2	MIR142
6.16681e-183	1.2746	0.298	0.134	1.44211e-178	2	STAT6
1.78208e-181	1.30359	0.318	0.149	4.1674e-177	2	ATHL1
6.11902e-180	1.44945	0.395	0.229	1.43093e-175	2	MAP3K2
1.01794e-177	1.54606	0.445	0.292	2.38045e-173	2	MGEA5
1.48631e-176	1.07765	0.277	0.118	3.47572e-172	2	RALB
2.33346e-176	1.17638	0.253	0.103	5.45679e-172	2	CEP63
3.19426e-176	1.03292	0.289	0.12	7.46978e-172	2	CFD
6.02771e-175	1.50876	0.433	0.281	1.40958e-170	2	CREBRF
9.80503e-172	0.706411	0.808	0.837	2.29291e-167	2	HLA-A
2.9679e-170	1.18894	0.281	0.126	6.94043e-166	2	NCOA1
3.09763e-170	1.08541	0.57	0.442	7.24382e-166	2	COTL1
9.10178e-169	1.07112	0.295	0.132	2.12845e-164	2	ALOX5
4.28076e-167	1.29832	0.386	0.227	1.00106e-162	2	SP110
1.55936e-164	1.27001	0.395	0.238	3.64656e-160	2	ACAP2
1.59041e-164	1.17608	0.291	0.137	3.71918e-160	2	SLC44A2
1.23407e-161	1.01288	0.262	0.111	2.88588e-157	2	LY96
1.38954e-161	1.24559	0.461	0.323	3.24945e-157	2	FAM49B
4.16451e-161	1.27564	0.347	0.188	9.73871e-157	2	RNF13
6.9791e-161	1.24239	0.36	0.202	1.63206e-156	2	UBE2R2
7.03774e-160	1.2072	0.449	0.301	1.64578e-155	2	GNB2
8.89775e-160	1.15408	0.254	0.109	2.08074e-155	2	PIK3CD
1.22957e-158	1.13095	0.404	0.241	2.87534e-154	2	RTN3
1.68975e-158	1.16205	0.292	0.138	3.95148e-154	2	BACH1
6.00171e-157	1.12988	0.255	0.111	1.4035e-152	2	MOB3A
1.95462e-155	1.35231	0.324	0.171	4.57088e-151	2	GPCPD1
3.06294e-155	1.15888	0.577	0.51	7.16267e-151	2	GMFG
1.78649e-154	1.12494	0.585	0.522	4.1777e-150	2	ARPC5
1.91272e-153	1.33127	0.445	0.309	4.4729e-149	2	ANP32A
5.84425e-152	1.08237	0.271	0.122	1.36668e-147	2	HIST1H2AC
6.66314e-152	1.19339	0.266	0.121	1.55818e-147	2	NBPF10
3.00087e-150	1.10166	0.549	0.455	7.01754e-146	2	CAP1
1.18575e-149	1.13679	0.255	0.113	2.77288e-145	2	IQSEC1
1.50904e-148	0.918602	0.735	0.759	3.5289e-144	2	S100A11
3.87462e-147	1.18592	0.517	0.417	9.0608e-143	2	UBE2B
8.71796e-147	1.0971	0.285	0.14	2.03869e-142	2	NRBF2
1.37782e-146	1.09103	0.252	0.111	3.22203e-142	2	MAPK14
5.16455e-146	1.27637	0.318	0.171	1.20773e-141	2	SELPLG
1.05049e-144	1.39102	0.351	0.207	2.45657e-140	2	RICTOR
3.12714e-144	1.17575	0.406	0.259	7.31281e-140	2	PTPN6
2.53851e-143	1.26387	0.421	0.285	5.9363e-139	2	DOCK8
7.57747e-142	1.1664	0.502	0.394	1.77199e-137	2	CDC42SE1
7.70685e-141	1.57067	0.341	0.195	1.80225e-136	2	IFRD1
1.07078e-140	1.28025	0.408	0.273	2.50401e-136	2	JMJD1C
3.79968e-139	0.925622	0.56	0.399	8.88555e-135	2	KLF2
1.47793e-138	1.34061	0.495	0.385	3.45615e-134	2	CELF2
2.05383e-138	1.22988	0.262	0.125	4.80288e-134	2	CCDC88B
1.94902e-137	1.29863	0.283	0.145	4.55778e-133	2	FGD3
3.32152e-137	1.06909	0.25	0.116	7.76736e-133	2	CYB5R4
4.1186e-135	1.25229	0.352	0.213	9.63134e-131	2	MKNK2
5.8792e-132	1.1902	0.28	0.144	1.37485e-127	2	CTBS
1.76155e-130	1.32405	0.499	0.412	4.11937e-126	2	CCNL1
9.0684e-128	1.14607	0.285	0.149	2.12065e-123	2	MAP2K3
2.3976e-127	1.65535	0.285	0.154	5.60678e-123	2	KATNBL1
1.32565e-126	1.00162	0.32	0.174	3.10003e-122	2	IFNGR2
1.60268e-124	1.36834	0.324	0.193	3.74786e-120	2	LCP2
3.51837e-124	1.25027	0.466	0.366	8.2277e-120	2	DDX3X
9.35736e-123	1.21227	0.341	0.208	2.18822e-118	2	GBP2
1.40575e-122	1.36077	0.311	0.18	3.28734e-118	2	PHF20L1
2.81046e-122	1.15638	0.296	0.165	6.57226e-118	2	UBR2
8.11036e-121	1.19081	0.302	0.17	1.89661e-116	2	MYO9B
2.89423e-120	1.14522	0.282	0.155	6.76816e-116	2	ARHGAP25
5.51096e-119	1.07842	0.381	0.25	1.28874e-114	2	IFNGR1
9.18751e-119	1.15699	0.273	0.144	2.1485e-114	2	IL4R
2.31048e-118	0.710931	0.83	0.914	5.40305e-114	2	ACTB
4.16938e-118	0.994486	0.576	0.548	9.7501e-114	2	GNAI2
2.57869e-117	1.20788	0.481	0.391	6.03027e-113	2	RNASET2
3.26583e-117	1.23184	0.313	0.183	7.63713e-113	2	ATP2B1
2.83969e-115	1.2657	0.364	0.237	6.64062e-111	2	HIF1A
3.55195e-115	1.40501	0.487	0.401	8.30624e-111	2	WSB1
1.58622e-114	0.941991	0.325	0.184	3.70937e-110	2	RNF130
1.25784e-112	1.13867	0.47	0.365	2.94146e-108	2	PPP1R15A
2.47946e-112	1.04977	0.432	0.321	5.79821e-108	2	GRB2
3.41041e-110	0.700012	0.457	0.275	7.97525e-106	2	FCER1G
1.14481e-109	1.1094	0.333	0.207	2.67714e-105	2	LBR
1.60588e-109	0.951282	0.31	0.176	3.75534e-105	2	ABHD2
9.15465e-107	1.04705	0.361	0.242	2.14081e-102	2	WAS
1.29848e-103	1.01112	0.333	0.208	3.03649e-99	2	LAMP2
3.05169e-103	1.06981	0.296	0.172	7.13637e-99	2	NCOA4
7.12429e-102	1.11804	0.316	0.198	1.66602e-97	2	STK10
3.36845e-100	1.04113	0.316	0.192	7.87713e-96	2	STXBP2
1.1206e-99	1.08096	0.253	0.136	2.62052e-95	2	FNDC3B
1.39777e-98	1.17467	0.356	0.246	3.26869e-94	2	BAZ1A
1.99101e-97	1.15895	0.423	0.334	4.65597e-93	2	IDS
7.76333e-95	1.06638	0.356	0.248	1.81545e-90	2	PPP1R18
4.74435e-93	1.0132	0.368	0.261	1.10947e-88	2	PRKAR1A
7.00678e-88	1.07773	0.252	0.145	1.63854e-83	2	NIN
1.03782e-87	0.993629	0.328	0.213	2.42695e-83	2	TNFSF10
2.07777e-86	0.694456	0.256	0.135	4.85886e-82	2	FGL2
2.1916e-85	1.02533	0.331	0.225	5.12506e-81	2	MAPK1
2.30447e-85	1.09877	0.286	0.182	5.38899e-81	2	KAT6A
2.31105e-85	1.06792	0.56	0.561	5.40439e-81	2	PNRC1
8.34757e-85	1.17284	0.301	0.196	1.95208e-80	2	PKN2
6.03469e-84	0.978136	0.456	0.388	1.41121e-79	2	GPSM3
4.16778e-81	1.09321	0.304	0.199	9.74635e-77	2	PRKCB
1.59795e-79	0.931838	0.485	0.434	3.73681e-75	2	ACTR2
8.77452e-77	1.05197	0.394	0.294	2.05192e-72	2	ASAH1
9.63858e-77	1.2207	0.366	0.282	2.25398e-72	2	C6orf62
1.34461e-76	1.18807	0.376	0.288	3.14437e-72	2	TUBA1A
2.236e-76	1.19944	0.33	0.231	5.22888e-72	2	NFKBIZ
1.25458e-73	0.981095	0.281	0.184	2.93384e-69	2	IFNAR1
1.73896e-73	1.01137	0.32	0.226	4.06655e-69	2	ARHGAP30
4.97642e-73	0.98863	0.323	0.225	1.16374e-68	2	MYADM
6.44387e-72	0.982887	0.368	0.286	1.5069e-67	2	APBB1IP
3.41393e-71	0.599943	0.65	0.692	7.98348e-67	2	ARPC2
7.87741e-71	1.00314	0.349	0.262	1.84213e-66	2	KPNB1
2.1836e-70	1.25629	0.261	0.169	5.10634e-66	2	PAG1
3.20848e-69	1.06062	0.363	0.286	7.50304e-65	2	CASP4
4.59913e-69	0.926356	0.299	0.202	1.07551e-64	2	ATP6V0D1
5.11933e-69	1.01825	0.298	0.209	1.19716e-64	2	SEMA4D
6.68382e-69	1.07904	0.254	0.159	1.56301e-64	2	STX7
1.12355e-68	0.914912	0.268	0.173	2.62741e-64	2	CDKN2D
1.62055e-68	1.01618	0.364	0.287	3.78964e-64	2	ADRBK1
3.73585e-68	1.0179	0.466	0.43	8.73629e-64	2	CD53
7.05302e-68	1.06866	0.357	0.273	1.64935e-63	2	RBPJ
3.28241e-66	0.974725	0.412	0.351	7.67592e-62	2	CD46
2.07109e-65	0.700345	0.532	0.496	4.84324e-61	2	RAC1
2.53862e-63	0.860518	0.271	0.18	5.93657e-59	2	GLIPR2
6.96487e-62	0.821533	0.422	0.347	1.62874e-57	2	TKT
3.1162e-61	1.07478	0.271	0.184	7.28725e-57	2	QKI
6.79988e-61	0.93049	0.294	0.211	1.59015e-56	2	TAP1
7.23038e-58	1.0107	0.361	0.298	1.69082e-53	2	SH3GLB1
2.84587e-56	0.939272	0.265	0.185	6.65507e-52	2	CSNK1D
2.5976e-51	0.836192	0.479	0.475	6.07448e-47	2	UBE2D3
2.82734e-50	0.879769	0.479	0.466	6.61173e-46	2	STK4
5.90003e-50	0.969968	0.335	0.272	1.37972e-45	2	NFE2L2
9.12777e-50	1.44509	0.418	0.366	2.13453e-45	2	ALOX5AP
1.22712e-49	1.09603	0.344	0.289	2.86962e-45	2	PPP1R10
1.23565e-47	1.53766	0.3	0.24	2.88957e-43	2	PRKDC
9.50689e-47	0.984654	0.25	0.179	2.22319e-42	2	ANKRD13D
2.08409e-46	0.952605	0.307	0.24	4.87364e-42	2	PTBP3
5.91808e-46	0.842742	0.294	0.222	1.38394e-41	2	CCPG1
1.07285e-45	0.562126	0.331	0.244	2.50887e-41	2	FCGRT
3.44912e-45	0.886522	0.524	0.555	8.06576e-41	2	DDX17
7.43262e-45	1.0203	0.283	0.217	1.73812e-40	2	KMT2C
9.39427e-45	0.90429	0.383	0.347	2.19685e-40	2	PAK2
5.38986e-43	0.908929	0.268	0.203	1.26042e-38	2	NRD1
1.63699e-42	0.971166	0.302	0.245	3.8281e-38	2	AKNA
2.49413e-41	0.883047	0.277	0.215	5.83253e-37	2	HMHA1
3.565e-41	0.773093	0.271	0.202	8.33675e-37	2	LASP1
2.10115e-40	0.919864	0.307	0.253	4.91354e-36	2	CIR1
2.34463e-40	1.02574	0.256	0.191	5.48291e-36	2	FOSL2
3.67108e-40	0.523224	0.274	0.189	8.58483e-36	2	TIMP2
9.77445e-40	0.854006	0.26	0.199	2.28576e-35	2	IRF2
1.35277e-38	0.62131	0.422	0.371	3.16345e-34	2	ITGB2
2.73732e-38	0.740149	0.517	0.536	6.40121e-34	2	C1orf63
5.80219e-38	0.791314	0.262	0.201	1.35684e-33	2	S1PR4
1.33358e-37	1.04823	0.291	0.235	3.11857e-33	2	ARRDC3
2.90839e-34	0.890333	0.26	0.206	6.80127e-30	2	C17orf62
4.71312e-34	0.906149	0.261	0.209	1.10216e-29	2	RASSF5
4.71974e-34	0.812522	0.261	0.206	1.10371e-29	2	WBP2
5.6981e-33	0.788129	0.341	0.304	1.3325e-28	2	TLN1
1.55399e-32	0.836707	0.327	0.287	3.634e-28	2	OSBPL8
5.30707e-32	0.822756	0.342	0.31	1.24106e-27	2	PRR13
1.63375e-31	0.828416	0.311	0.271	3.82052e-27	2	PJA2
2.28655e-31	0.79402	0.344	0.311	5.34709e-27	2	ROCK1
3.04644e-31	0.938149	0.258	0.209	7.12411e-27	2	RBM5
5.7127e-30	0.8862	0.287	0.244	1.33591e-25	2	NIPBL
6.9253e-30	0.848096	0.387	0.378	1.61948e-25	2	TAPBP
2.53123e-29	1.32123	0.306	0.263	5.91929e-25	2	TNFAIP3
7.39803e-29	0.704617	0.515	0.563	1.73003e-24	2	RHOA
2.21367e-28	0.904045	0.253	0.207	5.17666e-24	2	SETX
2.85612e-28	0.704314	0.407	0.4	6.67903e-24	2	MSN
6.82028e-28	0.93157	0.263	0.22	1.59492e-23	2	TANK
2.56863e-27	0.685011	0.297	0.254	6.00674e-23	2	CAPZA2
1.5477e-25	0.801769	0.469	0.456	3.6193e-21	2	BRI3
5.87765e-25	0.748119	0.439	0.468	1.37449e-20	2	PCBP1
7.36859e-24	0.975103	0.262	0.227	1.72314e-19	2	YIPF4
1.16698e-22	0.554769	0.291	0.466	2.72898e-18	2	TPI1
2.64743e-22	0.729965	0.258	0.221	6.19102e-18	2	TGFBR2
2.82157e-22	1.12267	0.269	0.234	6.59824e-18	2	BNIP3L
3.0901e-22	0.757198	0.353	0.344	7.22621e-18	2	ARPC4
3.42976e-20	0.998768	0.317	0.294	8.02049e-16	2	SAMSN1
6.38361e-20	0.812497	0.368	0.372	1.49281e-15	2	IFI16
4.77973e-19	0.855916	0.359	0.368	1.11774e-14	2	SCAF11
1.24969e-18	0.734886	0.356	0.353	2.92241e-14	2	SERPINB1
2.52897e-18	0.803055	0.48	0.464	5.91399e-14	2	CXCR4
6.71571e-18	0.955655	0.429	0.483	1.57047e-13	2	FUS
2.3388e-17	0.634978	0.425	0.46	5.46928e-13	2	ACTR3
3.1989e-17	0.661939	0.359	0.366	7.48063e-13	2	CAPZA1
8.95445e-16	0.69819	0.255	0.23	2.094e-11	2	CNPY3
2.7765e-15	0.952716	0.258	0.236	6.49285e-11	2	MGAT1
6.2499e-15	0.792994	0.4	0.421	1.46154e-10	2	RNF213
6.64708e-15	0.786257	0.26	0.243	1.55442e-10	2	RNF145
2.43372e-14	0.579292	0.16	0.252	5.69124e-10	2	EML4
1.92561e-13	0.680325	0.384	0.413	4.50304e-09	2	JAK1
6.533e-13	0.666659	0.357	0.375	1.52774e-08	2	ANXA11
2.00652e-12	0.766232	0.307	0.311	4.69224e-08	2	PPP1R12A
4.71119e-12	0.582712	0.375	0.397	1.10171e-07	2	MYH9
8.5869e-12	0.570783	0.364	0.382	2.00805e-07	2	PSMB9
5.65077e-10	0.769292	0.277	0.284	1.32143e-05	2	RSBN1L
6.77977e-10	0.672932	0.271	0.268	1.58545e-05	2	RAB7A
8.34646e-10	0.677421	0.258	0.252	1.95182e-05	2	WAC
3.40209e-07	0.665891	0.384	0.444	0.0079558	2	SF3B1
1.35433e-06	0.579403	0.271	0.279	0.0316711	2	GNB1
1.42111e-06	0.647926	0.408	0.468	0.0332326	2	PGK1
4.96147e-06	0.846856	0.298	0.331	0.116024	2	CHD2
1.13357e-05	0.567993	0.295	0.308	0.265086	2	CLEC2B
2.07996e-05	0.736565	0.241	0.25	0.486398	2	YPEL5
9.72117e-05	0.553424	0.277	0.3	1	2	RAP1A
0.000319219	0.521365	0.199	0.264	1	2	LENG8
0.00074087	0.94164	0.24	0.261	1	2	ZNF292
0.000809635	0.735029	0.248	0.261	1	2	ZFAND5
0.000937765	0.825658	0.313	0.359	1	2	TNRC6B
0.0010075	0.647772	0.302	0.337	1	2	IL2RG
0.00115842	0.529685	0.33	0.37	1	2	RTN4
0.00215624	0.909098	0.364	0.425	1	2	SQSTM1
0.00564292	0.596046	0.253	0.272	1	2	GTF2I
0.0059781	0.613197	0.238	0.314	1	2	ZNF207
0.00777647	0.577399	0.341	0.408	1	2	KMT2E
0.0089579	0.824847	0.323	0.379	1	2	MAP1LC3B
0	2.80336	0.992	0.153	0	3	CCL5
0	2.4974	0.839	0.062	0	3	CD8A
0	2.32906	0.901	0.175	0	3	CCL4
0	2.23505	0.442	0.025	0	3	KLRC1
0	2.13139	0.958	0.228	0	3	CD2
0	2.12309	0.757	0.075	0	3	AC092580.4
0	2.05628	0.741	0.048	0	3	CD8B
0	2.02192	0.814	0.22	0	3	IL7R
0	1.96358	0.945	0.224	0	3	CD3D
0	1.86138	0.89	0.256	0	3	CD69
0	1.85219	0.841	0.185	0	3	CD7
0	1.81736	0.903	0.203	0	3	CD3G
0	1.75801	0.981	0.57	0	3	ZFP36L2
0	1.73507	0.557	0.116	0	3	KLRB1
0	1.7222	0.631	0.062	0	3	GZMH
0	1.71402	0.934	0.22	0	3	CD3E
0	1.69916	0.956	0.422	0	3	CXCR4
0	1.58676	0.706	0.128	0	3	GZMA
0	1.58245	0.991	0.671	0	3	BTG1
0	1.50282	0.748	0.164	0	3	RUNX3
0	1.49845	0.531	0.065	0	3	GZMB
0	1.49447	0.518	0.04	0	3	ITGA1
0	1.47705	0.666	0.146	0	3	SYTL3
0	1.47006	0.583	0.057	0	3	KLRD1
0	1.46992	0.695	0.089	0	3	HOPX
0	1.42619	0.946	0.346	0	3	HCST
0	1.41022	0.683	0.185	0	3	PRDM1
0	1.39617	0.678	0.124	0	3	CD96
0	1.38578	0.357	0.074	0	3	GNLY
0	1.37916	0.672	0.186	0	3	DUSP2
0	1.37466	0.946	0.332	0	3	IL32
0	1.36982	0.914	0.301	0	3	PTPRCAP
0	1.36743	0.876	0.333	0	3	CYTIP
0	1.36035	0.359	0.022	0	3	XCL1
0	1.33997	0.558	0.082	0	3	GPR171
0	1.3389	0.71	0.132	0	3	CTSW
0	1.32519	0.47	0.038	0	3	CXCR6
0	1.30583	0.948	0.378	0	3	CD52
0	1.29176	0.316	0.014	0	3	KLRC2
0	1.29073	0.782	0.27	0	3	ID2
0	1.27526	0.835	0.307	0	3	PDCD4
0	1.22263	0.689	0.166	0	3	PARP8
0	1.20954	0.353	0.008	0	3	ZNF683
0	1.20312	0.59	0.128	0	3	OXNAD1
0	1.20219	0.461	0.073	0	3	MYBL1
0	1.19425	0.819	0.27	0	3	ETS1
0	1.19145	0.8	0.257	0	3	EVL
0	1.15624	0.702	0.2	0	3	EMB
0	1.15487	0.578	0.123	0	3	PTPN22
0	1.13359	0.364	0.035	0	3	XCL2
0	1.12971	0.666	0.089	0	3	PRF1
0	1.10692	0.415	0.079	0	3	PDE4D
0	1.09485	0.789	0.274	0	3	STK17A
0	1.09369	0.675	0.181	0	3	LCK
0	1.09231	0.55	0.142	0	3	AIM1
0	1.09134	0.587	0.139	0	3	APOBEC3G
0	1.06832	0.668	0.229	0	3	PIK3IP1
0	1.06803	0.706	0.229	0	3	C9orf142
0	1.06465	0.783	0.308	0	3	CRIP1
0	1.04412	0.78	0.265	0	3	CLEC2B
0	1.03529	0.663	0.205	0	3	RGS1
0	1.02741	0.745	0.274	0	3	LEPROTL1
0	1.02417	0.825	0.123	0	3	NKG7
0	1.02363	0.633	0.141	0	3	GZMM
0	0.99789	0.459	0.09	0	3	PTGER2
0	0.990073	0.581	0.174	0	3	SOCS1
0	0.971904	0.504	0.125	0	3	PTGER4
0	0.965159	0.65	0.208	0	3	FYN
0	0.961561	0.606	0.23	0	3	PIK3R1
0	0.953322	0.859	0.43	0	3	SRSF7
0	0.952325	0.998	0.846	0	3	RPS27
0	0.944131	0.825	0.358	0	3	CD99
0	0.941526	0.591	0.208	0	3	CNOT6L
0	0.929276	0.69	0.262	0	3	FKBP5
0	0.929264	0.383	0.052	0	3	THEMIS
0	0.925067	0.996	0.771	0	3	RPS29
0	0.912726	0.763	0.322	0	3	PPP2R5C
0	0.908773	0.441	0.098	0	3	CBLB
0	0.904825	0.742	0.253	0	3	ARL4C
0	0.898993	0.985	0.651	0	3	RPS10
0	0.896303	0.742	0.326	0	3	HIST1H4C
0	0.877944	0.858	0.401	0	3	STK17B
0	0.873802	1	0.943	0	3	TMSB4X
0	0.867046	0.456	0.115	0	3	LYAR
0	0.860657	0.505	0.152	0	3	RORA
0	0.859098	0.996	0.797	0	3	RPS19
0	0.85146	0.94	0.559	0	3	TMEM66
0	0.847124	0.708	0.262	0	3	AAK1
0	0.843254	0.76	0.345	0	3	DDX24
0	0.842556	0.715	0.28	0	3	RARRES3
0	0.841307	0.584	0.18	0	3	SPOCK2
0	0.840819	0.599	0.199	0	3	PIP4K2A
0	0.828406	0.581	0.243	0	3	TOB1
0	0.815203	0.902	0.559	0	3	TSC22D3
0	0.80871	0.299	0.027	0	3	LAG3
0	0.806409	0.539	0.175	0	3	SKAP1
0	0.804277	0.357	0.064	0	3	SCML4
0	0.779911	0.992	0.8	0	3	RPS3
0	0.779907	0.358	0.072	0	3	STAT4
0	0.77069	0.383	0.081	0	3	SNTB2
0	0.765307	0.334	0.087	0	3	PRMT10
0	0.764298	0.482	0.145	0	3	ODF2L
0	0.759164	0.327	0.053	0	3	SPRY1
0	0.755559	0.472	0.139	0	3	TC2N
0	0.752846	0.991	0.738	0	3	RPL23A
0	0.741836	0.726	0.3	0	3	ACAP1
0	0.740242	0.419	0.127	0	3	RP11-94L15.2
0	0.739188	0.482	0.166	0	3	2024-09-01
0	0.737622	0.397	0.102	0	3	CHST12
0	0.732766	0.394	0.109	0	3	ITGAE
0	0.728383	0.803	0.334	0	3	CD48
0	0.725787	0.428	0.119	0	3	PTPN4
0	0.725607	0.57	0.242	0	3	NAP1L4
0	0.725431	0.771	0.368	0	3	CKLF
0	0.717247	0.354	0.083	0	3	CAMK4
0	0.717203	0.406	0.117	0	3	ITK
0	0.714445	0.294	0.041	0	3	CXCR3
0	0.713223	0.418	0.121	0	3	CLEC2D
0	0.706513	0.501	0.186	0	3	SLC38A1
0	0.700194	0.998	0.909	0	3	RPL41
0	0.6959	0.463	0.137	0	3	GABARAPL1
0	0.69141	0.266	0.035	0	3	AUTS2
0	0.690736	0.99	0.713	0	3	RPS21
0	0.687518	0.592	0.156	0	3	FKBP11
0	0.682678	0.972	0.655	0	3	TMA7
0	0.682459	0.525	0.2	0	3	SLFN5
0	0.681777	0.42	0.138	0	3	RCAN3
0	0.681475	0.994	0.821	0	3	RPS27A
0	0.679502	0.537	0.196	0	3	BUB3
0	0.677846	0.393	0.091	0	3	MATK
0	0.675903	0.585	0.239	0	3	ABRACL
0	0.675153	0.641	0.295	0	3	TERF2IP
0	0.674115	0.968	0.639	0	3	CALM1
0	0.670188	0.4	0.121	0	3	TTC39C
0	0.666703	0.346	0.094	0	3	SIT1
0	0.663243	0.285	0.069	0	3	LDLRAD4
0	0.661375	0.337	0.077	0	3	SH2D2A
0	0.661134	0.378	0.111	0	3	SLC4A7
0	0.656797	0.41	0.127	0	3	MDFIC
0	0.655195	0.397	0.12	0	3	BCL11B
0	0.654677	0.609	0.254	0	3	IKZF1
0	0.654271	0.487	0.171	0	3	LINC00152
0	0.646482	0.265	0.04	0	3	SLA2
0	0.64387	0.392	0.123	0	3	DOCK10
0	0.638509	0.992	0.801	0	3	RPS12
0	0.628675	0.701	0.322	0	3	HMGB2
0	0.621884	0.361	0.1	0	3	PITPNC1
0	0.620376	0.584	0.182	0	3	CD247
0	0.619609	0.291	0.066	0	3	SLFN12L
0	0.612358	0.605	0.237	0	3	TNFAIP3
0	0.611592	0.315	0.08	0	3	SYTL2
0	0.593656	0.34	0.092	0	3	SAMD3
0	0.587917	0.329	0.066	0	3	ABI3
0	0.571187	0.635	0.23	0	3	GIMAP7
0	0.559489	0.315	0.085	0	3	MNAT1
0	0.556352	1	0.964	0	3	B2M
0	0.518028	0.394	0.12	0	3	STOM
8.60677e-304	0.76166	0.451	0.161	2.01269e-299	3	RP11-138A9.2
5.32337e-302	0.69257	0.365	0.112	1.24487e-297	3	ANKRD28
4.65946e-301	0.655953	0.981	0.694	1.08962e-296	3	DDX5
5.68684e-301	0.55358	0.383	0.118	1.32987e-296	3	ARAP2
1.29053e-300	0.734341	0.753	0.372	3.01792e-296	3	DDIT4
1.29309e-300	0.505223	0.68	0.282	3.02389e-296	3	IFITM1
4.09692e-300	0.665281	0.366	0.114	9.58066e-296	3	BCL2
2.25956e-299	0.640478	0.721	0.343	5.28398e-295	3	HLA-F
2.96982e-299	0.59414	0.306	0.082	6.94494e-295	3	SAP30
6.14399e-299	0.670632	0.522	0.207	1.43677e-294	3	RHOH
8.45072e-295	0.589827	0.363	0.111	1.9762e-290	3	PRKCH
4.45002e-293	0.598922	0.683	0.316	1.04064e-288	3	CDC42SE2
4.7151e-293	0.607656	0.992	0.794	1.10263e-288	3	RPS15A
1.7314e-284	0.648775	0.877	0.468	4.04888e-280	3	RPL17
2.16007e-283	0.721838	0.616	0.282	5.05133e-279	3	H1FX
1.25992e-281	0.623299	0.959	0.635	2.94632e-277	3	HMGB1
5.13697e-279	0.58502	0.574	0.241	1.20128e-274	3	TBC1D10C
2.55708e-277	0.539301	0.378	0.124	5.97972e-273	3	RASAL3
1.4854e-275	0.582271	0.581	0.251	3.47361e-271	3	CCND3
1.61126e-275	0.527828	0.417	0.144	3.76794e-271	3	GPR65
1.83165e-274	0.577869	0.964	0.672	4.28332e-270	3	MYL12A
2.37975e-274	0.632289	0.478	0.185	5.56506e-270	3	ITM2A
2.71324e-273	0.534799	0.366	0.115	6.34492e-269	3	PRKCQ-AS1
2.34522e-271	0.565765	0.995	0.845	5.4843e-267	3	RPL30
3.33606e-271	0.592606	0.389	0.133	7.80138e-267	3	CCSER2
1.32211e-270	0.53658	0.282	0.078	3.09176e-266	3	SUSD3
1.89998e-270	0.663867	0.965	0.703	4.44311e-266	3	TXNIP
3.45131e-270	0.549909	0.804	0.431	8.07089e-266	3	2024-09-07
1.35371e-267	0.559376	0.348	0.108	3.16564e-263	3	IPCEF1
2.4295e-266	0.57498	0.998	0.866	5.68138e-262	3	RPLP1
8.56992e-265	0.636653	0.431	0.163	2.00408e-260	3	CCNH
1.9579e-264	0.610229	0.393	0.138	4.57855e-260	3	PTPN7
2.8851e-263	0.624301	0.367	0.127	6.7468e-259	3	NDNL2
1.8295e-262	0.546098	0.994	0.795	4.27829e-258	3	RPS18
2.03855e-260	0.571054	0.466	0.187	4.76714e-256	3	CCDC107
7.4748e-260	0.547436	0.416	0.151	1.74798e-255	3	MGAT4A
1.00162e-258	0.577531	0.571	0.254	2.3423e-254	3	PRMT2
4.52667e-257	0.58595	0.454	0.175	1.05856e-252	3	LBH
1.60266e-254	0.51653	0.282	0.079	3.74782e-250	3	RP11-51J9.5
1.26153e-249	0.62745	0.369	0.129	2.95009e-245	3	APOBEC3C
1.5622e-249	0.584422	0.946	0.559	3.65319e-245	3	RPL36A
8.41468e-249	0.513608	0.291	0.085	1.96777e-244	3	RNF125
2.48783e-247	0.557268	0.485	0.203	5.81779e-243	3	SYNRG
6.7052e-243	0.554187	0.998	0.925	1.56801e-238	3	MT-CYB
7.77171e-243	0.528421	0.539	0.239	1.81741e-238	3	ARF6
6.04271e-242	0.51056	0.334	0.108	1.41309e-237	3	GPRIN3
6.34314e-242	0.561061	0.991	0.725	1.48334e-237	3	RPL35
1.37608e-241	0.534868	0.989	0.755	3.21797e-237	3	RPLP2
4.62361e-241	0.593367	0.953	0.596	1.08123e-236	3	TOMM7
5.30601e-239	0.526104	0.561	0.262	1.24081e-234	3	YWHAQ
3.75937e-238	0.554273	0.992	0.746	8.79129e-234	3	RPS25
1.83709e-236	0.55596	0.598	0.286	4.29604e-232	3	PPP1R2
7.10384e-236	0.561364	0.359	0.129	1.66123e-231	3	PPM1K
3.10595e-235	0.502733	0.923	0.518	7.26326e-231	3	ARHGDIB
4.22721e-234	0.512102	0.999	0.944	9.88533e-230	3	MT-ATP6
5.95501e-234	0.580247	0.559	0.257	1.39258e-229	3	UGP2
1.34706e-232	0.519627	0.555	0.252	3.1501e-228	3	FNBP1
1.86399e-231	0.641711	0.751	0.401	4.35894e-227	3	JUN
1.49779e-229	0.56224	0.52	0.236	3.50258e-225	3	G3BP2
7.54429e-229	0.541914	0.984	0.677	1.76423e-224	3	RPL10A
1.03599e-228	0.537634	0.696	0.369	2.42266e-224	3	SRSF2
3.02368e-226	0.540743	0.991	0.752	7.07087e-222	3	RPS7
4.99933e-223	0.511065	0.327	0.113	1.16909e-218	3	LPIN1
4.56803e-222	0.5386	0.302	0.097	1.06823e-217	3	RASGRP1
3.28529e-221	0.502409	0.288	0.091	7.68265e-217	3	GRAP2
2.29434e-219	0.559817	0.328	0.113	5.36531e-215	3	PDE3B
6.79854e-219	0.531749	0.502	0.227	1.58984e-214	3	KMT2A
6.02728e-218	0.604319	0.956	0.686	1.40948e-213	3	SH3BGRL3
1.24017e-217	0.593765	0.491	0.22	2.90013e-213	3	CDKN1B
1.59256e-210	0.519419	0.982	0.701	3.7242e-206	3	RPL38
8.67205e-210	0.527302	0.381	0.146	2.02796e-205	3	ITGA4
2.10092e-208	0.510096	0.89	0.537	4.913e-204	3	HSPA8
1.60543e-202	0.530863	0.993	0.763	3.7543e-198	3	RPL26
1.95568e-193	0.557781	0.452	0.203	4.57336e-189	3	CITED2
6.16118e-189	0.601134	0.321	0.12	1.44079e-184	3	HIST1H1D
3.70791e-180	0.649026	0.321	0.124	8.67094e-176	3	TSPYL2
1.0024e-169	0.787932	0.61	0.33	2.34412e-165	3	DNAJB1
1.33433e-148	0.766178	0.517	0.27	3.12034e-144	3	HSPA1B
3.41074e-140	0.546151	0.957	0.713	7.97602e-136	3	HSP90AA1
0	5.58119	0.717	0.088	0	4	SPP1
0	5.11239	0.698	0.07	0	4	APOE
0	4.72776	0.697	0.044	0	4	APOC1
0	3.9097	0.757	0.026	0	4	GPNMB
0	3.73624	0.507	0.028	0	4	C1QA
0	3.6993	0.883	0.257	0	4	CTSB
0	3.66527	0.401	0.024	0	4	C1QB
0	3.58766	0.857	0.47	0	4	CSTB
0	3.57489	0.936	0.477	0	4	CTSD
0	3.5622	0.998	0.948	0	4	FTL
0	3.55052	0.655	0.07	0	4	CTSL
0	3.41018	0.43	0.081	0	4	RNASE1
0	3.34595	0.631	0.157	0	4	PLIN2
0	3.24949	0.539	0.081	0	4	NUPR1
0	3.14963	0.799	0.105	0	4	CD68
0	3.1072	0.411	0.014	0	4	C1QC
0	2.89646	0.885	0.272	0	4	HLA-DRA
0	2.81533	0.531	0.102	0	4	FABP5
0	2.70393	0.807	0.259	0	4	HLA-DRB1
0	2.48499	0.742	0.262	0	4	HLA-DPA1
0	2.42867	0.845	0.432	0	4	CD74
0	2.41883	0.42	0.063	0	4	FBP1
0	2.39241	0.563	0.096	0	4	HLA-DQA1
0	2.38869	0.683	0.215	0	4	CTSZ
0	2.35885	0.453	0.075	0	4	ACP5
0	2.34253	0.687	0.151	0	4	HLA-DQB1
0	2.29157	0.788	0.267	0	4	NPC2
0	2.28577	0.714	0.259	0	4	HLA-DPB1
0	2.2843	0.529	0.087	0	4	CD14
0	2.27982	0.857	0.39	0	4	GPX1
0	2.27347	0.29	0.006	0	4	MARCO
0	2.2646	0.789	0.332	0	4	LGALS1
0	2.23739	0.381	0.088	0	4	HLA-DRB5
0	2.17994	0.397	0.066	0	4	CCL3
0	2.17702	0.836	0.397	0	4	PSAP
0	2.14744	0.458	0.032	0	4	MS4A7
0	2.13329	0.424	0.066	0	4	LIPA
0	2.12127	0.997	0.963	0	4	FTH1
0	2.11608	0.719	0.233	0	4	GRN
0	2.11261	0.309	0.036	0	4	CXCL3
0	2.05624	0.4	0.046	0	4	FCGR2B
0	2.02178	0.334	0.007	0	4	MSR1
0	2.00333	0.902	0.318	0	4	TYROBP
0	1.99943	0.429	0.076	0	4	VCAN
0	1.95521	0.819	0.249	0	4	FCER1G
0	1.92481	0.358	0.018	0	4	CYP27A1
0	1.87846	0.641	0.243	0	4	CAPG
0	1.87841	0.423	0.032	0	4	DAB2
0	1.86968	0.313	0.017	0	4	CD163
0	1.8571	0.305	0.003	0	4	TREM2
0	1.80344	0.356	0.038	0	4	TGFBI
0	1.80284	0.255	0.006	0	4	VSIG4
0	1.78814	0.283	0.015	0	4	IL4I1
0	1.73756	0.654	0.325	0	4	ATP6V1F
0	1.73449	0.59	0.259	0	4	GSTO1
0	1.72897	0.3	0.009	0	4	MS4A4A
0	1.72177	0.282	0.033	0	4	HMOX1
0	1.71688	0.267	0.037	0	4	CXCL2
0	1.70349	0.307	0.007	0	4	PLA2G7
0	1.69179	0.26	0.04	0	4	LGMN
0	1.68132	0.473	0.094	0	4	C15orf48
0	1.67876	0.72	0.352	0	4	LGALS3
0	1.67007	0.781	0.43	0	4	BRI3
0	1.66122	0.367	0.114	0	4	PLD3
0	1.63044	0.747	0.353	0	4	GLUL
0	1.62607	0.932	0.672	0	4	VIM
0	1.61848	0.871	0.569	0	4	CD63
0	1.61811	0.457	0.122	0	4	HLA-DMA
0	1.61377	0.57	0.184	0	4	PLAUR
0	1.60535	0.469	0.097	0	4	FCGR3A
0	1.60061	0.275	0.011	0	4	SLCO2B1
0	1.59739	0.606	0.223	0	4	FCGRT
0	1.5871	0.327	0.039	0	4	MAFB
0	1.56896	0.539	0.169	0	4	SLC11A1
0	1.56468	0.49	0.135	0	4	CTSH
0	1.56292	0.286	0.04	0	4	ATF5
0	1.5583	0.647	0.276	0	4	ASAH1
0	1.52868	0.277	0.015	0	4	SDC2
0	1.51355	0.546	0.195	0	4	CD9
0	1.50962	0.316	0.044	0	4	GM2A
0	1.48611	0.319	0.031	0	4	SCD
0	1.48301	0.818	0.306	0	4	LYZ
0	1.47981	0.318	0.02	0	4	OLR1
0	1.44751	0.363	0.041	0	4	LRP1
0	1.42833	0.88	0.773	0	4	GAPDH
0	1.41188	0.393	0.096	0	4	CREG1
0	1.40428	0.414	0.139	0	4	SGK1
0	1.38853	0.775	0.641	0	4	ALDOA
0	1.37364	0.291	0.034	0	4	A2M
0	1.36994	0.334	0.05	0	4	RNASE6
0	1.36976	0.436	0.156	0	4	BLVRB
0	1.3623	0.792	0.355	0	4	CST3
0	1.3556	0.626	0.336	0	4	ANXA5
0	1.33728	0.537	0.168	0	4	TIMP2
0	1.32654	0.287	0.009	0	4	LILRB4
0	1.31893	0.614	0.179	0	4	AIF1
0	1.29975	0.399	0.118	0	4	NINJ1
0	1.29025	0.399	0.124	0	4	HEXB
0	1.27068	0.392	0.126	0	4	HEXA
0	1.26969	0.35	0.075	0	4	ABCA1
0	1.26872	0.272	0.058	0	4	HK2
0	1.26212	0.3	0.06	0	4	HLA-DMB
0	1.23154	0.291	0.017	0	4	ZNF385A
0	1.23132	0.296	0.031	0	4	BCAT1
0	1.23063	0.269	0.047	0	4	PMP22
0	1.21164	0.39	0.107	0	4	CXCL16
0	1.21043	0.932	0.742	0	4	S100A11
0	1.19544	0.294	0.062	0	4	VAT1
0	1.19323	0.284	0.048	0	4	FNIP2
0	1.18892	0.324	0.077	0	4	CYBB
0	1.15416	0.33	0.064	0	4	PLXDC2
0	1.13328	0.304	0.055	0	4	KCTD12
0	1.12302	0.261	0.016	0	4	CD86
0	1.08978	0.397	0.126	0	4	GRINA
0	1.02668	0.271	0.049	0	4	NPL
0	1.02558	0.331	0.087	0	4	GNS
0	1.01514	0.369	0.095	0	4	RP11-290F20.3
0	0.929767	0.457	0.144	0	4	FCGR2A
0	0.894729	0.25	0.047	0	4	CYFIP1
0	0.854452	0.253	0.052	0	4	DMXL2
0	0.851834	0.25	0.052	0	4	HNMT
0	0.642838	0.453	0.134	0	4	IL8
1.63604e-301	1.12591	0.404	0.141	3.82587e-297	4	TPP1
1.66617e-300	1.31567	0.7	0.476	3.89634e-296	4	GPX4
9.36865e-300	1.12709	0.343	0.104	2.19086e-295	4	P4HA1
2.95846e-299	1.319	0.553	0.268	6.91836e-295	4	H2AFY
4.06742e-299	1.14545	0.612	0.291	9.51167e-295	4	APLP2
5.8912e-297	1.05973	0.268	0.066	1.37766e-292	4	SOAT1
4.59747e-293	1.39718	0.642	0.38	1.07512e-288	4	RNASET2
3.89602e-290	1.3356	0.487	0.217	9.11085e-286	4	MGAT1
1.52122e-283	1.38074	0.748	0.562	3.55738e-279	4	S100A10
2.64391e-280	1.08477	0.386	0.134	6.18279e-276	4	PDXK
5.63776e-279	1.22781	0.268	0.068	1.31839e-274	4	HLA-DQA2
2.93675e-277	0.844843	0.257	0.062	6.8676e-273	4	GAA
3.42408e-276	0.938488	0.852	0.777	8.0072e-272	4	SERF2
1.75262e-273	0.725331	0.282	0.07	4.09851e-269	4	PILRA
1.79706e-269	1.21702	0.616	0.348	4.20242e-265	4	PKM
8.31843e-269	1.12684	0.282	0.077	1.94526e-264	4	CD83
3.81842e-264	1.28617	0.494	0.238	8.92939e-260	4	AP2S1
2.62064e-259	0.828863	0.254	0.064	6.12836e-255	4	CORO1C
1.11379e-249	1.33902	0.531	0.285	2.6046e-245	4	LAMP1
1.09922e-248	1.29282	0.648	0.411	2.57053e-244	4	PRDX1
2.7256e-247	0.932759	0.447	0.177	6.37381e-243	4	RNF130
3.40407e-234	1.2387	0.429	0.19	7.96041e-230	4	UPP1
3.31984e-228	1.01842	0.759	0.595	7.76344e-224	4	YBX1
1.54103e-227	0.868504	0.654	0.374	3.60369e-223	4	ANXA2
1.22313e-225	1.0327	0.315	0.102	2.86028e-221	4	ADM
1.2236e-223	0.945663	0.734	0.534	2.8614e-219	4	LAPTM5
1.84135e-223	1.0677	0.293	0.097	4.306e-219	4	LAIR1
7.45092e-223	0.682142	0.269	0.077	1.7424e-218	4	ADAM9
2.56192e-218	0.98296	0.639	0.405	5.99106e-214	4	ATP6V0B
8.49658e-215	1.04631	0.376	0.154	1.98692e-210	4	ATP6AP1
3.26417e-213	0.934174	0.264	0.081	7.63327e-209	4	RAB13
1.48364e-212	0.861209	0.674	0.424	3.46949e-208	4	CEBPB
2.61903e-212	0.732	0.85	0.784	6.1246e-208	4	OAZ1
4.55524e-212	1.26129	0.642	0.469	1.06524e-207	4	ENO1
7.28416e-212	1.03015	0.402	0.166	1.7034e-207	4	ZEB2
1.48905e-211	1.19963	0.437	0.207	3.48214e-207	4	LIMS1
1.35858e-209	1.18809	0.417	0.188	3.17704e-205	4	CTSA
3.58838e-209	1.04349	0.697	0.534	8.39143e-205	4	EIF4A1
8.23397e-203	0.550335	0.833	0.662	1.92551e-198	4	SAT1
1.10088e-202	1.25615	0.618	0.417	2.5744e-198	4	CD81
6.37055e-197	0.640815	0.285	0.089	1.48975e-192	4	RAB31
3.77847e-195	1.13014	0.32	0.123	8.83595e-191	4	MAF
2.13967e-192	1.20011	0.282	0.099	5.00363e-188	4	TFRC
3.35467e-191	1.23781	0.543	0.314	7.8449e-187	4	TIMP1
4.01655e-188	0.631577	0.275	0.086	9.39269e-184	4	SIRPA
3.26024e-185	0.745748	0.311	0.111	7.62407e-181	4	LY96
9.12583e-185	0.638775	0.967	0.861	2.13407e-180	4	TMSB10
1.4381e-183	1.66383	0.326	0.138	3.363e-179	4	GCHFR
3.02237e-183	0.817417	0.331	0.121	7.06781e-179	4	CFD
1.71431e-182	0.975868	0.266	0.093	4.00892e-178	4	EIF4EBP1
2.42417e-181	1.08627	0.384	0.178	5.66891e-177	4	ATOX1
1.38123e-177	0.975083	0.594	0.358	3.23e-173	4	ITGB2
3.31405e-177	0.913181	0.584	0.339	7.74991e-173	4	TYMP
3.43521e-175	0.861286	0.278	0.101	8.03323e-171	4	IRAK1
4.82326e-175	1.2601	0.362	0.163	1.12792e-170	4	NDRG1
9.14336e-174	1.09272	0.601	0.435	2.13817e-169	4	TPI1
5.51188e-173	0.792063	0.327	0.128	1.28895e-168	4	VEGFA
4.04174e-164	0.625056	0.658	0.425	9.4516e-160	4	SDCBP
1.23509e-159	0.889742	0.572	0.355	2.88827e-155	4	ALOX5AP
2.90777e-156	1.04666	0.356	0.173	6.79983e-152	4	VEGFB
7.40692e-156	0.773211	0.298	0.116	1.73211e-151	4	ETS2
1.57719e-152	0.820093	0.489	0.258	3.68827e-148	4	IER3
9.6981e-152	0.701035	0.369	0.162	2.2679e-147	4	ATP6V1B2
3.38623e-151	1.00264	0.404	0.209	7.9187e-147	4	ERO1L
5.53191e-149	0.984381	0.353	0.165	1.29364e-144	4	METRNL
7.97687e-148	0.951226	0.257	0.1	1.86539e-143	4	TMEM70
8.14878e-147	0.514807	0.428	0.199	1.90559e-142	4	BCL2A1
2.04199e-146	0.958275	0.329	0.148	4.7752e-142	4	ARHGAP18
9.1855e-146	0.946891	0.296	0.128	2.14803e-141	4	RALA
8.16514e-145	1.05665	0.492	0.313	1.90942e-140	4	MGST3
3.36082e-144	0.722432	0.275	0.106	7.85928e-140	4	ZFYVE16
2.18347e-139	0.738947	0.307	0.127	5.10605e-135	4	SNX10
7.71372e-135	0.77438	0.335	0.156	1.80385e-130	4	PLEKHB2
2.10833e-134	0.865291	0.413	0.223	4.93033e-130	4	BNIP3L
4.98352e-134	0.93412	0.281	0.118	1.1654e-129	4	LTA4H
2.14713e-133	0.832987	0.286	0.123	5.02106e-129	4	TUBA1C
2.40064e-131	1.14529	0.436	0.267	5.61389e-127	4	LRPAP1
1.01e-124	0.986478	0.45	0.28	2.36189e-120	4	BCAP31
1.50559e-124	0.727513	0.361	0.174	3.52082e-120	4	IFNGR2
1.53655e-123	0.904538	0.319	0.152	3.59323e-119	4	PPT1
4.83213e-122	0.680757	0.26	0.106	1.12999e-117	4	CD300A
2.39506e-119	0.556897	0.264	0.106	5.60084e-115	4	ITGAM
5.11573e-113	1.03908	0.59	0.477	1.19631e-108	4	LDHA
6.36485e-109	0.790239	0.315	0.163	1.48842e-104	4	VKORC1
1.77317e-108	0.637566	0.284	0.128	4.14656e-104	4	PLSCR1
6.99509e-107	0.802866	0.273	0.128	1.6358e-102	4	CNDP2
7.99211e-107	0.787663	0.334	0.167	1.86896e-102	4	GSN
9.32193e-106	0.622662	0.362	0.191	2.17993e-101	4	RNF13
4.13364e-101	0.93309	0.413	0.264	9.66651e-97	4	ATP6AP2
1.05111e-99	0.797429	0.477	0.32	2.45803e-95	4	GRB2
3.97086e-98	1.09063	0.305	0.166	9.28585e-94	4	FDX1
4.04333e-98	0.621957	0.376	0.208	9.45533e-94	4	LAMP2
1.1134e-97	0.541311	0.399	0.218	2.6037e-93	4	SLC16A3
6.24052e-96	0.804765	0.386	0.236	1.45935e-91	4	M6PR
1.84265e-95	1.16477	0.446	0.301	4.30905e-91	4	CTSC
1.03771e-93	0.738549	0.288	0.146	2.42669e-89	4	SMS
4.42254e-92	0.6534	0.377	0.204	1.03421e-87	4	MARCKS
5.61389e-88	0.948171	0.554	0.454	1.31281e-83	4	PGK1
1.02818e-87	1.04558	0.572	0.469	2.40441e-83	4	TXN
2.57312e-86	0.718068	0.351	0.2	6.01724e-82	4	ATP6V0D1
3.21923e-86	0.553156	0.333	0.181	7.52818e-82	4	QKI
9.71115e-84	0.931277	0.451	0.312	2.27095e-79	4	SLC2A3
1.40787e-83	0.994473	0.548	0.434	3.29231e-79	4	CALR
2.70819e-80	0.79758	0.297	0.163	6.33311e-76	4	C1orf162
2.36015e-78	0.8118	0.488	0.363	5.51921e-74	4	NOP10
3.48998e-76	0.785417	0.495	0.376	8.16132e-72	4	POMP
1.50702e-75	1.25057	0.288	0.167	3.52416e-71	4	RGCC
3.31251e-74	0.690749	0.261	0.139	7.7463e-70	4	RAP2B
9.41684e-71	0.866798	0.51	0.4	2.20213e-66	4	TUBA1B
1.59594e-67	0.625698	0.3	0.173	3.7321e-63	4	RAB1A
1.07487e-66	0.611187	0.391	0.252	2.51359e-62	4	IFNGR1
1.40856e-65	0.620641	0.482	0.356	3.29392e-61	4	RTN4
1.75224e-65	0.706095	0.403	0.275	4.09761e-61	4	FLNA
2.61902e-65	0.647513	0.437	0.31	6.12458e-61	4	CANX
2.00102e-64	0.77054	0.274	0.159	4.67938e-60	4	AKR1A1
4.54082e-64	0.724315	0.455	0.344	1.06187e-59	4	SNX3
4.10595e-63	0.699535	0.539	0.457	9.60177e-59	4	GNG5
4.00054e-62	0.609319	0.258	0.143	9.35526e-58	4	SERPINB6
4.94875e-62	0.662448	0.375	0.25	1.15727e-57	4	ZFAND5
9.10139e-62	0.638468	0.405	0.268	2.12836e-57	4	TNFRSF1B
2.02903e-61	0.679875	0.456	0.336	4.74488e-57	4	P4HB
4.23e-61	0.747429	0.578	0.511	9.89186e-57	4	CD44
6.49211e-60	0.670556	0.524	0.423	1.51818e-55	4	HSP90B1
1.79691e-59	0.736476	0.441	0.339	4.20208e-55	4	BLOC1S1
5.73404e-59	0.618045	0.573	0.48	1.34091e-54	4	DYNLL1
2.16464e-58	0.526602	0.606	0.524	5.062e-54	4	ZFP36L1
1.6157e-57	0.71477	0.359	0.245	3.77831e-53	4	TUBB
3.81167e-56	0.855261	0.488	0.406	8.91359e-52	4	VAMP8
1.12343e-55	0.727516	0.513	0.42	2.62714e-51	4	EMP3
1.62077e-54	0.669564	0.302	0.195	3.79018e-50	4	NUCB1
3.48128e-54	0.638492	0.382	0.268	8.14097e-50	4	CTNNB1
8.23704e-54	0.609436	0.388	0.273	1.92623e-49	4	RBPJ
5.36227e-51	0.716571	0.279	0.175	1.25397e-46	4	ATP1B3
2.77645e-50	0.656681	0.289	0.188	6.49273e-46	4	PABPC4
1.01082e-48	0.555667	0.253	0.151	2.36381e-44	4	SYNGR2
3.81106e-48	0.517767	0.287	0.178	8.91217e-44	4	GPCPD1
5.37499e-45	0.56223	0.433	0.336	1.25694e-40	4	CD164
5.38243e-45	0.57645	0.253	0.158	1.25868e-40	4	SUMO3
1.37697e-43	0.583996	0.335	0.237	3.22005e-39	4	RHEB
2.64959e-43	0.52518	0.599	0.555	6.19607e-39	4	RHOA
3.01969e-43	0.688553	0.385	0.297	7.06153e-39	4	DPP7
1.27669e-41	0.623877	0.258	0.166	2.98553e-37	4	COMT
2.32144e-41	0.504821	0.671	0.648	5.4287e-37	4	ARPC3
2.50762e-41	1.15155	0.478	0.466	5.86407e-37	4	MIF
2.25061e-39	0.537125	0.274	0.183	5.26306e-35	4	NENF
2.32186e-39	0.698635	0.335	0.248	5.42966e-35	4	RNH1
2.41417e-38	0.573503	0.326	0.234	5.64553e-34	4	ARRDC3
7.29608e-38	0.54373	0.361	0.273	1.70619e-33	4	VDAC1
5.24668e-37	0.665193	0.532	0.498	1.22694e-32	4	PSMA7
1.04728e-36	0.70506	0.474	0.419	2.44906e-32	4	DBI
2.25456e-34	0.618422	0.251	0.17	5.2723e-30	4	SNX2
8.55094e-32	0.575682	0.431	0.362	1.99964e-27	4	SH3BGRL
1.19926e-31	0.520128	0.362	0.277	2.80448e-27	4	GADD45B
1.43685e-31	0.578155	0.252	0.172	3.36008e-27	4	HM13
2.12969e-31	0.532189	0.283	0.201	4.98028e-27	4	SAMHD1
1.6935e-30	0.620899	0.333	0.257	3.96026e-26	4	TNFRSF14
6.57852e-30	0.62484	0.455	0.423	1.53839e-25	4	SEC61G
1.43939e-29	0.976918	0.271	0.199	3.36602e-25	4	IFI6
2.26923e-29	0.638945	0.403	0.345	5.30659e-25	4	CALM3
1.60547e-28	0.552343	0.303	0.227	3.75438e-24	4	C4orf48
7.8471e-28	0.620009	0.261	0.189	1.83504e-23	4	YWHAH
4.12061e-27	0.558124	0.32	0.251	9.63605e-23	4	TCEB1
5.37201e-27	0.627721	0.371	0.287	1.25624e-22	4	HSPB1
9.55832e-26	0.510994	0.298	0.228	2.23521e-21	4	USF2
1.51382e-25	0.592141	0.477	0.458	3.54007e-21	4	C4orf3
2.82569e-24	0.500897	0.326	0.261	6.60788e-20	4	PGAM1
2.39378e-22	0.974886	0.503	0.441	5.59786e-18	4	HSPA1A
6.93006e-21	0.587131	0.339	0.283	1.62059e-16	4	CHCHD10
4.34762e-20	0.513124	0.336	0.28	1.01669e-15	4	SLC3A2
5.42191e-20	0.567878	0.311	0.252	1.26791e-15	4	GLRX
2.5919e-19	0.502015	0.361	0.309	6.06116e-15	4	CLTA
8.54697e-19	0.519899	0.402	0.361	1.99871e-14	4	SEC11A
3.62659e-18	1.52426	0.359	0.324	8.48077e-14	4	MT2A
0	3.7547	0.952	0.308	0	5	LYZ
0	3.46765	0.653	0.036	0	5	FCN1
0	3.29886	0.677	0.067	0	5	VCAN
0	2.8354	0.78	0.177	0	5	AIF1
0	2.65151	0.9	0.413	0	5	CTSS
0	2.45759	0.439	0.03	0	5	MPEG1
0	2.43313	0.466	0.056	0	5	MS4A6A
0	2.40752	0.513	0.07	0	5	CYBB
0	2.39842	0.56	0.122	0	5	FGL2
0	2.26558	0.368	0.023	0	5	CD36
0	2.21527	0.525	0.096	0	5	CD14
0	2.21351	0.463	0.146	0	5	AP1S2
0	2.18246	0.429	0.097	0	5	DUSP6
0	2.13413	0.291	0.025	0	5	LGALS2
0	2.12244	0.358	0.034	0	5	CPVL
0	2.0496	0.468	0.079	0	5	S100A12
0	2.02408	0.921	0.244	0	5	S100A9
0	2.00041	0.644	0.205	0	5	LST1
0	1.99071	0.379	0.064	0	5	CSTA
0	1.9543	0.826	0.362	0	5	CST3
0	1.90848	0.355	0.047	0	5	CFP
0	1.837	0.286	0.027	0	5	CLEC12A
0	1.79069	0.71	0.44	0	5	COTL1
0	1.77065	0.931	0.614	0	5	S100A4
0	1.72136	0.697	0.268	0	5	FCER1G
0	1.72067	0.722	0.413	0	5	PSAP
0	1.68059	0.813	0.336	0	5	TYROBP
0	1.66664	0.308	0.06	0	5	KCTD12
0	1.63391	0.278	0.052	0	5	MS4A7
0	1.4154	0.73	0.294	0	5	HLA-DRA
0	1.20919	0.826	0.194	0	5	S100A8
0	1.16427	0.636	0.173	0	5	MNDA
0	0.957199	0.987	0.9	0	5	ACTB
0	0.64735	0.997	0.949	0	5	FTL
1.61227e-301	1.1553	0.754	0.446	3.7703e-297	5	CD74
4.6146e-263	1.80328	0.339	0.102	1.07912e-258	5	POU2F2
1.14577e-236	1.3192	0.355	0.109	2.67938e-232	5	CLEC7A
4.45832e-232	1.68504	0.587	0.34	1.04258e-227	5	TKT
4.28884e-226	0.613521	0.996	0.944	1.00295e-221	5	TMSB4X
7.85577e-226	1.49813	0.368	0.123	1.83707e-221	5	CFD
1.26241e-224	1.02152	0.817	0.788	2.95214e-220	5	OAZ1
1.14864e-200	1.35311	0.696	0.584	2.68608e-196	5	ARPC1B
1.97476e-188	0.763927	0.859	0.682	4.61799e-184	5	VIM
3.11224e-188	0.545992	0.994	0.931	7.27797e-184	5	MT-CO1
5.46012e-186	1.74804	0.414	0.194	1.27685e-181	5	SAMHD1
4.23592e-185	1.00665	0.607	0.353	9.90569e-181	5	LGALS1
1.2237e-184	1.31509	0.622	0.414	2.86162e-180	5	GPX1
5.45074e-175	1.11424	0.378	0.146	1.27465e-170	5	CD68
9.35482e-173	1.17665	0.707	0.676	2.18763e-168	5	PABPC1
6.17408e-166	1.39525	0.642	0.526	1.44381e-161	5	TSPO
4.19829e-165	1.25111	0.516	0.286	9.8177e-161	5	HLA-DPA1
8.09607e-159	1.18424	0.628	0.446	1.89327e-154	5	BRI3
2.27917e-154	1.2371	0.481	0.258	5.32984e-150	5	GRN
6.99429e-154	1.02332	0.523	0.288	1.63562e-149	5	HLA-DRB1
1.34249e-153	0.992678	0.394	0.161	3.1394e-149	5	NCF2
2.15332e-149	1.57367	0.357	0.162	5.03553e-145	5	C1orf162
5.18821e-149	1.34184	0.551	0.365	1.21326e-144	5	ITGB2
1.54842e-147	1.23682	0.55	0.346	3.62098e-143	5	TYMP
1.92629e-145	0.622536	0.953	0.829	4.50462e-141	5	RPS24
2.10623e-139	1.40053	0.366	0.173	4.92543e-135	5	ZEB2
2.14394e-136	1.12888	0.317	0.127	5.01361e-132	5	FGR
1.32245e-125	1.32703	0.281	0.114	3.09254e-121	5	NUP214
1.07774e-115	0.700142	0.842	0.757	2.52028e-111	5	NACA
3.47129e-115	0.837525	0.733	0.71	8.1176e-111	5	PFDN5
3.83879e-115	0.717914	0.46	0.231	8.97701e-111	5	SERPINA1
1.96533e-114	1.28161	0.264	0.105	4.59592e-110	5	PLBD1
7.69261e-113	1.29291	0.282	0.122	1.79892e-108	5	LTA4H
2.33428e-108	1.15138	0.462	0.284	5.45871e-104	5	HLA-DPB1
1.07094e-104	0.985973	0.29	0.124	2.5044e-100	5	TNFSF13B
4.09375e-104	1.11223	0.476	0.306	9.57324e-100	5	APLP2
6.29043e-102	1.02853	0.654	0.649	1.47102e-97	5	ARPC3
2.45753e-99	0.863537	0.262	0.105	5.74692e-95	5	HCK
5.83297e-98	0.553563	0.789	0.781	1.36404e-93	5	GAPDH
1.10425e-97	1.42891	0.397	0.247	2.58228e-93	5	PYCARD
3.69219e-93	1.28836	0.425	0.276	8.63418e-89	5	FLNA
1.72194e-88	1.11963	0.399	0.243	4.02676e-84	5	CTSZ
9.3431e-87	0.518973	0.901	0.863	2.18488e-82	5	RPS9
8.14755e-83	0.682174	0.717	0.708	1.90531e-78	5	SH3BGRL3
3.84245e-80	0.884927	0.377	0.217	8.98556e-76	5	AMICA1
6.32569e-78	1.13296	0.31	0.17	1.47926e-73	5	BLVRB
8.60729e-75	0.72893	0.353	0.187	2.01281e-70	5	SPI1
1.35197e-74	0.662849	0.644	0.572	3.16159e-70	5	S100A10
1.01932e-73	0.941041	0.568	0.487	2.38367e-69	5	LCP1
1.85311e-70	1.10438	0.382	0.245	4.33351e-66	5	FCGRT
6.62269e-70	0.783654	0.604	0.546	1.54872e-65	5	LAPTM5
7.12987e-68	0.726416	0.687	0.677	1.66732e-63	5	RPL7
7.82412e-68	0.904203	0.554	0.467	1.82967e-63	5	GSTP1
3.44705e-67	0.972321	0.325	0.185	8.06093e-63	5	HLA-DQB1
3.58763e-66	0.594667	0.709	0.726	8.38967e-62	5	CYBA
1.55147e-62	0.970927	0.397	0.271	3.62811e-58	5	TNFRSF1B
4.09379e-61	1.01172	0.319	0.191	9.57333e-57	5	RNF130
1.05827e-59	1.22482	0.295	0.179	2.47477e-55	5	CASP1
4.26027e-55	1.00483	0.273	0.156	9.96264e-51	5	CTSH
1.68912e-54	1.21468	0.446	0.371	3.95e-50	5	AHNAK
6.20088e-54	0.88287	0.559	0.55	1.45008e-49	5	GNAI2
1.56279e-53	0.651351	0.286	0.157	3.65458e-49	5	TNFAIP2
1.02675e-52	0.508105	0.786	0.793	2.40107e-48	5	UBA52
2.1856e-52	1.16898	0.261	0.155	5.11104e-48	5	PLEKHO1
8.8611e-51	0.623671	0.656	0.683	2.07217e-46	5	PFN1
2.56923e-49	0.540911	0.417	0.282	6.00813e-45	5	CEBPD
2.83135e-49	1.08061	0.519	0.512	6.6211e-45	5	SLC25A6
4.35051e-49	0.924207	0.543	0.547	1.01737e-44	5	EIF4A1
2.65196e-48	1.14035	0.437	0.368	6.20162e-44	5	CD48
4.06225e-48	0.907811	0.467	0.385	9.49958e-44	5	TALDO1
9.06863e-43	1.04675	0.297	0.199	2.1207e-38	5	STXBP2
2.48359e-40	1.09126	0.253	0.16	5.80789e-36	5	PPT1
1.39598e-39	0.931478	0.421	0.347	3.2645e-35	5	EVI2B
2.00161e-39	0.695072	0.516	0.466	4.68076e-35	5	ANXA1
4.12077e-37	0.677401	0.616	0.635	9.63641e-33	5	RPL4
5.67705e-36	0.507441	0.481	0.391	1.32758e-31	5	ANXA2
2.8757e-33	0.798307	0.383	0.303	6.72481e-29	5	NPC2
9.50055e-32	0.691841	0.516	0.485	2.2217e-27	5	CORO1A
3.02984e-31	0.677486	0.281	0.185	7.08528e-27	5	LYN
7.46549e-31	0.76861	0.551	0.606	1.74581e-26	5	CALM2
7.92926e-31	0.728735	0.384	0.307	1.85426e-26	5	C10orf54
1.07895e-29	1.08881	0.317	0.253	2.52314e-25	5	GLRX
3.30731e-28	0.71311	0.582	0.649	7.73415e-24	5	COX4I1
4.89917e-28	0.873258	0.442	0.426	1.14567e-23	5	EMP3
1.47246e-27	0.881924	0.4	0.356	3.44335e-23	5	ANXA5
1.77142e-27	0.763432	0.256	0.176	4.14246e-23	5	PTPRE
3.50426e-27	1.10201	0.412	0.397	8.19471e-23	5	PRELID1
2.86841e-26	0.957344	0.301	0.238	6.70778e-22	5	GLIPR1
1.16758e-22	0.857702	0.27	0.206	2.73038e-18	5	PRKCB
2.43833e-22	0.609056	0.599	0.693	5.70204e-18	5	ARPC2
8.20666e-22	0.954712	0.304	0.252	1.91913e-17	5	CARD16
3.11797e-21	0.868972	0.336	0.288	7.29136e-17	5	H2AFY
8.09847e-21	0.719818	0.393	0.347	1.89383e-16	5	EFHD2
1.01644e-20	0.745843	0.52	0.583	2.37695e-16	5	EEF2
1.54323e-20	0.966992	0.373	0.35	3.60884e-16	5	FKBP1A
1.77069e-19	0.605597	0.296	0.233	4.14076e-15	5	LYST
5.29629e-18	0.723024	0.48	0.518	1.23854e-13	5	CD44
1.9692e-16	0.517303	0.415	0.383	4.60498e-12	5	FYB
7.89485e-16	0.851612	0.422	0.44	1.84621e-11	5	ACTR2
1.2709e-15	0.973345	0.291	0.256	2.97201e-11	5	AP2S1
3.29612e-15	0.972599	0.308	0.283	7.70797e-11	5	LAMTOR1
5.82936e-15	0.613564	0.535	0.613	1.3632e-10	5	YBX1
2.28271e-14	0.836681	0.397	0.401	5.33813e-10	5	MSN
2.63458e-14	0.984872	0.268	0.232	6.16096e-10	5	PGLS
5.69462e-14	0.718126	0.299	0.258	1.33169e-09	5	ARRB2
8.25528e-14	0.895869	0.403	0.425	1.9305e-09	5	PTP4A2
1.52753e-12	0.618961	0.481	0.531	3.57212e-08	5	ARPC5
4.71284e-12	1.05408	0.316	0.31	1.1021e-07	5	EIF3L
8.46882e-12	0.845665	0.262	0.231	1.98043e-07	5	CNPY3
1.42657e-11	0.523008	0.48	0.519	3.33603e-07	5	GMFG
2.96581e-11	0.817121	0.352	0.353	6.93554e-07	5	SERPINB1
1.82749e-09	0.685333	0.473	0.561	4.27358e-05	5	YWHAB
3.0929e-09	0.904743	0.293	0.287	7.23275e-05	5	GDI2
8.7409e-08	0.700295	0.453	0.544	0.00204406	5	SERP1
2.50641e-07	0.697966	0.45	0.534	0.00586124	5	TPM3
3.25441e-07	0.58096	0.25	0.224	0.00761044	5	TNFSF10
9.22341e-07	0.51457	0.317	0.304	0.0215689	5	ASAH1
9.67338e-07	0.526411	0.215	0.315	0.0226212	5	SF3B5
3.07611e-06	0.515731	0.182	0.263	0.0719349	5	ATP5A1
0.000195632	0.619791	0.275	0.274	1	5	PTPN6
0.000238919	0.636447	0.26	0.26	1	5	ZFAND5
0.000668179	0.526591	0.346	0.37	1	5	PKM
0.00101741	0.530364	0.3	0.417	1	5	ERP29
0.00120532	0.512954	0.274	0.375	1	5	MTDH
0.00127895	0.560681	0.453	0.565	1	5	RHOA
0.00185927	0.517704	0.213	0.283	1	5	PPP1CA
0.00205721	0.75888	0.247	0.255	1	5	RNH1
0.00251932	0.600205	0.451	0.565	1	5	ATP5G2
0.00279787	0.501603	0.417	0.484	1	5	CD37
0.00366158	0.820222	0.342	0.396	1	5	NAP1L1
0.00477822	0.517307	0.313	0.431	1	5	EIF3H
0.00685378	0.799449	0.241	0.255	1	5	METTL9
0.0093115	0.650968	0.39	0.477	1	5	LAMTOR4
0	7.90867	0.996	0.023	0	6	TPSAB1
0	5.51128	0.983	0.006	0	6	CPA3
0	3.93189	0.813	0.061	0	6	AREG
0	3.56139	0.961	0.007	0	6	KIT
0	3.48575	0.943	0.033	0	6	LTC4S
0	3.41356	0.928	0.005	0	6	GATA2
0	3.33995	0.961	0.006	0	6	HPGDS
0	3.07059	0.931	0.026	0	6	VWA5A
0	3.02798	0.905	0.004	0	6	IL1RL1
0	2.86567	0.312	0.002	0	6	CTSG
0	2.84288	0.888	0.013	0	6	C1orf186
0	2.75643	0.963	0.095	0	6	CLU
0	2.61267	0.847	0.002	0	6	SLC18A2
0	2.53504	0.936	0.207	0	6	RGS1
0	2.49734	0.964	0.185	0	6	CD9
0	2.37386	0.706	0.056	0	6	HPGD
0	2.25824	0.862	0.174	0	6	SOCS1
0	2.13522	0.751	0.004	0	6	RGS13
0	2.13293	0.793	0.001	0	6	RP11-354E11.2
0	2.11707	0.962	0.311	0	6	LAPTM4A
0	2.06848	0.725	0	0	6	MS4A2
0	2.05465	0.555	0.001	0	6	HDC
0	1.97106	0.83	0.281	0	6	CD69
0	1.93029	0.732	0.015	0	6	PTGS1
0	1.8893	0.877	0.194	0	6	LMO4
0	1.88436	0.995	0.678	0	6	VIM
0	1.87729	0.941	0.24	0	6	CAPG
0	1.80666	0.924	0.265	0	6	SAMSN1
0	1.80554	0.653	0.033	0	6	SLC26A2
0	1.71647	0.897	0.406	0	6	JUN
0	1.68919	0.681	0.007	0	6	MAOB
0	1.67338	0.833	0.128	0	6	ARHGAP18
0	1.67052	0.764	0.122	0	6	TSC22D1
0	1.62996	0.556	0.047	0	6	ALAS1
0	1.61936	0.793	0.109	0	6	ACSL4
0	1.61756	0.729	0.043	0	6	BTK
0	1.61614	0.753	0.26	0	6	GADD45B
0	1.61091	0.899	0.333	0	6	HIST1H4C
0	1.60347	0.695	0.148	0	6	LMNA
0	1.60316	0.716	0.044	0	6	RHOBTB3
0	1.59456	0.669	0.12	0	6	NR4A1
0	1.59217	0.786	0.07	0	6	IL18
0	1.58792	0.591	0.005	0	6	SLC45A3
0	1.57306	0.48	0.036	0	6	CPM
0	1.54762	0.889	0.379	0	6	DDIT4
0	1.50184	0.731	0.071	0	6	BMP2K
0	1.48562	0.948	0.445	0	6	ANXA1
0	1.45356	0.79	0.205	0	6	RHOH
0	1.45277	0.608	0.052	0	6	ADRB2
0	1.45122	0.72	0.087	0	6	TMEM176B
0	1.45023	0.728	0.268	0	6	HSPA1B
0	1.44958	0.569	0.009	0	6	SDPR
0	1.4361	0.633	0.107	0	6	NSMCE1
0	1.42978	0.828	0.285	0	6	ID2
0	1.39657	0.671	0.043	0	6	MLPH
0	1.3921	0.673	0.089	0	6	ARHGEF6
0	1.38896	0.92	0.357	0	6	PEBP1
0	1.37878	0.852	0.274	0	6	FOXP1
0	1.37809	0.981	0.573	0	6	CD63
0	1.37747	0.553	0.004	0	6	CNRIP1
0	1.36324	0.701	0.026	0	6	TIMP3
0	1.33178	0.482	0.055	0	6	HES1
0	1.31079	0.576	0.052	0	6	GALC
0	1.30829	0.68	0.099	0	6	BEX4
0	1.30409	0.97	0.342	0	6	ALOX5AP
0	1.29491	0.933	0.506	0	6	NFKBIA
0	1.29244	0.859	0.161	0	6	PLIN2
0	1.28083	0.603	0.03	0	6	RENBP
0	1.27806	0.632	0.084	0	6	FAM46A
0	1.27674	0.73	0.15	0	6	GNPTAB
0	1.27582	0.679	0.094	0	6	STMN1
0	1.26873	0.656	0.055	0	6	BACE2
0	1.26629	0.597	0.082	0	6	GRAP2
0	1.24984	0.826	0.253	0	6	2024-09-02
0	1.23636	0.54	0.063	0	6	LEO1
0	1.23407	0.905	0.41	0	6	AKAP13
0	1.21728	0.629	0.061	0	6	SWAP70
0	1.20989	0.998	0.807	0	6	PTMA
0	1.20364	0.464	0.012	0	6	CTD-3203P2.2
0	1.20319	0.573	0.047	0	6	SMYD3
0	1.19288	0.633	0.1	0	6	CTNNBL1
0	1.18687	0.808	0.354	0	6	PPP1R15A
0	1.16417	0.445	0.003	0	6	CALB2
0	1.16145	0.981	0.645	0	6	RPL23
0	1.15599	0.995	0.759	0	6	RPL37A
0	1.13842	0.967	0.26	0	6	FCER1G
0	1.13762	0.54	0.147	0	6	GPR65
0	1.13752	0.591	0.062	0	6	LYL1
0	1.12722	0.892	0.324	0	6	ATP6V1F
0	1.12423	0.909	0.415	0	6	FXYD5
0	1.11943	0.524	0.11	0	6	BATF
0	1.11582	0.972	0.589	0	6	UBB
0	1.1066	0.5	0.029	0	6	PBX1
0	1.09121	0.488	0.027	0	6	NFE2L3
0	1.0892	0.785	0.244	0	6	RGS10
0	1.08779	0.917	0.375	0	6	CKLF
0	1.08614	0.513	0.047	0	6	ATP6V0A2
0	1.08021	0.611	0.089	0	6	SLC44A1
0	1.07636	0.458	0.021	0	6	ACOT7
0	1.06266	0.837	0.375	0	6	FOSB
0	1.06036	0.664	0.212	0	6	EGR1
0	1.05426	0.564	0.101	0	6	PRKCA
0	1.05283	0.638	0.071	0	6	RAB32
0	1.05131	0.626	0.188	0	6	SYAP1
0	1.04968	0.367	0.016	0	6	SMIM1
0	1.04818	0.986	0.667	0	6	RPL36AL
0	1.04283	0.437	0.015	0	6	STXBP6
0	1.0422	0.451	0.006	0	6	GMPR
0	1.03864	0.622	0.121	0	6	CD84
0	1.03374	0.462	0.032	0	6	RAB27B
0	1.03182	0.449	0.056	0	6	LAX1
0	1.03166	0.372	0.004	0	6	CADPS
0	1.03122	0.367	0.036	0	6	CSF1
0	1.02153	0.546	0.04	0	6	PMP22
0	1.01693	0.498	0.063	0	6	TESPA1
0	1.01442	0.605	0.092	0	6	SOX4
0	1.01145	0.356	0.003	0	6	CTTNBP2
0	1.01121	0.372	0.012	0	6	LIF
0	1.00952	0.432	0.055	0	6	TDRD3
0	0.997719	0.584	0.056	0	6	ALDH1A1
0	0.996797	0.515	0.053	0	6	MSRA
0	0.990753	0.394	0.001	0	6	GCSAML
0	0.976775	0.689	0.122	0	6	ALOX5
0	0.976662	0.655	0.097	0	6	LAT2
0	0.963801	0.364	0.005	0	6	FCER1A
0	0.961537	0.689	0.153	0	6	CD82
0	0.960838	0.922	0.435	0	6	RAC2
0	0.953688	0.493	0.055	0	6	ZNRF1
0	0.946369	0.66	0.146	0	6	BHLHE40
0	0.933298	0.404	0.015	0	6	HS6ST1
0	0.932614	0.831	0.336	0	6	C12orf57
0	0.928481	0.977	0.608	0	6	CLIC1
0	0.917902	0.937	0.356	0	6	GLUL
0	0.915926	0.389	0.006	0	6	FAM212A
0	0.915703	0.416	0.027	0	6	FER
0	0.906969	0.564	0.169	0	6	SERTAD1
0	0.895045	0.667	0.156	0	6	METRNL
0	0.893662	0.357	0	0	6	CDK15
0	0.889553	0.38	0.009	0	6	TMEM44
0	0.880942	0.683	0.148	0	6	C1orf162
0	0.877649	0.42	0.015	0	6	FERMT2
0	0.876204	0.604	0.149	0	6	PHF20
0	0.872322	0.589	0.075	0	6	LPCAT2
0	0.870152	0.848	0.277	0	6	ASAH1
0	0.867625	0.641	0.208	0	6	IER5
0	0.840811	0.493	0.085	0	6	PLGRKT
0	0.840343	0.997	0.836	0	6	H3F3B
0	0.839381	0.477	0.083	0	6	TSEN54
0	0.837416	0.27	0.022	0	6	C19orf83
0	0.831207	0.374	0.03	0	6	HS3ST1
0	0.824503	0.413	0.078	0	6	IL18R1
0	0.821187	0.996	0.822	0	6	RPL34
0	0.812483	0.429	0.05	0	6	SNX29
0	0.808809	0.931	0.286	0	6	RGS2
0	0.807004	0.4	0.034	0	6	P2RX1
0	0.802858	0.995	0.814	0	6	RPL11
0	0.801805	0.57	0.114	0	6	DDAH2
0	0.801478	0.524	0.092	0	6	LAIR1
0	0.800945	0.45	0.071	0	6	CNST
0	0.798173	0.44	0.072	0	6	AHI1
0	0.790039	0.316	0.003	0	6	KCNH2
0	0.788636	0.42	0.052	0	6	SLC11A2
0	0.78747	0.426	0.066	0	6	TNIK
0	0.786035	0.316	0.001	0	6	TCTEX1D1
0	0.785182	0.468	0.084	0	6	RHBDD2
0	0.782096	0.408	0.054	0	6	HLTF
0	0.781566	0.565	0.166	0	6	LAT
0	0.779468	0.311	0.011	0	6	P2RY14
0	0.777902	0.433	0.048	0	6	C10orf128
0	0.777501	0.425	0.041	0	6	ACER3
0	0.76914	0.656	0.142	0	6	ITM2C
0	0.768224	0.402	0.07	0	6	NMT2
0	0.764876	0.353	0.02	0	6	CD22
0	0.764236	0.276	0.001	0	6	TMEM233
0	0.762841	0.416	0.038	0	6	RAB34
0	0.756387	0.527	0.13	0	6	PRNP
0	0.754622	0.384	0.03	0	6	DHRS9
0	0.75327	0.713	0.265	0	6	AP2M1
0	0.750109	0.314	0.004	0	6	EMID1
0	0.749355	0.495	0.071	0	6	CCDC88A
0	0.748431	0.95	0.544	0	6	HSP90AB1
0	0.739325	0.811	0.313	0	6	BST2
0	0.739136	0.33	0.032	0	6	RP11-620J15.3
0	0.737116	0.357	0.045	0	6	C1orf228
0	0.733283	0.354	0.015	0	6	CATSPER1
0	0.733252	0.385	0.03	0	6	ST3GAL4
0	0.728046	0.289	0.001	0	6	RP11-557H15.4
0	0.723275	0.312	0.01	0	6	DLC1
0	0.722961	0.393	0.062	0	6	MAML1
0	0.717985	0.326	0.021	0	6	TMEM220
0	0.717806	0.451	0.1	0	6	KCNQ1OT1
0	0.71139	0.561	0.123	0	6	VEGFA
0	0.710267	0.575	0.131	0	6	SERPINB6
0	0.709462	0.364	0.034	0	6	FHL3
0	0.705846	0.58	0.178	0	6	EPB41L4A-AS1
0	0.702087	0.332	0.028	0	6	CHN2
0	0.698561	0.281	0.001	0	6	NTRK1
0	0.696114	0.282	0.005	0	6	KIAA1549
0	0.695138	0.366	0.036	0	6	SPECC1
0	0.695136	0.565	0.148	0	6	CPEB4
0	0.691598	0.309	0.035	0	6	GALNT6
0	0.691091	0.345	0.034	0	6	KIAA1522
0	0.68654	0.363	0.054	0	6	MAST4
0	0.683055	0.344	0.029	0	6	PKIG
0	0.680785	0.382	0.02	0	6	CD33
0	0.680752	0.297	0.009	0	6	PROCR
0	0.679808	0.479	0.113	0	6	ARMCX3
0	0.677764	0.323	0.02	0	6	MITF
0	0.669035	0.704	0.173	0	6	RNF130
0	0.66201	0.959	0.491	0	6	CTSD
0	0.656574	0.64	0.136	0	6	STX3
0	0.652275	0.493	0.103	0	6	SPATS2L
0	0.650482	0.995	0.619	0	6	SRGN
0	0.645113	0.389	0.059	0	6	RAB37
0	0.644159	0.374	0.076	0	6	SLC1A5
0	0.640231	0.394	0.065	0	6	TMEM176A
0	0.633264	0.507	0.136	0	6	PARP4
0	0.62774	0.371	0.05	0	6	PARVB
0	0.626041	0.295	0.02	0	6	IFITM10
0	0.624896	0.485	0.111	0	6	HSD17B12
0	0.620572	0.379	0.052	0	6	BLVRA
0	0.62053	0.654	0.212	0	6	C4orf48
0	0.618698	0.287	0.032	0	6	ANKRD9
0	0.615	0.291	0.015	0	6	ASRGL1
0	0.609493	0.269	0.017	0	6	ALS2
0	0.605259	0.306	0.051	0	6	PRPS2
0	0.603846	0.374	0.067	0	6	CTD-2336O2.1
0	0.603095	0.389	0.075	0	6	SPG20
0	0.60234	0.467	0.083	0	6	TESC
0	0.599349	0.266	0.011	0	6	ADAM12
0	0.59399	0.346	0.055	0	6	UBA7
0	0.587789	0.38	0.069	0	6	NRIP1
0	0.58226	0.456	0.105	0	6	CHPT1
0	0.581779	0.252	0.01	0	6	NDST2
0	0.574786	0.351	0.061	0	6	PDCL
0	0.574305	0.294	0.031	0	6	CHKA
0	0.573299	0.335	0.06	0	6	NDFIP2
0	0.572094	0.291	0.023	0	6	MEIS2
0	0.569316	0.456	0.113	0	6	GATAD1
0	0.566765	0.589	0.131	0	6	IRS2
0	0.552273	0.265	0.035	0	6	FAM43A
0	0.552167	0.374	0.065	0	6	VAT1
0	0.543472	0.918	0.402	0	6	GPX1
0	0.533023	0.4	0.085	0	6	KLRG1
0	0.526602	0.287	0.05	0	6	SMAD7
0	0.519993	0.341	0.069	0	6	NUDT14
0	0.516437	0.264	0.019	0	6	EPB41L1
0	0.510681	0.332	0.05	0	6	FAM129B
0	0.506735	0.254	0.019	0	6	ZNF704
0	0.501161	0.444	0.079	0	6	ABCA1
0	0.501114	0.271	0.032	0	6	NDRG2
6.99265e-300	0.905687	0.913	0.496	1.63523e-295	6	CD44
9.04338e-299	0.688343	0.6	0.189	2.11479e-294	6	ITM2A
4.60674e-298	0.601422	0.39	0.091	1.07729e-293	6	PEF1
1.56224e-297	0.766562	0.998	0.869	3.6533e-293	6	EEF1A1
1.94743e-297	0.736572	0.88	0.41	4.55407e-293	6	CD81
4.18151e-293	0.68397	0.843	0.343	9.77846e-289	6	LDHB
4.58225e-293	0.633735	0.531	0.16	1.07156e-288	6	RPL7L1
1.9034e-292	0.636337	0.347	0.075	4.45111e-288	6	PRKX
9.22819e-292	0.75795	0.769	0.317	2.15801e-287	6	PRDX6
2.43743e-290	0.776588	0.994	0.742	5.69992e-286	6	RPL24
5.72358e-289	0.638384	0.601	0.195	1.33846e-284	6	RASSF5
1.1983e-288	0.652195	0.54	0.166	2.80223e-284	6	CRBN
2.30592e-287	0.783493	0.92	0.458	5.39239e-283	6	CD37
3.60434e-285	0.605483	0.464	0.128	8.42874e-281	6	MAGED2
5.33015e-284	0.502378	0.426	0.108	1.24645e-279	6	TCEAL4
8.5993e-284	0.536286	0.27	0.048	2.01095e-279	6	CD38
2.43711e-282	0.744108	0.987	0.751	5.69919e-278	6	NACA
2.00716e-278	0.795148	0.841	0.384	4.69375e-274	6	SNHG8
5.05755e-278	0.602979	0.561	0.169	1.18271e-273	6	SYTL3
2.32774e-277	0.947632	0.917	0.51	5.44342e-273	6	ZFP36
2.12756e-276	0.506591	0.347	0.077	4.9753e-272	6	MUM1
1.27102e-275	0.716341	0.992	0.838	2.97227e-271	6	FAU
2.57333e-274	0.66769	0.791	0.343	6.01773e-270	6	SEC11A
1.32679e-273	0.867681	0.933	0.516	3.1027e-269	6	NDUFA4
2.79727e-273	0.513455	0.343	0.076	6.54142e-269	6	FBXO34
1.26259e-270	0.521334	0.369	0.085	2.95256e-266	6	SYTL2
5.63878e-270	0.977146	0.943	0.569	1.31863e-265	6	TSC22D3
2.74049e-269	1.44362	0.832	0.427	6.40863e-265	6	HSPA1A
7.18022e-269	0.580985	0.447	0.12	1.67909e-264	6	AHR
5.86844e-267	0.523557	0.327	0.072	1.37234e-262	6	PHYH
6.03558e-267	0.772103	0.994	0.771	1.41142e-262	6	RPL26
1.98418e-264	0.545166	0.419	0.113	4.64e-260	6	ATXN10
7.10843e-264	0.790815	0.957	0.53	1.66231e-259	6	ARHGDIB
3.95408e-259	0.577297	0.56	0.183	9.24662e-255	6	MAT2A
5.56767e-257	0.553149	0.461	0.135	1.302e-252	6	SNX5
1.28127e-256	0.508971	0.401	0.103	2.99625e-252	6	NDEL1
9.51655e-253	0.531105	0.365	0.091	2.22545e-248	6	CCDC104
4.39063e-252	0.564324	0.473	0.143	1.02675e-247	6	LSM2
2.08398e-250	0.769456	0.441	0.131	4.87339e-246	6	WDR74
2.81016e-248	0.695211	0.802	0.354	6.57156e-244	6	AHNAK
4.56832e-247	0.722837	0.992	0.751	1.0683e-242	6	RPL14
3.64911e-246	0.754623	0.939	0.539	8.53345e-242	6	ATP5G2
8.5804e-245	0.647399	0.533	0.177	2.00653e-240	6	INTS6
3.81699e-242	0.538267	0.696	0.271	8.92602e-238	6	OSBPL8
2.31242e-238	0.646325	0.597	0.222	5.40759e-234	6	SNHG7
3.73291e-238	0.537757	0.391	0.108	8.72941e-234	6	RNASEH2B
1.15854e-237	0.715393	0.99	0.702	2.70925e-233	6	RPL22
3.10259e-236	0.549302	0.756	0.32	7.25541e-232	6	EID1
3.68493e-236	0.711795	0.528	0.184	8.61721e-232	6	UBE2S
6.14191e-236	0.502108	0.62	0.229	1.43629e-231	6	M6PR
5.35039e-235	0.534776	0.495	0.158	1.25119e-230	6	HEXIM1
7.21149e-235	0.568715	0.625	0.239	1.68641e-230	6	FXR1
1.59864e-234	0.729615	0.974	0.617	3.73842e-230	6	MT-ND4L
1.10744e-233	0.690235	0.729	0.318	2.58974e-229	6	SELK
2.03595e-229	0.780133	0.934	0.548	4.76107e-225	6	RPS20
8.71154e-229	0.617543	0.69	0.284	2.03719e-224	6	COX17
3.29453e-227	0.722361	0.956	0.544	7.70427e-223	6	RPL31
3.5598e-227	0.550356	0.553	0.192	8.32459e-223	6	IDI1
5.17182e-222	0.645645	0.677	0.285	1.20943e-217	6	RBMX
1.0663e-220	0.529233	0.487	0.162	2.49354e-216	6	MAPRE1
1.15141e-220	0.703467	0.955	0.648	2.69258e-216	6	HNRNPA2B1
4.59172e-220	0.698333	0.991	0.719	1.07377e-215	6	RPL5
1.52668e-218	0.831759	0.482	0.166	3.57014e-214	6	NR4A2
4.42024e-218	0.730992	0.541	0.192	1.03367e-213	6	MIR24-2
2.28973e-215	0.555229	0.868	0.405	5.35453e-211	6	EMP3
1.36143e-213	0.578495	0.991	0.773	3.18371e-209	6	MT-ND5
1.70097e-213	0.507035	0.427	0.134	3.97772e-209	6	FUNDC2
2.33054e-213	1.07471	0.966	0.721	5.44997e-209	6	HSP90AA1
1.50169e-212	0.837904	0.722	0.334	3.5117e-208	6	DNAJB1
9.19693e-212	0.594422	0.73	0.331	2.1507e-207	6	ST13
1.36637e-206	0.57801	0.351	0.098	3.19525e-202	6	SIK1
7.51308e-206	0.942897	0.764	0.407	1.75693e-201	6	DNAJA1
1.49429e-205	0.640054	0.765	0.36	3.49439e-201	6	NSA2
1.05099e-204	0.50208	0.321	0.085	2.45775e-200	6	C15orf61
1.77014e-204	0.550977	0.751	0.344	4.13946e-200	6	DRAP1
9.21502e-204	0.571405	0.744	0.345	2.15493e-199	6	NUCKS1
1.04286e-203	0.559009	0.757	0.355	2.43872e-199	6	VPS28
3.25755e-202	0.508469	0.713	0.315	7.61777e-198	6	WDR83OS
5.78924e-199	0.599645	0.993	0.833	1.35381e-194	6	RPL37
1.77377e-196	0.555357	0.701	0.312	4.14797e-192	6	CBX3
2.00123e-195	0.583557	0.795	0.398	4.67988e-191	6	EIF4B
4.55343e-193	0.609928	0.997	0.85	1.06482e-188	6	RPL30
8.36877e-193	0.65158	0.998	0.944	1.95704e-188	6	MT-ND3
1.42929e-192	0.617804	0.913	0.519	3.3424e-188	6	CIRBP
3.75874e-191	0.579199	0.923	0.538	8.78982e-187	6	SUMO2
1.49327e-190	0.600524	0.39	0.124	3.49202e-186	6	HIST1H1D
1.56479e-190	0.605864	0.993	0.768	3.65927e-186	6	RPL35A
1.76236e-189	0.527698	0.695	0.316	4.12127e-185	6	EIF3D
3.58472e-189	0.586592	0.312	0.082	8.38287e-185	6	CD83
6.63914e-187	0.579399	0.996	0.796	1.55256e-182	6	RPS23
5.37592e-186	0.511896	0.788	0.39	1.25716e-181	6	ARL6IP4
2.37739e-185	0.714104	0.44	0.153	5.55952e-181	6	CREM
1.00956e-184	0.54425	0.477	0.173	2.36085e-180	6	SETD5-AS1
7.07988e-184	0.544439	0.994	0.826	1.65563e-179	6	RPL32
4.08952e-182	0.563871	0.762	0.38	9.56334e-178	6	EIF5
2.97139e-178	0.635076	0.985	0.711	6.94859e-174	6	RPL38
9.70518e-175	0.79059	0.951	0.681	2.26956e-170	6	JUND
2.22706e-173	0.514453	0.558	0.225	5.20798e-169	6	NFKBIZ
4.92748e-173	0.502671	0.85	0.456	1.15229e-168	6	UQCRH
3.46583e-170	0.531178	0.582	0.234	8.10484e-166	6	REL
1.58397e-168	0.631398	0.975	0.672	3.70411e-164	6	RPS26
1.69913e-168	0.533938	0.642	0.292	3.97343e-164	6	TUBB4B
3.81306e-167	0.626879	0.936	0.582	8.91684e-163	6	HNRNPA1
7.73595e-166	0.586901	0.992	0.755	1.80905e-161	6	RPS25
2.5768e-164	0.539834	0.96	0.62	6.02585e-160	6	SRP14
[truncated: 5,855 more rows]

## Sheet: S4
Supplementary Table 4. List of differentially expressed genes over the pseudotime from original to malignant transition
	status	family	pval	qval	gene_short_name	use_for_ordering
CD55	OK	negbinomial.size	0	0	CD55	TRUE
ANXA4	OK	negbinomial.size	0	0	ANXA4	TRUE
CLDN18	OK	negbinomial.size	0	0	CLDN18	TRUE
SPINK1	OK	negbinomial.size	0	0	SPINK1	TRUE
HSP90AB1	OK	negbinomial.size	0	0	HSP90AB1	TRUE
LCN2	OK	negbinomial.size	0	0	LCN2	TRUE
CEACAM5	OK	negbinomial.size	0	0	CEACAM5	TRUE
MT-ND1	OK	negbinomial.size	0	0	MT-ND1	TRUE
MT-ND2	OK	negbinomial.size	0	0	MT-ND2	TRUE
MT-CO1	OK	negbinomial.size	0	0	MT-CO1	TRUE
MT-CO2	OK	negbinomial.size	0	0	MT-CO2	TRUE
MT-ATP6	OK	negbinomial.size	0	0	MT-ATP6	TRUE
MT-CO3	OK	negbinomial.size	0	0	MT-CO3	TRUE
MT-ND3	OK	negbinomial.size	0	0	MT-ND3	TRUE
MT-ND4	OK	negbinomial.size	0	0	MT-ND4	TRUE
MT-ND5	OK	negbinomial.size	0	0	MT-ND5	TRUE
MT-CYB	OK	negbinomial.size	0	0	MT-CYB	TRUE
PIGR	OK	negbinomial.size	8.38463e-300	1.0893e-296	PIGR	TRUE
TM4SF4	OK	negbinomial.size	5.64303e-287	6.94538e-284	TM4SF4	TRUE
TM4SF1	OK	negbinomial.size	1.23417e-267	1.44305e-264	TM4SF1	TRUE
SLC40A1	OK	negbinomial.size	5.58844e-222	6.22313e-219	SLC40A1	TRUE
MYL12A	OK	negbinomial.size	2.80594e-216	2.98258e-213	MYL12A	TRUE
CLDN4	OK	negbinomial.size	8.65172e-216	8.79655e-213	CLDN4	TRUE
RPS26	OK	negbinomial.size	1.03661e-214	1.01005e-211	RPS26	TRUE
REG4	OK	negbinomial.size	5.65089e-211	5.28584e-208	REG4	TRUE
UBC	OK	negbinomial.size	3.88804e-203	3.49699e-200	UBC	TRUE
TMSB10	OK	negbinomial.size	1.15864e-200	1.00351e-197	TMSB10	TRUE
LMO7	OK	negbinomial.size	3.04545e-194	2.54349e-191	LMO7	TRUE
LAMB3	OK	negbinomial.size	1.54795e-178	1.24824e-175	LAMB3	TRUE
CD74	OK	negbinomial.size	1.55124e-158	1.20919e-155	CD74	TRUE
MSLN	OK	negbinomial.size	6.56777e-156	4.95443e-153	MSLN	TRUE
RPS5	OK	negbinomial.size	3.02712e-155	2.21216e-152	RPS5	TRUE
TFF1	OK	negbinomial.size	4.432e-155	3.14068e-152	TFF1	TRUE
VEGFA	OK	negbinomial.size	1.47759e-154	1.01628e-151	VEGFA	TRUE
CLTB	OK	negbinomial.size	1.9422e-154	1.29767e-151	CLTB	TRUE
HSPA6	OK	negbinomial.size	4.15781e-150	2.70084e-147	HSPA6	TRUE
CEACAM7	OK	negbinomial.size	5.67594e-148	3.58735e-145	CEACAM7	TRUE
CLU	OK	negbinomial.size	1.27431e-146	7.84205e-144	CLU	TRUE
HSPB1	OK	negbinomial.size	5.88154e-145	3.52666e-142	HSPB1	TRUE
MUC13	OK	negbinomial.size	1.53948e-144	9.00021e-142	MUC13	TRUE
IGFBP3	OK	negbinomial.size	6.57901e-144	3.75244e-141	IGFBP3	TRUE
CD63	OK	negbinomial.size	1.24205e-142	6.91554e-140	CD63	TRUE
EIF1	OK	negbinomial.size	2.43343e-141	1.32339e-138	EIF1	TRUE
TXNIP	OK	negbinomial.size	7.1182e-136	3.78316e-133	TXNIP	TRUE
CLDN10	OK	negbinomial.size	1.1029e-135	5.73139e-133	CLDN10	TRUE
PPP1R15A	OK	negbinomial.size	1.5856e-132	8.06071e-130	PPP1R15A	TRUE
MYL6	OK	negbinomial.size	4.27036e-129	2.12473e-126	MYL6	TRUE
HSP90AA1	OK	negbinomial.size	5.43583e-128	2.64827e-125	HSP90AA1	TRUE
TMEM238	OK	negbinomial.size	1.37258e-126	6.55054e-124	TMEM238	TRUE
PMEPA1	OK	negbinomial.size	2.17555e-125	1.01751e-122	PMEPA1	TRUE
RPL13A	OK	negbinomial.size	2.21492e-124	1.01561e-121	RPL13A	TRUE
ANXA1	OK	negbinomial.size	3.16573e-121	1.42367e-118	ANXA1	TRUE
ZFAS1	OK	negbinomial.size	2.23094e-119	9.84351e-117	ZFAS1	TRUE
MUC1	OK	negbinomial.size	1.79928e-117	7.7919e-115	MUC1	TRUE
KRT17	OK	negbinomial.size	8.14639e-117	3.4637e-114	KRT17	TRUE
RPS19	OK	negbinomial.size	6.81569e-116	2.84616e-113	RPS19	TRUE
HIST1H1C	OK	negbinomial.size	5.8925e-112	2.41748e-109	HIST1H1C	TRUE
HIST2H2AA3	OK	negbinomial.size	7.07313e-112	2.85181e-109	HIST2H2AA3	TRUE
ERO1L	OK	negbinomial.size	1.22924e-111	4.87217e-109	ERO1L	TRUE
IGFBP6	OK	negbinomial.size	3.47702e-111	1.35517e-108	IGFBP6	TRUE
S100A10	OK	negbinomial.size	1.21499e-110	4.6578e-108	S100A10	TRUE
CTSC	OK	negbinomial.size	6.41709e-110	2.42038e-107	CTSC	TRUE
RAB11FIP1	OK	negbinomial.size	6.75541e-110	2.50754e-107	RAB11FIP1	TRUE
MAP1LC3B	OK	negbinomial.size	7.42499e-110	2.71302e-107	MAP1LC3B	TRUE
MMP7	OK	negbinomial.size	1.17938e-107	4.24305e-105	MMP7	TRUE
C12orf75	OK	negbinomial.size	5.01069e-105	1.77538e-102	C12orf75	TRUE
CXCL5	OK	negbinomial.size	2.71583e-104	9.47904e-102	CXCL5	TRUE
GADD45B	OK	negbinomial.size	1.07303e-101	3.69012e-99	GADD45B	TRUE
HSPA1A	OK	negbinomial.size	1.1417e-101	3.86937e-99	HSPA1A	TRUE
IFITM2	OK	negbinomial.size	1.40622e-101	4.69779e-99	IFITM2	TRUE
G0S2	OK	negbinomial.size	1.72285e-101	5.6745e-99	G0S2	TRUE
SAT1	OK	negbinomial.size	9.19589e-101	2.98675e-98	SAT1	TRUE
RIOK3	OK	negbinomial.size	1.28228e-100	4.10767e-98	RIOK3	FALSE
RPL7A	OK	negbinomial.size	7.24671e-100	2.29006e-97	RPL7A	TRUE
LGALS3	OK	negbinomial.size	8.2941e-100	2.5861e-97	LGALS3	TRUE
DHRS9	OK	negbinomial.size	1.17652e-97	3.62012e-95	DHRS9	TRUE
DST	OK	negbinomial.size	8.98091e-97	2.72751e-94	DST	TRUE
LAMC2	OK	negbinomial.size	3.07832e-96	9.22904e-94	LAMC2	TRUE
RPL19	OK	negbinomial.size	1.41282e-95	4.18211e-93	RPL19	TRUE
KCNE3	OK	negbinomial.size	3.31607e-95	9.69329e-93	KCNE3	TRUE
FTH1	OK	negbinomial.size	1.00643e-94	2.90559e-92	FTH1	TRUE
DDIT4	OK	negbinomial.size	3.8216e-94	1.08986e-91	DDIT4	TRUE
HBA2	OK	negbinomial.size	5.89317e-94	1.66038e-91	HBA2	TRUE
NDRG1	OK	negbinomial.size	5.30345e-92	1.47644e-89	NDRG1	TRUE
DDIT3	OK	negbinomial.size	5.89424e-92	1.62161e-89	DDIT3	TRUE
PLAUR	OK	negbinomial.size	2.64433e-90	7.19043e-88	PLAUR	TRUE
RND3	OK	negbinomial.size	6.74982e-90	1.8143e-87	RND3	TRUE
RPS11	OK	negbinomial.size	7.32533e-90	1.94662e-87	RPS11	FALSE
S100A11	OK	negbinomial.size	1.15156e-89	3.02574e-87	S100A11	TRUE
NACA	OK	negbinomial.size	2.84733e-89	7.39832e-87	NACA	TRUE
RPL23	OK	negbinomial.size	2.10259e-87	5.40318e-85	RPL23	TRUE
C12orf36	OK	negbinomial.size	1.78232e-85	4.5304e-83	C12orf36	FALSE
MT-ND6	OK	negbinomial.size	1.72922e-84	4.34815e-82	MT-ND6	TRUE
ATF3	OK	negbinomial.size	3.51904e-84	8.75454e-82	ATF3	TRUE
TACSTD2	OK	negbinomial.size	5.36909e-84	1.32164e-81	TACSTD2	TRUE
CSF3R	OK	negbinomial.size	4.40612e-83	1.0733e-80	CSF3R	TRUE
SEPW1	OK	negbinomial.size	9.56791e-83	2.30666e-80	SEPW1	FALSE
S100A2	OK	negbinomial.size	6.45824e-82	1.54108e-79	S100A2	TRUE
LMO4	OK	negbinomial.size	1.46187e-81	3.45311e-79	LMO4	TRUE
B2M	OK	negbinomial.size	3.20848e-81	7.50304e-79	B2M	TRUE
SLC3A1	OK	negbinomial.size	2.18032e-80	5.0482e-78	SLC3A1	FALSE
MALAT1	OK	negbinomial.size	3.49467e-80	8.01204e-78	MALAT1	TRUE
F3	OK	negbinomial.size	1.5309e-78	3.47574e-76	F3	TRUE
CXCL17	OK	negbinomial.size	1.97001e-78	4.42968e-76	CXCL17	TRUE
C19orf33	OK	negbinomial.size	1.03615e-77	2.30765e-75	C19orf33	TRUE
P4HA1	OK	negbinomial.size	4.76868e-77	1.05203e-74	P4HA1	FALSE
MACROD2	OK	negbinomial.size	1.18858e-75	2.59765e-73	MACROD2	TRUE
DYNLRB1	OK	negbinomial.size	1.64375e-74	3.55917e-72	DYNLRB1	FALSE
COL17A1	OK	negbinomial.size	1.2802e-73	2.74656e-71	COL17A1	TRUE
HLA-DRB5	OK	negbinomial.size	1.11968e-72	2.38033e-70	HLA-DRB5	TRUE
ARF1	OK	negbinomial.size	1.28353e-71	2.70408e-69	ARF1	FALSE
ADM	OK	negbinomial.size	5.62944e-71	1.1754e-68	ADM	FALSE
RPSA	OK	negbinomial.size	1.1913e-70	2.46536e-68	RPSA	TRUE
MT-ATP8	OK	negbinomial.size	2.55164e-70	5.23422e-68	MT-ATP8	TRUE
SPRR3	OK	negbinomial.size	3.45853e-70	7.03285e-68	SPRR3	FALSE
SDCBP2	OK	negbinomial.size	4.80205e-70	9.68068e-68	SDCBP2	FALSE
PTTG1IP	OK	negbinomial.size	5.49459e-70	1.09821e-67	PTTG1IP	FALSE
ITGB1	OK	negbinomial.size	6.2636e-70	1.24131e-67	ITGB1	TRUE
MIR4435-1HG	OK	negbinomial.size	7.71496e-70	1.51609e-67	MIR4435-1HG	FALSE
IGJ	OK	negbinomial.size	2.17126e-69	4.23124e-67	IGJ	TRUE
HBB	OK	negbinomial.size	6.54964e-69	1.25683e-66	HBB	TRUE
GATM	OK	negbinomial.size	6.55692e-69	1.25683e-66	GATM	TRUE
DNAJB1	OK	negbinomial.size	8.66107e-69	1.64666e-66	DNAJB1	TRUE
SOX4	OK	negbinomial.size	1.45212e-68	2.73854e-66	SOX4	TRUE
MIEN1	OK	negbinomial.size	1.91274e-67	3.57835e-65	MIEN1	TRUE
ATP1A1	OK	negbinomial.size	5.06705e-67	9.4042e-65	ATP1A1	TRUE
PI3	OK	negbinomial.size	6.20492e-67	1.14253e-64	PI3	TRUE
DMBT1	OK	negbinomial.size	1.83897e-66	3.35971e-64	DMBT1	TRUE
CRIP1	OK	negbinomial.size	2.05191e-66	3.71968e-64	CRIP1	TRUE
GPX2	OK	negbinomial.size	6.54548e-66	1.17743e-63	GPX2	TRUE
TINAGL1	OK	negbinomial.size	9.10151e-66	1.62472e-63	TINAGL1	TRUE
SAA1	OK	negbinomial.size	1.63616e-65	2.8986e-63	SAA1	FALSE
DUOX2	OK	negbinomial.size	3.37317e-65	5.93094e-63	DUOX2	TRUE
SERP1	OK	negbinomial.size	1.11964e-64	1.95394e-62	SERP1	FALSE
GRB7	OK	negbinomial.size	1.54109e-64	2.66952e-62	GRB7	FALSE
MUC20	OK	negbinomial.size	2.39257e-64	4.09455e-62	MUC20	FALSE
RPL29	OK	negbinomial.size	2.39877e-64	4.09455e-62	RPL29	FALSE
SEC61G	OK	negbinomial.size	4.30299e-64	7.2917e-62	SEC61G	FALSE
FXYD5	OK	negbinomial.size	7.05421e-64	1.18678e-61	FXYD5	FALSE
TFF2	OK	negbinomial.size	9.45158e-64	1.57875e-61	TFF2	TRUE
ASS1	OK	negbinomial.size	1.09137e-63	1.81005e-61	ASS1	TRUE
SLPI	OK	negbinomial.size	4.11044e-63	6.7692e-61	SLPI	TRUE
IGFBP1	OK	negbinomial.size	4.60377e-63	7.52862e-61	IGFBP1	FALSE
EMP3	OK	negbinomial.size	7.1946e-63	1.16837e-60	EMP3	TRUE
TIMP1	OK	negbinomial.size	1.48171e-62	2.38963e-60	TIMP1	TRUE
SERPINA1	OK	negbinomial.size	4.24099e-62	6.79284e-60	SERPINA1	TRUE
CDKN1A	OK	negbinomial.size	4.98632e-62	7.93233e-60	CDKN1A	FALSE
RPL22L1	OK	negbinomial.size	5.02154e-62	7.93438e-60	RPL22L1	TRUE
RP11-338I21.1	OK	negbinomial.size	7.24229e-62	1.13665e-59	RP11-338I21.1	TRUE
RPL24	OK	negbinomial.size	8.96828e-62	1.39816e-59	RPL24	TRUE
SH3BGRL3	OK	negbinomial.size	1.75666e-61	2.7205e-59	SH3BGRL3	TRUE
CAST	OK	negbinomial.size	2.13314e-61	3.2818e-59	CAST	FALSE
RP11-462G2.1	OK	negbinomial.size	3.57237e-61	5.46012e-59	RP11-462G2.1	TRUE
MAL2	OK	negbinomial.size	5.84562e-61	8.87661e-59	MAL2	TRUE
DUOXA2	OK	negbinomial.size	7.31952e-61	1.1043e-58	DUOXA2	TRUE
RPL12	OK	negbinomial.size	8.20058e-61	1.2293e-58	RPL12	TRUE
NPC2	OK	negbinomial.size	1.65228e-60	2.46106e-58	NPC2	TRUE
CA2	OK	negbinomial.size	1.93194e-60	2.85939e-58	CA2	TRUE
DBI	OK	negbinomial.size	2.15062e-60	3.16304e-58	DBI	FALSE
KLF10	OK	negbinomial.size	3.51166e-60	5.13251e-58	KLF10	TRUE
ANXA10	OK	negbinomial.size	1.92444e-59	2.79522e-57	ANXA10	TRUE
HSD17B12	OK	negbinomial.size	3.23107e-59	4.66411e-57	HSD17B12	FALSE
HSP90B1	OK	negbinomial.size	6.50673e-59	9.33496e-57	HSP90B1	TRUE
KRT7	OK	negbinomial.size	9.62523e-59	1.37248e-56	KRT7	TRUE
PPP1R1B	OK	negbinomial.size	1.43187e-58	2.02935e-56	PPP1R1B	TRUE
TMBIM6	OK	negbinomial.size	7.77452e-58	1.09522e-55	TMBIM6	FALSE
ANKRD37	OK	negbinomial.size	9.64112e-58	1.35005e-55	ANKRD37	TRUE
IER5	OK	negbinomial.size	9.80352e-58	1.36462e-55	IER5	TRUE
RPL6	OK	negbinomial.size	2.32953e-57	3.22344e-55	RPL6	TRUE
MYL12B	OK	negbinomial.size	2.51742e-57	3.46293e-55	MYL12B	FALSE
C3	OK	negbinomial.size	1.68057e-56	2.29826e-54	C3	TRUE
HLA-DRA	OK	negbinomial.size	2.03222e-56	2.76299e-54	HLA-DRA	TRUE
LAMA3	OK	negbinomial.size	1.46634e-55	1.98211e-53	LAMA3	TRUE
SPRR1B	OK	negbinomial.size	2.08303e-55	2.79952e-53	SPRR1B	FALSE
RPL41	OK	negbinomial.size	2.45226e-55	3.27693e-53	RPL41	TRUE
ANPEP	OK	negbinomial.size	2.88854e-55	3.83798e-53	ANPEP	FALSE
FAM3B	OK	negbinomial.size	3.48886e-55	4.60944e-53	FAM3B	TRUE
KLF6	OK	negbinomial.size	4.01961e-55	5.28081e-53	KLF6	TRUE
MXD1	OK	negbinomial.size	4.89249e-55	6.39167e-53	MXD1	TRUE
DYNLT3	OK	negbinomial.size	6.13023e-55	7.96419e-53	DYNLT3	FALSE
SFN	OK	negbinomial.size	7.03122e-54	9.08426e-52	SFN	TRUE
RAC1	OK	negbinomial.size	8.13651e-54	1.04545e-51	RAC1	FALSE
LYZ	OK	negbinomial.size	1.09665e-53	1.40138e-51	LYZ	TRUE
TNFRSF12A	OK	negbinomial.size	1.21251e-53	1.541e-51	TNFRSF12A	TRUE
DEFB1	OK	negbinomial.size	2.12984e-53	2.69223e-51	DEFB1	TRUE
C15orf48	OK	negbinomial.size	3.01009e-53	3.78446e-51	C15orf48	TRUE
LGALS4	OK	negbinomial.size	4.16576e-53	5.20943e-51	LGALS4	TRUE
S100A13	OK	negbinomial.size	4.25348e-53	5.26397e-51	S100A13	TRUE
RPS6	OK	negbinomial.size	4.25439e-53	5.26397e-51	RPS6	TRUE
KRT16	OK	negbinomial.size	6.24267e-52	7.68341e-50	KRT16	TRUE
ATP6V1G1	OK	negbinomial.size	7.3614e-52	9.01289e-50	ATP6V1G1	FALSE
UPP1	OK	negbinomial.size	1.94431e-51	2.36811e-49	UPP1	TRUE
SPINT2	OK	negbinomial.size	3.51905e-51	4.26388e-49	SPINT2	FALSE
CEACAM6	OK	negbinomial.size	8.1687e-51	9.84665e-49	CEACAM6	TRUE
JUND	OK	negbinomial.size	9.07057e-51	1.08777e-48	JUND	TRUE
ELF3	OK	negbinomial.size	1.39545e-50	1.66493e-48	ELF3	TRUE
RP11-350J20.12	OK	negbinomial.size	2.06129e-50	2.44271e-48	RP11-350J20.12	FALSE
CMPK1	OK	negbinomial.size	2.07273e-50	2.44271e-48	CMPK1	FALSE
PRDX1	OK	negbinomial.size	2.07868e-50	2.44271e-48	PRDX1	FALSE
ANKRD36C	OK	negbinomial.size	4.82369e-50	5.6401e-48	ANKRD36C	TRUE
MT2A	OK	negbinomial.size	5.33853e-50	6.21102e-48	MT2A	TRUE
FBXO32	OK	negbinomial.size	8.75281e-50	1.01329e-47	FBXO32	FALSE
RPL35	OK	negbinomial.size	1.02005e-49	1.17506e-47	RPL35	FALSE
UGCG	OK	negbinomial.size	1.21955e-49	1.398e-47	UGCG	FALSE
CYBA	OK	negbinomial.size	1.23658e-49	1.40896e-47	CYBA	TRUE
RPL14	OK	negbinomial.size	1.24116e-49	1.40896e-47	RPL14	FALSE
SLC38A2	OK	negbinomial.size	1.81167e-49	2.04667e-47	SLC38A2	TRUE
BCAT1	OK	negbinomial.size	2.50255e-49	2.81357e-47	BCAT1	FALSE
MACC1	OK	negbinomial.size	5.89772e-49	6.59895e-47	MACC1	FALSE
AKR7A3	OK	negbinomial.size	7.1526e-49	7.96494e-47	AKR7A3	TRUE
RN7SL1	OK	negbinomial.size	1.72479e-48	1.91157e-46	RN7SL1	TRUE
ALDH1A1	OK	negbinomial.size	5.52446e-48	6.09384e-46	ALDH1A1	TRUE
SLC6A8	OK	negbinomial.size	1.07258e-47	1.17757e-45	SLC6A8	TRUE
TSC22D1	OK	negbinomial.size	3.30985e-47	3.61686e-45	TSC22D1	TRUE
HSPA5	OK	negbinomial.size	3.58351e-47	3.89769e-45	HSPA5	TRUE
DPYSL2	OK	negbinomial.size	8.41922e-47	9.11498e-45	DPYSL2	TRUE
LRRC8A	OK	negbinomial.size	1.59146e-46	1.71503e-44	LRRC8A	TRUE
TIMP2	OK	negbinomial.size	5.75458e-46	6.17297e-44	TIMP2	TRUE
HES1	OK	negbinomial.size	5.93025e-46	6.33237e-44	HES1	TRUE
LY6K	OK	negbinomial.size	6.16675e-46	6.55498e-44	LY6K	FALSE
APOL1	OK	negbinomial.size	9.88151e-46	1.04561e-43	APOL1	TRUE
PLAU	OK	negbinomial.size	1.23045e-45	1.29613e-43	PLAU	FALSE
GDF15	OK	negbinomial.size	1.34443e-45	1.40984e-43	GDF15	TRUE
H1F0	OK	negbinomial.size	2.22122e-45	2.3189e-43	H1F0	TRUE
ONECUT3	OK	negbinomial.size	3.30065e-45	3.43047e-43	ONECUT3	FALSE
SLC4A4	OK	negbinomial.size	6.40278e-45	6.62518e-43	SLC4A4	TRUE
DUSP5	OK	negbinomial.size	9.78839e-45	1.00838e-42	DUSP5	FALSE
TPM3	OK	negbinomial.size	1.0667e-44	1.09407e-42	TPM3	FALSE
EGLN3	OK	negbinomial.size	2.9217e-44	2.98358e-42	EGLN3	TRUE
CLTA	OK	negbinomial.size	3.4807e-44	3.53896e-42	CLTA	FALSE
SCP2	OK	negbinomial.size	5.44427e-44	5.51144e-42	SCP2	FALSE
RP11-1143G9.4	OK	negbinomial.size	7.91064e-44	7.97372e-42	RP11-1143G9.4	TRUE
SUCLG2	OK	negbinomial.size	8.27515e-44	8.30533e-42	SUCLG2	TRUE
ISG20	OK	negbinomial.size	9.10624e-44	9.10041e-42	ISG20	TRUE
HLA-DRB1	OK	negbinomial.size	9.20828e-44	9.16322e-42	HLA-DRB1	TRUE
PRSS8	OK	negbinomial.size	1.64404e-43	1.62906e-41	PRSS8	FALSE
CSTB	OK	negbinomial.size	1.83642e-43	1.81202e-41	CSTB	TRUE
YIPF3	OK	negbinomial.size	2.58761e-43	2.54249e-41	YIPF3	FALSE
YWHAZ	OK	negbinomial.size	2.68418e-43	2.62634e-41	YWHAZ	FALSE
SLC12A2	OK	negbinomial.size	4.18865e-43	4.08132e-41	SLC12A2	TRUE
NCF1	OK	negbinomial.size	4.51659e-43	4.38259e-41	NCF1	TRUE
ZFAND5	OK	negbinomial.size	4.58019e-43	4.42594e-41	ZFAND5	FALSE
SPAG9	OK	negbinomial.size	7.01069e-43	6.7467e-41	SPAG9	FALSE
PFDN2	OK	negbinomial.size	1.09806e-42	1.05238e-40	PFDN2	TRUE
PFDN5	OK	negbinomial.size	3.107e-42	2.9656e-40	PFDN5	FALSE
PHLDA1	OK	negbinomial.size	4.87965e-42	4.63865e-40	PHLDA1	TRUE
SOD1	OK	negbinomial.size	9.76547e-42	9.24557e-40	SOD1	TRUE
RPS3A	OK	negbinomial.size	1.38921e-41	1.30995e-39	RPS3A	FALSE
RNMT	OK	negbinomial.size	1.51786e-41	1.42174e-39	RNMT	FALSE
C19orf83	OK	negbinomial.size	1.51992e-41	1.42174e-39	C19orf83	FALSE
IFITM3	OK	negbinomial.size	1.61292e-41	1.50272e-39	IFITM3	TRUE
RPL36AL	OK	negbinomial.size	2.0681e-41	1.91915e-39	RPL36AL	FALSE
MEIS2	OK	negbinomial.size	2.14547e-41	1.98308e-39	MEIS2	TRUE
ATP1B1	OK	negbinomial.size	4.58531e-41	4.22156e-39	ATP1B1	TRUE
RPL34	OK	negbinomial.size	8.42254e-41	7.72396e-39	RPL34	FALSE
SYT8	OK	negbinomial.size	1.20135e-40	1.09741e-38	SYT8	TRUE
VCAM1	OK	negbinomial.size	1.28066e-40	1.1653e-38	VCAM1	FALSE
VNN1	OK	negbinomial.size	1.57878e-40	1.431e-38	VNN1	TRUE
DSTN	OK	negbinomial.size	1.59129e-40	1.43677e-38	DSTN	FALSE
TCN1	OK	negbinomial.size	1.85133e-40	1.66513e-38	TCN1	TRUE
HSPH1	OK	negbinomial.size	2.51657e-40	2.25479e-38	HSPH1	TRUE
KLK6	OK	negbinomial.size	3.76932e-40	3.36434e-38	KLK6	TRUE
OAZ1	OK	negbinomial.size	5.35801e-40	4.75145e-38	OAZ1	FALSE
CHPT1	OK	negbinomial.size	5.36405e-40	4.75145e-38	CHPT1	TRUE
RPL22	OK	negbinomial.size	8.10766e-40	7.15462e-38	RPL22	FALSE
ALDOA	OK	negbinomial.size	1.09323e-39	9.61093e-38	ALDOA	TRUE
CDV3	OK	negbinomial.size	1.83017e-39	1.60294e-37	CDV3	FALSE
PTGES3	OK	negbinomial.size	2.1574e-39	1.88249e-37	PTGES3	FALSE
MGST2	OK	negbinomial.size	3.28942e-39	2.85959e-37	MGST2	FALSE
NPDC1	OK	negbinomial.size	3.36066e-39	2.91071e-37	NPDC1	FALSE
SEC61B	OK	negbinomial.size	4.65459e-39	4.01651e-37	SEC61B	FALSE
UBB	OK	negbinomial.size	1.20616e-38	1.03698e-36	UBB	TRUE
DDAH1	OK	negbinomial.size	1.3175e-38	1.12856e-36	DDAH1	FALSE
AZGP1	OK	negbinomial.size	1.9622e-38	1.67467e-36	AZGP1	TRUE
LBH	OK	negbinomial.size	2.16908e-38	1.84451e-36	LBH	FALSE
DYNC2H1	OK	negbinomial.size	2.20224e-38	1.86592e-36	DYNC2H1	TRUE
HSPA1B	OK	negbinomial.size	2.83027e-38	2.38938e-36	HSPA1B	TRUE
NR2F2	OK	negbinomial.size	3.03279e-38	2.55114e-36	NR2F2	TRUE
SERPINE1	OK	negbinomial.size	4.54362e-38	3.80833e-36	SERPINE1	FALSE
RALA	OK	negbinomial.size	5.9623e-38	4.97958e-36	RALA	TRUE
WFDC2	OK	negbinomial.size	2.39071e-37	1.98957e-35	WFDC2	TRUE
FSTL3	OK	negbinomial.size	2.58897e-37	2.14691e-35	FSTL3	FALSE
MRPL14	OK	negbinomial.size	3.35346e-37	2.77105e-35	MRPL14	FALSE
EGR4	OK	negbinomial.size	5.32922e-37	4.38816e-35	EGR4	FALSE
LENG8	OK	negbinomial.size	5.5083e-37	4.51971e-35	LENG8	TRUE
ARPC3	OK	negbinomial.size	6.58444e-37	5.38381e-35	ARPC3	FALSE
AKR7A2	OK	negbinomial.size	8.3589e-37	6.8109e-35	AKR7A2	FALSE
EPN1	OK	negbinomial.size	2.04293e-36	1.65882e-34	EPN1	FALSE
QSOX1	OK	negbinomial.size	2.16697e-36	1.75345e-34	QSOX1	FALSE
PMAIP1	OK	negbinomial.size	2.24524e-36	1.81051e-34	PMAIP1	FALSE
ACTG1	OK	negbinomial.size	2.59091e-36	2.08208e-34	ACTG1	TRUE
KIAA1551	OK	negbinomial.size	2.63443e-36	2.1098e-34	KIAA1551	TRUE
FABP3	OK	negbinomial.size	2.8482e-36	2.27321e-34	FABP3	FALSE
RPS8	OK	negbinomial.size	3.87598e-36	3.08298e-34	RPS8	FALSE
RPL18	OK	negbinomial.size	7.37101e-36	5.84309e-34	RPL18	FALSE
ZFAND2A	OK	negbinomial.size	7.61233e-36	6.014e-34	ZFAND2A	FALSE
RPS29	OK	negbinomial.size	8.90117e-36	7.00854e-34	RPS29	TRUE
RPL35A	OK	negbinomial.size	1.08284e-35	8.49741e-34	RPL35A	FALSE
LINC00035	OK	negbinomial.size	1.95098e-35	1.52587e-33	LINC00035	FALSE
IQGAP2	OK	negbinomial.size	4.15149e-35	3.23608e-33	IQGAP2	FALSE
ISG15	OK	negbinomial.size	4.25456e-35	3.30541e-33	ISG15	TRUE
CDA	OK	negbinomial.size	6.76981e-35	5.24212e-33	CDA	FALSE
MIF	OK	negbinomial.size	7.17726e-35	5.53928e-33	MIF	TRUE
EFNA1	OK	negbinomial.size	8.27039e-35	6.36194e-33	EFNA1	FALSE
TCEB2	OK	negbinomial.size	9.5293e-35	7.30632e-33	TCEB2	FALSE
HLA-C	OK	negbinomial.size	1.03757e-34	7.92926e-33	HLA-C	TRUE
TUBA1B	OK	negbinomial.size	2.7776e-34	2.11577e-32	TUBA1B	TRUE
S100A4	OK	negbinomial.size	3.11588e-34	2.36574e-32	S100A4	TRUE
ARL14	OK	negbinomial.size	3.85405e-34	2.91673e-32	ARL14	TRUE
SDR16C5	OK	negbinomial.size	4.82483e-34	3.63963e-32	SDR16C5	FALSE
RBM8A	OK	negbinomial.size	6.27006e-34	4.71464e-32	RBM8A	FALSE
BHLHE40	OK	negbinomial.size	6.91487e-34	5.18283e-32	BHLHE40	FALSE
MT1X	OK	negbinomial.size	8.54454e-34	6.38384e-32	MT1X	TRUE
PARD6B	OK	negbinomial.size	1.02262e-33	7.61589e-32	PARD6B	FALSE
BZW1	OK	negbinomial.size	1.07781e-33	8.00149e-32	BZW1	FALSE
RBP1	OK	negbinomial.size	1.14019e-33	8.43779e-32	RBP1	TRUE
F11R	OK	negbinomial.size	1.42591e-33	1.05189e-31	F11R	FALSE
H3F3B	OK	negbinomial.size	1.84278e-33	1.35514e-31	H3F3B	TRUE
RPL28	OK	negbinomial.size	2.46106e-33	1.80414e-31	RPL28	FALSE
MARCKSL1	OK	negbinomial.size	4.21438e-33	3.07979e-31	MARCKSL1	FALSE
CMBL	OK	negbinomial.size	4.36762e-33	3.18183e-31	CMBL	TRUE
DEGS2	OK	negbinomial.size	5.80449e-33	4.21546e-31	DEGS2	FALSE
DYNLL1	OK	negbinomial.size	6.93864e-33	5.02353e-31	DYNLL1	FALSE
NEAT1	OK	negbinomial.size	1.87555e-32	1.35369e-30	NEAT1	TRUE
FNDC3B	OK	negbinomial.size	2.45968e-32	1.76983e-30	FNDC3B	FALSE
RMND5A	OK	negbinomial.size	6.11233e-32	4.38457e-30	RMND5A	FALSE
UBE2B	OK	negbinomial.size	7.07472e-32	5.0594e-30	UBE2B	FALSE
RHEB	OK	negbinomial.size	7.78897e-32	5.55321e-30	RHEB	FALSE
XIST	OK	negbinomial.size	7.88001e-32	5.60104e-30	XIST	TRUE
DSG2	OK	negbinomial.size	9.20006e-32	6.5195e-30	DSG2	FALSE
KLF4	OK	negbinomial.size	1.11704e-31	7.8918e-30	KLF4	FALSE
MUC4	OK	negbinomial.size	1.13944e-31	8.02582e-30	MUC4	FALSE
CTNNB1	OK	negbinomial.size	1.33914e-31	9.40412e-30	CTNNB1	FALSE
RPS15	OK	negbinomial.size	1.41185e-31	9.88509e-30	RPS15	TRUE
ATP6V0E1	OK	negbinomial.size	2.0377e-31	1.42244e-29	ATP6V0E1	FALSE
PAEP	OK	negbinomial.size	2.84721e-31	1.98161e-29	PAEP	FALSE
NPNT	OK	negbinomial.size	3.63523e-31	2.52255e-29	NPNT	FALSE
ITM2B	OK	negbinomial.size	5.49136e-31	3.79927e-29	ITM2B	FALSE
MINOS1	OK	negbinomial.size	5.97981e-31	4.12501e-29	MINOS1	FALSE
RPS27	OK	negbinomial.size	6.88847e-31	4.73785e-29	RPS27	TRUE
TMEM54	OK	negbinomial.size	1.03782e-30	7.11712e-29	TMEM54	FALSE
VDAC2	OK	negbinomial.size	1.34346e-30	9.18622e-29	VDAC2	FALSE
RPL11	OK	negbinomial.size	1.4683e-30	1.00105e-28	RPL11	FALSE
SLC20A1	OK	negbinomial.size	1.48619e-30	1.01031e-28	SLC20A1	TRUE
SEL1L3	OK	negbinomial.size	1.49751e-30	1.01505e-28	SEL1L3	FALSE
FCGRT	OK	negbinomial.size	1.62564e-30	1.09871e-28	FCGRT	FALSE
S100A7	OK	negbinomial.size	1.66135e-30	1.11962e-28	S100A7	FALSE
TGM2	OK	negbinomial.size	1.81077e-30	1.21681e-28	TGM2	TRUE
TGFBI	OK	negbinomial.size	3.29394e-30	2.20713e-28	TGFBI	FALSE
PPP3CA	OK	negbinomial.size	4.2782e-30	2.85845e-28	PPP3CA	FALSE
KATNBL1	OK	negbinomial.size	8.04443e-30	5.35952e-28	KATNBL1	TRUE
HMGA1	OK	negbinomial.size	8.81001e-30	5.8529e-28	HMGA1	TRUE
SDC4	OK	negbinomial.size	9.42787e-30	6.24563e-28	SDC4	TRUE
CHMP1B	OK	negbinomial.size	9.64664e-30	6.3725e-28	CHMP1B	FALSE
CTSL	OK	negbinomial.size	1.04977e-29	6.9152e-28	CTSL	FALSE
UBE2H	OK	negbinomial.size	1.87066e-29	1.2288e-27	UBE2H	FALSE
KCNQ1	OK	negbinomial.size	2.7919e-29	1.82881e-27	KCNQ1	FALSE
BROX	OK	negbinomial.size	2.84429e-29	1.85793e-27	BROX	FALSE
GABRP	OK	negbinomial.size	3.69612e-29	2.40762e-27	GABRP	TRUE
YBX1	OK	negbinomial.size	4.01915e-29	2.61077e-27	YBX1	FALSE
TFF3	OK	negbinomial.size	4.07806e-29	2.6417e-27	TFF3	TRUE
RPSAP58	OK	negbinomial.size	4.77102e-29	3.08206e-27	RPSAP58	FALSE
FAT1	OK	negbinomial.size	5.02506e-29	3.23722e-27	FAT1	FALSE
EML4	OK	negbinomial.size	6.42862e-29	4.13003e-27	EML4	FALSE
SLC19A3	OK	negbinomial.size	7.03323e-29	4.50608e-27	SLC19A3	FALSE
PVRL3	OK	negbinomial.size	9.0222e-29	5.7646e-27	PVRL3	FALSE
LGALS1	OK	negbinomial.size	1.16983e-28	7.4541e-27	LGALS1	FALSE
C14orf105	OK	negbinomial.size	1.32225e-28	8.40241e-27	C14orf105	FALSE
CLDN7	OK	negbinomial.size	1.48668e-28	9.42169e-27	CLDN7	FALSE
SLC22A18	OK	negbinomial.size	1.62047e-28	1.02418e-26	SLC22A18	FALSE
PHLDA3	OK	negbinomial.size	1.76808e-28	1.11446e-26	PHLDA3	TRUE
PBLD	OK	negbinomial.size	1.82011e-28	1.14377e-26	PBLD	FALSE
CFTR	OK	negbinomial.size	1.82435e-28	1.14377e-26	CFTR	FALSE
ABHD2	OK	negbinomial.size	2.015e-28	1.25991e-26	ABHD2	FALSE
ABHD14B	OK	negbinomial.size	2.39199e-28	1.49165e-26	ABHD14B	FALSE
KCNK1	OK	negbinomial.size	3.09614e-28	1.92562e-26	KCNK1	FALSE
SCTR	OK	negbinomial.size	3.29423e-28	2.04338e-26	SCTR	FALSE
CALM1	OK	negbinomial.size	4.23796e-28	2.62182e-26	CALM1	FALSE
BTG1	OK	negbinomial.size	4.56835e-28	2.81875e-26	BTG1	TRUE
ADRA2A	OK	negbinomial.size	6.65648e-28	4.09636e-26	ADRA2A	FALSE
C6orf222	OK	negbinomial.size	7.81353e-28	4.79579e-26	C6orf222	FALSE
LIPH	OK	negbinomial.size	8.24152e-28	5.04523e-26	LIPH	FALSE
RHOB	OK	negbinomial.size	9.07001e-28	5.53792e-26	RHOB	TRUE
BRSK1	OK	negbinomial.size	9.82724e-28	5.98463e-26	BRSK1	FALSE
RP11-465B22.8	OK	negbinomial.size	1.62469e-27	9.86842e-26	RP11-465B22.8	FALSE
AMIGO2	OK	negbinomial.size	2.86496e-27	1.73568e-25	AMIGO2	FALSE
PTPRF	OK	negbinomial.size	3.49561e-27	2.11227e-25	PTPRF	FALSE
GMDS	OK	negbinomial.size	5.19022e-27	3.12818e-25	GMDS	FALSE
C10orf10	OK	negbinomial.size	5.79612e-27	3.48438e-25	C10orf10	TRUE
CWC25	OK	negbinomial.size	6.46731e-27	3.8779e-25	CWC25	FALSE
MUC17	OK	negbinomial.size	7.17649e-27	4.29213e-25	MUC17	FALSE
IFI27L2	OK	negbinomial.size	1.50486e-26	8.97734e-25	IFI27L2	TRUE
TKT	OK	negbinomial.size	1.65991e-26	9.87712e-25	TKT	TRUE
ATP5E	OK	negbinomial.size	1.89108e-26	1.12241e-24	ATP5E	FALSE
TPM1	OK	negbinomial.size	2.03188e-26	1.20293e-24	TPM1	TRUE
SQSTM1	OK	negbinomial.size	2.38118e-26	1.40616e-24	SQSTM1	TRUE
SELK	OK	negbinomial.size	3.1069e-26	1.8301e-24	SELK	TRUE
CDCA7	OK	negbinomial.size	5.37572e-26	3.15857e-24	CDCA7	FALSE
LENG9	OK	negbinomial.size	6.95907e-26	4.07864e-24	LENG9	FALSE
GCNT3	OK	negbinomial.size	7.61326e-26	4.4509e-24	GCNT3	TRUE
MYO1F	OK	negbinomial.size	8.31584e-26	4.84953e-24	MYO1F	FALSE
PSAP	OK	negbinomial.size	1.18685e-25	6.90408e-24	PSAP	FALSE
PDZK1IP1	OK	negbinomial.size	1.51533e-25	8.79307e-24	PDZK1IP1	TRUE
RND1	OK	negbinomial.size	1.63098e-25	9.44071e-24	RND1	FALSE
TUFT1	OK	negbinomial.size	3.12415e-25	1.80391e-23	TUFT1	FALSE
BNIP3L	OK	negbinomial.size	3.2538e-25	1.8741e-23	BNIP3L	FALSE
RPS20	OK	negbinomial.size	3.26174e-25	1.8741e-23	RPS20	FALSE
TMBIM1	OK	negbinomial.size	3.5028e-25	2.00767e-23	TMBIM1	FALSE
CAT	OK	negbinomial.size	3.7979e-25	2.17149e-23	CAT	FALSE
IFITM1	OK	negbinomial.size	5.63054e-25	3.21147e-23	IFITM1	FALSE
RNF128	OK	negbinomial.size	6.26559e-25	3.56498e-23	RNF128	FALSE
ATP5G1	OK	negbinomial.size	6.854e-25	3.89031e-23	ATP5G1	FALSE
CRABP2	OK	negbinomial.size	7.16068e-25	4.05454e-23	CRABP2	TRUE
ZG16B	OK	negbinomial.size	7.65202e-25	4.32228e-23	ZG16B	TRUE
GNAI2	OK	negbinomial.size	7.78615e-25	4.38745e-23	GNAI2	FALSE
HBA1	OK	negbinomial.size	8.38231e-25	4.70417e-23	HBA1	FALSE
LASP1	OK	negbinomial.size	8.38845e-25	4.70417e-23	LASP1	FALSE
RPLP0	OK	negbinomial.size	1.0065e-24	5.63086e-23	RPLP0	FALSE
SBDS	OK	negbinomial.size	1.01644e-24	5.6729e-23	SBDS	FALSE
SPRR2A	OK	negbinomial.size	1.44381e-24	8.03893e-23	SPRR2A	FALSE
DCBLD2	OK	negbinomial.size	1.70314e-24	9.46029e-23	DCBLD2	TRUE
FAM3C	OK	negbinomial.size	1.79343e-24	9.93821e-23	FAM3C	FALSE
BLVRB	OK	negbinomial.size	1.96929e-24	1.0887e-22	BLVRB	FALSE
DDX24	OK	negbinomial.size	2.03397e-24	1.1218e-22	DDX24	FALSE
POU2F3	OK	negbinomial.size	2.11137e-24	1.16175e-22	POU2F3	FALSE
SNX7	OK	negbinomial.size	2.41474e-24	1.32556e-22	SNX7	FALSE
TNFSF10	OK	negbinomial.size	2.96838e-24	1.62566e-22	TNFSF10	TRUE
LYPD2	OK	negbinomial.size	3.5088e-24	1.91713e-22	LYPD2	TRUE
ZBTB43	OK	negbinomial.size	4.40856e-24	2.40313e-22	ZBTB43	FALSE
FGFR3	OK	negbinomial.size	5.87083e-24	3.19278e-22	FGFR3	FALSE
RBM3	OK	negbinomial.size	7.01498e-24	3.80616e-22	RBM3	FALSE
FAM3D	OK	negbinomial.size	7.3841e-24	3.99716e-22	FAM3D	TRUE
MFI2	OK	negbinomial.size	9.07082e-24	4.89887e-22	MFI2	FALSE
NFIA	OK	negbinomial.size	9.88863e-24	5.32824e-22	NFIA	FALSE
DNAJB6	OK	negbinomial.size	1.13864e-23	6.12118e-22	DNAJB6	FALSE
AQP5	OK	negbinomial.size	1.26538e-23	6.78693e-22	AQP5	FALSE
PLEKHA5	OK	negbinomial.size	1.96332e-23	1.05062e-21	PLEKHA5	TRUE
CEACAM1	OK	negbinomial.size	2.05683e-23	1.09815e-21	CEACAM1	FALSE
ATP5I	OK	negbinomial.size	2.18999e-23	1.16658e-21	ATP5I	FALSE
IMPDH2	OK	negbinomial.size	2.83733e-23	1.50797e-21	IMPDH2	FALSE
ARRDC4	OK	negbinomial.size	3.10187e-23	1.64484e-21	ARRDC4	FALSE
RAP2B	OK	negbinomial.size	3.23625e-23	1.71221e-21	RAP2B	FALSE
HNMT	OK	negbinomial.size	3.82619e-23	2.01976e-21	HNMT	FALSE
CCDC47	OK	negbinomial.size	3.87795e-23	2.04247e-21	CCDC47	FALSE
GSTK1	OK	negbinomial.size	4.50947e-23	2.36975e-21	GSTK1	FALSE
PROM1	OK	negbinomial.size	5.18864e-23	2.72055e-21	PROM1	FALSE
RASEF	OK	negbinomial.size	5.41268e-23	2.83167e-21	RASEF	FALSE
PARK7	OK	negbinomial.size	5.62207e-23	2.93464e-21	PARK7	FALSE
NDUFV2	OK	negbinomial.size	5.71642e-23	2.97725e-21	NDUFV2	FALSE
S100A14	OK	negbinomial.size	6.01963e-23	3.1282e-21	S100A14	TRUE
UQCRC2	OK	negbinomial.size	6.13251e-23	3.17979e-21	UQCRC2	FALSE
CLDN23	OK	negbinomial.size	6.77774e-23	3.50658e-21	CLDN23	FALSE
VCL	OK	negbinomial.size	6.98451e-23	3.60558e-21	VCL	FALSE
TMEM159	OK	negbinomial.size	9.01711e-23	4.64461e-21	TMEM159	FALSE
TC2N	OK	negbinomial.size	9.09263e-23	4.67321e-21	TC2N	FALSE
PKDCC	OK	negbinomial.size	9.66218e-23	4.951e-21	PKDCC	FALSE
RPL21	OK	negbinomial.size	9.67546e-23	4.951e-21	RPL21	FALSE
HES4	OK	negbinomial.size	1.09595e-22	5.5958e-21	HES4	TRUE
CHCHD2	OK	negbinomial.size	1.15057e-22	5.86189e-21	CHCHD2	FALSE
METRN	OK	negbinomial.size	1.29765e-22	6.59688e-21	METRN	FALSE
NRP2	OK	negbinomial.size	1.37454e-22	6.97258e-21	NRP2	FALSE
ANKRD12	OK	negbinomial.size	1.56343e-22	7.91359e-21	ANKRD12	FALSE
HIBCH	OK	negbinomial.size	1.60945e-22	8.12895e-21	HIBCH	FALSE
TNFRSF11B	OK	negbinomial.size	1.63625e-22	8.2465e-21	TNFRSF11B	FALSE
HIF1A-AS2	OK	negbinomial.size	1.66986e-22	8.3978e-21	HIF1A-AS2	FALSE
LPAR6	OK	negbinomial.size	1.81782e-22	9.12228e-21	LPAR6	FALSE
PHGR1	OK	negbinomial.size	2.0997e-22	1.05142e-20	PHGR1	TRUE
MGAT4B	OK	negbinomial.size	2.81663e-22	1.40741e-20	MGAT4B	FALSE
EIF4A2	OK	negbinomial.size	2.84671e-22	1.41941e-20	EIF4A2	FALSE
RSRC2	OK	negbinomial.size	2.85674e-22	1.42138e-20	RSRC2	TRUE
DSP	OK	negbinomial.size	2.89683e-22	1.43827e-20	DSP	FALSE
PRSS3	OK	negbinomial.size	3.12159e-22	1.54658e-20	PRSS3	TRUE
KTN1	OK	negbinomial.size	3.13987e-22	1.55234e-20	KTN1	FALSE
MANSC1	OK	negbinomial.size	3.59547e-22	1.77384e-20	MANSC1	FALSE
PRSS22	OK	negbinomial.size	3.63484e-22	1.78949e-20	PRSS22	FALSE
C12orf44	OK	negbinomial.size	3.69154e-22	1.81359e-20	C12orf44	FALSE
YWHAG	OK	negbinomial.size	3.97521e-22	1.94885e-20	YWHAG	FALSE
AHNAK2	OK	negbinomial.size	4.16798e-22	2.03908e-20	AHNAK2	TRUE
PKP4	OK	negbinomial.size	5.29233e-22	2.58374e-20	PKP4	FALSE
SERPINE2	OK	negbinomial.size	6.22787e-22	3.03414e-20	SERPINE2	FALSE
CYBRD1	OK	negbinomial.size	7.13661e-22	3.46964e-20	CYBRD1	FALSE
RRAD	OK	negbinomial.size	7.59545e-22	3.68506e-20	RRAD	FALSE
PPP2R1A	OK	negbinomial.size	9.20188e-22	4.4552e-20	PPP2R1A	FALSE
RABAC1	OK	negbinomial.size	9.56779e-22	4.62279e-20	RABAC1	FALSE
CAV1	OK	negbinomial.size	9.8763e-22	4.762e-20	CAV1	TRUE
PTGER2	OK	negbinomial.size	1.09604e-21	5.27385e-20	PTGER2	FALSE
APLP2	OK	negbinomial.size	1.1402e-21	5.47506e-20	APLP2	TRUE
CTSD	OK	negbinomial.size	1.15796e-21	5.54896e-20	CTSD	TRUE
MLTK	OK	negbinomial.size	1.39135e-21	6.65371e-20	MLTK	FALSE
PIK3IP1	OK	negbinomial.size	1.51871e-21	7.24796e-20	PIK3IP1	FALSE
S100A16	OK	negbinomial.size	1.66155e-21	7.91352e-20	S100A16	TRUE
HK2	OK	negbinomial.size	1.66999e-21	7.93755e-20	HK2	FALSE
FGFR4	OK	negbinomial.size	2.03214e-21	9.63927e-20	FGFR4	FALSE
LGALS3BP	OK	negbinomial.size	2.1283e-21	1.0075e-19	LGALS3BP	FALSE
FGD6	OK	negbinomial.size	2.24607e-21	1.0611e-19	FGD6	FALSE
UBL5	OK	negbinomial.size	2.42512e-21	1.14338e-19	UBL5	FALSE
ACE2	OK	negbinomial.size	2.91457e-21	1.37137e-19	ACE2	FALSE
KLK10	OK	negbinomial.size	3.12283e-21	1.46641e-19	KLK10	TRUE
BDH2	OK	negbinomial.size	3.52403e-21	1.65149e-19	BDH2	FALSE
RPS4Y1	OK	negbinomial.size	3.5999e-21	1.68367e-19	RPS4Y1	TRUE
LYNX1	OK	negbinomial.size	3.63103e-21	1.69484e-19	LYNX1	FALSE
CTA-29F11.1	OK	negbinomial.size	3.82694e-21	1.78273e-19	CTA-29F11.1	FALSE
RPS13	OK	negbinomial.size	3.87784e-21	1.80285e-19	RPS13	FALSE
UBE2D1	OK	negbinomial.size	4.07223e-21	1.88947e-19	UBE2D1	FALSE
TUBA4A	OK	negbinomial.size	4.08456e-21	1.89143e-19	TUBA4A	FALSE
AMN	OK	negbinomial.size	4.75477e-21	2.19744e-19	AMN	FALSE
PLEKHS1	OK	negbinomial.size	5.57716e-21	2.57243e-19	PLEKHS1	FALSE
LINC00973	OK	negbinomial.size	5.83552e-21	2.68629e-19	LINC00973	FALSE
MT-ND4L	OK	negbinomial.size	5.91816e-21	2.71898e-19	MT-ND4L	TRUE
DUT	OK	negbinomial.size	5.98347e-21	2.7436e-19	DUT	TRUE
C1orf86	OK	negbinomial.size	6.61842e-21	3.0288e-19	C1orf86	FALSE
APOBEC3B	OK	negbinomial.size	7.76131e-21	3.54489e-19	APOBEC3B	FALSE
RPS2	OK	negbinomial.size	9.41181e-21	4.29035e-19	RPS2	FALSE
WNT7A	OK	negbinomial.size	9.6138e-21	4.37391e-19	WNT7A	FALSE
MAFK	OK	negbinomial.size	1.07031e-20	4.86005e-19	MAFK	FALSE
KDM3A	OK	negbinomial.size	1.31731e-20	5.97001e-19	KDM3A	FALSE
COX7B	OK	negbinomial.size	1.35045e-20	6.10835e-19	COX7B	TRUE
MRPL23	OK	negbinomial.size	1.3897e-20	6.27375e-19	MRPL23	TRUE
CAPN2	OK	negbinomial.size	1.49102e-20	6.71245e-19	CAPN2	FALSE
CD164	OK	negbinomial.size	1.49261e-20	6.71245e-19	CD164	FALSE
SYT13	OK	negbinomial.size	1.53671e-20	6.89748e-19	SYT13	FALSE
BMP4	OK	negbinomial.size	1.55711e-20	6.97568e-19	BMP4	FALSE
PERP	OK	negbinomial.size	1.60723e-20	7.18646e-19	PERP	FALSE
TAF10	OK	negbinomial.size	1.62693e-20	7.26062e-19	TAF10	FALSE
SEC62	OK	negbinomial.size	1.63649e-20	7.2894e-19	SEC62	FALSE
ANGPTL4	OK	negbinomial.size	1.96123e-20	8.71927e-19	ANGPTL4	FALSE
SERINC2	OK	negbinomial.size	2.3422e-20	1.03933e-18	SERINC2	FALSE
PTOV1	OK	negbinomial.size	2.35306e-20	1.04216e-18	PTOV1	FALSE
ATP5F1	OK	negbinomial.size	3.08903e-20	1.36554e-18	ATP5F1	FALSE
MAP3K13	OK	negbinomial.size	3.33424e-20	1.47116e-18	MAP3K13	FALSE
ARRDC3	OK	negbinomial.size	3.35431e-20	1.47722e-18	ARRDC3	FALSE
NLRP2	OK	negbinomial.size	3.36188e-20	1.47777e-18	NLRP2	FALSE
GTPBP2	OK	negbinomial.size	3.41227e-20	1.49711e-18	GTPBP2	FALSE
VDAC1	OK	negbinomial.size	3.57031e-20	1.56352e-18	VDAC1	FALSE
ITGA2	OK	negbinomial.size	3.64023e-20	1.59115e-18	ITGA2	TRUE
KRTCAP3	OK	negbinomial.size	4.22768e-20	1.84448e-18	KRTCAP3	FALSE
CELF2	OK	negbinomial.size	4.54839e-20	1.98071e-18	CELF2	FALSE
TNFAIP2	OK	negbinomial.size	4.8917e-20	2.12625e-18	TNFAIP2	TRUE
2024-09-15	OK	negbinomial.size	5.10719e-20	2.2158e-18	2024-09-15	FALSE
AKR1B10	OK	negbinomial.size	6.25433e-20	2.70847e-18	AKR1B10	FALSE
SRCAP	OK	negbinomial.size	6.44229e-20	2.78471e-18	SRCAP	TRUE
TMPRSS2	OK	negbinomial.size	6.71829e-20	2.89866e-18	TMPRSS2	FALSE
TGFBR2	OK	negbinomial.size	6.76159e-20	2.91196e-18	TGFBR2	FALSE
ACBD3	OK	negbinomial.size	6.77545e-20	2.91257e-18	ACBD3	FALSE
HLA-DMA	OK	negbinomial.size	6.94319e-20	2.9792e-18	HLA-DMA	FALSE
CDC5L	OK	negbinomial.size	7.0647e-20	3.02579e-18	CDC5L	FALSE
TPSAB1	OK	negbinomial.size	7.09368e-20	3.03264e-18	TPSAB1	FALSE
CKS2	OK	negbinomial.size	7.17282e-20	3.06088e-18	CKS2	TRUE
FAM211A	OK	negbinomial.size	8.66152e-20	3.68943e-18	FAM211A	TRUE
DOK5	OK	negbinomial.size	9.1582e-20	3.8939e-18	DOK5	FALSE
FAM102A	OK	negbinomial.size	1.04432e-19	4.4322e-18	FAM102A	FALSE
IGLL5	OK	negbinomial.size	1.0564e-19	4.47533e-18	IGLL5	FALSE
RPL23A	OK	negbinomial.size	1.21658e-19	5.14459e-18	RPL23A	FALSE
CNTNAP2	OK	negbinomial.size	1.26653e-19	5.34616e-18	CNTNAP2	FALSE
HLA-DQB1	OK	negbinomial.size	1.30228e-19	5.48716e-18	HLA-DQB1	FALSE
POLR2L	OK	negbinomial.size	1.45029e-19	6.0998e-18	POLR2L	TRUE
C12orf49	OK	negbinomial.size	1.49025e-19	6.25662e-18	C12orf49	FALSE
TP53INP2	OK	negbinomial.size	1.53113e-19	6.41674e-18	TP53INP2	FALSE
FAM46A	OK	negbinomial.size	1.66348e-19	6.95894e-18	FAM46A	FALSE
RPL39	OK	negbinomial.size	1.68599e-19	7.04051e-18	RPL39	FALSE
PSMA7	OK	negbinomial.size	1.77271e-19	7.38946e-18	PSMA7	FALSE
LSR	OK	negbinomial.size	1.82164e-19	7.57992e-18	LSR	FALSE
MT1E	OK	negbinomial.size	1.94426e-19	8.07294e-18	MT1E	TRUE
IDH1	OK	negbinomial.size	1.94703e-19	8.07294e-18	IDH1	FALSE
MDH1	OK	negbinomial.size	1.95755e-19	8.10219e-18	MDH1	FALSE
TIPARP	OK	negbinomial.size	2.08029e-19	8.59499e-18	TIPARP	FALSE
STARD10	OK	negbinomial.size	2.36737e-19	9.76384e-18	STARD10	FALSE
IFI6	OK	negbinomial.size	3.00043e-19	1.2353e-17	IFI6	TRUE
PTPRC	OK	negbinomial.size	3.80203e-19	1.56204e-17	PTPRC	FALSE
TAX1BP1	OK	negbinomial.size	3.80741e-19	1.56204e-17	TAX1BP1	FALSE
FAM213B	OK	negbinomial.size	3.81823e-19	1.56373e-17	FAM213B	FALSE
DEDD2	OK	negbinomial.size	4.32614e-19	1.76865e-17	DEDD2	FALSE
KRT19	OK	negbinomial.size	4.79733e-19	1.95786e-17	KRT19	TRUE
PIK3AP1	OK	negbinomial.size	4.82987e-19	1.96771e-17	PIK3AP1	FALSE
CTNNAL1	OK	negbinomial.size	5.49587e-19	2.23515e-17	CTNNAL1	FALSE
PABPC1	OK	negbinomial.size	5.70645e-19	2.31676e-17	PABPC1	FALSE
GPT	OK	negbinomial.size	6.00827e-19	2.43507e-17	GPT	FALSE
RPL5	OK	negbinomial.size	6.21713e-19	2.51535e-17	RPL5	FALSE
PKM	OK	negbinomial.size	6.28212e-19	2.53726e-17	PKM	TRUE
TUBA1C	OK	negbinomial.size	6.95383e-19	2.80371e-17	TUBA1C	FALSE
OPTN	OK	negbinomial.size	7.0902e-19	2.85377e-17	OPTN	FALSE
UQCRC1	OK	negbinomial.size	7.95028e-19	3.19446e-17	UQCRC1	FALSE
IL8	OK	negbinomial.size	8.54559e-19	3.42776e-17	IL8	TRUE
MTRNR2L8	OK	negbinomial.size	8.58447e-19	3.43746e-17	MTRNR2L8	TRUE
NDUFV1	OK	negbinomial.size	9.67484e-19	3.86746e-17	NDUFV1	FALSE
S100A6	OK	negbinomial.size	9.90656e-19	3.95332e-17	S100A6	TRUE
CPEB4	OK	negbinomial.size	1.14945e-18	4.57919e-17	CPEB4	FALSE
TMC4	OK	negbinomial.size	1.23587e-18	4.91509e-17	TMC4	FALSE
C1orf51	OK	negbinomial.size	1.27631e-18	5.06731e-17	C1orf51	FALSE
KLK7	OK	negbinomial.size	1.39912e-18	5.54551e-17	KLK7	TRUE
TNFRSF14	OK	negbinomial.size	1.40262e-18	5.54997e-17	TNFRSF14	FALSE
FUCA1	OK	negbinomial.size	1.41678e-18	5.59651e-17	FUCA1	FALSE
PECR	OK	negbinomial.size	1.48466e-18	5.85476e-17	PECR	FALSE
ANP32B	OK	negbinomial.size	1.48968e-18	5.86468e-17	ANP32B	FALSE
TESC	OK	negbinomial.size	1.57767e-18	6.20065e-17	TESC	TRUE
CCNL1	OK	negbinomial.size	1.60634e-18	6.30273e-17	CCNL1	TRUE
CRCT1	OK	negbinomial.size	1.64135e-18	6.42931e-17	CRCT1	FALSE
TCEB1	OK	negbinomial.size	1.83937e-18	7.19293e-17	TCEB1	FALSE
PTPRZ1	OK	negbinomial.size	2.1246e-18	8.29447e-17	PTPRZ1	FALSE
TOMM20	OK	negbinomial.size	2.15983e-18	8.41796e-17	TOMM20	FALSE
EPS8L1	OK	negbinomial.size	2.194e-18	8.53687e-17	EPS8L1	FALSE
CPT1A	OK	negbinomial.size	2.20823e-18	8.57798e-17	CPT1A	FALSE
TCEA3	OK	negbinomial.size	2.23962e-18	8.68548e-17	TCEA3	FALSE
PYGB	OK	negbinomial.size	2.34874e-18	9.09358e-17	PYGB	FALSE
MRPL2	OK	negbinomial.size	2.86445e-18	1.10719e-16	MRPL2	FALSE
FAM208A	OK	negbinomial.size	2.9247e-18	1.12862e-16	FAM208A	FALSE
NPC1	OK	negbinomial.size	2.98731e-18	1.15088e-16	NPC1	FALSE
KLHL24	OK	negbinomial.size	3.76819e-18	1.44933e-16	KLHL24	FALSE
ABCC3	OK	negbinomial.size	3.87465e-18	1.48783e-16	ABCC3	TRUE
SERTAD1	OK	negbinomial.size	4.14532e-18	1.58915e-16	SERTAD1	FALSE
COTL1	OK	negbinomial.size	4.3951e-18	1.68215e-16	COTL1	FALSE
NQO1	OK	negbinomial.size	4.96084e-18	1.89558e-16	NQO1	FALSE
GOLGB1	OK	negbinomial.size	6.35072e-18	2.4227e-16	GOLGB1	FALSE
COL18A1	OK	negbinomial.size	6.46429e-18	2.46201e-16	COL18A1	FALSE
SFPQ	OK	negbinomial.size	6.51324e-18	2.47662e-16	SFPQ	TRUE
EEF1A2	OK	negbinomial.size	7.23141e-18	2.74524e-16	EEF1A2	FALSE
SLC39A14	OK	negbinomial.size	7.3227e-18	2.77539e-16	SLC39A14	FALSE
TOR1AIP2	OK	negbinomial.size	7.6791e-18	2.90576e-16	TOR1AIP2	FALSE
RPLP2	OK	negbinomial.size	7.92567e-18	2.99421e-16	RPLP2	FALSE
MVP	OK	negbinomial.size	8.32781e-18	3.14106e-16	MVP	FALSE
TTC37	OK	negbinomial.size	8.45263e-18	3.18301e-16	TTC37	FALSE
TSPYL2	OK	negbinomial.size	8.56175e-18	3.21891e-16	TSPYL2	FALSE
NHP2L1	OK	negbinomial.size	1.00807e-17	3.78392e-16	NHP2L1	FALSE
CTD-2314B22.3	OK	negbinomial.size	1.05282e-17	3.94554e-16	CTD-2314B22.3	FALSE
SSU72	OK	negbinomial.size	1.12509e-17	4.20965e-16	SSU72	FALSE
LST1	OK	negbinomial.size	1.15902e-17	4.32967e-16	LST1	FALSE
CLDND1	OK	negbinomial.size	1.16531e-17	4.34623e-16	CLDND1	FALSE
ANXA13	OK	negbinomial.size	1.17218e-17	4.36487e-16	ANXA13	FALSE
ADH6	OK	negbinomial.size	1.22489e-17	4.55389e-16	ADH6	FALSE
NME3	OK	negbinomial.size	1.26307e-17	4.68838e-16	NME3	FALSE
KRT14	OK	negbinomial.size	1.29991e-17	4.81749e-16	KRT14	FALSE
PLAT	OK	negbinomial.size	1.3309e-17	4.92455e-16	PLAT	TRUE
PVRL4	OK	negbinomial.size	1.62622e-17	6.00777e-16	PVRL4	FALSE
EDN1	OK	negbinomial.size	1.65341e-17	6.09859e-16	EDN1	FALSE
RHOC	OK	negbinomial.size	1.68879e-17	6.21929e-16	RHOC	FALSE
MGST1	OK	negbinomial.size	1.69941e-17	6.24853e-16	MGST1	TRUE
IRF6	OK	negbinomial.size	1.70933e-17	6.27514e-16	IRF6	FALSE
C11orf54	OK	negbinomial.size	1.76178e-17	6.45755e-16	C11orf54	FALSE
TXNRD1	OK	negbinomial.size	2.02812e-17	7.42215e-16	TXNRD1	FALSE
NRARP	OK	negbinomial.size	2.24086e-17	8.18788e-16	NRARP	FALSE
LRIG1	OK	negbinomial.size	2.38598e-17	8.70455e-16	LRIG1	FALSE
VSIG2	OK	negbinomial.size	2.55427e-17	9.30401e-16	VSIG2	FALSE
CKLF	OK	negbinomial.size	3.15084e-17	1.14592e-15	CKLF	TRUE
PRKAR2A	OK	negbinomial.size	3.36387e-17	1.22149e-15	PRKAR2A	FALSE
PHLDA2	OK	negbinomial.size	3.42287e-17	1.24099e-15	PHLDA2	TRUE
TMEM37	OK	negbinomial.size	3.56518e-17	1.29058e-15	TMEM37	FALSE
C1orf63	OK	negbinomial.size	3.77553e-17	1.36462e-15	C1orf63	TRUE
CALM2	OK	negbinomial.size	4.01881e-17	1.45031e-15	CALM2	FALSE
NR1D1	OK	negbinomial.size	4.25608e-17	1.53357e-15	NR1D1	FALSE
PPP1R16A	OK	negbinomial.size	4.63963e-17	1.6692e-15	PPP1R16A	FALSE
DUSP10	OK	negbinomial.size	4.77527e-17	1.71535e-15	DUSP10	FALSE
CRNDE	OK	negbinomial.size	4.89001e-17	1.75388e-15	CRNDE	FALSE
RPL38	OK	negbinomial.size	6.37306e-17	2.2823e-15	RPL38	FALSE
POLD4	OK	negbinomial.size	6.65029e-17	2.37794e-15	POLD4	FALSE
TRIM54	OK	negbinomial.size	7.01003e-17	2.50274e-15	TRIM54	TRUE
DKK1	OK	negbinomial.size	7.16775e-17	2.55515e-15	DKK1	TRUE
CDKN2A	OK	negbinomial.size	7.79988e-17	2.77626e-15	CDKN2A	FALSE
CD47	OK	negbinomial.size	7.93783e-17	2.82107e-15	CD47	FALSE
MAFB	OK	negbinomial.size	7.99991e-17	2.83881e-15	MAFB	FALSE
NFKBIA	OK	negbinomial.size	8.20625e-17	2.90762e-15	NFKBIA	TRUE
TEX264	OK	negbinomial.size	8.29125e-17	2.9333e-15	TEX264	FALSE
INADL	OK	negbinomial.size	8.47968e-17	2.99543e-15	INADL	FALSE
CD81	OK	negbinomial.size	9.4063e-17	3.31774e-15	CD81	TRUE
PTBP3	OK	negbinomial.size	9.48964e-17	3.3421e-15	PTBP3	FALSE
TNFSF9	OK	negbinomial.size	9.58153e-17	3.36939e-15	TNFSF9	FALSE
GEM	OK	negbinomial.size	1.02207e-16	3.58875e-15	GEM	FALSE
CIB1	OK	negbinomial.size	1.03569e-16	3.63114e-15	CIB1	FALSE
JOSD1	OK	negbinomial.size	1.06182e-16	3.71717e-15	JOSD1	FALSE
YOD1	OK	negbinomial.size	1.09541e-16	3.82901e-15	YOD1	FALSE
KRT18	OK	negbinomial.size	1.14358e-16	3.99143e-15	KRT18	TRUE
APRT	OK	negbinomial.size	1.36703e-16	4.76423e-15	APRT	FALSE
HN1	OK	negbinomial.size	1.52193e-16	5.29619e-15	HN1	FALSE
KIF12	OK	negbinomial.size	1.59435e-16	5.53994e-15	KIF12	FALSE
SLC2A1	OK	negbinomial.size	1.61797e-16	5.6137e-15	SLC2A1	FALSE
IGF2	OK	negbinomial.size	1.69689e-16	5.87877e-15	IGF2	FALSE
MMP1	OK	negbinomial.size	1.70797e-16	5.90842e-15	MMP1	FALSE
VILL	OK	negbinomial.size	1.78666e-16	6.17149e-15	VILL	FALSE
RALGPS2	OK	negbinomial.size	1.86053e-16	6.41719e-15	RALGPS2	FALSE
STEAP2	OK	negbinomial.size	2.01277e-16	6.93204e-15	STEAP2	FALSE
CXCL3	OK	negbinomial.size	2.28165e-16	7.84654e-15	CXCL3	TRUE
TACC1	OK	negbinomial.size	2.35789e-16	8.09682e-15	TACC1	FALSE
GSN	OK	negbinomial.size	2.44991e-16	8.40047e-15	GSN	FALSE
LETM2	OK	negbinomial.size	2.48758e-16	8.51715e-15	LETM2	FALSE
NKTR	OK	negbinomial.size	2.67599e-16	9.14883e-15	NKTR	TRUE
MALL	OK	negbinomial.size	2.74484e-16	9.37053e-15	MALL	FALSE
AGR3	OK	negbinomial.size	2.88214e-16	9.82489e-15	AGR3	FALSE
RPL39L	OK	negbinomial.size	3.1802e-16	1.08252e-14	RPL39L	FALSE
ATG16L2	OK	negbinomial.size	3.20355e-16	1.08888e-14	ATG16L2	FALSE
ABHD3	OK	negbinomial.size	3.29154e-16	1.11716e-14	ABHD3	FALSE
IRAK1	OK	negbinomial.size	3.47921e-16	1.17773e-14	IRAK1	FALSE
NDUFA13	OK	negbinomial.size	3.48007e-16	1.17773e-14	NDUFA13	FALSE
TMEM45A	OK	negbinomial.size	3.72617e-16	1.2592e-14	TMEM45A	FALSE
MORF4L2	OK	negbinomial.size	3.81461e-16	1.28723e-14	MORF4L2	FALSE
SERF2	OK	negbinomial.size	4.15459e-16	1.39993e-14	SERF2	FALSE
AREG	OK	negbinomial.size	4.24775e-16	1.42926e-14	AREG	FALSE
DNAJA1	OK	negbinomial.size	4.33447e-16	1.45634e-14	DNAJA1	FALSE
NUPR1	OK	negbinomial.size	4.73459e-16	1.5885e-14	NUPR1	TRUE
LLPH	OK	negbinomial.size	4.99365e-16	1.67302e-14	LLPH	FALSE
NHS	OK	negbinomial.size	5.08619e-16	1.70158e-14	NHS	FALSE
HNF4A	OK	negbinomial.size	5.20792e-16	1.73912e-14	HNF4A	FALSE
TPM4	OK	negbinomial.size	5.21328e-16	1.73912e-14	TPM4	FALSE
ECHDC2	OK	negbinomial.size	5.52175e-16	1.8394e-14	ECHDC2	FALSE
ZFP36L2	OK	negbinomial.size	5.58557e-16	1.85802e-14	ZFP36L2	TRUE
GNAS	OK	negbinomial.size	5.83998e-16	1.93989e-14	GNAS	FALSE
TMEM63B	OK	negbinomial.size	6.32726e-16	2.09877e-14	TMEM63B	FALSE
CYSTM1	OK	negbinomial.size	6.44314e-16	2.13418e-14	CYSTM1	TRUE
MUC12	OK	negbinomial.size	7.03418e-16	2.32665e-14	MUC12	FALSE
CTBP1	OK	negbinomial.size	7.18498e-16	2.37317e-14	CTBP1	FALSE
PLA2G2A	OK	negbinomial.size	7.98324e-16	2.63312e-14	PLA2G2A	FALSE
HLA-DPA1	OK	negbinomial.size	8.73925e-16	2.87841e-14	HLA-DPA1	FALSE
RBCK1	OK	negbinomial.size	8.97182e-16	2.95086e-14	RBCK1	TRUE
B3GALT5	OK	negbinomial.size	9.13619e-16	3.0007e-14	B3GALT5	FALSE
CTDSPL	OK	negbinomial.size	9.28028e-16	3.04375e-14	CTDSPL	FALSE
RPS3	OK	negbinomial.size	9.76048e-16	3.19676e-14	RPS3	FALSE
RER1	OK	negbinomial.size	9.79424e-16	3.20333e-14	RER1	FALSE
ZDHHC2	OK	negbinomial.size	9.87733e-16	3.226e-14	ZDHHC2	FALSE
IFI27	OK	negbinomial.size	1.08586e-15	3.54153e-14	IFI27	TRUE
NDUFB10	OK	negbinomial.size	1.10761e-15	3.60745e-14	NDUFB10	FALSE
SLC9B2	OK	negbinomial.size	1.16863e-15	3.80089e-14	SLC9B2	FALSE
BUD31	OK	negbinomial.size	1.17891e-15	3.82902e-14	BUD31	FALSE
PNPLA8	OK	negbinomial.size	1.27211e-15	4.12597e-14	PNPLA8	FALSE
PDIA3	OK	negbinomial.size	1.4592e-15	4.72624e-14	PDIA3	FALSE
MEF2A	OK	negbinomial.size	1.53057e-15	4.95055e-14	MEF2A	FALSE
SORBS2	OK	negbinomial.size	1.57836e-15	5.09807e-14	SORBS2	FALSE
CSDE1	OK	negbinomial.size	1.60856e-15	5.18844e-14	CSDE1	FALSE
MTDH	OK	negbinomial.size	1.61736e-15	5.20963e-14	MTDH	TRUE
OCLN	OK	negbinomial.size	1.68556e-15	5.42186e-14	OCLN	FALSE
MAFF	OK	negbinomial.size	1.69477e-15	5.44399e-14	MAFF	FALSE
CORO1A	OK	negbinomial.size	1.84853e-15	5.92494e-14	CORO1A	FALSE
AHNAK	OK	negbinomial.size	1.84956e-15	5.92494e-14	AHNAK	TRUE
GCC2	OK	negbinomial.size	1.86016e-15	5.95072e-14	GCC2	FALSE
HILPDA	OK	negbinomial.size	1.95355e-15	6.24094e-14	HILPDA	FALSE
RP11-496I9.1	OK	negbinomial.size	2.05506e-15	6.5563e-14	RP11-496I9.1	FALSE
STT3B	OK	negbinomial.size	2.0767e-15	6.61631e-14	STT3B	FALSE
COX6B2	OK	negbinomial.size	2.27946e-15	7.25241e-14	COX6B2	FALSE
EPHX1	OK	negbinomial.size	2.35306e-15	7.4764e-14	EPHX1	FALSE
PLOD2	OK	negbinomial.size	2.39728e-15	7.60655e-14	PLOD2	FALSE
P4HTM	OK	negbinomial.size	2.40444e-15	7.61894e-14	P4HTM	FALSE
CACYBP	OK	negbinomial.size	2.54637e-15	8.05775e-14	CACYBP	FALSE
EDIL3	OK	negbinomial.size	2.59657e-15	8.2055e-14	EDIL3	FALSE
CST6	OK	negbinomial.size	2.71753e-15	8.57617e-14	CST6	FALSE
ZNF787	OK	negbinomial.size	2.73226e-15	8.61103e-14	ZNF787	FALSE
PTMS	OK	negbinomial.size	2.86888e-15	9.02945e-14	PTMS	TRUE
CACNA1D	OK	negbinomial.size	3.01915e-15	9.48963e-14	CACNA1D	FALSE
MAD2L1BP	OK	negbinomial.size	3.16788e-15	9.94373e-14	MAD2L1BP	FALSE
SPRY1	OK	negbinomial.size	3.17555e-15	9.95447e-14	SPRY1	FALSE
SLC25A5	OK	negbinomial.size	3.18696e-15	9.97684e-14	SLC25A5	TRUE
GADD45G	OK	negbinomial.size	3.30122e-15	1.03207e-13	GADD45G	FALSE
CHDH	OK	negbinomial.size	3.35487e-15	1.04745e-13	CHDH	FALSE
GTF2H2	OK	negbinomial.size	3.61715e-15	1.12783e-13	GTF2H2	FALSE
TRA2B	OK	negbinomial.size	3.65674e-15	1.13865e-13	TRA2B	FALSE
TBCC	OK	negbinomial.size	3.89397e-15	1.21091e-13	TBCC	FALSE
FER1L6	OK	negbinomial.size	3.93129e-15	1.22089e-13	FER1L6	FALSE
IRF3	OK	negbinomial.size	3.99141e-15	1.23792e-13	IRF3	FALSE
ARHGEF40	OK	negbinomial.size	4.0401e-15	1.25136e-13	ARHGEF40	FALSE
MCCC2	OK	negbinomial.size	4.26763e-15	1.32009e-13	MCCC2	FALSE
CES2	OK	negbinomial.size	4.32724e-15	1.33676e-13	CES2	TRUE
ZNF703	OK	negbinomial.size	4.36443e-15	1.34647e-13	ZNF703	FALSE
HEXIM1	OK	negbinomial.size	4.44287e-15	1.36886e-13	HEXIM1	TRUE
TUBB2A	OK	negbinomial.size	4.51414e-15	1.38899e-13	TUBB2A	FALSE
ITGB6	OK	negbinomial.size	4.54624e-15	1.39703e-13	ITGB6	TRUE
CLRN3	OK	negbinomial.size	4.70724e-15	1.4446e-13	CLRN3	FALSE
ETV3	OK	negbinomial.size	5.03395e-15	1.54284e-13	ETV3	FALSE
GKN1	OK	negbinomial.size	5.06304e-15	1.54973e-13	GKN1	TRUE
SLC6A20	OK	negbinomial.size	5.07886e-15	1.55254e-13	SLC6A20	FALSE
TMED2	OK	negbinomial.size	5.26764e-15	1.60814e-13	TMED2	FALSE
IFRD1	OK	negbinomial.size	5.29205e-15	1.61349e-13	IFRD1	TRUE
PPCS	OK	negbinomial.size	5.43311e-15	1.65434e-13	PPCS	FALSE
POLR2A	OK	negbinomial.size	5.50075e-15	1.67276e-13	POLR2A	TRUE
SUN1	OK	negbinomial.size	5.51677e-15	1.67545e-13	SUN1	FALSE
TJP1	OK	negbinomial.size	5.59461e-15	1.69689e-13	TJP1	FALSE
NHLRC3	OK	negbinomial.size	5.95061e-15	1.80253e-13	NHLRC3	FALSE
CSTA	OK	negbinomial.size	5.9635e-15	1.80409e-13	CSTA	TRUE
IGFBP7	OK	negbinomial.size	6.13001e-15	1.85207e-13	IGFBP7	FALSE
TRAK1	OK	negbinomial.size	6.55844e-15	1.97896e-13	TRAK1	FALSE
H3F3A	OK	negbinomial.size	6.5894e-15	1.98573e-13	H3F3A	FALSE
CCK	OK	negbinomial.size	6.59813e-15	1.98581e-13	CCK	FALSE
IER5L	OK	negbinomial.size	6.78814e-15	2.04037e-13	IER5L	FALSE
ZNF587	OK	negbinomial.size	6.88463e-15	2.06671e-13	ZNF587	FALSE
SHFM1	OK	negbinomial.size	7.17762e-15	2.15191e-13	SHFM1	FALSE
RPL37	OK	negbinomial.size	7.26601e-15	2.17562e-13	RPL37	FALSE
RNASE1	OK	negbinomial.size	7.29535e-15	2.18161e-13	RNASE1	TRUE
PRMT1	OK	negbinomial.size	7.57353e-15	2.2598e-13	PRMT1	FALSE
CD44	OK	negbinomial.size	7.57615e-15	2.2598e-13	CD44	TRUE
SPG11	OK	negbinomial.size	7.81782e-15	2.32891e-13	SPG11	FALSE
SMIM22	OK	negbinomial.size	7.91801e-15	2.35576e-13	SMIM22	FALSE
YPEL5	OK	negbinomial.size	8.69982e-15	2.58507e-13	YPEL5	FALSE
PLCB3	OK	negbinomial.size	9.2593e-15	2.74783e-13	PLCB3	FALSE
RP11-702H23.6	OK	negbinomial.size	9.43561e-15	2.7966e-13	RP11-702H23.6	FALSE
ETFB	OK	negbinomial.size	9.51917e-15	2.8178e-13	ETFB	FALSE
ADIPOR1	OK	negbinomial.size	9.67975e-15	2.86133e-13	ADIPOR1	FALSE
EPCAM	OK	negbinomial.size	9.70101e-15	2.86133e-13	EPCAM	FALSE
RP11-532F12.5	OK	negbinomial.size	9.70294e-15	2.86133e-13	RP11-532F12.5	FALSE
RP1-60O19.1	OK	negbinomial.size	1.02099e-14	3.00704e-13	RP1-60O19.1	FALSE
HIST1H4C	OK	negbinomial.size	1.03399e-14	3.04149e-13	HIST1H4C	TRUE
THOC7	OK	negbinomial.size	1.03908e-14	3.05263e-13	THOC7	FALSE
FAM195A	OK	negbinomial.size	1.08027e-14	3.16965e-13	FAM195A	FALSE
DDOST	OK	negbinomial.size	1.11028e-14	3.25361e-13	DDOST	FALSE
NFKBIZ	OK	negbinomial.size	1.12843e-14	3.30267e-13	NFKBIZ	TRUE
AZIN1	OK	negbinomial.size	1.13751e-14	3.3251e-13	AZIN1	TRUE
LRBA	OK	negbinomial.size	1.20962e-14	3.53144e-13	LRBA	FALSE
ANO6	OK	negbinomial.size	1.21336e-14	3.53797e-13	ANO6	FALSE
C6orf132	OK	negbinomial.size	1.28332e-14	3.73728e-13	C6orf132	FALSE
ACOT11	OK	negbinomial.size	1.34261e-14	3.90509e-13	ACOT11	FALSE
TMEM168	OK	negbinomial.size	1.45576e-14	4.22893e-13	TMEM168	FALSE
UNC93B1	OK	negbinomial.size	1.54446e-14	4.48105e-13	UNC93B1	FALSE
MED1	OK	negbinomial.size	1.62538e-14	4.70999e-13	MED1	FALSE
DIO3OS	OK	negbinomial.size	1.70909e-14	4.94641e-13	DIO3OS	FALSE
ABL2	OK	negbinomial.size	1.81766e-14	5.25413e-13	ABL2	FALSE
C6orf141	OK	negbinomial.size	1.89566e-14	5.47283e-13	C6orf141	FALSE
UQCRB	OK	negbinomial.size	2.0945e-14	6.03944e-13	UQCRB	FALSE
HIGD2A	OK	negbinomial.size	2.10951e-14	6.07524e-13	HIGD2A	FALSE
RAB21	OK	negbinomial.size	2.14361e-14	6.16585e-13	RAB21	FALSE
PLBD1	OK	negbinomial.size	2.1501e-14	6.17284e-13	PLBD1	FALSE
STX1A	OK	negbinomial.size	2.15132e-14	6.17284e-13	STX1A	FALSE
RPL15	OK	negbinomial.size	2.21141e-14	6.33749e-13	RPL15	FALSE
PRKACB	OK	negbinomial.size	2.28443e-14	6.53873e-13	PRKACB	FALSE
TMSB4X	OK	negbinomial.size	2.29781e-14	6.56897e-13	TMSB4X	TRUE
TTC39A	OK	negbinomial.size	2.43295e-14	6.94682e-13	TTC39A	FALSE
IDI1	OK	negbinomial.size	2.51109e-14	7.1612e-13	IDI1	TRUE
MGAT1	OK	negbinomial.size	2.65661e-14	7.56696e-13	MGAT1	TRUE
TRAP1	OK	negbinomial.size	2.77925e-14	7.90665e-13	TRAP1	FALSE
REEP3	OK	negbinomial.size	2.86416e-14	8.13831e-13	REEP3	FALSE
RALBP1	OK	negbinomial.size	2.9404e-14	8.34008e-13	RALBP1	FALSE
GJB1	OK	negbinomial.size	2.9423e-14	8.34008e-13	GJB1	FALSE
SORL1	OK	negbinomial.size	2.96978e-14	8.40778e-13	SORL1	TRUE
PRPF31	OK	negbinomial.size	3.12376e-14	8.83303e-13	PRPF31	FALSE
GLB1	OK	negbinomial.size	3.13568e-14	8.85602e-13	GLB1	FALSE
PLA2G10	OK	negbinomial.size	3.3484e-14	9.4454e-13	PLA2G10	FALSE
NOSTRIN	OK	negbinomial.size	3.42447e-14	9.64834e-13	NOSTRIN	FALSE
FBXL20	OK	negbinomial.size	3.96583e-14	1.11601e-12	FBXL20	FALSE
EIF2S2	OK	negbinomial.size	4.42007e-14	1.24235e-12	EIF2S2	FALSE
AKR1C3	OK	negbinomial.size	4.43728e-14	1.24569e-12	AKR1C3	TRUE
KMT2E-AS1	OK	negbinomial.size	4.44892e-14	1.24746e-12	KMT2E-AS1	FALSE
ZNF331	OK	negbinomial.size	4.5256e-14	1.26744e-12	ZNF331	FALSE
MEX3C	OK	negbinomial.size	4.59815e-14	1.28622e-12	MEX3C	FALSE
FGFR2	OK	negbinomial.size	4.95931e-14	1.38559e-12	FGFR2	FALSE
FEM1C	OK	negbinomial.size	4.98151e-14	1.39013e-12	FEM1C	FALSE
UBE2M	OK	negbinomial.size	5.89091e-14	1.64194e-12	UBE2M	FALSE
NCMAP	OK	negbinomial.size	5.93288e-14	1.65167e-12	NCMAP	FALSE
TBCA	OK	negbinomial.size	5.96376e-14	1.65829e-12	TBCA	FALSE
BMP2	OK	negbinomial.size	6.09664e-14	1.69323e-12	BMP2	FALSE
CCDC59	OK	negbinomial.size	6.11745e-14	1.69699e-12	CCDC59	FALSE
TSPAN8	OK	negbinomial.size	6.22935e-14	1.72599e-12	TSPAN8	TRUE
ITGB3BP	OK	negbinomial.size	6.26823e-14	1.7347e-12	ITGB3BP	FALSE
PODXL	OK	negbinomial.size	6.38873e-14	1.76596e-12	PODXL	FALSE
GNLY	OK	negbinomial.size	6.54313e-14	1.80651e-12	GNLY	FALSE
NDUFAF3	OK	negbinomial.size	6.56281e-14	1.8098e-12	NDUFAF3	FALSE
GTF2IRD2	OK	negbinomial.size	6.59112e-14	1.81547e-12	GTF2IRD2	FALSE
PAK2	OK	negbinomial.size	6.6407e-14	1.82697e-12	PAK2	FALSE
SPCS1	OK	negbinomial.size	7.03184e-14	1.93231e-12	SPCS1	FALSE
DDX3Y	OK	negbinomial.size	7.18347e-14	1.97166e-12	DDX3Y	FALSE
ATG9B	OK	negbinomial.size	7.36107e-14	2.01804e-12	ATG9B	FALSE
PSMB7	OK	negbinomial.size	7.56022e-14	2.07021e-12	PSMB7	TRUE
SPOCK1	OK	negbinomial.size	7.80428e-14	2.13454e-12	SPOCK1	FALSE
PRSS23	OK	negbinomial.size	9.00343e-14	2.45964e-12	PRSS23	FALSE
RPS15A	OK	negbinomial.size	9.28632e-14	2.53396e-12	RPS15A	FALSE
SCGB3A1	OK	negbinomial.size	9.30345e-14	2.53568e-12	SCGB3A1	FALSE
SLC34A2	OK	negbinomial.size	9.59037e-14	2.61084e-12	SLC34A2	FALSE
MEAF6	OK	negbinomial.size	1.00486e-13	2.73239e-12	MEAF6	FALSE
TSHZ2	OK	negbinomial.size	1.02856e-13	2.79361e-12	TSHZ2	FALSE
DUSP1	OK	negbinomial.size	1.10156e-13	2.98838e-12	DUSP1	TRUE
STOM	OK	negbinomial.size	1.15838e-13	3.13891e-12	STOM	FALSE
LINC00152	OK	negbinomial.size	1.18804e-13	3.21554e-12	LINC00152	FALSE
RPS16	OK	negbinomial.size	1.19769e-13	3.23792e-12	RPS16	FALSE
CRYAB	OK	negbinomial.size	1.23793e-13	3.34283e-12	CRYAB	FALSE
AHSA2	OK	negbinomial.size	1.269e-13	3.4228e-12	AHSA2	FALSE
ATG12	OK	negbinomial.size	1.33628e-13	3.60011e-12	ATG12	FALSE
PDLIM7	OK	negbinomial.size	1.33999e-13	3.60594e-12	PDLIM7	TRUE
ATP5G3	OK	negbinomial.size	1.36594e-13	3.67154e-12	ATP5G3	FALSE
SERBP1	OK	negbinomial.size	1.36956e-13	3.67606e-12	SERBP1	FALSE
C9orf16	OK	negbinomial.size	1.37076e-13	3.67606e-12	C9orf16	FALSE
NME1-NME2	OK	negbinomial.size	1.53909e-13	4.12276e-12	NME1-NME2	FALSE
HSD17B11	OK	negbinomial.size	1.60667e-13	4.29886e-12	HSD17B11	FALSE
DDX3X	OK	negbinomial.size	1.63465e-13	4.36871e-12	DDX3X	FALSE
C2orf88	OK	negbinomial.size	1.67844e-13	4.48064e-12	C2orf88	FALSE
RP11-734K21.3	OK	negbinomial.size	1.71369e-13	4.56952e-12	RP11-734K21.3	FALSE
ATP6V1F	OK	negbinomial.size	1.79406e-13	4.77837e-12	ATP6V1F	FALSE
NSD1	OK	negbinomial.size	1.8475e-13	4.9151e-12	NSD1	FALSE
SULT1A1	OK	negbinomial.size	1.90425e-13	5.06032e-12	SULT1A1	FALSE
HEXB	OK	negbinomial.size	1.91978e-13	5.09582e-12	HEXB	FALSE
POLE3	OK	negbinomial.size	1.93242e-13	5.12354e-12	POLE3	FALSE
PRRC2C	OK	negbinomial.size	2.03916e-13	5.40041e-12	PRRC2C	TRUE
RTCA	OK	negbinomial.size	2.07883e-13	5.49925e-12	RTCA	FALSE
HCLS1	OK	negbinomial.size	2.16342e-13	5.71657e-12	HCLS1	FALSE
RAP1GAP	OK	negbinomial.size	2.1835e-13	5.76311e-12	RAP1GAP	FALSE
RAB3B	OK	negbinomial.size	2.26469e-13	5.97067e-12	RAB3B	FALSE
DPYD	OK	negbinomial.size	2.45729e-13	6.47114e-12	DPYD	FALSE
PDE7A	OK	negbinomial.size	2.46255e-13	6.4777e-12	PDE7A	FALSE
RABGGTB	OK	negbinomial.size	2.52e-13	6.62136e-12	RABGGTB	FALSE
NDUFA6	OK	negbinomial.size	2.6554e-13	6.96931e-12	NDUFA6	FALSE
WDR72	OK	negbinomial.size	2.75185e-13	7.21436e-12	WDR72	FALSE
MIR142	OK	negbinomial.size	2.85957e-13	7.48836e-12	MIR142	FALSE
PSD4	OK	negbinomial.size	2.94331e-13	7.69902e-12	PSD4	FALSE
CDKN2B	OK	negbinomial.size	3.0988e-13	8.09671e-12	CDKN2B	FALSE
PSMA1	OK	negbinomial.size	3.33017e-13	8.69153e-12	PSMA1	FALSE
KRT23	OK	negbinomial.size	3.35581e-13	8.74869e-12	KRT23	TRUE
P4HA2	OK	negbinomial.size	3.39712e-13	8.8465e-12	P4HA2	FALSE
ENC1	OK	negbinomial.size	3.48648e-13	9.06912e-12	ENC1	TRUE
SNRNP200	OK	negbinomial.size	3.55034e-13	9.22496e-12	SNRNP200	FALSE
PSMD8	OK	negbinomial.size	3.67109e-13	9.52182e-12	PSMD8	FALSE
PIK3C2G	OK	negbinomial.size	3.67273e-13	9.52182e-12	PIK3C2G	FALSE
FUBP1	OK	negbinomial.size	3.75268e-13	9.71831e-12	FUBP1	FALSE
ENO2	OK	negbinomial.size	3.84612e-13	9.94927e-12	ENO2	FALSE
HDAC1	OK	negbinomial.size	3.86208e-13	9.97952e-12	HDAC1	FALSE
HOMER3	OK	negbinomial.size	3.9592e-13	1.02192e-11	HOMER3	FALSE
SEMA7A	OK	negbinomial.size	3.99099e-13	1.02899e-11	SEMA7A	FALSE
FSCN1	OK	negbinomial.size	4.14315e-13	1.06704e-11	FSCN1	FALSE
MTUS1	OK	negbinomial.size	4.14836e-13	1.06721e-11	MTUS1	FALSE
PKP1	OK	negbinomial.size	4.17974e-13	1.0741e-11	PKP1	FALSE
EHBP1	OK	negbinomial.size	4.19021e-13	1.07561e-11	EHBP1	FALSE
TWF1	OK	negbinomial.size	4.26677e-13	1.09406e-11	TWF1	FALSE
SLC44A5	OK	negbinomial.size	4.31383e-13	1.10492e-11	SLC44A5	FALSE
RBM6	OK	negbinomial.size	4.91093e-13	1.25648e-11	RBM6	FALSE
IFIT2	OK	negbinomial.size	4.92863e-13	1.25963e-11	IFIT2	FALSE
RAD21	OK	negbinomial.size	5.26193e-13	1.34334e-11	RAD21	FALSE
GPRC5A	OK	negbinomial.size	5.68852e-13	1.45067e-11	GPRC5A	TRUE
C19orf10	OK	negbinomial.size	5.72881e-13	1.45935e-11	C19orf10	TRUE
COX17	OK	negbinomial.size	5.97619e-13	1.52071e-11	COX17	FALSE
ADD3	OK	negbinomial.size	6.4455e-13	1.63835e-11	ADD3	FALSE
CYR61	OK	negbinomial.size	6.55811e-13	1.66516e-11	CYR61	FALSE
CDKN1C	OK	negbinomial.size	6.64531e-13	1.68547e-11	CDKN1C	FALSE
RRBP1	OK	negbinomial.size	6.83563e-13	1.73186e-11	RRBP1	TRUE
GMCL1	OK	negbinomial.size	6.92359e-13	1.75225e-11	GMCL1	FALSE
PRDX3	OK	negbinomial.size	7.10653e-13	1.79661e-11	PRDX3	FALSE
NAV2	OK	negbinomial.size	7.21678e-13	1.82251e-11	NAV2	FALSE
LMNA	OK	negbinomial.size	7.28064e-13	1.83665e-11	LMNA	FALSE
CALB1	OK	negbinomial.size	7.56564e-13	1.90649e-11	CALB1	FALSE
GJC2	OK	negbinomial.size	7.73947e-13	1.9482e-11	GJC2	FALSE
PRSS21	OK	negbinomial.size	7.8385e-13	1.971e-11	PRSS21	FALSE
AGL	OK	negbinomial.size	7.89142e-13	1.98218e-11	AGL	FALSE
FERMT1	OK	negbinomial.size	7.91619e-13	1.98627e-11	FERMT1	TRUE
SLC5A1	OK	negbinomial.size	8.19698e-13	2.05452e-11	SLC5A1	FALSE
CAPN12	OK	negbinomial.size	8.24519e-13	2.06439e-11	CAPN12	FALSE
TSPAN12	OK	negbinomial.size	8.31557e-13	2.07978e-11	TSPAN12	FALSE
SUMF2	OK	negbinomial.size	8.32532e-13	2.08e-11	SUMF2	FALSE
MSI2	OK	negbinomial.size	8.33986e-13	2.08141e-11	MSI2	FALSE
GIPC2	OK	negbinomial.size	8.53729e-13	2.12841e-11	GIPC2	FALSE
ATRX	OK	negbinomial.size	8.89613e-13	2.21551e-11	ATRX	FALSE
NAIP	OK	negbinomial.size	9.11668e-13	2.26802e-11	NAIP	FALSE
TBC1D17	OK	negbinomial.size	9.27191e-13	2.30418e-11	TBC1D17	FALSE
OST4	OK	negbinomial.size	9.45292e-13	2.34667e-11	OST4	FALSE
THNSL2	OK	negbinomial.size	1.01999e-12	2.52942e-11	THNSL2	FALSE
BAG3	OK	negbinomial.size	1.0444e-12	2.5872e-11	BAG3	FALSE
ID1	OK	negbinomial.size	1.08101e-12	2.67506e-11	ID1	TRUE
ARHGAP9	OK	negbinomial.size	1.10444e-12	2.72999e-11	ARHGAP9	FALSE
TMOD3	OK	negbinomial.size	1.10554e-12	2.72999e-11	TMOD3	FALSE
CHD2	OK	negbinomial.size	1.15262e-12	2.84326e-11	CHD2	FALSE
CNTD2	OK	negbinomial.size	1.21398e-12	2.99147e-11	CNTD2	FALSE
RAB2A	OK	negbinomial.size	1.25293e-12	3.08419e-11	RAB2A	FALSE
NOL7	OK	negbinomial.size	1.26211e-12	3.10351e-11	NOL7	FALSE
SPATS2L	OK	negbinomial.size	1.28496e-12	3.15637e-11	SPATS2L	FALSE
JUP	OK	negbinomial.size	1.28943e-12	3.16405e-11	JUP	FALSE
TLE4	OK	negbinomial.size	1.40871e-12	3.45312e-11	TLE4	FALSE
TM4SF20	OK	negbinomial.size	1.47722e-12	3.61726e-11	TM4SF20	FALSE
RGS16	OK	negbinomial.size	1.50624e-12	3.68384e-11	RGS16	FALSE
TSPAN13	OK	negbinomial.size	1.50756e-12	3.68384e-11	TSPAN13	FALSE
MUC6	OK	negbinomial.size	1.59047e-12	3.88237e-11	MUC6	FALSE
GRTP1	OK	negbinomial.size	1.60584e-12	3.91579e-11	GRTP1	FALSE
VNN2	OK	negbinomial.size	1.61443e-12	3.92861e-11	VNN2	FALSE
GALNT7	OK	negbinomial.size	1.61445e-12	3.92861e-11	GALNT7	FALSE
MAP4	OK	negbinomial.size	1.69327e-12	4.11613e-11	MAP4	FALSE
H1FX	OK	negbinomial.size	1.73583e-12	4.2152e-11	H1FX	TRUE
ESPN	OK	negbinomial.size	1.85159e-12	4.49165e-11	ESPN	FALSE
PRR13	OK	negbinomial.size	1.90577e-12	4.61828e-11	PRR13	FALSE
MIR210HG	OK	negbinomial.size	1.92649e-12	4.66366e-11	MIR210HG	FALSE
TJP2	OK	negbinomial.size	1.94358e-12	4.70016e-11	TJP2	FALSE
MATN2	OK	negbinomial.size	2.00117e-12	4.83444e-11	MATN2	FALSE
LUC7L3	OK	negbinomial.size	2.03034e-12	4.89985e-11	LUC7L3	TRUE
CDC26	OK	negbinomial.size	2.15388e-12	5.19262e-11	CDC26	FALSE
KRT80	OK	negbinomial.size	2.22585e-12	5.36062e-11	KRT80	FALSE
GADD45A	OK	negbinomial.size	2.25096e-12	5.4155e-11	GADD45A	TRUE
ACKR3	OK	negbinomial.size	2.45386e-12	5.89758e-11	ACKR3	FALSE
ARFGAP3	OK	negbinomial.size	2.66993e-12	6.41029e-11	ARFGAP3	FALSE
UQCRH	OK	negbinomial.size	2.6874e-12	6.44562e-11	UQCRH	FALSE
SGCB	OK	negbinomial.size	2.95199e-12	7.07297e-11	SGCB	FALSE
SH3RF1	OK	negbinomial.size	3.00005e-12	7.18077e-11	SH3RF1	FALSE
RASSF6	OK	negbinomial.size	3.00713e-12	7.19035e-11	RASSF6	TRUE
CYP2S1	OK	negbinomial.size	3.37473e-12	8.06109e-11	CYP2S1	FALSE
PAWR	OK	negbinomial.size	3.44089e-12	8.21074e-11	PAWR	FALSE
OSER1	OK	negbinomial.size	3.72421e-12	8.87775e-11	OSER1	FALSE
C5orf42	OK	negbinomial.size	3.73061e-12	8.88395e-11	C5orf42	FALSE
B3GNT5	OK	negbinomial.size	3.84048e-12	9.13629e-11	B3GNT5	FALSE
FOSL1	OK	negbinomial.size	4.02105e-12	9.55612e-11	FOSL1	FALSE
SREK1	OK	negbinomial.size	4.12108e-12	9.78391e-11	SREK1	FALSE
SKIL	OK	negbinomial.size	4.13748e-12	9.81287e-11	SKIL	FALSE
CST1	OK	negbinomial.size	4.17161e-12	9.88379e-11	CST1	FALSE
SOX6	OK	negbinomial.size	4.19424e-12	9.92737e-11	SOX6	FALSE
ARPC2	OK	negbinomial.size	4.27918e-12	1.01182e-10	ARPC2	FALSE
PRDX6	OK	negbinomial.size	4.35013e-12	1.02755e-10	PRDX6	FALSE
NDUFB3	OK	negbinomial.size	4.43757e-12	1.04715e-10	NDUFB3	FALSE
BCL2L15	OK	negbinomial.size	4.48964e-12	1.05837e-10	BCL2L15	FALSE
ARID4B	OK	negbinomial.size	4.71677e-12	1.11079e-10	ARID4B	FALSE
ESD	OK	negbinomial.size	5.1641e-12	1.21491e-10	ESD	TRUE
RAP1B	OK	negbinomial.size	5.24572e-12	1.23287e-10	RAP1B	FALSE
EZR	OK	negbinomial.size	5.35428e-12	1.25713e-10	EZR	TRUE
LRPPRC	OK	negbinomial.size	5.49089e-12	1.28791e-10	LRPPRC	FALSE
PHB	OK	negbinomial.size	5.50832e-12	1.2907e-10	PHB	FALSE
KLK11	OK	negbinomial.size	5.53719e-12	1.29617e-10	KLK11	FALSE
MMEL1	OK	negbinomial.size	5.59087e-12	1.30742e-10	MMEL1	FALSE
ARPC5L	OK	negbinomial.size	5.78481e-12	1.35143e-10	ARPC5L	FALSE
SYNE2	OK	negbinomial.size	5.883e-12	1.37299e-10	SYNE2	TRUE
FMNL1	OK	negbinomial.size	5.92475e-12	1.38136e-10	FMNL1	FALSE
CSF2	OK	negbinomial.size	6.22372e-12	1.44962e-10	CSF2	FALSE
C1GALT1	OK	negbinomial.size	6.53098e-12	1.51967e-10	C1GALT1	FALSE
CLINT1	OK	negbinomial.size	6.83288e-12	1.58834e-10	CLINT1	FALSE
MAF	OK	negbinomial.size	6.90898e-12	1.60443e-10	MAF	FALSE
RHOF	OK	negbinomial.size	6.9691e-12	1.61679e-10	RHOF	FALSE
N4BP2L2	OK	negbinomial.size	7.04936e-12	1.63379e-10	N4BP2L2	FALSE
DPH6	OK	negbinomial.size	7.06226e-12	1.63516e-10	DPH6	FALSE
MAP4K4	OK	negbinomial.size	7.09265e-12	1.64057e-10	MAP4K4	TRUE
FXYD2	OK	negbinomial.size	7.19117e-12	1.66172e-10	FXYD2	TRUE
CREBRF	OK	negbinomial.size	7.23237e-12	1.66958e-10	CREBRF	TRUE
KITLG	OK	negbinomial.size	7.5682e-12	1.74539e-10	KITLG	FALSE
HNRNPF	OK	negbinomial.size	7.63153e-12	1.75826e-10	HNRNPF	FALSE
HBP1	OK	negbinomial.size	8.16941e-12	1.88033e-10	HBP1	FALSE
RPL7L1	OK	negbinomial.size	8.41903e-12	1.93588e-10	RPL7L1	FALSE
IRX5	OK	negbinomial.size	8.77465e-12	2.01567e-10	IRX5	FALSE
SYNGR2	OK	negbinomial.size	9.13468e-12	2.09632e-10	SYNGR2	FALSE
ALDH2	OK	negbinomial.size	9.25788e-12	2.12251e-10	ALDH2	FALSE
NFIC	OK	negbinomial.size	9.34638e-12	2.1407e-10	NFIC	FALSE
HLA-DQA1	OK	negbinomial.size	9.66566e-12	2.21166e-10	HLA-DQA1	FALSE
PDK4	OK	negbinomial.size	9.83821e-12	2.24894e-10	PDK4	FALSE
GGT1	OK	negbinomial.size	9.85735e-12	2.25112e-10	GGT1	FALSE
PTPN18	OK	negbinomial.size	9.88247e-12	2.25465e-10	PTPN18	FALSE
COL6A1	OK	negbinomial.size	1.02531e-11	2.33693e-10	COL6A1	FALSE
SRGN	OK	negbinomial.size	1.0268e-11	2.33806e-10	SRGN	FALSE
GSTP1	OK	negbinomial.size	1.19185e-11	2.71122e-10	GSTP1	TRUE
EMP2	OK	negbinomial.size	1.20505e-11	2.7386e-10	EMP2	FALSE
DAAM1	OK	negbinomial.size	1.20714e-11	2.74068e-10	DAAM1	FALSE
GRIN2A	OK	negbinomial.size	1.22447e-11	2.77732e-10	GRIN2A	FALSE
AFMID	OK	negbinomial.size	1.23568e-11	2.80005e-10	AFMID	FALSE
FOLR1	OK	negbinomial.size	1.24635e-11	2.82147e-10	FOLR1	FALSE
MNDA	OK	negbinomial.size	1.2489e-11	2.82451e-10	MNDA	FALSE
CDC37L1	OK	negbinomial.size	1.29545e-11	2.92697e-10	CDC37L1	FALSE
PLAC8	OK	negbinomial.size	1.30318e-11	2.94158e-10	PLAC8	TRUE
EIF5	OK	negbinomial.size	1.33556e-11	3.01176e-10	EIF5	FALSE
C1orf21	OK	negbinomial.size	1.46281e-11	3.29555e-10	C1orf21	FALSE
VIPR1	OK	negbinomial.size	1.49239e-11	3.35895e-10	VIPR1	FALSE
MFGE8	OK	negbinomial.size	1.55452e-11	3.49544e-10	MFGE8	FALSE
CTSE	OK	negbinomial.size	1.56622e-11	3.51834e-10	CTSE	TRUE
ATM	OK	negbinomial.size	1.57078e-11	3.5252e-10	ATM	FALSE
CNPY2	OK	negbinomial.size	1.58468e-11	3.55299e-10	CNPY2	FALSE
CEBPG	OK	negbinomial.size	1.59826e-11	3.58001e-10	CEBPG	FALSE
TOP2B	OK	negbinomial.size	1.6097e-11	3.60219e-10	TOP2B	FALSE
ATF4	OK	negbinomial.size	1.63186e-11	3.64829e-10	ATF4	FALSE
TM2D3	OK	negbinomial.size	1.69067e-11	3.77616e-10	TM2D3	FALSE
COX6A1	OK	negbinomial.size	1.71125e-11	3.81848e-10	COX6A1	FALSE
RP11-485G4.2	OK	negbinomial.size	1.72584e-11	3.84735e-10	RP11-485G4.2	FALSE
RBBP4	OK	negbinomial.size	1.76442e-11	3.92962e-10	RBBP4	FALSE
ZFP36	OK	negbinomial.size	1.80927e-11	4.02568e-10	ZFP36	TRUE
NPEPPS	OK	negbinomial.size	1.81751e-11	4.04015e-10	NPEPPS	FALSE
LLGL2	OK	negbinomial.size	1.87887e-11	4.17259e-10	LLGL2	FALSE
PPA1	OK	negbinomial.size	1.88979e-11	4.19287e-10	PPA1	FALSE
FAM65B	OK	negbinomial.size	1.98123e-11	4.39158e-10	FAM65B	FALSE
VWA1	OK	negbinomial.size	1.99907e-11	4.42691e-10	VWA1	FALSE
NOXO1	OK	negbinomial.size	2.04439e-11	4.52301e-10	NOXO1	FALSE
EXTL3	OK	negbinomial.size	2.058e-11	4.5488e-10	EXTL3	FALSE
FRAS1	OK	negbinomial.size	2.09903e-11	4.63511e-10	FRAS1	FALSE
SLC25A6	OK	negbinomial.size	2.11497e-11	4.66591e-10	SLC25A6	FALSE
DUS1L	OK	negbinomial.size	2.31971e-11	5.11277e-10	DUS1L	FALSE
PGRMC2	OK	negbinomial.size	2.4138e-11	5.31513e-10	PGRMC2	FALSE
AHCY	OK	negbinomial.size	2.41919e-11	5.32198e-10	AHCY	FALSE
ZNF33B	OK	negbinomial.size	2.46491e-11	5.41747e-10	ZNF33B	FALSE
KIAA1109	OK	negbinomial.size	2.49278e-11	5.47358e-10	KIAA1109	FALSE
SMPD3	OK	negbinomial.size	2.61365e-11	5.7336e-10	SMPD3	FALSE
MEA1	OK	negbinomial.size	2.64067e-11	5.78745e-10	MEA1	FALSE
LYSMD2	OK	negbinomial.size	2.69246e-11	5.89544e-10	LYSMD2	FALSE
ZBTB37	OK	negbinomial.size	3.00611e-11	6.57604e-10	ZBTB37	FALSE
SERPING1	OK	negbinomial.size	3.02705e-11	6.61566e-10	SERPING1	FALSE
SERPINB6	OK	negbinomial.size	3.12034e-11	6.81318e-10	SERPINB6	FALSE
GRSF1	OK	negbinomial.size	3.17375e-11	6.92333e-10	GRSF1	FALSE
H2AFZ	OK	negbinomial.size	3.31825e-11	7.2318e-10	H2AFZ	TRUE
BBC3	OK	negbinomial.size	3.33968e-11	7.27173e-10	BBC3	FALSE
COQ10B	OK	negbinomial.size	3.52612e-11	7.67054e-10	COQ10B	FALSE
PPP1R14D	OK	negbinomial.size	3.57132e-11	7.76164e-10	PPP1R14D	FALSE
PTPRS	OK	negbinomial.size	3.6094e-11	7.83713e-10	PTPRS	FALSE
MAFA	OK	negbinomial.size	3.62444e-11	7.86249e-10	MAFA	FALSE
CTDSP1	OK	negbinomial.size	3.6678e-11	7.94916e-10	CTDSP1	FALSE
MPZL3	OK	negbinomial.size	3.67526e-11	7.95797e-10	MPZL3	FALSE
MBNL3	OK	negbinomial.size	3.68842e-11	7.97907e-10	MBNL3	FALSE
HS2ST1	OK	negbinomial.size	3.71941e-11	8.03867e-10	HS2ST1	FALSE
GTF2IRD2B	OK	negbinomial.size	3.72329e-11	8.03962e-10	GTF2IRD2B	FALSE
UBE2V1	OK	negbinomial.size	3.80404e-11	8.20642e-10	UBE2V1	FALSE
MTMR11	OK	negbinomial.size	3.99685e-11	8.6144e-10	MTMR11	FALSE
TIA1	OK	negbinomial.size	4.08742e-11	8.80149e-10	TIA1	FALSE
FAM129B	OK	negbinomial.size	4.29932e-11	9.24927e-10	FAM129B	FALSE
TSEN34	OK	negbinomial.size	4.52452e-11	9.7248e-10	TSEN34	FALSE
MS4A8	OK	negbinomial.size	4.60404e-11	9.88664e-10	MS4A8	FALSE
RAN	OK	negbinomial.size	4.61552e-11	9.9022e-10	RAN	FALSE
MBOAT2	OK	negbinomial.size	4.98998e-11	1.06958e-09	MBOAT2	FALSE
CALR	OK	negbinomial.size	5.17782e-11	1.10882e-09	CALR	FALSE
TRIM28	OK	negbinomial.size	5.25413e-11	1.12413e-09	TRIM28	FALSE
ERAP1	OK	negbinomial.size	5.36362e-11	1.14651e-09	ERAP1	FALSE
HNRNPC	OK	negbinomial.size	5.48041e-11	1.17031e-09	HNRNPC	FALSE
POLR2K	OK	negbinomial.size	5.48497e-11	1.17031e-09	POLR2K	FALSE
PGD	OK	negbinomial.size	5.85818e-11	1.2488e-09	PGD	FALSE
GOLGA2	OK	negbinomial.size	5.9014e-11	1.25596e-09	GOLGA2	FALSE
NR4A1	OK	negbinomial.size	5.90249e-11	1.25596e-09	NR4A1	FALSE
HMGA2	OK	negbinomial.size	6.09516e-11	1.29578e-09	HMGA2	FALSE
CALU	OK	negbinomial.size	6.12364e-11	1.30065e-09	CALU	FALSE
ATG14	OK	negbinomial.size	6.23425e-11	1.32294e-09	ATG14	FALSE
OSBPL9	OK	negbinomial.size	6.24165e-11	1.32331e-09	OSBPL9	FALSE
LOXL1	OK	negbinomial.size	6.46435e-11	1.36928e-09	LOXL1	FALSE
KLF2	OK	negbinomial.size	6.50179e-11	1.37597e-09	KLF2	TRUE
D2HGDH	OK	negbinomial.size	6.5877e-11	1.39289e-09	D2HGDH	FALSE
CRYZ	OK	negbinomial.size	6.65978e-11	1.40686e-09	CRYZ	FALSE
MFSD3	OK	negbinomial.size	6.7371e-11	1.4219e-09	MFSD3	FALSE
SLC16A1	OK	negbinomial.size	6.74371e-11	1.42202e-09	SLC16A1	FALSE
PTRF	OK	negbinomial.size	6.95911e-11	1.46611e-09	PTRF	FALSE
RALGAPA2	OK	negbinomial.size	7.04804e-11	1.48351e-09	RALGAPA2	FALSE
PAIP1	OK	negbinomial.size	7.37036e-11	1.54996e-09	PAIP1	FALSE
PCGF2	OK	negbinomial.size	7.60942e-11	1.5988e-09	PCGF2	FALSE
PTMA	OK	negbinomial.size	8.01847e-11	1.68323e-09	PTMA	FALSE
RNF39	OK	negbinomial.size	8.16329e-11	1.7121e-09	RNF39	FALSE
TM2D1	OK	negbinomial.size	8.2065e-11	1.71962e-09	TM2D1	FALSE
SUCO	OK	negbinomial.size	8.23502e-11	1.72271e-09	SUCO	FALSE
PTGFRN	OK	negbinomial.size	8.23599e-11	1.72271e-09	PTGFRN	FALSE
MDFI	OK	negbinomial.size	8.28971e-11	1.73239e-09	MDFI	FALSE
COMMD8	OK	negbinomial.size	8.60825e-11	1.79736e-09	COMMD8	FALSE
MMP10	OK	negbinomial.size	8.7942e-11	1.83454e-09	MMP10	FALSE
AMICA1	OK	negbinomial.size	8.85172e-11	1.8449e-09	AMICA1	FALSE
DNAJB9	OK	negbinomial.size	9.17003e-11	1.90954e-09	DNAJB9	FALSE
PHYKPL	OK	negbinomial.size	9.52892e-11	1.98251e-09	PHYKPL	FALSE
HMOX1	OK	negbinomial.size	9.83093e-11	2.04352e-09	HMOX1	FALSE
IFI16	OK	negbinomial.size	1.00088e-10	2.07865e-09	IFI16	TRUE
HOXC10	OK	negbinomial.size	1.00203e-10	2.07916e-09	HOXC10	FALSE
FAM25A	OK	negbinomial.size	1.00291e-10	2.07916e-09	FAM25A	FALSE
RSL1D1	OK	negbinomial.size	1.01415e-10	2.09959e-09	RSL1D1	FALSE
CCNG1	OK	negbinomial.size	1.01456e-10	2.09959e-09	CCNG1	FALSE
IFRD2	OK	negbinomial.size	1.02882e-10	2.12723e-09	IFRD2	FALSE
PPA2	OK	negbinomial.size	1.03476e-10	2.13762e-09	PPA2	FALSE
TBL1X	OK	negbinomial.size	1.03657e-10	2.13947e-09	TBL1X	FALSE
EPB41L4A-AS1	OK	negbinomial.size	1.04762e-10	2.16037e-09	EPB41L4A-AS1	FALSE
TRMT13	OK	negbinomial.size	1.06715e-10	2.1987e-09	TRMT13	FALSE
LRRK2	OK	negbinomial.size	1.07153e-10	2.20579e-09	LRRK2	FALSE
CHMP4B	OK	negbinomial.size	1.14882e-10	2.3628e-09	CHMP4B	FALSE
SNAI2	OK	negbinomial.size	1.16868e-10	2.40155e-09	SNAI2	FALSE
PDCD6	OK	negbinomial.size	1.18541e-10	2.43379e-09	PDCD6	FALSE
FCN1	OK	negbinomial.size	1.22281e-10	2.50836e-09	FCN1	FALSE
SNCG	OK	negbinomial.size	1.2245e-10	2.50964e-09	SNCG	FALSE
ORMDL2	OK	negbinomial.size	1.23838e-10	2.53585e-09	ORMDL2	FALSE
TMEM80	OK	negbinomial.size	1.24728e-10	2.55185e-09	TMEM80	FALSE
RAP1A	OK	negbinomial.size	1.25827e-10	2.57208e-09	RAP1A	FALSE
CYP4V2	OK	negbinomial.size	1.26576e-10	2.58513e-09	CYP4V2	FALSE
RSPH1	OK	negbinomial.size	1.288e-10	2.62827e-09	RSPH1	FALSE
SMAD4	OK	negbinomial.size	1.2925e-10	2.63515e-09	SMAD4	FALSE
ACOX1	OK	negbinomial.size	1.30589e-10	2.66013e-09	ACOX1	FALSE
RAB8B	OK	negbinomial.size	1.31066e-10	2.66752e-09	RAB8B	FALSE
SEL1L	OK	negbinomial.size	1.3344e-10	2.71347e-09	SEL1L	FALSE
OCIAD1	OK	negbinomial.size	1.38981e-10	2.82369e-09	OCIAD1	FALSE
RP11-108M9.4	OK	negbinomial.size	1.45074e-10	2.94493e-09	RP11-108M9.4	FALSE
C9orf78	OK	negbinomial.size	1.51137e-10	3.06535e-09	C9orf78	FALSE
CD46	OK	negbinomial.size	1.53051e-10	3.10146e-09	CD46	FALSE
RPS25	OK	negbinomial.size	1.58981e-10	3.21885e-09	RPS25	FALSE
FGD3	OK	negbinomial.size	1.63788e-10	3.31332e-09	FGD3	FALSE
PDIA6	OK	negbinomial.size	1.64124e-10	3.31724e-09	PDIA6	FALSE
HPCAL1	OK	negbinomial.size	1.66994e-10	3.37232e-09	HPCAL1	FALSE
LY75	OK	negbinomial.size	1.68235e-10	3.39269e-09	LY75	FALSE
CNIH1	OK	negbinomial.size	1.68422e-10	3.39269e-09	CNIH1	FALSE
C16orf45	OK	negbinomial.size	1.68437e-10	3.39269e-09	C16orf45	FALSE
DAZAP2	OK	negbinomial.size	1.74221e-10	3.50615e-09	DAZAP2	FALSE
HNF4G	OK	negbinomial.size	1.85923e-10	3.73844e-09	HNF4G	FALSE
ACSM3	OK	negbinomial.size	1.87395e-10	3.76481e-09	ACSM3	FALSE
ARSE	OK	negbinomial.size	1.88378e-10	3.78131e-09	ARSE	FALSE
SLK	OK	negbinomial.size	1.93701e-10	3.88481e-09	SLK	FALSE
ARHGAP5	OK	negbinomial.size	1.9846e-10	3.97686e-09	ARHGAP5	FALSE
GLT8D1	OK	negbinomial.size	2.10823e-10	4.22098e-09	GLT8D1	FALSE
PDHB	OK	negbinomial.size	2.11808e-10	4.23707e-09	PDHB	FALSE
EIF2S3	OK	negbinomial.size	2.18089e-10	4.35899e-09	EIF2S3	FALSE
RP11-22N19.2	OK	negbinomial.size	2.18308e-10	4.35964e-09	RP11-22N19.2	FALSE
SERTAD4	OK	negbinomial.size	2.33785e-10	4.66473e-09	SERTAD4	FALSE
ITGAX	OK	negbinomial.size	2.34725e-10	4.6795e-09	ITGAX	FALSE
SLC3A2	OK	negbinomial.size	2.51228e-10	5.00423e-09	SLC3A2	TRUE
TMEM92	OK	negbinomial.size	2.52095e-10	5.01723e-09	TMEM92	FALSE
PGLS	OK	negbinomial.size	2.53036e-10	5.03167e-09	PGLS	FALSE
NDUFA11	OK	negbinomial.size	2.54757e-10	5.06159e-09	NDUFA11	FALSE
ZNF292	OK	negbinomial.size	2.60567e-10	5.17263e-09	ZNF292	FALSE
BRD2	OK	negbinomial.size	2.65452e-10	5.26513e-09	BRD2	FALSE
NDUFA10	OK	negbinomial.size	2.74107e-10	5.43221e-09	NDUFA10	FALSE
CRYL1	OK	negbinomial.size	2.76126e-10	5.46758e-09	CRYL1	FALSE
C6orf223	OK	negbinomial.size	2.79558e-10	5.53085e-09	C6orf223	FALSE
BEND5	OK	negbinomial.size	2.83314e-10	5.60042e-09	BEND5	FALSE
RPL27	OK	negbinomial.size	2.86127e-10	5.65124e-09	RPL27	FALSE
SIGIRR	OK	negbinomial.size	2.88478e-10	5.69287e-09	SIGIRR	FALSE
LARS	OK	negbinomial.size	2.89966e-10	5.71741e-09	LARS	FALSE
UPF2	OK	negbinomial.size	3.00814e-10	5.92631e-09	UPF2	FALSE
AKR1A1	OK	negbinomial.size	3.03284e-10	5.96994e-09	AKR1A1	FALSE
ANTXR2	OK	negbinomial.size	3.09248e-10	6.08222e-09	ANTXR2	FALSE
LGR4	OK	negbinomial.size	3.10335e-10	6.09847e-09	LGR4	FALSE
DCK	OK	negbinomial.size	3.22872e-10	6.33951e-09	DCK	FALSE
NDUFA12	OK	negbinomial.size	3.3553e-10	6.58252e-09	NDUFA12	FALSE
DHX15	OK	negbinomial.size	3.42758e-10	6.71869e-09	DHX15	FALSE
HNRNPR	OK	negbinomial.size	3.46589e-10	6.78809e-09	HNRNPR	FALSE
ISOC2	OK	negbinomial.size	3.46904e-10	6.78857e-09	ISOC2	FALSE
TSPAN3	OK	negbinomial.size	3.56355e-10	6.96625e-09	TSPAN3	FALSE
SNRPB2	OK	negbinomial.size	3.56579e-10	6.96625e-09	SNRPB2	FALSE
CLCN3	OK	negbinomial.size	3.60244e-10	7.03198e-09	CLCN3	FALSE
ALDH3A1	OK	negbinomial.size	3.60873e-10	7.03838e-09	ALDH3A1	FALSE
DTX4	OK	negbinomial.size	3.61691e-10	7.04845e-09	DTX4	FALSE
RAB40C	OK	negbinomial.size	3.62935e-10	7.06681e-09	RAB40C	FALSE
GMFG	OK	negbinomial.size	3.64738e-10	7.096e-09	GMFG	FALSE
KDM5B	OK	negbinomial.size	3.73932e-10	7.26884e-09	KDM5B	FALSE
DNAJB4	OK	negbinomial.size	3.77269e-10	7.32761e-09	DNAJB4	FALSE
COX20	OK	negbinomial.size	3.79903e-10	7.37265e-09	COX20	FALSE
SLC25A36	OK	negbinomial.size	3.95343e-10	7.66592e-09	SLC25A36	FALSE
NAP1L1	OK	negbinomial.size	4.00244e-10	7.75451e-09	NAP1L1	TRUE
ARPC1B	OK	negbinomial.size	4.07771e-10	7.89382e-09	ARPC1B	TRUE
HIST2H2BE	OK	negbinomial.size	4.16302e-10	8.0523e-09	HIST2H2BE	FALSE
NEB	OK	negbinomial.size	4.17898e-10	8.07648e-09	NEB	FALSE
RHBDD2	OK	negbinomial.size	4.24267e-10	8.19281e-09	RHBDD2	FALSE
CTC-425F1.4	OK	negbinomial.size	4.45764e-10	8.60082e-09	CTC-425F1.4	FALSE
SERPINA4	OK	negbinomial.size	4.54441e-10	8.76102e-09	SERPINA4	FALSE
EFCAB4A	OK	negbinomial.size	4.67221e-10	8.99996e-09	EFCAB4A	FALSE
MTMR12	OK	negbinomial.size	4.69954e-10	9.04517e-09	MTMR12	FALSE
AFF4	OK	negbinomial.size	4.79448e-10	9.22031e-09	AFF4	FALSE
NDUFA3	OK	negbinomial.size	4.80351e-10	9.23008e-09	NDUFA3	FALSE
AP000350.4	OK	negbinomial.size	4.81328e-10	9.24126e-09	AP000350.4	FALSE
KRT6A	OK	negbinomial.size	4.89308e-10	9.38677e-09	KRT6A	FALSE
AHCYL2	OK	negbinomial.size	4.99753e-10	9.57928e-09	AHCYL2	FALSE
LSM6	OK	negbinomial.size	5.06462e-10	9.69993e-09	LSM6	FALSE
CDK12	OK	negbinomial.size	5.22578e-10	1.00004e-08	CDK12	TRUE
MTX2	OK	negbinomial.size	5.33652e-10	1.0204e-08	MTX2	FALSE
SLC29A1	OK	negbinomial.size	5.38745e-10	1.02929e-08	SLC29A1	FALSE
SSFA2	OK	negbinomial.size	5.50108e-10	1.04951e-08	SSFA2	FALSE
MRPL20	OK	negbinomial.size	5.50222e-10	1.04951e-08	MRPL20	FALSE
COA3	OK	negbinomial.size	5.5845e-10	1.06433e-08	COA3	FALSE
MXI1	OK	negbinomial.size	5.70018e-10	1.0855e-08	MXI1	FALSE
ABI2	OK	negbinomial.size	5.73075e-10	1.09043e-08	ABI2	FALSE
CYP4F3	OK	negbinomial.size	5.90784e-10	1.12321e-08	CYP4F3	FALSE
SRSF10	OK	negbinomial.size	5.96085e-10	1.13237e-08	SRSF10	FALSE
ARL1	OK	negbinomial.size	6.45128e-10	1.22375e-08	ARL1	FALSE
FERMT3	OK	negbinomial.size	6.45238e-10	1.22375e-08	FERMT3	FALSE
ZBTB38	OK	negbinomial.size	6.54163e-10	1.23968e-08	ZBTB38	TRUE
ACAA1	OK	negbinomial.size	6.55165e-10	1.24057e-08	ACAA1	FALSE
E2F7	OK	negbinomial.size	6.709e-10	1.26934e-08	E2F7	FALSE
IDS	OK	negbinomial.size	6.87819e-10	1.3003e-08	IDS	FALSE
AMBP	OK	negbinomial.size	6.88384e-10	1.30031e-08	AMBP	FALSE
SLCO4A1	OK	negbinomial.size	7.03184e-10	1.3272e-08	SLCO4A1	FALSE
EIF3E	OK	negbinomial.size	7.13815e-10	1.34617e-08	EIF3E	FALSE
EHBP1L1	OK	negbinomial.size	7.17697e-10	1.3524e-08	EHBP1L1	TRUE
ZKSCAN1	OK	negbinomial.size	7.18345e-10	1.35254e-08	ZKSCAN1	FALSE
DDX5	OK	negbinomial.size	7.4182e-10	1.39561e-08	DDX5	FALSE
PTPRG	OK	negbinomial.size	7.56401e-10	1.4219e-08	PTPRG	FALSE
PCDH7	OK	negbinomial.size	7.59895e-10	1.42732e-08	PCDH7	FALSE
CFB	OK	negbinomial.size	7.82605e-10	1.4688e-08	CFB	FALSE
CYB561D2	OK	negbinomial.size	7.87945e-10	1.47763e-08	CYB561D2	FALSE
CATSPER2	OK	negbinomial.size	7.95017e-10	1.4897e-08	CATSPER2	FALSE
TBC1D1	OK	negbinomial.size	8.16822e-10	1.52933e-08	TBC1D1	FALSE
REG1A	OK	negbinomial.size	8.39723e-10	1.57095e-08	REG1A	TRUE
NPM1	OK	negbinomial.size	8.52108e-10	1.59285e-08	NPM1	FALSE
RNF43	OK	negbinomial.size	8.63703e-10	1.61323e-08	RNF43	FALSE
SEC16B	OK	negbinomial.size	8.76775e-10	1.63634e-08	SEC16B	FALSE
B3GAT3	OK	negbinomial.size	8.89393e-10	1.65857e-08	B3GAT3	FALSE
LRP5	OK	negbinomial.size	9.17934e-10	1.71043e-08	LRP5	FALSE
BCAS1	OK	negbinomial.size	9.23248e-10	1.71896e-08	BCAS1	FALSE
ASL	OK	negbinomial.size	9.29144e-10	1.72856e-08	ASL	FALSE
FNBP1L	OK	negbinomial.size	9.43374e-10	1.75364e-08	FNBP1L	FALSE
HBEGF	OK	negbinomial.size	9.94566e-10	1.84733e-08	HBEGF	FALSE
PAIP2	OK	negbinomial.size	9.99696e-10	1.85539e-08	PAIP2	FALSE
SLC35F5	OK	negbinomial.size	1.00706e-09	1.86758e-08	SLC35F5	FALSE
DEPDC1B	OK	negbinomial.size	1.01198e-09	1.87522e-08	DEPDC1B	FALSE
ARF4	OK	negbinomial.size	1.03202e-09	1.91083e-08	ARF4	FALSE
RPS18	OK	negbinomial.size	1.05682e-09	1.9552e-08	RPS18	TRUE
LSP1	OK	negbinomial.size	1.06703e-09	1.97254e-08	LSP1	FALSE
TAF1D	OK	negbinomial.size	1.09114e-09	2.01551e-08	TAF1D	FALSE
GIMAP2	OK	negbinomial.size	1.13223e-09	2.08975e-08	GIMAP2	FALSE
SERPINB1	OK	negbinomial.size	1.15634e-09	2.13258e-08	SERPINB1	FALSE
LRMP	OK	negbinomial.size	1.18223e-09	2.1786e-08	LRMP	FALSE
EIF3I	OK	negbinomial.size	1.20799e-09	2.22432e-08	EIF3I	FALSE
ZNF444	OK	negbinomial.size	1.23318e-09	2.26891e-08	ZNF444	FALSE
NDUFS7	OK	negbinomial.size	1.23686e-09	2.27389e-08	NDUFS7	FALSE
CCNK	OK	negbinomial.size	1.24415e-09	2.28551e-08	CCNK	FALSE
MCF2L	OK	negbinomial.size	1.32414e-09	2.43053e-08	MCF2L	FALSE
ARL4A	OK	negbinomial.size	1.33945e-09	2.45671e-08	ARL4A	FALSE
C12orf23	OK	negbinomial.size	1.34184e-09	2.45917e-08	C12orf23	FALSE
NENF	OK	negbinomial.size	1.35702e-09	2.48503e-08	NENF	FALSE
CYBB	OK	negbinomial.size	1.39342e-09	2.5497e-08	CYBB	FALSE
LPAR2	OK	negbinomial.size	1.41177e-09	2.58125e-08	LPAR2	FALSE
RHOBTB3	OK	negbinomial.size	1.419e-09	2.59244e-08	RHOBTB3	FALSE
PTHLH	OK	negbinomial.size	1.47318e-09	2.68933e-08	PTHLH	FALSE
APOBEC1	OK	negbinomial.size	1.51619e-09	2.76568e-08	APOBEC1	FALSE
SEPHS2	OK	negbinomial.size	1.59376e-09	2.90492e-08	SEPHS2	FALSE
SDC3	OK	negbinomial.size	1.60808e-09	2.92873e-08	SDC3	FALSE
CHST4	OK	negbinomial.size	1.63378e-09	2.97323e-08	CHST4	FALSE
AC009501.4	OK	negbinomial.size	1.63626e-09	2.97543e-08	AC009501.4	FALSE
ACSF3	OK	negbinomial.size	1.65157e-09	3.00094e-08	ACSF3	FALSE
PLA2R1	OK	negbinomial.size	1.66558e-09	3.02404e-08	PLA2R1	FALSE
SLC30A5	OK	negbinomial.size	1.68282e-09	3.05119e-08	SLC30A5	FALSE
HNRNPH3	OK	negbinomial.size	1.68314e-09	3.05119e-08	HNRNPH3	FALSE
FUT9	OK	negbinomial.size	1.73569e-09	3.14401e-08	FUT9	FALSE
AK1	OK	negbinomial.size	1.74476e-09	3.15799e-08	AK1	FALSE
MYO1E	OK	negbinomial.size	1.75694e-09	3.17758e-08	MYO1E	FALSE
MSN	OK	negbinomial.size	1.76474e-09	3.18922e-08	MSN	FALSE
FGGY	OK	negbinomial.size	1.77052e-09	3.19718e-08	FGGY	FALSE
SDHA	OK	negbinomial.size	1.7744e-09	3.20173e-08	SDHA	FALSE
PPP1R2	OK	negbinomial.size	1.7832e-09	3.21513e-08	PPP1R2	FALSE
RGS13	OK	negbinomial.size	1.82448e-09	3.28702e-08	RGS13	FALSE
U2AF1	OK	negbinomial.size	1.90988e-09	3.43822e-08	U2AF1	FALSE
TTC38	OK	negbinomial.size	1.99383e-09	3.58659e-08	TTC38	FALSE
PCDP1	OK	negbinomial.size	2.02284e-09	3.63599e-08	PCDP1	FALSE
GOLGA5	OK	negbinomial.size	2.03342e-09	3.65219e-08	GOLGA5	FALSE
ITPKA	OK	negbinomial.size	2.06966e-09	3.71442e-08	ITPKA	FALSE
NBEAL2	OK	negbinomial.size	2.08515e-09	3.73936e-08	NBEAL2	FALSE
POMGNT1	OK	negbinomial.size	2.12304e-09	3.80439e-08	POMGNT1	FALSE
KIAA1430	OK	negbinomial.size	2.13507e-09	3.82302e-08	KIAA1430	FALSE
NAPRT1	OK	negbinomial.size	2.13983e-09	3.8286e-08	NAPRT1	FALSE
FMNL2	OK	negbinomial.size	2.18426e-09	3.90512e-08	FMNL2	FALSE
S100P	OK	negbinomial.size	2.20447e-09	3.93824e-08	S100P	TRUE
COL1A1	OK	negbinomial.size	2.22275e-09	3.96786e-08	COL1A1	FALSE
EMC10	OK	negbinomial.size	2.24522e-09	4.00492e-08	EMC10	TRUE
STK39	OK	negbinomial.size	2.24858e-09	4.00785e-08	STK39	FALSE
METTL7A	OK	negbinomial.size	2.41888e-09	4.30811e-08	METTL7A	FALSE
FAM111A	OK	negbinomial.size	2.44166e-09	4.34538e-08	FAM111A	FALSE
PHB2	OK	negbinomial.size	2.49196e-09	4.43151e-08	PHB2	FALSE
SHISA5	OK	negbinomial.size	2.50503e-09	4.45138e-08	SHISA5	FALSE
UBA7	OK	negbinomial.size	2.53545e-09	4.50201e-08	UBA7	FALSE
FUS	OK	negbinomial.size	2.57381e-09	4.56667e-08	FUS	FALSE
KDELR1	OK	negbinomial.size	2.57974e-09	4.5737e-08	KDELR1	FALSE
LRFN4	OK	negbinomial.size	2.60995e-09	4.62377e-08	LRFN4	FALSE
RP11-1407O15.2	OK	negbinomial.size	2.68148e-09	4.74689e-08	RP11-1407O15.2	FALSE
FN1	OK	negbinomial.size	2.76566e-09	4.8922e-08	FN1	FALSE
SUPT5H	OK	negbinomial.size	2.77494e-09	4.90492e-08	SUPT5H	FALSE
HBS1L	OK	negbinomial.size	2.78471e-09	4.91847e-08	HBS1L	FALSE
TMEM158	OK	negbinomial.size	2.89316e-09	5.10616e-08	TMEM158	FALSE
HNRNPA3	OK	negbinomial.size	2.92635e-09	5.16084e-08	HNRNPA3	FALSE
PPARD	OK	negbinomial.size	3.06241e-09	5.39672e-08	PPARD	FALSE
C3orf52	OK	negbinomial.size	3.09021e-09	5.4416e-08	C3orf52	FALSE
GPATCH2L	OK	negbinomial.size	3.14295e-09	5.53031e-08	GPATCH2L	FALSE
YTHDC2	OK	negbinomial.size	3.22485e-09	5.67015e-08	YTHDC2	FALSE
SSX2IP	OK	negbinomial.size	3.24902e-09	5.70837e-08	SSX2IP	FALSE
FOS	OK	negbinomial.size	3.30888e-09	5.80917e-08	FOS	TRUE
DEPTOR	OK	negbinomial.size	3.35934e-09	5.89333e-08	DEPTOR	FALSE
KIAA2013	OK	negbinomial.size	3.38526e-09	5.93435e-08	KIAA2013	FALSE
HCST	OK	negbinomial.size	3.42807e-09	6.0049e-08	HCST	FALSE
LARP1	OK	negbinomial.size	3.45417e-09	6.0461e-08	LARP1	FALSE
SHOC2	OK	negbinomial.size	3.47708e-09	6.08165e-08	SHOC2	FALSE
FIBP	OK	negbinomial.size	3.54527e-09	6.19627e-08	FIBP	FALSE
CD52	OK	negbinomial.size	3.64421e-09	6.36444e-08	CD52	FALSE
PLLP	OK	negbinomial.size	3.71249e-09	6.47885e-08	PLLP	FALSE
COPA	OK	negbinomial.size	3.7292e-09	6.50316e-08	COPA	FALSE
DIAPH1	OK	negbinomial.size	3.73553e-09	6.50934e-08	DIAPH1	FALSE
NAPEPLD	OK	negbinomial.size	3.73848e-09	6.50964e-08	NAPEPLD	FALSE
FAM173A	OK	negbinomial.size	3.82777e-09	6.66015e-08	FAM173A	FALSE
CADPS	OK	negbinomial.size	3.83358e-09	6.66531e-08	CADPS	FALSE
SYTL1	OK	negbinomial.size	3.9568e-09	6.87443e-08	SYTL1	FALSE
SLC35E2B	OK	negbinomial.size	3.97599e-09	6.90264e-08	SLC35E2B	FALSE
U2SURP	OK	negbinomial.size	4.02121e-09	6.97596e-08	U2SURP	FALSE
CPD	OK	negbinomial.size	4.18677e-09	7.25779e-08	CPD	FALSE
GALNT10	OK	negbinomial.size	4.21429e-09	7.30009e-08	GALNT10	FALSE
SH3BGRL	OK	negbinomial.size	4.26351e-09	7.37988e-08	SH3BGRL	TRUE
DPCR1	OK	negbinomial.size	4.30773e-09	7.45091e-08	DPCR1	TRUE
RANGAP1	OK	negbinomial.size	4.33975e-09	7.50075e-08	RANGAP1	FALSE
BCL10	OK	negbinomial.size	4.37824e-09	7.56167e-08	BCL10	FALSE
NR2F2-AS1	OK	negbinomial.size	4.38611e-09	7.56968e-08	NR2F2-AS1	FALSE
LAMB2	OK	negbinomial.size	4.43868e-09	7.65476e-08	LAMB2	FALSE
GPR125	OK	negbinomial.size	4.50588e-09	7.76492e-08	GPR125	FALSE
USH1C	OK	negbinomial.size	4.73232e-09	8.14914e-08	USH1C	FALSE
SCML1	OK	negbinomial.size	4.74608e-09	8.16682e-08	SCML1	FALSE
OPLAH	OK	negbinomial.size	4.75192e-09	8.17086e-08	OPLAH	FALSE
PLK2	OK	negbinomial.size	4.76401e-09	8.18563e-08	PLK2	TRUE
SLC9A3R1	OK	negbinomial.size	4.81646e-09	8.26967e-08	SLC9A3R1	FALSE
SYNC	OK	negbinomial.size	4.84049e-09	8.30484e-08	SYNC	FALSE
SPTAN1	OK	negbinomial.size	4.86034e-09	8.33278e-08	SPTAN1	FALSE
GPR110	OK	negbinomial.size	4.96224e-09	8.50124e-08	GPR110	FALSE
UBA52	OK	negbinomial.size	5.11332e-09	8.75366e-08	UBA52	FALSE
ZNF83	OK	negbinomial.size	5.35104e-09	9.15391e-08	ZNF83	FALSE
DHCR7	OK	negbinomial.size	5.43945e-09	9.29836e-08	DHCR7	FALSE
GNB1	OK	negbinomial.size	5.47417e-09	9.35087e-08	GNB1	FALSE
CPVL	OK	negbinomial.size	5.54408e-09	9.46338e-08	CPVL	FALSE
PAPOLA	OK	negbinomial.size	5.55721e-09	9.47887e-08	PAPOLA	FALSE
TLE1	OK	negbinomial.size	5.67572e-09	9.67396e-08	TLE1	FALSE
FASN	OK	negbinomial.size	5.71559e-09	9.73483e-08	FASN	FALSE
LMTK3	OK	negbinomial.size	5.73921e-09	9.76794e-08	LMTK3	FALSE
FTL	OK	negbinomial.size	5.77109e-09	9.81505e-08	FTL	TRUE
ZNF106	OK	negbinomial.size	5.95794e-09	1.01255e-07	ZNF106	FALSE
EMP1	OK	negbinomial.size	6.02542e-09	1.02327e-07	EMP1	FALSE
ATP7B	OK	negbinomial.size	6.03005e-09	1.02331e-07	ATP7B	FALSE
KANSL1L	OK	negbinomial.size	6.08072e-09	1.03116e-07	KANSL1L	FALSE
C12orf45	OK	negbinomial.size	6.11326e-09	1.03593e-07	C12orf45	FALSE
MCTP2	OK	negbinomial.size	6.22237e-09	1.05366e-07	MCTP2	FALSE
MAL	OK	negbinomial.size	6.34617e-09	1.07384e-07	MAL	FALSE
UPK1B	OK	negbinomial.size	6.36241e-09	1.07581e-07	UPK1B	FALSE
GSS	OK	negbinomial.size	6.37218e-09	1.07669e-07	GSS	FALSE
CREBL2	OK	negbinomial.size	6.58929e-09	1.11257e-07	CREBL2	FALSE
CHMP4C	OK	negbinomial.size	6.59439e-09	1.11263e-07	CHMP4C	FALSE
DAD1	OK	negbinomial.size	6.62951e-09	1.11774e-07	DAD1	FALSE
PXMP2	OK	negbinomial.size	6.73805e-09	1.13523e-07	PXMP2	FALSE
RP11-473M20.16	OK	negbinomial.size	6.86839e-09	1.15635e-07	RP11-473M20.16	FALSE
PLEC	OK	negbinomial.size	6.90653e-09	1.16194e-07	PLEC	TRUE
EIF4B	OK	negbinomial.size	6.92173e-09	1.16366e-07	EIF4B	FALSE
[truncated: 4,242 more rows]

## Sheet: Sheet1
Supplementary Table 5. List of differentially expressed genes over the pseudotime with BEAM analysis
[truncated: 3,055 more rows]
