# Supplementary material for: Single-cell transcriptome reveals the heterogeneity of malignant ductal cells and the prognostic value of REG4 and SPINK1 in primary pancreatic ductal adenocarcinoma
Source: PeerJ. 2024 May 28;12:e17350. doi: 10.7717/peerj.17350 (PMC11141562; doi:10.7717/peerj.17350)
Supplement: Supplemental Information 6 [file peerj-12-17350-s006.xls]

## Sheet: Sheet1
ITEM TO CHECK	IMPORTANCE	CHECKLIST
EXPERIMENTAL DESIGN
Definition of experimental and control groups	E	Figure 6a-d
Number within each group	E	Line 168
Assay carried out by core lab or investigator's lab?	D
Acknowledgement of authors' contributions	D
SAMPLE
Description	E	Line 158-168
Volume/mass of sample processed	D
Microdissection or macrodissection	E	cells were used for qRT-PCR analysis
Processing procedure	E	Line 158-168
If frozen - how and how quickly?	E	not applicable
If fixed - with what, how quickly?	E	not applicable
Sample storage conditions and duration (especially for FFPE samples)	E	RNA were frozened at -80℃ immediately after extracted, cDNA were frozened at -20℃ and thawed on ice before use.
NUCLEIC ACID EXTRACTION
Procedure and/or instrumentation	E	Line 168
Name of kit and details of any modifications	E	RNA-quick purification kit (Yishan, RN001)
Source of additional reagents used	D
Details of DNase or RNAse treatment	E	ethyl alcohol (Macklin, E809056)
Contamination assessment (DNA or RNA)	E	RNA purification was assessed by Nanodrop 2000
Nucleic acid quantification	E	Line 168
Instrument and method	E	Nanodrop 2000, see Line 168
Purity (A260/A280)	D
Yield	D
RNA integrity method/instrument	E	Line 168
RIN/RQI or Cq of 3' and 5' transcripts	E	see Supplementary File 3
Electrophoresis traces	D
Inhibition testing (Cq dilutions, spike or other)	E	see Supplementary File 3
REVERSE TRANSCRIPTION
Complete reaction conditions	E	refer to instructions of HiScript II qRT SuperMix for qPCR(+gDNA wiper) (Vazyme, R233)
Amount of RNA and reaction volume	E	20μL
Priming oligonucleotide (if using GSP) and concentration	E	Line 170-175
Reverse transcriptase and concentration	E	refer to instructions of HiScript II qRT SuperMix for qPCR(+gDNA wiper) (Vazyme, R233)
Temperature and time	E	refer to instructions of HiScript II qRT SuperMix for qPCR(+gDNA wiper) (Vazyme, R233)
Manufacturer of reagents and catalogue numbers	D
Cqs with and without RT	D*
Storage conditions of cDNA	D
qPCR TARGET INFORMATION
If multiplex, efficiency and LOD of each assay.	E	not applicable
Sequence accession number	E	The sequence were refered to origene (www.origene.com).
Location of amplicon	D
Amplicon length	E	not applicable
In silico specificity screen (BLAST, etc)	E	not applicable
Pseudogenes, retropseudogenes or other homologs?	D
Sequence alignment	D
Secondary structure analysis of amplicon	D
Location of each primer by exon or intron (if applicable)	E	not applicable
What splice variants are targeted?	E	not applicable
qPCR OLIGONUCLEOTIDES
Primer sequences	E	Line 170-175
RTPrimerDB Identification Number	D
Probe sequences	D**
Location and identity of any modifications	E	no
Manufacturer of oligonucleotides	D
Purification method	D
qPCR PROTOCOL
Complete reaction conditions	E	refer to instructions of ChamQ Universal SYBR qPCR Master Mix (Vazyme, Q711)
Reaction volume and amount of cDNA/DNA	E	10uL, 1uL
Primer, (probe), Mg++ and dNTP concentrations	E	Primer: 10uM. Not applicable for others, refer to instructions of ChamQ Universal SYBR qPCR Master Mix (Vazyme, Q711)
Polymerase identity and concentration	E	refer to instructions of ChamQ Universal SYBR qPCR Master Mix (Vazyme, Q711)
Buffer/kit identity and manufacturer	E	ChamQ Universal SYBR qPCR Master Mix (Vazyme, Q711)
Exact chemical constitution of the buffer	D
Additives (SYBR Green I, DMSO, etc.)	E	ddH2O
Manufacturer of plates/tubes and catalog number	D
Complete thermocycling parameters	E	40-45
Reaction setup (manual/robotic)	D
Manufacturer of qPCR instrument	E	The QuantStudio 6 and 7 Flex real-time PCR systems (ThermoFisher)
qPCR VALIDATION
Evidence of optimisation (from gradients)	D
Specificity (gel, sequence, melt, or digest)	E	see Supplementary File 3
For SYBR Green I, Cq of the NTC	E	see Supplementary File 3
Standard curves with slope and y-intercept	E	see Supplementary File 3
PCR efficiency calculated from slope	E	see Supplementary File 3
Confidence interval for PCR efficiency or standard error	D
r2 of standard curve	E	see Supplementary File 3
Linear dynamic range	E	see Supplementary File 3
Cq variation at lower limit	E	see Supplementary File 3
Confidence intervals throughout range	D
Evidence for limit of detection	E	see Supplementary File 3
If multiplex, efficiency and LOD of each assay.	E	not applicable
DATA ANALYSIS
qPCR analysis program (source, version)	E	QuantStudio 6 and 7 Flex Real-Time PCR System Software
Cq method determination	E	2-ΔΔCt method
Outlier identification and disposition	E	with QuantStudio 6 and 7 Flex Real-Time PCR System Software
Results of NTCs	E	see Supplementary File 3
Justification of number and choice of reference genes	E	18S
Description of normalisation method	E	with QuantStudio 6 and 7 Flex Real-Time PCR System Software
Number and concordance of biological replicates	D
Number and stage (RT or qPCR) of technical replicates	E	3, qPCR
Repeatability (intra-assay variation)	E	see Supplementary File 3
Reproducibility (inter-assay variation, %CV)	D
Power analysis	D
Statistical methods for result significance	E	Line168-170
Software (source, version)	E	QuantStudio 6 and 7 Flex Real-Time PCR System Software
Cq or raw data submission using RDML	D
Table 1. MIQE checklist for authors, reviewers and editors. All essential information (E) must be submitted with the manuscript. Desirable
information (D) should be submitted if available. If using primers obtained from RTPrimerDB, information on qPCR target, oligonucleotides,
protocols and validation is available from that source.
*: Assessing the absence of DNA using a no RT assay is essential when first extracting RNA. Once the sample has been validated as
RDNA-free, inclusion of a no-RT control is desirable, but no longer essential.
**: Disclosure of the probe sequence is highly desirable and strongly encouraged. However, since not all commercial pre-designed assay
vendors provide this information, it cannot be an essential requirement. Use of such assays is advised against.
