# Supplementary material for: Single-cell transcriptome reveals the heterogeneity of malignant ductal cells and the prognostic value of REG4 and SPINK1 in primary pancreatic ductal adenocarcinoma
Source: PeerJ journal article supplement (doi:10.7717/peerj.17350), 2024-05-28

# Cropped blots of REG4 from Figure 6

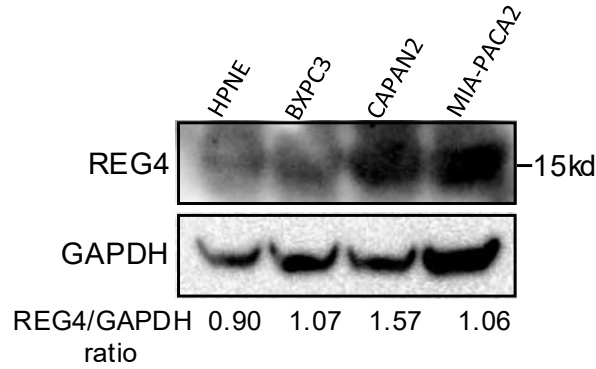

## Full length blots

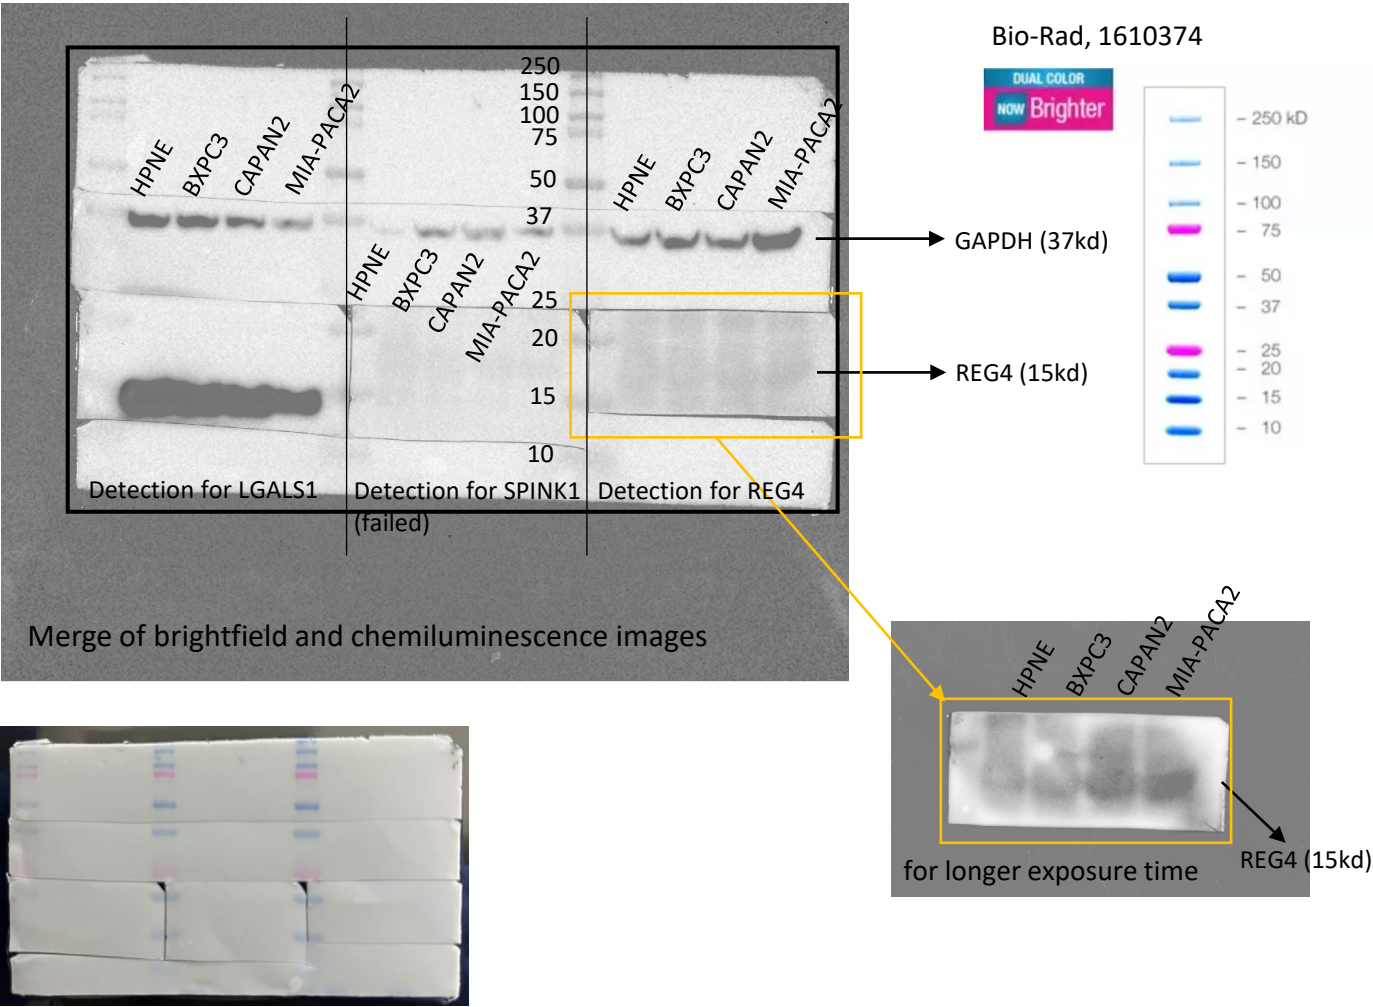

Cropped blots of SPINK1 from Figure 6

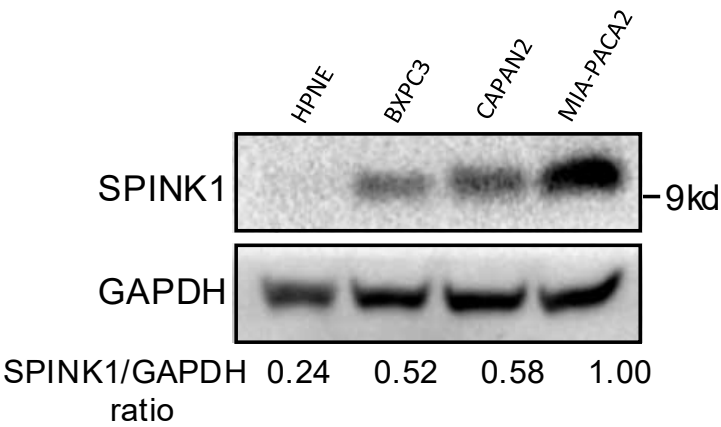

Full length blots

Bio-Rad, 1610374

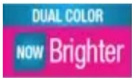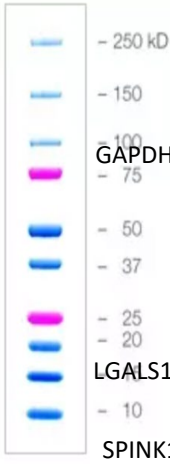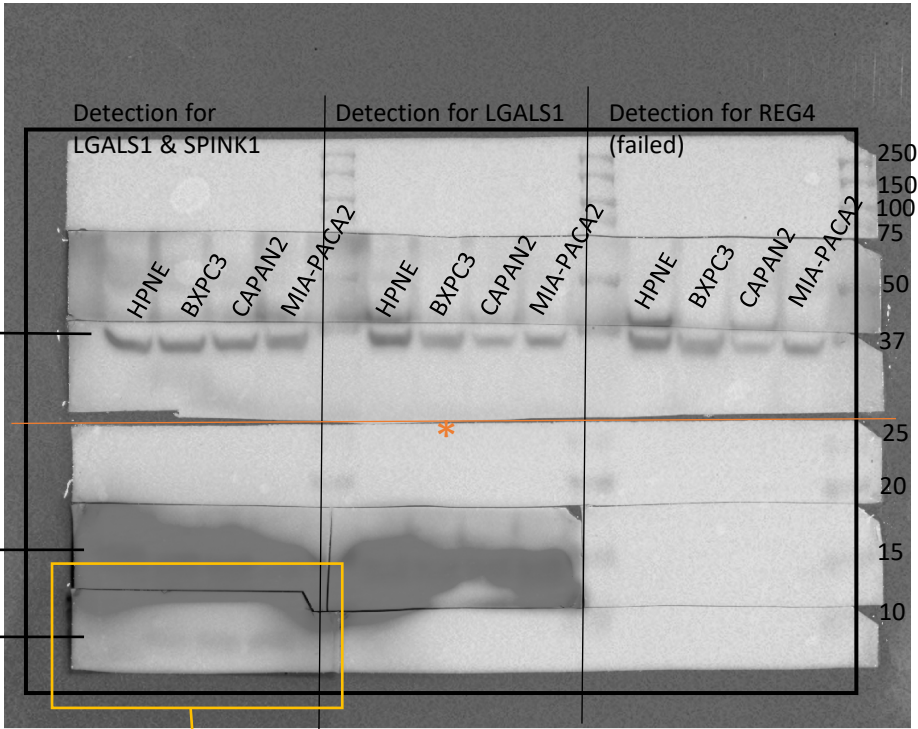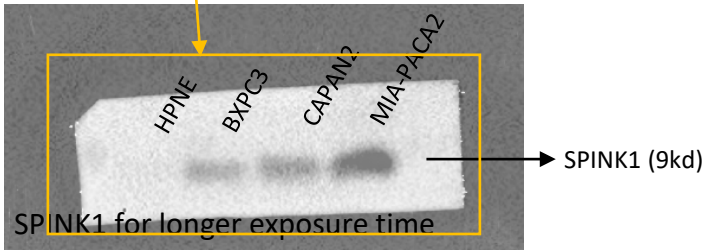

\*The PVDF membrane is not continuous here, because the upper part and the lower part were transferred separately for different time.

# Cropped blots of LGALS1 from Figure 6

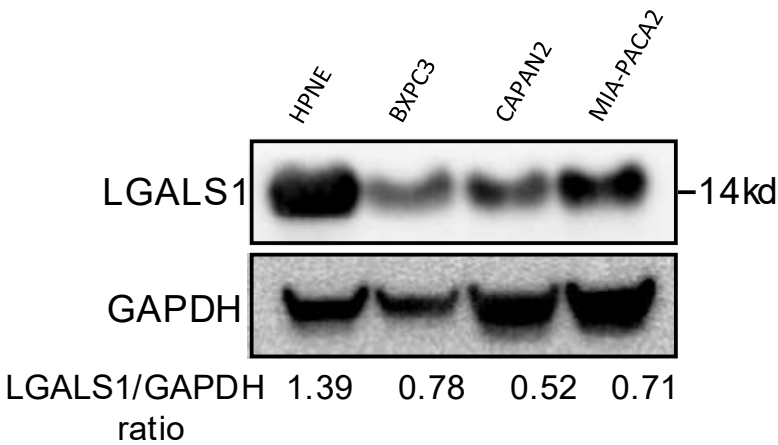

## Full length blots

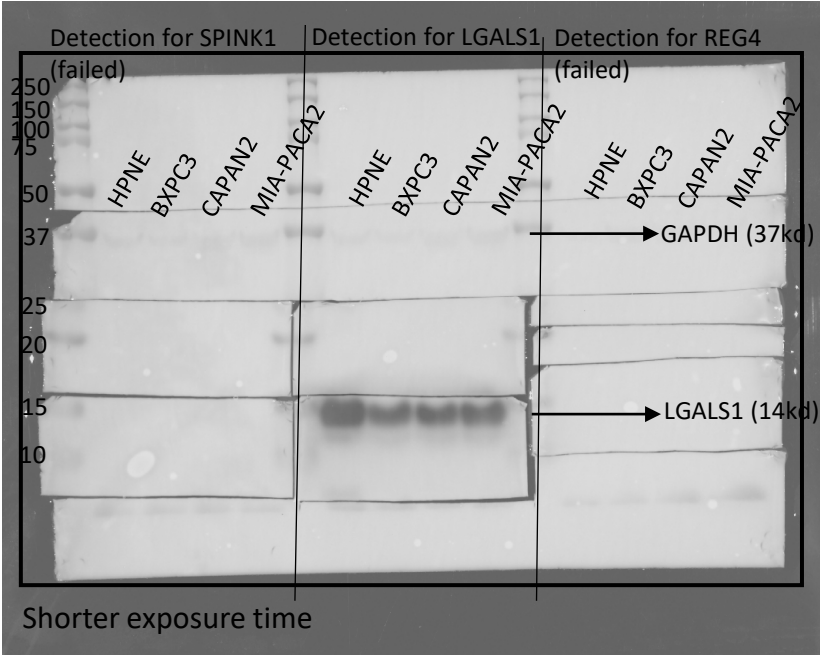

Bio-Rad, 1610374

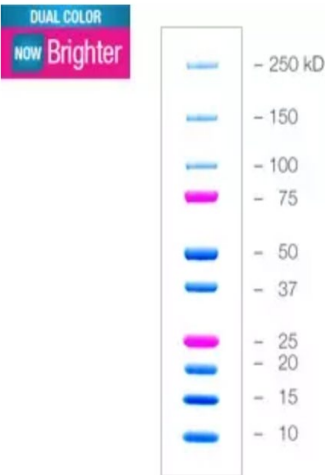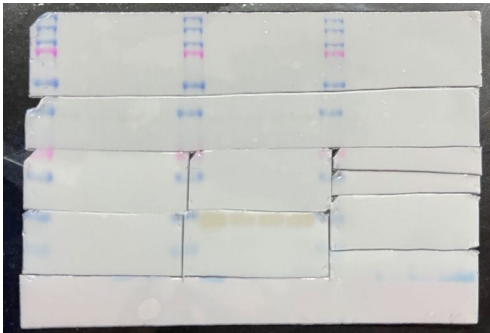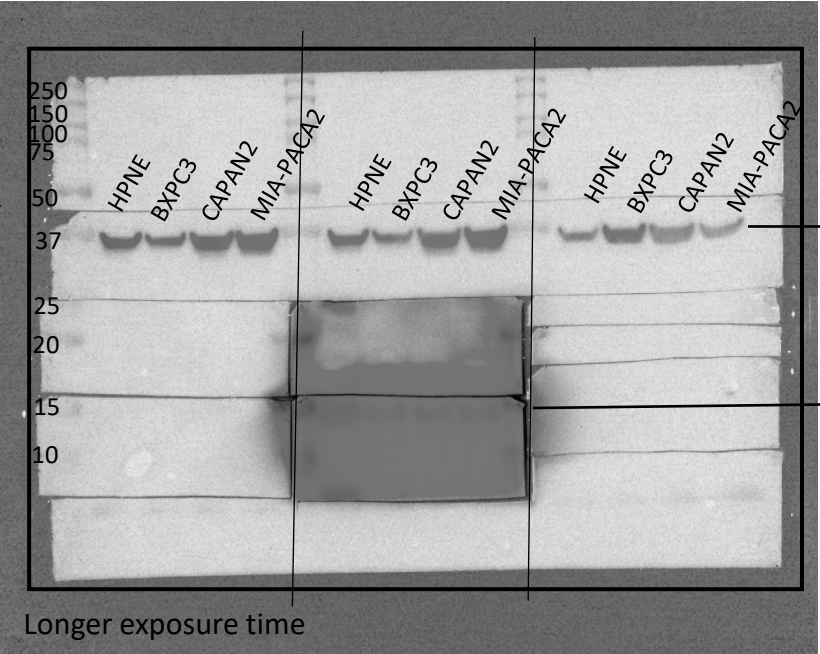

Supplement: Supplementary_File_1.zip [file Supplementary_File_1.zip]
